# Supplementary material for: Identification of key immune-related genes in dilated cardiomyopathy using bioinformatics analysis
Source: Sci Rep. 2023 Feb 1;13:1820. doi: 10.1038/s41598-022-26277-w (PMC9892583; doi:10.1038/s41598-022-26277-w)
Supplement: Supplementary file 1 — Supplementary Information 1. [file 41598_2022_26277_MOESM1_ESM.xlsx]

## Sheet: Sheet1
Genes	GSM82386	GSM82387	GSM82388	GSM82389	GSM82390	GSM82391	GSM82392	GSM2251530	GSM2251531	GSM2251532	GSM2251533	GSM2251534	GSM2251535	GSM2251536	GSM2251537	GSM2251538	GSM2251539	GSM82381	GSM82382	GSM82383	GSM82384	GSM82385	GSM2251540	GSM2251541	GSM2251542	GSM2251543	GSM2251544	GSM2251545	GSM2251546	logFC	AveExpr	t	P.Value	adj.P.Val	B
A2M	3.97569	4.23489	4.33839	4.45928	4.16806	4.66736	4.47207	4.79923	4.00982	4.59194	4.18185	3.91127	4.05058	3.88958	4.22627	3.35929	4.15142	4.69933	4.68458	4.40827	4.68458	4.75658	4.51149	4.1705	4.41203	4.53306	3.66776	4.29884	4.11555	-0.206763	4.29067	-1.68549	0.101927	0.253909	-5.00156
AACS	2.35921	2.76747	3.13685	2.64149	2.72574	2.79349	3.19874	2.43391	2.57397	2.19941	1.64074	3.49277	2.79146	2.9037	3.2651	2.86152	3.0057	3.01471	3.56436	3.31672	3.12868	3.10317	3.29779	3.33041	3.28635	2.40667	3.95427	3.05491	2.96577	-0.449558	2.93845	-2.99695	0.00532674	0.038626	-2.42525
AAGAB	2.17944	2.40964	2.40063	2.18247	2.46352	2.2043	2.27259	2.78135	2.18804	2.10251	2.19489	2.27308	2.35459	2.52695	2.46352	2.66543	2.21241	2.26374	2.1869	2.05267	1.98361	2.67972	2.7098	2.15292	2.62141	2.66079	1.98203	2.57838	1.98934	0.0238352	2.33575	0.256371	0.799357	0.884429	-6.32882
AAK1	2.89281	2.89829	2.85124	3.08353	2.51636	3.00747	2.93408	2.88028	3.02657	2.64867	3.02373	3.00262	2.79198	2.69652	2.93261	2.91638	2.52289	2.69195	2.49717	2.90276	2.67602	2.7047	2.3141	2.97096	2.80532	2.90145	2.46165	2.8232	2.99348	0.131791	2.80582	1.71961	0.095464	0.244626	-4.94846
AAMDC	2.81341	3.17389	2.92003	3.07706	2.96936	3.12412	2.93126	2.85435	2.37797	2.47107	1.9614	3.72784	2.87467	3.1713	2.98774	2.77669	3.65193	3.76629	3.63078	3.62045	3.15119	3.2814	3.33236	3.62819	3.10288	3.65574	2.99651	3.45542	3.36077	-0.481982	3.13262	-3.63798	0.000986798	0.0142977	-0.870859
AAMP	2.9408	3.04001	2.83923	2.98858	3.14297	3.05059	3.20283	2.64675	2.24992	2.80293	2.58713	2.63609	3.12717	3.31159	3.19786	3.14868	3.0469	2.8399	2.711	2.83323	3.10317	2.91002	3.47764	2.96189	2.59868	3.03479	2.73155	2.99396	2.85544	0.0178859	2.93142	0.181984	0.856779	0.922444	-6.34513
AASDHPPT	3.17289	2.84049	2.97775	2.68462	2.98175	2.72354	2.62313	2.7788	2.49322	2.55297	2.92918	2.72969	3.00292	2.97462	3.15706	3.10595	3.53372	2.8362	2.8292	2.71619	3.01052	3.05338	3.01443	3.25905	2.50941	2.75096	2.3289	2.49646	2.91297	0.0879746	2.86138	0.877503	0.386957	0.58193	-5.98075
AASS	2.01178	1.20874	2.17035	1.79831	1.83511	2.20917	2.28768	1.90642	1.53946	1.60819	1.36459	1.87062	2.11225	3.28363	1.8905	1.72085	2.28288	1.96224	2.30379	2.78614	2.25326	2.12741	2.24625	2.78835	2.7808	2.28564	1.95847	2.92223	2.97844	-0.502328	2.15495	-3.22865	0.00293526	0.0268107	-1.87959
AATF	2.97322	2.87672	3.03454	3.0254	2.7352	3.05172	3.1469	2.90062	2.43078	2.60777	2.55501	2.32222	3.117	3.28024	2.92271	3.08606	3.36295	3.04629	2.76383	2.88969	2.87101	3.02113	3.37305	3.18904	2.83165	2.79325	2.91104	2.88136	2.75096	-0.0359304	2.92246	-0.372232	0.71225	0.826258	-6.29245
ABAT	2.93261	1.20343	3.0469	2.94483	3.35374	2.36144	2.97096	2.73998	2.92542	2.54456	2.68841	2.6028	2.71504	2.9852	3.00996	2.87339	2.92862	2.76437	2.04129	2.73022	3.08107	1.91729	2.68951	2.86526	2.39872	1.87736	2.79198	2.19102	2.60024	0.258853	2.64743	1.63687	0.111761	0.26865	-5.07568
ABCA1	2.77073	2.71698	3.06025	2.90563	3.51995	3.33929	2.9898	3.41562	2.84628	2.61465	2.95559	3.0622	2.75578	3.08156	2.62923	3.24604	2.60464	3.45658	2.82009	2.76068	2.70601	2.88369	2.75876	3.44019	2.7362	2.98288	3.10049	2.79819	3.04789	0.0137883	2.96572	0.133024	0.895034	0.943918	-6.35285
ABCA2	2.64446	2.87128	2.53223	2.37797	2.34402	2.5298	2.74691	2.43803	2.32673	2.75071	2.32306	2.38447	2.90307	2.53071	2.84078	2.86902	2.48452	2.31497	2.50274	2.64351	2.52662	2.35715	2.61496	2.78714	2.46788	2.1129	3.10172	2.3665	2.60192	0.0490545	2.56192	0.5545	0.583211	0.737535	-6.20844
ABCA5	2.66212	2.61993	2.49361	2.40667	2.53514	2.6786	2.71186	2.91159	2.96517	2.49455	2.3958	2.78288	2.31791	2.63764	2.54834	2.48038	2.75396	2.69652	2.87	2.75682	2.46165	2.21142	2.41032	2.95282	2.87492	2.33808	2.68308	2.1635	3.12207	-0.0168947	2.61853	-0.183054	0.855947	0.922325	-6.34493
ABCA6	2.34442	2.02277	2.64924	3.02323	2.48069	2.62024	3.35198	2.96773	3.60744	3.45097	2.71456	2.47653	3.86124	2.8311	3.07836	2.90091	2.90869	2.72143	3.11051	2.95874	2.86526	1.82172	1.91808	2.3792	1.6289	1.69984	2.32183	3.21716	2.83849	0.442654	2.71625	2.38501	0.023371	0.0979571	-3.75158
ABCA8	3.0286	3.38478	4.00183	3.88227	3.67615	3.60596	4.28113	3.83977	4.05582	3.18503	2.89748	3.93768	4.36397	3.7611	4.2552	4.0118	3.7948	3.81701	4.1587	3.65339	3.84228	3.07681	3.00912	4.72061	3.10102	2.15569	3.19002	3.23577	3.35929	0.319243	3.63045	1.67494	0.103996	0.256719	-5.01779
ABCB7	2.71032	2.9108	2.83136	2.81818	2.71698	2.58679	2.76349	2.30504	2.54488	2.02418	2.51911	3.1176	2.62164	3.10856	3.04629	2.94783	3.09662	2.84372	2.84988	3.01688	2.74058	2.88236	3.02933	3.12382	3.05642	2.54584	2.5298	2.768	2.94301	-0.115529	2.79308	-1.1726	0.249879	0.445432	-5.68805
ABCC1	2.94622	2.49021	2.93382	2.79297	2.59619	2.71186	2.62421	2.62057	2.6326	2.59136	2.05133	2.77119	3.00646	2.80714	2.7902	2.82862	2.69741	2.77342	2.92815	2.8032	2.64675	2.68134	2.9171	2.3837	2.82666	2.6409	2.6611	3.07733	3.2147	-0.096647	2.73954	-1.12728	0.268266	0.465474	-5.73808
ABCC10	2.48957	2.12194	2.35624	2.39425	2.16498	2.52005	2.31331	2.9898	2.92271	2.75488	2.8114	2.72832	2.60487	2.23506	2.30716	2.15477	1.91412	2.6941	2.55532	2.52083	2.74028	2.28564	1.85606	2.37526	2.46605	2.56207	2.76139	2.64002	2.61825	-0.0484234	2.47789	-0.453139	0.653601	0.787788	-6.25918
ABCC5	3.36198	2.76293	3.04075	3.10234	3.05491	3.19458	3.50393	2.38614	2.76437	2.67195	2.85849	2.78593	2.778	2.76185	3.21324	2.77903	3.07653	3.5123	3.66857	3.51394	3.19428	3.25244	3.15148	3.07681	4.54079	4.48603	3.20415	3.69914	3.03479	-0.581015	3.1873	-4.07503	0.000295988	0.00689638	0.254442
ABCC9	2.06784	1.56403	2.09876	1.61388	1.6549	1.77551	2.39541	1.94184	1.47945	1.9614	2.14348	2.51724	1.93699	2.05345	2.17142	2.06836	2.58268	2.03726	2.11933	2.05133	2.31194	2.10776	2.05267	3.20992	2.3887	2.04837	1.80256	2.09456	2.22974	-0.202943	2.08554	-1.65676	0.107646	0.262284	-5.04557
ABCD3	3.29047	3.22206	3.92767	3.34906	2.98318	3.0436	3.56909	3.15467	3.25393	3.04187	3.5067	2.94132	2.35308	2.55434	2.52662	3.00098	2.68195	3.25867	3.17693	3.3589	3.30847	3.7234	3.53503	3.14449	3.43452	4.80845	3.53503	3.9654	2.95533	-0.434664	3.26225	-2.72621	0.0104397	0.0578533	-3.03459
ABCD4	2.47427	2.36358	2.2563	2.59742	2.43259	2.50467	2.28957	2.42274	2.46854	2.8991	2.70337	2.93517	2.39353	2.30961	2.40273	2.31331	2.28564	2.41233	2.3873	2.37765	2.40964	2.43993	2.38988	2.01803	2.46888	2.27218	2.53697	3.00489	2.56893	0.0331059	2.45996	0.395611	0.695099	0.81566	-6.2835
ABCE1	2.76262	2.89195	2.89979	2.34319	2.87492	2.61525	2.33086	2.72143	2.58152	2.57485	2.7359	2.66947	2.39284	2.65733	2.43885	2.55996	2.72704	2.66833	2.54095	2.4664	2.72574	2.888	2.8269	2.82036	3.16111	2.71775	2.39425	2.95425	2.63365	-0.0991537	2.67501	-1.26535	0.215167	0.405306	-5.5801
ABCF1	3.35241	3.16331	3.12927	3.2563	3.07653	3.10413	3.19702	2.79123	2.95874	2.89431	3.00019	3.17753	2.87817	3.10481	2.8156	3.12207	2.77185	3.11607	2.98262	3.02565	3.14868	3.23505	3.20223	3.24701	3.29527	3.30152	3.19458	3.22176	2.98805	-0.116532	3.09489	-1.80342	0.0810393	0.220954	-4.81436
ABCF2	3.16111	2.93607	2.93738	2.87264	2.99721	2.83165	2.90848	2.37002	2.72489	2.71432	2.50111	2.75789	2.9465	2.99297	2.85544	2.93204	2.58653	2.81389	2.64149	2.6955	2.99588	3.21438	3.36664	2.77318	3.10443	3.11081	2.81285	3.13042	3.01871	-0.148108	2.88636	-1.79386	0.0825862	0.223273	-4.82993
ABCG1	2.51576	2.01178	2.49646	2.01019	2.58653	2.92842	2.48493	2.02741	1.06527	1.32084	2.0056	2.53071	2.21142	2.83088	2.5475	3.16654	2.1841	2.65789	2.85097	2.99193	2.51754	2.77398	3.32286	3.18363	3.3996	2.95449	3.43408	2.41818	3.07546	-0.675383	2.56914	-4.03332	0.000332501	0.00731712	0.145357
ABHD17A	3.49328	3.51282	3.14026	3.29816	3.16791	3.58732	3.70503	3.24834	3.33596	3.14737	2.96547	2.95757	3.46643	3.73052	3.84228	3.68689	3.6526	3.27884	3.65193	3.58607	3.40111	3.59162	3.26004	2.97844	3.22307	3.37068	3.28754	3.18284	3.21859	0.0722323	3.37824	0.766413	0.449222	0.635652	-6.07024
ABHD18	2.29127	2.29172	1.95339	1.81605	1.93975	2.06085	1.61388	2.23821	1.773	1.75661	2.57926	3.04053	2.32385	2.12387	3.23671	1.82056	2.41561	2.05267	2.27436	1.98027	2.10251	2.01575	2.36608	3.2814	2.38065	1.27886	1.40386	1.51524	2.80344	0.0713957	2.16311	0.396802	0.69423	0.81566	-6.28303
ABHD2	4.00798	3.02259	3.14399	3.07931	2.66975	2.72601	3.33806	2.04129	3.09599	3.35765	3.21367	2.2799	2.84349	3.14868	3.02964	2.53036	2.11817	2.36929	2.90038	2.39317	2.69906	3.07373	3.20791	1.8905	3.81701	3.67446	2.65291	3.70079	2.7997	-0.0111919	2.92501	-0.0582081	0.953956	0.973596	-6.36001
ABHD3	1.35974	1.29657	1.67353	1.44669	1.79447	1.60403	1.44669	2.70071	2.3811	2.20209	1.96835	1.75125	2.12687	1.94526	2.10056	2.6057	1.61599	1.95264	2.31455	1.47261	1.40386	1.37019	1.29107	1.919	2.14746	1.33876	1.64749	1.71328	2.06898	0.163515	1.81584	1.13247	0.266112	0.46317	-5.73244
ABHD4	3.01771	2.50557	2.886	3.08456	3.15023	3.02828	2.84427	2.05267	1.76998	2.74028	2.35669	2.61525	2.99965	3.12619	3.08938	3.17954	3.05616	2.97375	3.00098	2.95757	2.60249	2.89005	2.99539	2.99746	4.09415	2.78662	3.01052	2.88028	2.86152	-0.209974	2.88114	-1.47125	0.151293	0.325701	-5.31439
ABHD5	2.48038	2.21406	2.12508	1.95339	1.99167	2.2609	2.17837	2.04761	1.8291	1.99167	2.073	2.25997	1.89434	2.34887	1.97855	2.36517	2.06151	2.35268	2.16695	2.33002	2.28768	2.5185	2.78264	2.33565	2.55501	2.53514	2.52763	2.98721	2.66133	-0.382571	2.27911	-4.76197	4.24e-05	0.00240203	2.08555
ABI1	2.67195	2.68101	2.49684	2.27902	2.45921	2.19774	2.14169	2.64385	2.46538	2.56575	2.51754	2.30839	2.61556	2.51204	2.55365	2.26047	2.41373	2.23728	2.26751	2.0652	2.37079	2.1129	2.51482	2.25147	2.43626	2.34044	2.0497	2.57517	2.3873	0.157137	2.39285	2.2473	0.031873	0.117833	-4.02271
ABITRAM	3.02565	3.09929	3.24321	3.29629	3.0745	3.20155	3.15467	3.02933	3.24248	3.03343	3.45097	3.37198	3.27413	3.45498	3.14712	3.10205	3.42447	3.63433	3.03788	3.23577	3.09416	2.93456	3.21438	3.30808	2.50596	2.80764	2.8311	2.60695	2.91104	0.203148	3.12924	2.27487	0.0299753	0.113632	-3.96932
ABL1	3.13651	3.277	3.16975	3.34084	3.24701	3.28102	3.23997	3.0381	2.36066	3.25588	2.89195	2.4853	3.1454	3.42644	3.01181	3.27304	3.40256	2.99965	3.32634	3.13113	3.36946	3.14596	3.35814	3.21814	3.53569	3.45658	2.94834	3.43727	2.69388	-0.10172	3.15875	-0.97577	0.336724	0.535305	-5.89204
ABLIM1	4.03102	3.93324	4.02947	4.04093	3.97812	4.08555	4.08171	3.29816	3.47486	3.65574	3.58607	4.05582	3.77672	4.07084	3.98163	3.84453	4.00017	4.09826	4.16577	4.11332	4.28937	4.092	3.59694	4.8549	4.21664	3.86246	3.58865	3.7456	4.04454	-0.177788	3.95148	-1.65622	0.107756	0.262402	-5.0464
ABLIM3	3.55608	3.91799	4.11812	4.29884	3.62603	3.92164	4.26861	3.27918	3.87872	3.74807	3.37485	3.60386	4.10258	4.11555	4.33271	4.12238	4.07517	4.07727	4.03102	4.26345	3.99684	3.81817	3.45974	4.08555	3.35085	3.2985	4.52242	3.28408	4.03498	0.0504691	3.88149	0.38176	0.705241	0.821551	-6.28887
ABR	2.97096	3.31886	3.28967	3.14868	3.19634	3.38656	3.45596	3.00596	2.9561	3.16199	2.95101	3.45397	3.26923	3.25281	3.35338	3.42499	3.47582	3.00996	3.39922	3.52216	3.79033	3.41049	3.17514	3.66265	3.06967	2.73873	3.43268	2.80375	3.50825	-0.0540386	3.26191	-0.55663	0.581773	0.736618	-6.20726
ABRAXAS2	3.02708	2.68863	2.93911	2.9663	2.81037	2.97629	2.79325	3.01718	3.04154	3.12809	3.01382	3.35122	2.5298	2.68863	2.26847	2.48129	2.61465	2.87726	2.76409	2.85985	3.01305	2.94054	2.7775	3.06248	3.06748	2.79485	3.0757	2.73667	3.01359	-0.0719769	2.87306	-0.823966	0.416247	0.605636	-6.02532
ABTB2	3.51852	3.65193	3.33087	3.70605	2.88569	3.28856	3.35765	2.00483	3.37112	3.22771	3.99185	3.03554	3.28408	2.91159	3.32555	3.98163	2.40107	2.85985	2.61105	3.14957	3.03119	3.12868	3.59621	2.44751	2.71775	3.25183	3.71718	3.14052	2.67747	0.224024	3.15873	1.34205	0.189318	0.372555	-5.48525
ACAA1	3.043	3.44265	3.10481	3.31075	3.26712	2.99221	3.08409	2.98493	2.97048	2.47653	2.9443	3.39098	2.91104	3.2117	3.2192	3.19999	3.21088	3.32669	3.03402	3.277	3.21647	3.32669	3.20318	3.44907	2.92333	3.18428	3.1745	3.25393	3.01471	-0.0948531	3.14305	-1.19945	0.23943	0.432323	-5.65756
ACAA2	3.49596	3.96171	3.6497	3.54224	3.23467	3.16372	3.87037	3.07122	3.40394	2.89854	3.7948	4.08328	2.50529	3.16169	2.85225	2.76349	3.18428	3.89415	3.52279	3.0622	3.19999	3.68404	3.27884	2.84427	3.41319	3.99524	3.46182	3.95427	4.35968	-0.224277	3.4244	-1.39508	0.172897	0.352847	-5.41678
ACACB	2.74725	3.21859	3.07394	2.79666	2.8702	2.97349	3.6005	2.67376	2.87128	2.85711	3.02828	2.52797	3.58281	2.85849	4.44858	3.18363	3.55975	3.35455	3.69559	3.26999	3.55797	3.0824	2.4889	2.85518	2.931	2.9852	3.74167	3.18738	3.22081	-0.0874195	3.14631	-0.56308	0.577427	0.733622	-6.20368
ACAD10	2.45962	3.01336	3.15332	2.85869	2.74149	3.02346	3.16233	3.02002	2.99193	2.91359	3.20415	3.51178	2.75664	2.86774	2.76139	2.92028	2.57808	2.95232	2.75605	3.14868	3.17546	2.97844	2.7362	3.42545	2.61759	2.42239	2.92542	2.95477	3.08075	0.00639516	2.93488	0.0651863	0.948444	0.971425	-6.35958
ACAD8	3.13928	3.28215	3.27773	2.84019	3.00098	3.1233	2.72456	2.53254	2.78165	2.70248	2.88083	3.28325	3.56635	3.82154	3.77562	3.45714	2.79738	3.03655	3.01822	2.6624	3.16111	3.18704	3.06274	3.16912	2.31666	2.35921	2.73849	2.54128	3.22771	0.243502	3.01612	1.82468	0.077691	0.214723	-4.77954
ACADM	4.25785	4.61256	4.35968	4.02575	3.77899	4.1914	3.6808	3.53838	4.1587	3.29391	4.31593	4.28113	3.2532	3.5323	3.73526	3.94057	3.78808	4.2552	3.72228	3.6808	4.08328	4.23223	3.34608	4.16577	3.69743	3.88654	4.03498	4.06115	4.24022	-0.0243498	3.93622	-0.187526	0.852469	0.919769	-6.3441
ACADS	2.64474	3.16233	2.70732	2.73417	2.76044	2.61465	3.13113	1.95847	2.12445	2.09749	2.53276	3.23467	2.53725	3.20445	3.05338	2.45256	3.09046	2.99036	2.62362	3.12291	2.9663	2.93942	3.44848	2.95131	2.6869	3.20958	2.72305	3.21501	3.1332	-0.292567	2.82934	-2.29595	0.0285943	0.111215	-3.92821
ACADSB	2.32222	2.62116	2.18001	1.96576	2.01654	2.02106	2.10386	1.98537	1.96316	1.93148	2.24992	2.64149	1.81718	2.36066	2.33137	2.09622	2.0885	2.30675	1.95847	2.13468	2.46027	2.15292	2.41561	3.20385	2.08419	2.49684	2.2799	2.50941	2.48988	-0.215811	2.24789	-2.1005	0.0439074	0.146105	-4.29897
ACADVL	3.62529	4.31973	3.64571	3.63295	3.39581	3.50772	4.23753	2.59709	2.87702	2.7095	3.39187	3.7322	3.61509	4.02259	3.83748	3.85455	4.23223	4.19908	3.94929	4.44007	4.06503	4.06888	4.38278	3.40684	3.65661	4.23753	3.65954	4.23489	4.16343	-0.436645	3.7827	-2.76002	0.0096127	0.0550605	-2.96031
ACAP2	2.61879	2.62024	2.76501	2.28519	2.7922	2.45015	2.45583	3.22915	2.95903	2.96086	3.14449	2.43186	2.96115	2.42447	2.59506	2.74579	2.51308	2.56207	2.78058	2.54205	2.49322	2.52695	2.36032	2.87492	2.15734	2.35223	2.80921	2.39648	2.17682	0.200397	2.62016	2.04455	0.0494622	0.158657	-4.40062
ACAT2	1.59178	1.48275	1.18753	1.58519	1.74091	1.37019	1.37954	2.24434	1.72395	2.15227	1.80483	1.80125	1.5038	1.69654	1.34755	1.59332	1.61804	1.60819	1.66325	1.88417	1.65145	1.67012	1.98692	1.93975	1.72543	2.08504	2.26802	2.3792	2.21241	-0.286136	1.75509	-2.80274	0.00865534	0.0516385	-2.86569
ACBD3	2.63419	2.92384	2.67747	2.67552	2.85684	2.44118	2.55501	2.16034	2.54328	2.34402	2.56304	2.80128	2.96245	2.95477	2.78362	2.82249	2.76776	2.46751	2.44118	2.3887	2.62362	2.89495	3.04851	2.78614	2.73897	2.61405	2.28957	2.37485	2.63477	0.0659663	2.64724	0.753671	0.456727	0.6424	-6.07976
ACE2	3.69486	5.00987	3.07313	4.14031	2.80293	4.14474	3.07177	3.06935	3.15983	3.1062	4.73762	2.23412	2.59332	3.58202	4.14031	3.69829	4.22627	1.7148	1.60403	2.63393	2.48385	2.67665	2.6955	2.6649	1.42906	2.65847	2.3975	2.4853	3.77351	1.12315	3.09319	4.44655	0.00010399	0.00386565	1.23803
ACKR1	2.9561	2.43846	2.69964	2.57784	2.88052	2.35843	2.3436	3.74048	3.93912	4.29884	1.26611	1.86515	3.79791	2.73022	3.02744	2.14288	2.19267	3.06415	3.52469	2.74368	3.34657	3.61785	4.07294	1.22521	3.72784	4.14031	1.90446	2.88777	2.80375	-0.308538	2.9074	-1.05791	0.29826	0.496918	-5.81112
ACKR3	2.70496	3.20923	2.28477	2.69464	2.92984	2.77209	2.8311	2.11421	2.73564	1.94526	2.48661	2.95367	3.08795	2.88569	2.89724	2.551	3.69829	3.52161	3.29591	2.54811	3.53311	3.74167	4.21224	2.73667	3.54728	3.72421	2.36559	3.51504	2.33808	-0.504732	2.96075	-2.79668	0.00878564	0.0521307	-2.87918
ACO1	3.54085	3.51995	3.53311	2.98175	3.22524	3.46227	3.24214	2.79895	3.21207	2.85175	3.21324	3.91008	2.91796	3.2756	3.06055	3.35338	3.22739	3.62819	3.57044	3.64805	3.38306	3.34566	3.6364	3.69914	3.55146	3.14052	3.16169	3.21367	3.55146	-0.206326	3.33986	-2.11842	0.0422481	0.142297	-4.26596
ACOT11	2.26802	2.3088	2.27821	2.36109	2.11038	2.3991	2.54361	1.86749	2.10719	2.13112	2.54811	3.35673	2.72704	2.57076	2.65652	2.65518	2.65706	2.35179	2.26047	2.71456	2.98888	2.61825	3.05781	3.15332	2.48162	1.58714	2.74691	1.52885	2.8292	-0.0826615	2.47811	-0.536329	0.595556	0.745025	-6.21827
ACOT13	2.94542	3.04028	3.5067	3.38436	3.54615	3.25807	3.39275	3.21681	2.7922	2.89495	3.02002	3.59835	2.88681	3.3295	3.1784	3.23884	3.52532	3.69994	3.67545	3.99524	3.3589	3.63707	3.56154	3.36198	3.72519	3.11878	3.68689	3.44172	3.51676	-0.344078	3.36325	-3.6766	0.000888482	0.013408	-0.773171
ACOT7	2.321	2.47933	2.32222	2.32306	2.50906	2.2594	2.65847	2.92941	2.14686	2.33086	2.29573	2.30335	2.52083	2.10386	2.21498	2.04512	2.41412	2.51911	2.01098	2.3183	2.0865	2.50995	2.87264	1.9207	2.7492	2.71672	2.57784	2.42447	2.83427	-0.0983306	2.40408	-0.986033	0.331743	0.530653	-5.88227
ACOT8	2.93816	2.71007	2.71504	2.83778	2.6442	2.83212	2.92561	2.40667	2.49548	2.2594	2.68134	2.90414	1.84657	2.64002	2.71642	4.49197	2.50016	2.84216	2.65958	2.80532	3.04333	2.72546	3.48658	2.75318	2.38988	2.79666	3.24904	2.75928	2.91922	-0.131192	2.79224	-0.814435	0.421602	0.61111	-6.03298
ACOX1	2.57014	2.63393	2.69652	2.52629	2.3542	2.55331	2.64249	2.29935	2.17419	1.87399	2.24579	3.09844	2.03804	2.36929	2.19426	2.3101	2.17241	2.4167	2.50804	2.1645	2.70704	2.83456	2.62141	2.51027	3.1054	2.98774	3.1784	2.90172	3.32052	-0.374139	2.55204	-3.2098	0.00308305	0.027826	-1.92474
ACOX2	2.70762	3.26042	2.93043	2.80921	3.38027	2.90848	2.9318	2.97293	2.56924	2.92384	3.20764	3.57541	2.4353	2.95817	2.72354	2.51164	2.94277	2.46027	2.74776	2.72305	3.02458	3.13494	2.88543	2.99889	3.08576	2.19774	3.15926	2.03893	3.91799	0.0618448	2.9008	0.432815	0.668143	0.798637	-6.26814
ACP1	3.20223	3.12955	3.20732	3.24127	3.31705	3.19971	3.10803	2.96826	3.4684	3.31543	3.05561	3.31075	3.05781	3.20992	3.13198	2.74252	2.93157	3.19322	2.88236	3.15398	3.36336	3.29073	2.92616	3.18937	3.20732	2.90563	3.05198	3.13651	3.25011	0.0235613	3.14304	0.34083	0.735529	0.840686	-6.30362
ACP6	3.11051	2.67406	3.11452	3.03014	3.08156	2.14746	2.91762	2.83701	1.15273	3.15178	2.8839	3.21788	2.77719	3.21953	3.02259	3.30483	2.00075	2.86678	3.12094	3.26197	3.17753	2.9108	3.71073	3.44416	2.39946	3.28931	2.9205	3.54615	2.34928	-0.280543	2.91868	-1.54893	0.131538	0.29752	-5.20512
ACSL1	4.04274	4.58581	3.96063	3.38142	3.19067	4.35339	3.78002	3.23316	3.45923	3.31929	4.29577	4.09415	3.85455	4.24648	4.38741	4.33839	3.43323	4.77837	3.82251	4.17895	4.2552	4.16806	4.65272	3.29927	3.56436	3.45815	4.24965	3.60386	3.53037	-0.083672	3.91441	-0.492043	0.626152	0.768993	-6.24089
ACSL3	2.80764	2.87726	3.1054	2.72627	3.01471	2.95507	2.9435	3.2985	3.06025	3.26632	2.89927	3.45248	2.56798	3.02346	2.95394	2.84864	3.17586	3.09986	3.26402	2.99539	2.89517	2.8375	2.86465	3.22239	2.84505	2.43215	2.73469	1.99082	3.37684	0.118744	2.94949	1.07573	0.29034	0.489254	-5.79277
ACSL4	2.29748	2.20108	2.05201	1.83901	1.92424	1.75013	1.34755	1.90926	1.777	1.83789	2.35145	1.7148	1.79194	2.21299	1.99994	1.92674	1.98768	1.84451	1.59178	1.66683	1.69493	1.79583	2.14288	1.91321	2.27078	2.19102	2.13652	2.3837	2.30207	-0.0579631	1.96053	-0.590554	0.559096	0.720064	-6.18798
ACSL6	1.73353	1.6719	1.59589	1.79447	1.60819	1.64749	1.65692	2.23506	2.1656	1.9361	1.87062	2.02891	2.45479	1.773	1.69493	1.39513	1.62157	1.77551	1.82788	1.69654	1.79698	1.75555	1.85701	2.46483	1.73118	2.14686	2.95449	1.59589	1.85992	-0.138509	1.87403	-1.1526	0.257878	0.454348	-5.71035
ACSM3	2.62341	2.44689	2.19836	2.71379	2.01432	2.37837	2.88515	1.8291	2.77928	1.23317	2.71296	1.88186	3.77562	4.14249	3.84554	3.82335	2.93204	2.22222	1.91982	2.25095	2.2203	2.13404	1.52071	2.91922	1.42176	1.16164	1.8519	2.26654	2.95282	0.64841	2.45026	2.56772	0.0152751	0.0745037	-3.37525
ACSS3	2.90848	2.46826	2.56304	2.75664	2.36929	2.6326	2.52797	2.05422	2.63667	1.80992	2.25893	2.89634	2.46277	2.74776	2.84324	2.52729	2.41994	2.74753	2.68579	2.65013	3.117	2.44751	2.71296	3.08989	3.46434	2.53099	3.17514	2.67602	2.8272	-0.321158	2.65544	-2.9045	0.00672298	0.0440825	-2.63697
ACTA1	6.8633	6.65891	6.8633	6.8633	6.40331	6.65891	6.8633	6.29752	6.19754	6.19754	6.29752	6.19754	5.79593	6.01864	6.19754	6.19754	5.68045	5.94051	5.00987	5.73277	6.19754	6.8633	5.86745	6.10864	4.04093	6.01864	5.23293	5.68045	6.10864	0.634297	6.1053	3.29449	0.00247061	0.0238447	-1.72094
ACTA2	4.18386	4.11091	3.92627	5.04478	4.87053	4.573	4.31973	4.32259	4.55864	4.04675	4.41671	4.18185	3.28894	3.85564	3.48318	3.53441	3.18503	3.54439	4.08328	4.02696	3.68157	3.71475	4.03691	4.26861	2.50498	4.64457	3.47623	3.94929	4.73762	0.222833	4.01972	1.12797	0.267977	0.465474	-5.73732
ACTC1	4.8549	4.95646	4.97369	4.8958	4.95646	4.8549	4.98887	4.81824	5.20097	5.14564	5.30508	4.62906	4.49197	4.36397	4.95646	4.94338	4.41671	4.84176	4.77837	4.97369	4.92512	5.02671	4.1869	5.51918	2.41094	4.62906	5.86745	2.55996	4.26609	0.369027	4.7151	1.4849	0.147659	0.321115	-5.29554
ACTG1	3.46379	4.0118	3.82154	4.1705	4.50264	4.05739	3.94057	4.68458	4.35968	4.38741	4.14474	3.76629	3.83619	3.50624	3.12595	3.4827	3.18393	3.86124	4.16806	3.70605	4.07727	4.02696	3.78469	2.49425	4.53306	4.55864	3.24979	4.42678	2.74028	0.106329	3.86459	0.539586	0.593334	0.744123	-6.21653
ACTG2	3.80038	3.7611	3.61575	4.77837	4.092	4.00183	4.2552	5.00987	3.68787	4.18938	4.31973	2.85745	3.7641	3.08042	3.61645	3.44803	3.56829	4.00661	3.83619	3.9937	3.94494	3.96884	4.05218	2.63504	4.82954	4.0329	3.82665	3.76019	3.78469	-0.0159825	3.87992	-0.0854884	0.932422	0.963404	-6.35805
ACTL6A	1.76101	2.24298	2.34756	1.57163	1.81605	1.55958	1.6549	1.81845	1.71781	1.59178	1.82411	1.94526	2.10319	2.25794	1.97384	2.2246	2.51754	2.0652	1.98027	1.93334	1.87623	2.24625	2.63206	2.46456	2.1645	2.38804	1.81605	2.24872	2.12194	-0.224477	2.02984	-2.14506	0.0398858	0.136533	-4.21655
ACTN2	4.74539	4.63567	4.62906	4.32998	3.98303	4.35655	4.63567	3.95427	3.9671	3.82783	4.13602	4.19649	4.00661	4.49197	3.60458	4.13372	4.33839	3.98965	4.11091	4.13815	4.58054	4.50718	4.29291	4.55864	3.84453	4.28371	3.7088	4.00505	4.21977	0.0470142	4.21421	0.41238	0.682896	0.809373	-6.27675
ACTN4	3.08965	2.97681	2.82666	3.27112	3.12066	3.3624	3.07653	3.04819	2.99371	2.98858	2.43186	2.40589	3.21647	3.21029	3.15759	3.0838	3.61645	2.65401	3.4284	2.97462	3.00857	2.92815	3.58144	2.59868	3.30377	3.36532	2.44917	3.24163	2.2553	0.0691451	3.02296	0.534573	0.596755	0.746183	-6.2192
ACTR10	3.74167	3.90888	3.95072	3.88654	3.92338	3.89694	3.88513	4.17591	3.90258	3.56829	4.19377	3.79237	3.44172	3.46643	3.45542	3.25011	3.61704	3.77562	3.84554	3.92338	3.80494	3.81923	3.56909	3.47011	3.50573	4.26609	4.05058	3.22111	3.51739	0.0373187	3.75261	0.361612	0.720093	0.831745	-6.29634
ACTR1B	2.92302	2.82947	2.59678	2.83849	2.56987	2.84349	2.95903	2.13112	2.38297	2.41789	2.23784	2.67008	2.95131	3.35158	3.04053	2.97375	3.07373	2.87843	3.0622	3.04912	3.06415	2.73742	3.37031	2.84449	2.50869	2.83369	3.00147	2.88083	3.2003	-0.200185	2.83524	-1.85283	0.0734387	0.207708	-4.73291
ACTR2	2.7113	2.55883	2.86926	2.32222	2.20757	2.32549	2.63114	3.56095	3.38994	3.21324	3.38618	2.22268	2.67195	2.34666	2.29624	2.99651	2.04761	2.6559	2.47867	2.14123	2.65033	2.9384	1.74248	2.48957	2.53945	2.41373	2.70193	2.06784	2.59742	0.240223	2.59223	1.58334	0.123484	0.285563	-5.1552
ACTR3	3.40875	3.31705	3.48217	3.24189	3.48064	3.29357	2.95232	3.67615	3.09292	3.00206	3.36198	2.88438	3.09257	3.17045	3.07546	3.30736	3.15057	3.29891	3.15894	3.05714	3.33968	3.47906	3.45658	2.84529	3.38829	3.20701	2.97433	3.38696	3.10102	0.0102873	3.23047	0.125675	0.9008	0.946653	-6.3538
ACTR6	2.09129	2.49878	2.05706	1.62722	2.40231	2.0337	2.16034	2.00892	2.00153	1.96669	2.27218	2.33639	2.24828	2.45755	2.4509	2.26705	2.16159	1.6289	1.80483	1.85606	1.92511	1.81605	2.47107	2.54925	2.23019	1.74667	1.90316	1.73513	2.20972	0.18925	2.10062	1.9256	0.0633601	0.188234	-4.60977
ACVR1	2.81842	2.73254	3.0115	2.95903	2.92408	2.78135	2.87264	2.14348	2.6869	2.30159	2.43327	2.31098	3.34693	3.0376	2.97484	3.06415	2.81414	2.57146	2.62809	2.57546	2.57808	2.73791	2.91683	2.91638	2.28519	2.50557	3.37633	2.92665	2.78505	0.0436771	2.75919	0.387423	0.701087	0.818449	-6.28669
ACVR1B	3.25045	3.01979	3.0888	3.39275	2.95669	3.19032	3.25082	1.87399	3.45038	3.17075	2.92333	3.02964	2.94001	3.1499	3.34048	3.39496	2.7087	3.61932	3.15825	3.19393	3.02291	3.27773	3.09449	3.02768	3.7456	3.48601	3.6399	3.31038	2.45196	-0.185771	3.14345	-1.40547	0.169814	0.3493	-5.40309
ACVR2A	3.16018	3.0684	3.12503	3.08938	3.25011	3.12717	3.22771	3.50209	3.66334	3.51178	3.3835	3.27654	2.92888	2.78288	2.5673	2.98228	3.13042	3.16818	3.13373	3.0874	3.09449	2.96773	2.67939	3.92495	2.86973	2.80473	2.89748	2.72809	2.75442	0.15416	3.09956	1.38825	0.174946	0.354974	-5.42573
ACYP1	1.5807	2.32748	2.29522	2.07919	2.45547	2.02481	2.20061	2.35624	2.17902	2.1635	2.25794	2.48339	2.26599	2.23865	2.22516	2.10649	2.27259	1.83789	2.2043	2.21498	1.73236	2.37317	2.37959	1.98279	2.4373	2.15227	2.4667	2.0462	2.35843	0.0244473	2.1965	0.286566	0.776349	0.870483	-6.32062
ADA2	3.60744	4.24022	3.59367	3.98303	3.86124	3.90761	4.09023	4.4309	3.86246	4.51149	3.27853	4.11091	4.00183	2.9864	4.08328	3.81817	4.39225	4.27863	3.9465	2.87975	2.67036	2.80694	2.57986	3.69637	3.38518	3.42051	3.04721	2.92302	2.01575	0.789533	3.60034	4.32447	0.000146899	0.00450579	0.912726
ADAM10	2.85684	2.68308	2.9702	2.43691	2.5135	2.39284	3.06334	2.75096	2.36805	2.58035	2.60837	2.20578	2.49983	2.31748	2.09068	2.76044	2.68547	2.40494	2.58944	2.60359	2.60409	2.7925	2.60721	2.61465	3.42545	2.60906	3.0745	3.29047	2.77119	-0.20672	2.66108	-1.93114	0.0626445	0.186974	-4.60025
ADAM19	4.21224	3.90761	3.3835	3.62819	3.18536	3.49053	3.36418	2.61702	3.10346	2.51027	3.5051	3.56233	2.72658	2.72969	3.04451	3.25742	2.7959	3.00945	3.33407	2.70193	3.18428	3.69559	4.56512	2.6602	2.90713	4.54079	3.71286	4.55864	2.72889	-0.22988	3.33182	-1.08017	0.288391	0.486876	-5.78815
ADAM21	2.15477	2.17837	2.06673	2.22557	2.09749	2.08003	2.0497	2.14636	1.11454	3.53095	4.30958	2.08781	2.73043	1.98027	2.20757	2.14636	2.1486	2.31938	2.14424	2.1841	2.25893	1.91808	2.00237	1.81845	1.49805	2.28857	3.27152	1.65355	2.6409	0.142615	2.25011	0.65541	0.517034	0.688999	-6.148
ADAM23	2.85897	2.95025	3.22471	2.87772	2.59532	2.96189	3.39658	1.98027	2.93298	1.9715	2.22122	3.08208	3.64507	3.30411	2.80587	3.26154	3.18965	3.25507	3.117	3.29155	3.39623	3.16592	3.17012	3.32911	3.22834	3.23467	3.29482	3.15119	3.13815	-0.333382	3.03558	-2.46743	0.0193274	0.0873174	-3.58409
ADAM9	3.1745	3.22239	3.59504	2.74368	3.31588	3.043	3.20958	3.83748	3.8252	3.48846	3.43634	4.04866	1.86094	2.04296	1.7742	1.74091	2.36689	3.60934	2.56339	2.78312	3.15797	3.73831	1.94723	4.72833	3.15236	3.85315	3.26402	3.5179	3.91516	-0.368636	3.13643	-1.39382	0.173275	0.352958	-5.41844
ADAMDEC1	1.85091	1.32084	1.3101	1.46924	1.58276	1.53101	1.54678	3.37305	1.48275	1.92773	2.57247	1.18753	2.74947	3.12444	1.69984	3.84911	1.72085	1.51813	1.53101	1.83789	1.5662	1.69787	1.88307	1.44669	1.4116	1.43957	1.74667	1.48275	1.39912	0.437535	1.83653	1.94781	0.0605339	0.182876	-4.57146
ADAMTS1	2.64149	3.12595	2.87156	3.32286	3.29816	3.34282	2.95559	3.31349	4.28113	2.86443	3.52469	2.58602	2.26193	2.59136	2.26193	2.81761	3.0361	3.16537	3.48493	2.43955	4.35339	3.08663	2.60024	2.61496	4.46711	3.52532	3.36384	4.07517	2.44088	-0.295737	3.12808	-1.3861	0.175596	0.355831	-5.42854
ADAMTS3	1.79698	1.60646	1.7742	1.85701	3.04885	2.00237	1.72085	2.5298	2.72202	3.27523	3.03014	1.00386	1.82672	1.753	1.50021	1.52372	1.69654	1.81718	1.51266	1.58519	1.79583	1.71781	1.81718	1.34383	3.01949	2.50207	2.84477	2.29573	1.73947	0.0400244	2.02273	0.186488	0.853276	0.920094	-6.3443
ADAMTS5	2.33267	1.93788	2.37837	3.27801	2.37559	2.45998	2.97433	3.36156	1.93516	3.58467	2.16613	3.71812	2.93788	2.91104	2.74084	2.08504	3.01279	3.04391	3.31075	3.75414	2.40146	1.25991	2.56758	2.71898	2.32142	2.68462	1.69984	3.34726	2.00729	0.123965	2.66577	0.550067	0.586211	0.739614	-6.21087
ADAMTS9	2.35385	2.28157	1.95847	2.24349	2.4948	2.30923	2.37884	1.7742	1.85494	1.2853	2.29212	2.7788	1.40386	2.47523	1.89822	2.16159	2.32306	3.05285	3.01892	2.53099	3.20764	2.64351	3.93075	1.56403	5.41546	3.97708	2.13112	3.93768	2.22081	-1.00252	2.54822	-3.83982	0.00056831	0.0105408	-0.35634
ADAMTSL3	2.50804	3.11544	2.95975	2.9121	3.36988	2.78288	3.16791	2.99721	3.1527	3.57938	3.35929	3.41319	2.69089	2.42907	2.95669	2.72704	2.71081	2.4729	3.10747	2.65168	2.80344	2.62141	2.45196	3.37847	2.15425	2.6949	2.7788	2.99371	2.43955	0.277755	2.8752	2.28121	0.0295535	0.112775	-3.95698
ADAP1	3.52829	2.92333	2.92763	3.33481	3.12649	3.32995	3.20992	3.87477	3.422	3.49168	3.08712	2.83849	3.59763	3.38887	3.81183	3.7088	3.01052	3.38068	3.26042	3.29665	3.37896	3.35599	3.21291	3.4469	2.34319	2.45861	2.58991	2.73417	3.3448	0.263195	3.22122	2.00609	0.0536309	0.167401	-4.4693
ADAP2	2.46826	2.2926	2.89665	2.77398	3.02477	2.98663	2.77094	3.90408	3.44081	3.23849	3.0684	2.75964	3.5067	2.79404	2.89005	3.85315	2.59562	3.20732	3.34811	2.53036	2.70672	2.92485	2.92888	1.93045	2.5226	2.49742	2.15094	3.01657	1.88862	0.377841	2.85923	2.27511	0.0299596	0.113632	-3.96887
ADCY1	2.35624	2.37398	2.20757	2.47076	2.25763	2.33846	1.93045	2.17531	2.49915	2.62664	1.71781	2.33602	2.56758	1.97618	2.67972	1.69654	2.25228	2.49915	2.70337	2.32021	2.45403	2.39616	2.36311	2.86065	3.28408	2.21564	2.65141	2.81602	2.59332	-0.333939	2.40067	-3.05513	0.0045939	0.0349295	-2.29019
ADCY3	2.17634	2.0188	2.15794	2.42558	2.16795	2.37485	2.20972	2.74633	2.41094	2.35268	1.94526	1.73353	2.53885	2.26751	2.37485	2.58856	2.08223	2.54456	2.64618	2.42479	2.29986	2.44648	3.19002	1.74091	2.7352	2.84707	2.19204	2.98493	2.24298	-0.255649	2.37472	-2.18255	0.0367596	0.129073	-4.14622
ADCY6	4.19649	3.78319	3.68502	3.90258	3.63707	3.89841	4.04866	3.42788	3.49009	3.51555	3.54224	3.43784	3.73928	3.90408	4.03893	3.46785	3.44215	3.69914	3.88093	4.0191	3.96171	3.62463	3.70708	4.05391	4.33271	3.25867	3.31113	3.66506	4.1068	-0.0866025	3.75097	-0.824501	0.415948	0.605636	-6.02489
ADCY7	1.79968	2.11682	2.24579	2.36559	3.33762	2.3505	2.31791	4.12916	4.21664	3.84554	3.53715	3.31463	3.15057	1.57846	2.41001	2.43427	1.87175	2.351	2.97742	2.01019	2.22876	1.58714	1.74907	1.91113	1.70141	2.06784	1.61388	2.12687	1.58276	0.773717	2.44585	3.14463	0.00365055	0.0307673	-2.07983
ADCY9	2.82862	2.98467	3.1846	3.13651	2.85097	3.03503	3.33929	2.99274	3.11544	3.0305	2.63033	3.59367	2.66924	2.98918	2.19267	2.71565	3.0763	3.46952	3.25705	3.50573	3.42499	3.09954	2.84427	3.11943	3.64507	2.74392	3.56909	3.342	4.10414	-0.381057	3.12035	-3.07629	0.0043519	0.0336829	-2.24073
ADD2	2.94967	2.557	2.78563	2.96461	2.92888	3.05746	3.008	2.92786	2.62116	2.968	1.73798	3.36709	3.53372	3.19755	3.07373	3.19364	3.38784	3.19786	2.85175	3.18809	2.77209	3.07733	3.06439	2.40553	2.96488	2.83007	3.05388	2.73718	2.41917	0.0762748	2.9249	0.585756	0.562276	0.722453	-6.19077
ADGRA2	2.47139	2.63667	2.41094	2.64249	2.72331	2.58653	2.45722	2.92459	3.23743	3.29316	2.52289	2.68256	3.44907	2.50529	2.91297	3.40567	2.78362	2.50906	2.70157	2.56175	2.71162	2.57397	2.66901	2.84835	1.93148	2.03506	2.2312	1.89529	2.24792	0.393004	2.64007	3.14828	0.00361628	0.0306204	-2.07118
ADGRA3	2.32467	2.73945	2.72684	2.44451	2.73945	2.57808	2.66648	2.36066	2.62421	1.97	2.34249	2.68195	2.2246	2.29212	2.38035	2.75237	2.52417	2.70415	2.95507	2.4642	2.69112	2.76349	2.36358	3.10803	2.83478	3.05059	3.17546	3.3356	2.9369	-0.372753	2.64674	-3.88095	0.000507387	0.00957364	-0.25035
ADGRB3	1.52885	1.4153	1.57382	1.7148	1.99994	1.63109	1.7873	1.90549	1.61971	1.85386	1.64749	1.94348	1.6861	1.90926	2.39387	2.09204	1.95592	1.77854	1.94526	1.74404	1.86094	1.80256	2.2081	2.07562	2.33267	1.99994	2.3198	2.21498	1.56199	-0.183605	1.87941	-1.96518	0.0583988	0.178203	-4.54124
ADGRG1	2.78264	3.02991	2.8292	2.45196	2.39284	3.1062	2.85952	2.52391	2.78416	2.80977	2.45445	2.95926	2.61854	2.58411	2.69906	2.77119	2.70927	3.18536	3.19874	3.40828	3.18904	3.10803	3.06087	2.29442	4.21977	4.04866	2.37281	3.44803	3.06114	-0.488853	2.92969	-3.44795	0.00164557	0.0183879	-1.34552
ADGRG6	2.05201	1.94348	2.12634	2.05635	1.97543	2.1698	1.66524	3.29316	2.97152	4.00982	2.94398	2.42045	3.59428	1.97058	3.09292	1.74667	2.30923	2.08585	2.11421	2.16613	2.07162	1.38329	1.68321	1.43616	1.61804	1.44282	1.72263	1.23317	2.01019	0.743388	2.18305	3.61983	0.00103655	0.0145386	-0.916614
ADGRL1	3.0587	2.68579	2.69279	3.02089	2.92247	2.88159	2.91683	2.26241	2.59868	2.33446	1.92238	2.17241	2.75928	2.80236	2.78885	2.57485	2.96686	3.13404	3.05536	3.01202	2.79271	2.98493	3.55736	2.96273	3.19971	3.12977	3.60386	3.63498	3.15082	-0.516528	2.88207	-4.56825	7.36e-05	0.0031849	1.564
ADGRL2	3.04416	2.79325	3.26083	2.85653	2.95025	2.93382	2.80822	2.81735	2.87371	2.98547	3.31113	3.01843	2.49393	2.72375	2.86847	2.91159	2.93663	3.09206	2.66856	3.16851	3.00912	2.89431	2.39467	3.64315	2.85518	2.50079	3.21207	3.11193	3.08291	-0.0525243	2.93865	-0.531129	0.599111	0.748443	-6.22103
ADGRL3	2.22753	2.89431	3.01596	2.3373	2.07488	2.06784	1.88417	1.59997	2.53667	2.09687	1.98203	3.6526	2.17837	3.58015	2.65847	2.90307	3.40778	2.04129	1.97855	2.20867	2.44118	2.74552	2.60998	2.19598	1.90144	1.84134	2.18862	1.52643	2.67495	0.339012	2.39489	1.78189	0.0845561	0.226966	-4.8493
ADGRL4	2.32592	2.47363	2.56148	2.28033	2.17035	2.53315	2.32183	2.52229	2.29573	2.718	1.98027	2.87179	2.12	2.18804	2.23959	2.19729	2.69112	2.45652	3.09449	2.50047	2.47523	2.94301	3.0052	2.03967	3.32052	3.10803	1.80369	3.46084	2.78714	-0.367754	2.53399	-2.7053	0.0109837	0.0593599	-3.08025
ADH1A	1.98027	1.77163	1.84228	2.28288	2.12445	1.93975	1.96924	3.10205	3.60596	2.95208	3.18608	1.85494	2.87422	2.19426	1.83269	2.23784	1.96476	2.212	2.08781	2.321	1.84015	2.26471	0.266263	2.09812	1.50931	1.17074	3.67798	2.97096	2.07433	0.295085	2.21409	1.18587	0.244675	0.43932	-5.67306
ADH1B	2.68279	2.52417	2.44617	3.68404	3.63371	3.26402	3.67545	4.26345	4.69933	4.14249	4.40827	2.55011	4.03102	2.99588	2.76044	3.47764	3.03655	4.16343	3.8252	4.58581	3.57104	-0.185339	1.4923	3.22142	1.78848	1.0296	4.80845	3.58607	2.59271	0.554707	3.19844	1.38874	0.174799	0.35487	-5.42509
ADI1	2.6409	3.66412	4.06115	3.8587	4.15142	3.71812	3.58607	2.69172	3.63498	2.86228	3.12809	3.4973	3.80245	4.24022	3.63707	3.37068	3.83977	3.539	3.83855	3.83748	3.98303	4.1869	3.47486	3.76019	3.17217	3.72693	3.97372	3.63815	4.12491	-0.219262	3.64279	-1.46836	0.152072	0.327249	-5.31836
ADIPOR1	3.6364	3.32591	3.71186	3.37684	3.30299	3.6115	3.71073	2.61525	2.92984	3.14366	3.16566	2.81761	3.66603	3.9671	3.55608	3.80141	3.75698	3.42276	3.30999	3.59835	3.49544	3.49483	3.68404	3.539	3.06055	3.03282	3.60999	3.22947	3.43826	0.0077793	3.41418	0.065259	0.948386	0.971425	-6.35958
ADIPOR2	3.30411	3.29316	3.18393	3.28102	3.12119	3.42499	3.30299	3.07984	2.83347	3.21501	2.78533	2.86774	3.33516	3.31808	3.43323	3.40684	3.46693	3.17349	3.47103	3.44848	3.22629	3.25281	3.21647	3.12503	3.1688	3.32099	3.02396	3.35045	3.12412	-0.0269436	3.22603	-0.359395	0.721734	0.832758	-6.29713
ADIRF	2.86096	3.25118	2.64838	2.90535	2.80735	2.39467	2.64182	3.45658	2.88109	3.52349	2.24349	1.89822	3.09563	3.88227	2.83263	2.71983	3.81923	2.81842	4.12238	3.41874	2.70819	3.2756	3.31971	2.48069	2.54039	3.24089	3.57609	2.27038	2.3792	-0.079488	2.96596	-0.406605	0.687089	0.811724	-6.2791
ADK	2.3183	2.1452	2.38152	2.30794	2.40063	2.20478	2.32467	2.21939	1.99994	1.88862	2.44718	3.29779	1.76844	2.0885	2.01575	1.93975	1.94629	2.53917	2.36186	2.51576	2.4853	2.28726	2.49613	3.14922	2.74753	2.84155	2.70601	2.62869	2.71054	-0.405086	2.38496	-3.59249	0.00111615	0.0150175	-0.985401
ADM	3.04333	2.19204	2.17944	3.1062	3.02291	3.58144	3.09719	2.76349	3.05561	2.30839	2.63819	2.27436	2.23784	4.05391	2.65268	1.98768	4.05919	2.89665	1.67991	2.95559	2.35715	1.71637	1.73118	2.55763	2.4366	2.28609	4.11332	1.62157	3.16169	0.378988	2.68164	1.56437	0.127873	0.292121	-5.18284
ADNP	3.18579	3.49111	3.17753	3.29891	2.89195	2.97247	3.18579	3.05031	2.99797	3.01052	2.91132	3.15675	3.27773	3.06785	3.05285	2.99797	3.08434	3.1233	3.043	2.88777	2.45861	2.91583	2.69679	3.02964	3.01657	2.7808	2.95533	3.02002	2.97875	0.197669	3.02474	2.84061	0.00788227	0.0485807	-2.78112
ADNP2	2.30379	2.67036	2.5809	2.59017	2.57603	2.53885	2.48957	2.61434	2.61525	2.47396	2.86774	2.40553	2.75157	2.65935	2.81984	2.59271	2.78885	2.3198	2.36971	2.54263	2.44451	2.49455	2.59562	2.81007	2.83212	1.80483	2.58536	1.96316	2.47227	0.171946	2.53701	1.97704	0.0569805	0.174952	-4.52051
ADO	3.10686	2.87975	3.06811	2.7359	2.79895	2.84505	2.70704	3.14868	3.17753	3.29891	3.21291	3.2735	2.3436	2.66742	2.22602	2.52362	2.4488	2.7925	2.63448	2.81928	2.85097	2.68612	2.4579	3.04485	2.5034	2.65652	2.91796	3.03835	3.0661	0.06171	2.82521	0.567539	0.574432	0.73204	-6.20118
ADORA1	2.21661	2.43012	2.47328	2.3227	2.31048	2.1656	2.69821	2.37164	1.62529	2.43012	2.64057	2.34514	2.68983	2.77094	3.24807	2.49455	2.40273	2.48795	2.37526	2.69302	2.59332	2.57926	2.44689	3.35338	2.14123	1.91231	3.58202	1.51813	2.96059	-0.104445	2.49239	-0.648605	0.521365	0.692274	-6.15239
ADPGK	3.08184	2.47681	3.05561	3.03835	3.08606	3.05198	2.89351	3.7641	3.70426	3.63078	3.34048	2.90145	3.62328	2.82811	3.40212	3.18013	2.48385	3.09719	3.27267	2.84049	3.07519	2.76139	2.61586	2.36517	2.65847	2.76747	2.42761	2.76776	2.32424	0.40178	2.98332	3.09373	0.0041616	0.0331093	-2.19983
ADRA1A	2.44751	2.09812	2.36689	2.43147	2.24434	2.34442	2.28902	2.14746	1.53101	2.74691	2.44118	3.01919	2.6331	2.53478	2.60055	2.62923	2.54232	2.68923	2.53819	2.67036	2.55635	2.57784	2.41269	3.35045	2.43803	2.24483	1.84759	2.81952	2.70732	-0.156473	2.47931	-1.2664	0.214793	0.404862	-5.57882
ADRB2	2.83061	2.62255	2.92333	2.77268	2.94455	2.79048	3.02113	3.17249	3.29591	3.22803	2.57685	3.3097	2.48923	2.61133	2.62087	2.4458	2.40032	2.87921	2.99297	2.86034	2.40231	2.54617	2.58439	2.47107	2.91611	3.06907	3.01471	2.79325	2.60137	0.0659017	2.79955	0.639781	0.52701	0.696338	-6.15801
ADRM1	3.18139	3.06055	2.77851	2.99797	3.30217	3.0305	2.83891	2.33352	1.84228	2.2926	2.04378	2.39317	3.35599	4.15479	3.47435	3.57169	3.93202	3.20184	3.18071	3.18213	3.13928	3.59981	3.98163	3.14399	2.83968	3.2003	2.79377	3.17954	2.83503	-0.214269	3.0642	-1.1087	0.276078	0.473975	-5.75806
ADSL	2.91159	3.05746	2.8114	2.96428	2.90391	2.80152	2.88681	2.3975	2.83263	2.81414	2.70601	3.2238	2.77639	2.95131	2.7369	2.64249	2.64474	2.73395	2.99248	2.91732	2.84913	3.01521	3.05561	2.84628	2.69039	3.26743	2.99248	2.97433	3.04132	-0.120766	2.8772	-1.69358	0.100362	0.251737	-4.98905
ADTRP	2.90091	2.44484	2.53071	2.82249	2.55465	2.96577	2.51204	2.79098	3.20258	3.008	2.46483	1.86389	2.87209	3.41687	3.6505	4.31973	2.56339	2.92198	2.36311	2.93634	2.87795	2.83033	2.89086	1.89725	2.83503	3.04912	2.38804	2.27902	1.8088	0.285725	2.75731	1.56582	0.127533	0.291467	-5.18074
AEBP1	3.36875	4.08171	2.79453	4.17591	4.82954	3.67798	3.45714	3.32052	4.62906	4.16343	4.28371	1.54965	4.69158	2.49646	2.99721	3.30188	4.42678	2.05486	2.60055	1.45021	2.91329	2.81285	2.76383	1.86655	2.9435	2.29172	3.51504	2.94455	2.0446	1.14472	3.18784	4.17145	0.000225978	0.00565257	0.507777
AFF1	3.18636	2.84787	3.06499	3.02964	3.09563	2.98774	3.1057	3.19786	3.16851	3.25118	3.18428	2.49613	3.67615	3.25965	3.56829	3.87037	3.04028	2.82779	2.90763	3.00885	2.95507	2.8642	1.92773	3.13896	2.5475	2.46199	2.84988	2.45722	2.75157	0.453407	2.99066	3.8255	0.000591157	0.0107096	-0.393162
AFF2	2.86375	2.23171	2.35921	2.29659	2.35223	2.42661	2.31589	2.1818	1.88951	2.63336	2.27865	2.2766	2.65996	2.93261	2.88681	2.85097	3.23884	2.49983	2.40063	2.74776	2.46385	2.51881	2.89829	2.24251	2.19598	2.4458	2.71698	2.34402	2.18804	0.0384251	2.4944	0.338979	0.736909	0.841366	-6.30425
AFG3L2	3.19097	3.19168	3.24544	3.31737	3.23849	3.32591	3.48493	2.62638	3.1054	2.90535	3.17615	4.10004	2.97987	3.40567	3.29246	3.28894	2.83728	3.45974	3.42233	3.38478	3.61785	3.6323	3.06474	4.10258	3.34608	3.05365	3.11142	3.35929	3.46277	-0.199757	3.30103	-1.7612	0.0880563	0.233063	-4.88256
AFTPH	3.38478	2.92542	3.18866	3.57104	3.33806	3.58807	3.23707	3.74899	3.57896	3.56635	3.41643	3.09416	3.27112	2.97796	3.20155	3.39922	3.30411	3.55859	3.3662	3.47303	3.34523	3.10481	2.97742	3.09719	3.35122	2.93714	2.968	3.22739	3.07148	0.134227	3.28516	1.56143	0.128564	0.293331	-5.1871
AGA	1.693	1.58519	1.90144	1.57846	2.10319	1.5367	1.81951	2.57685	2.13468	2.21142	2.08358	2.14233	1.75013	1.61971	1.63109	2.13342	1.63552	2.00954	1.81365	1.81128	1.97058	1.6861	1.97759	2.09335	1.98361	2.26422	2.08223	2.19678	2.03663	-0.103429	1.93316	-1.07387	0.291163	0.490185	-5.7947
AGAP1	2.16222	2.2321	2.19323	2.45893	2.6028	2.36311	2.44407	1.87062	2.58244	2.33602	1.92872	2.6057	2.6057	2.29624	2.47681	2.46199	2.57216	2.51544	2.47107	2.63283	2.08003	2.46165	2.30504	2.65317	2.66619	2.26992	3.11734	2.4373	2.51724	-0.146316	2.42483	-1.58664	0.122734	0.284311	-5.15036
AGFG2	2.89829	2.68046	2.93234	2.65518	2.22876	2.63336	2.9465	3.05642	2.6582	2.99721	2.27396	2.4642	2.73873	2.84301	3.23177	2.80152	2.90977	2.70819	2.68951	2.76139	2.63175	3.14511	2.83728	2.96577	2.46483	2.1292	2.7621	2.97398	2.70704	0.0303992	2.74917	0.304089	0.76309	0.860627	-6.31545
AGGF1	2.59804	2.54263	2.41058	2.43803	2.56671	2.41166	2.38988	2.84275	2.84155	2.8642	2.89574	2.95722	2.12634	2.3925	2.00402	2.0652	2.50498	2.63142	2.43391	2.39686	2.55331	2.54205	2.46751	2.5746	2.55905	2.69845	2.51204	2.53514	2.58737	-0.020269	2.52909	-0.227035	0.821886	0.899406	-6.33591
AGK	3.08938	3.04104	3.21324	3.14596	3.20482	3.35288	2.89724	3.02909	2.88969	2.61496	2.88411	3.09563	2.90276	3.35085	3.342	3.55975	3.01336	3.26712	3.09016	3.31196	3.31038	3.25118	3.40778	3.96884	2.55792	2.92247	3.27231	2.59136	3.23633	-0.0866273	3.13154	-0.780215	0.441175	0.628667	-6.05975
AGL	3.37633	3.60657	3.42357	2.96547	3.36748	3.50718	3.33516	3.1332	3.12382	2.92147	3.20567	3.62186	2.91535	3.07867	3.18636	3.01382	3.2476	3.34693	3.26303	3.32413	3.64371	3.59008	3.2198	3.68689	3.18866	3.30551	3.45452	3.35455	3.7234	-0.188065	3.31485	-2.25647	0.0312302	0.116517	-4.005
AGO1	2.8032	2.80101	2.61644	2.73254	2.83647	2.86549	2.69141	3.21145	3.00996	2.99427	3.37896	3.1614	2.41412	2.53349	2.44057	2.70627	2.70157	2.91874	2.94455	3.01252	2.92888	2.53036	2.31666	2.83796	2.69195	2.55465	2.93761	2.80945	3.14052	0.0155786	2.81112	0.160684	0.873384	0.931182	-6.34878
AGO2	2.89378	2.73998	2.7084	2.45225	2.31666	2.33086	2.73945	2.01803	2.3975	2.40792	2.68744	2.16854	2.14636	2.44854	2.47139	2.65141	2.45513	2.34279	2.44617	2.29624	2.40032	2.45547	2.56513	2.47681	3.19732	3.13494	2.30923	3.21788	2.4188	-0.132524	2.52741	-1.20931	0.235678	0.427956	-5.64621
AGO3	1.91321	1.81128	2.29573	1.99518	1.98537	1.86655	2.00892	2.09812	2.28157	1.9426	2.26241	1.89147	2.12063	1.9715	2.17726	2.20972	2.24001	1.93699	2.1155	2.03566	2.01263	1.82056	1.78514	2.242	2.42274	2.36186	2.28157	2.46926	1.89914	-0.0522225	2.08464	-0.670655	0.507401	0.681996	-6.13802
AGPAT5	2.09387	2.59742	2.25845	2.14928	2.34083	2.22516	2.20525	2.92223	2.45829	2.70448	2.82811	2.35547	2.15477	1.70699	1.99082	2.09551	1.88862	2.10195	2.10386	1.75125	1.83053	2.23784	2.12986	2.11225	3.41229	2.47715	1.69138	2.54867	1.9153	0.0999863	2.25131	0.704942	0.486104	0.665171	-6.11475
AGPS	2.68101	2.6649	2.36066	2.22122	2.20578	1.96924	2.20636	2.63637	2.47197	2.29893	2.30426	2.23259	2.4188	2.3436	2.37959	2.53917	2.61196	2.10056	2.24434	2.13833	2.44299	2.36517	2.37164	2.54683	2.11164	2.55938	2.12387	2.5034	2.43691	0.0563288	2.36178	0.739754	0.465009	0.649073	-6.08999
AGRN	3.16566	3.28245	3.13776	3.17817	3.18636	3.2855	3.1062	2.98721	2.95208	3.69743	2.60024	3.04104	3.7288	2.97096	3.93202	3.74263	3.59367	3.40517	3.19702	3.05388	3.24127	3.21029	3.43859	3.12838	2.78972	2.64675	2.57838	2.74607	2.85849	0.245395	3.16835	2.01147	0.0530298	0.166	-4.45975
AGT	3.58865	3.3004	4.00661	4.03893	3.87614	3.6808	3.75791	3.25867	3.56697	4.01364	3.59091	3.20125	3.65757	3.64507	3.63371	3.85996	3.60865	3.89694	3.86124	4.28642	3.88227	3.74263	3.5467	3.40352	3.2202	4.26345	3.86659	3.85455	3.52161	-0.11497	3.71145	-1.09071	0.283799	0.482073	-5.77712
AGTPBP1	2.49393	2.42661	2.72331	2.73309	2.3991	2.75371	2.82171	2.88462	2.86579	2.63707	2.61796	2.99797	2.62087	2.45479	2.30288	2.84529	2.42661	3.08938	2.92435	3.14113	3.15301	2.86176	2.56055	3.08576	2.88159	2.90492	3.17954	3.13961	2.86096	-0.334508	2.78579	-4.28004	0.000166513	0.00482977	0.794811
AGTR1	2.12063	2.06455	2.42126	1.98537	2.03125	2.183	2.31497	2.69331	2.7013	3.66265	1.04408	1.64749	3.38306	2.89604	3.47392	1.96576	2.55563	2.14928	2.67495	2.4889	2.26047	2.00805	1.25373	2.07488	1.82056	1.32983	3.90888	2.44648	2.53382	0.174433	2.34807	0.719278	0.477352	0.658829	-6.10469
AHCTF1	1.76844	1.61804	1.68771	1.59589	1.95264	1.82788	1.88951	1.86655	2.05345	2.01263	1.95847	1.74248	1.83053	1.94078	1.99616	2.06588	2.06031	1.8291	1.59332	1.57382	1.85808	1.6589	1.66683	2.33313	2.10056	2.31623	1.84228	2.03435	2.02342	-0.0279502	1.88612	-0.345463	0.732078	0.8394	-6.30203
AHCYL1	2.66712	2.56023	2.49878	2.73103	2.5683	2.71953	2.49223	2.34514	2.32021	2.36358	2.47076	2.40421	2.5135	2.65544	2.49943	2.5673	2.88515	2.72601	2.74422	2.6786	2.7602	2.58244	2.80071	2.63142	3.22587	2.63114	2.80101	3.0305	2.81952	-0.241152	2.64461	-3.50532	0.00141146	0.0168443	-1.20332
AHCYL2	2.51973	2.33086	2.28688	2.43601	2.54361	2.40273	2.44854	3.03976	2.8399	2.8126	2.84427	2.72999	2.21661	2.23019	2.23461	2.26654	1.85606	2.49021	2.44195	2.17634	2.34551	2.33222	2.34442	2.18573	2.02418	2.87752	2.45225	2.87519	2.41712	0.0593227	2.44833	0.558059	0.580808	0.735861	-6.20647
AHDC1	3.12382	3.13627	2.51783	2.90091	2.64249	2.78264	2.84324	2.46483	2.24298	2.41094	2.42414	2.75991	2.59804	2.75129	2.95817	2.85628	2.90248	2.75157	2.95208	2.9718	2.91462	2.78913	3.1054	3.08629	2.93408	3.12534	3.10658	3.15057	2.90038	-0.257834	2.83118	-3.07225	0.00439709	0.0339142	-2.25018
AHI1	3.15332	2.96408	2.77049	3.17075	3.20923	2.98038	3.11261	3.38478	3.33887	2.20917	3.16084	2.27953	2.86705	2.69172	2.9435	2.73022	2.7987	2.71162	2.95079	2.8067	2.95449	2.56481	2.54683	2.99371	3.45596	3.35814	2.70672	3.07263	2.87371	0.0110236	2.92281	0.0952953	0.924693	0.959534	-6.35716
AHR	2.5185	2.62529	2.34279	2.43565	3.23005	2.46127	2.37649	2.97512	2.82666	2.6955	2.81366	2.7686	2.41917	2.30675	2.29573	2.42126	2.65317	2.58035	2.69679	2.29172	2.50309	2.45861	2.3704	2.91359	2.67972	2.47007	2.11038	3.08488	2.39946	0.0513909	2.57671	0.513926	0.610944	0.756982	-6.22995
AHSA1	3.55797	3.36578	3.68689	3.45596	3.23148	3.51178	3.65757	2.92361	3.12868	3.19428	3.15638	3.31311	3.14026	3.43672	3.43913	2.85577	3.24604	3.36578	2.9408	3.39367	3.49988	3.38887	3.35241	3.28516	3.49544	3.01305	3.77351	3.05172	4.00982	-0.0689943	3.3404	-0.684609	0.498672	0.67545	-6.12869
AIFM1	3.38829	3.51394	3.52585	2.99889	3.33516	3.20992	3.46227	3.3295	3.14868	3.05172	3.25432	3.81072	2.61586	3.27523	2.86602	3.03119	3.05948	3.1995	3.48658	3.51739	3.62529	3.71812	3.29009	3.35122	3.57896	3.30411	3.49223	3.54728	3.64805	-0.251838	3.33227	-2.72224	0.0105411	0.0581785	-3.04328
AIMP1	3.15119	3.3295	3.0381	3.011	2.95722	2.968	2.87446	2.99828	2.90792	3.15467	2.9864	3.0587	2.61796	2.97433	2.63707	2.65371	2.83033	3.01499	2.81341	2.98663	3.06274	3.08712	3.11299	3.03788	3.31463	3.13017	2.85518	3.27112	2.84558	-0.0944397	2.98901	-1.30157	0.202645	0.390055	-5.53593
AIMP2	3.13434	3.11452	3.19851	3.4284	3.117	3.24056	3.06195	2.57574	2.97512	2.90391	3.02204	3.87614	2.59742	3.18106	2.90438	3.05536	2.93382	3.28176	3.24635	3.53617	3.27605	3.39316	3.52103	3.32286	3.21088	3.75889	2.9481	3.54153	2.89772	-0.25021	3.1812	-2.39991	0.0225873	0.0962486	-3.72159
AIPL1	2.50832	2.27038	2.32385	2.56607	2.26193	2.29748	2.41094	2.10118	1.73647	2.29312	2.12508	2.1452	2.49188	2.8375	2.80236	2.71186	2.67525	2.57546	2.30426	2.59587	2.4516	2.55827	2.62473	4.82954	2.08994	2.30462	2.61879	2.24434	2.0497	-0.218111	2.47607	-1.17904	0.247345	0.442699	-5.6808
AK1	4.05919	4.40466	4.31973	4.34946	4.16074	4.17307	4.80845	3.18536	3.35374	3.56095	3.7611	3.7641	3.82154	4.13372	4.08171	4.18185	4.34254	4.15142	4.32624	4.66043	4.2437	4.51149	4.68458	4.28642	3.98452	3.76629	5.04478	4.09023	5.14564	-0.380808	4.18475	-2.54312	0.0161893	0.0767654	-3.42697
AK2	2.52041	2.53099	2.54205	2.55966	2.60309	2.58211	2.49742	2.46456	2.3318	2.37002	2.1869	2.29707	2.53697	2.63951	2.71007	2.89495	2.75096	2.64867	2.58152	2.60659	2.6028	2.66052	2.71534	2.68333	2.7113	2.90683	2.56987	2.89168	2.49943	-0.142653	2.58953	-2.16408	0.038271	0.132513	-4.18097
AK4	3.32995	3.27304	3.44803	2.94455	2.41032	2.93075	2.94909	2.74172	2.76585	2.5294	3.17514	3.25244	2.77073	3.12838	3.14957	3.0511	3.15178	2.63584	2.72089	2.50665	2.90621	2.85869	2.77241	3.26812	2.54425	2.69652	2.41712	2.50238	3.17217	0.250004	2.89666	2.3962	0.0227804	0.0966705	-3.72908
AK6	2.57429	2.74897	2.92561	2.96963	2.88186	2.83323	2.75928	2.2203	2.62778	2.68195	2.66269	3.30896	2.32795	2.76501	2.25478	2.13404	2.57429	2.87179	2.78337	3.00049	2.76409	2.87726	2.98467	2.66596	3.42357	3.54728	2.66133	3.57286	2.94455	-0.346301	2.8051	-2.98818	0.00544636	0.0392564	-2.44548
AKAP1	3.13198	3.55736	3.16761	3.24397	3.18704	3.18636	3.4006	2.55265	3.21716	2.90792	3.43323	3.7499	3.23577	3.80618	3.34324	3.05561	3.0584	3.6364	3.33286	3.61065	3.84328	3.46277	3.72519	3.45714	3.20828	2.59532	3.76716	2.83728	3.5521	-0.169919	3.31943	-1.38181	0.176898	0.356934	-5.43414
AKAP10	3.02204	2.70337	2.31048	2.59868	2.70762	2.57899	2.60082	3.08409	3.12444	2.7013	2.21604	2.42203	3.53037	2.97987	3.98303	3.21055	3.11359	2.57247	2.50111	2.54039	2.81952	2.27172	2.51783	2.78058	2.25997	1.54678	2.07778	2.08994	2.25893	0.522638	2.65946	3.48562	0.00148797	0.0174145	-1.25226
AKAP11	2.68819	2.69523	2.6639	2.71054	2.67439	2.65706	2.65456	2.83236	3.05136	2.98038	3.09474	2.74995	2.63667	2.70524	2.4853	2.67195	2.96162	2.7031	2.5135	2.72518	2.75022	2.46605	2.37526	2.82811	2.62219	2.07433	2.92918	2.35715	2.64057	0.177546	2.68615	2.24329	0.0321574	0.118403	-4.03042
AKAP12	2.62116	2.91973	3.33762	3.84792	3.82154	3.30773	3.16592	3.19755	3.64884	3.74381	3.16497	2.97931	3.20318	3.00885	3.20701	2.7959	2.93761	2.86396	3.3448	2.99116	2.57146	2.84301	3.1688	2.34442	3.93459	3.77251	2.73922	2.66414	2.07097	0.287501	3.11095	1.78924	0.0833421	0.224727	-4.83742
AKAP13	3.3794	3.06439	3.05031	3.18904	3.1926	3.14481	3.24668	2.86549	3.0757	3.26303	3.12382	3.277	2.76044	2.68165	2.91104	2.81366	2.95131	2.90115	3.15178	3.09636	2.99965	3.03859	3.18175	2.60837	3.85564	3.65339	2.41001	3.13017	3.19168	-0.0432889	3.07617	-0.395961	0.694843	0.81566	-6.28336
AKAP6	3.57169	2.93867	3.39048	3.14737	3.30483	3.27981	3.69046	2.50467	2.62638	3.09986	2.46385	3.25432	2.96461	3.44848	3.39785	3.10481	4.05218	3.06748	3.11734	3.24248	3.32911	3.32413	2.82811	3.94929	3.12037	3.52716	2.66543	3.40256	3.48428	-0.0642035	3.21717	-0.456946	0.650893	0.786287	-6.25746
AKAP7	2.64121	2.39029	2.41851	2.37884	2.58602	2.43885	2.56023	2.6295	2.45861	2.3171	2.66358	2.09622	2.49292	3.05285	2.67525	2.81202	2.42447	2.7922	2.60309	2.87726	2.57186	2.56671	3.011	2.83675	2.0337	2.51129	2.62164	2.8375	2.75318	-0.136458	2.58802	-1.53194	0.13567	0.303185	-5.22944
AKAP9	2.32142	2.24349	2.33352	2.36262	2.94102	2.26751	2.7611	2.9465	2.96461	3.01596	2.89979	2.24251	2.49613	2.28288	2.58818	2.46315	2.62116	2.68863	2.49548	2.74967	2.73543	2.34319	1.96756	2.89378	2.76262	1.85992	2.64618	2.27865	3.15332	0.025752	2.56296	0.212101	0.833415	0.907108	-6.33919
AKIP1	2.33639	2.0462	2.38835	2.49292	2.2246	2.38297	2.41712	2.3991	2.12986	2.30716	2.09335	2.71081	2.5313	2.70415	2.21808	2.35308	2.42414	2.4704	2.35669	2.40633	2.26506	2.45998	2.61908	2.61879	2.27436	2.42088	2.49845	2.22833	2.79995	-0.0891967	2.39924	-1.21489	0.233572	0.425302	-5.63975
AKR1B1	3.53962	3.55675	3.94338	3.66944	3.6399	3.9588	3.90761	2.45829	2.67811	2.96749	3.01619	3.50209	3.9937	3.69914	3.56154	3.54615	3.75598	4.20113	3.56829	4.06306	3.92888	4.15645	4.4309	4.16074	3.33516	3.8352	5.00987	3.68878	4.11091	-0.547006	3.72012	-3.4108	0.00181676	0.0196174	-1.43711
AKR1C1	2.89634	2.80152	2.62664	3.60121	3.62463	2.88569	3.63582	2.35759	3.95577	3.97991	3.067	2.83923	3.11734	2.53667	2.48695	3.6241	2.91159	3.22267	3.83977	4.02259	3.5521	3.08409	2.95367	3.00912	3.87172	2.24001	3.9937	4.63567	3.31423	-0.36369	3.26508	-1.77977	0.0849092	0.227412	-4.85273
AKR1C3	2.02557	2.06721	1.36459	2.3318	2.78945	1.97618	2.12063	1.93788	2.45513	2.40589	1.83789	2.16278	2.43955	0.65695	1.52071	1.90549	3.16592	2.37837	2.72727	2.7961	2.22268	1.96835	2.7445	1.73798	2.77612	2.43885	2.56207	3.97175	2.8156	-0.52652	2.28632	-2.62202	0.0134234	0.0679647	-3.25996
AKT3	2.40191	2.4827	2.44234	2.75318	2.74309	2.62696	2.41233	2.77241	2.95477	2.98122	2.51445	2.3811	2.67311	2.2203	2.3436	2.54889	2.71054	2.42384	2.38562	2.57517	2.41851	2.24049	2.37997	2.29355	2.84913	2.28477	3.1133	2.391	2.25379	0.118623	2.53697	1.30417	0.201766	0.389323	-5.53271
AKTIP	3.13961	3.39875	3.35673	3.5316	3.6323	3.37724	3.31588	2.81341	2.92888	3.33286	2.72889	3.2476	3.37771	3.36156	3.34006	2.8114	3.33516	3.47853	3.29437	3.69486	3.37724	3.52046	3.28325	3.68327	3.42877	3.80374	3.48704	3.36799	3.44416	-0.251603	3.34115	-2.85416	0.00762175	0.0474445	-2.75071
ALAD	2.1841	3.0757	3.50271	2.68637	2.7907	2.85849	3.32591	3.25045	3.34084	2.93075	2.69112	2.66161	3.39658	3.49009	3.07769	2.68516	3.68878	3.38568	2.77558	4.17591	3.09227	3.40161	3.076	2.1396	3.19067	2.86152	2.56175	3.22498	3.52402	-0.0799941	3.07057	-0.492885	0.625564	0.768764	-6.24048
ALAS1	4.02696	4.01759	4.05058	3.84228	3.68502	3.53037	3.83619	3.14239	3.11943	3.52279	3.58662	3.91396	3.45596	3.96884	3.87172	3.81298	3.50458	3.7088	3.94338	3.94494	3.77023	3.97812	3.99684	3.52829	3.73417	3.78104	3.31737	4.08808	3.74381	-0.0952796	3.73874	-0.955002	0.346958	0.544527	-5.91153
ALCAM	2.8243	2.93788	2.07712	3.43596	4.13815	3.22915	2.93433	4.15479	3.99684	4.22906	4.31263	2.94783	3.33481	2.89005	3.46182	2.74172	2.96488	2.78638	2.99797	3.6143	3.62748	2.59774	2.24148	2.13289	4.00183	2.1692	2.7434	2.70221	2.05635	0.524141	3.11319	2.28918	0.0290314	0.111603	-3.94144
ALDH18A1	2.49115	2.3792	2.11751	2.02418	2.58378	2.27396	2.25763	2.30961	2.29489	1.93516	2.56924	1.88081	2.83871	2.57307	2.55434	2.56857	2.67311	2.03218	2.04212	2.08914	2.12634	2.44234	3.09719	2.30794	2.2774	2.37959	1.98279	2.07433	1.88647	0.143902	2.31251	1.31579	0.197883	0.38428	-5.51828
ALDH1A1	1.04408	2.55728	2.51445	2.94102	3.36532	2.57363	2.30716	3.61575	3.18307	2.92743	3.195	2.16391	3.1176	1.83511	2.94594	2.4755	2.23614	2.87864	3.09292	2.64867	2.76465	1.94348	1.96924	2.92003	2.24666	2.19598	3.23505	2.46233	2.27557	0.0941952	2.60799	0.471818	0.640357	0.779435	-6.25058
ALDH1A2	1.54678	2.6668	2.41166	3.36418	2.8362	2.31371	2.80839	2.0056	3.17249	2.61644	3.19458	3.09505	2.59678	1.43299	2.44787	3.27737	1.55228	1.92773	3.01499	1.80125	2.43885	1.79447	2.30247	3.72613	1.99011	2.12317	2.85323	2.37765	2.20209	0.170018	2.47901	0.795204	0.432536	0.621343	-6.04816
ALDH1B1	2.71875	2.89463	2.63091	2.45053	2.62664	2.31194	2.56513	2.59774	2.27172	2.3792	2.76585	2.89305	1.70858	2.77497	2.79562	2.44986	2.26937	2.58502	2.16278	2.42558	2.46788	3.35814	3.09756	2.97271	2.75264	2.61615	3.21088	2.39353	2.50207	-0.17652	2.6086	-1.45609	0.155412	0.332078	-5.33515
ALDH1L1	2.86396	2.23677	2.93491	2.2865	2.49084	2.24434	2.97152	1.94809	1.46466	1.97384	1.62371	1.83701	3.13815	4.32998	3.06025	3.277	3.35419	2.56055	2.89005	3.22206	3.25933	2.54361	3.05227	3.30736	2.28564	1.80992	3.30808	2.69195	3.35374	-0.266709	2.7007	-1.14816	0.259676	0.455956	-5.71525
ALDH3A2	3.62673	3.26083	3.3313	3.29665	3.37896	3.1825	3.28176	3.28245	3.29705	3.1713	3.47103	3.06165	3.29437	3.07733	3.20258	3.2563	3.29527	3.2735	3.05513	3.20352	3.21367	3.42276	3.28024	3.08261	3.21788	2.81466	3.15797	2.73564	3.64315	0.105412	3.23685	1.39619	0.172565	0.352847	-5.41532
ALDH4A1	3.14511	3.31159	2.91973	2.62313	3.23276	2.68547	3.6497	2.52566	2.93043	3.07423	2.7987	3.11452	2.74753	3.39922	3.15148	2.96029	3.72008	2.37317	3.12927	2.86945	3.32251	2.91973	3.19851	2.99396	1.89529	2.87179	3.08912	3.17418	2.86729	0.166192	2.98945	1.24747	0.221558	0.411778	-5.60148
ALDH5A1	3.0747	3.22142	3.50825	2.57146	2.75347	3.21438	3.22915	2.98096	2.74392	3.0052	2.86228	3.94779	2.4704	3.37157	3.32366	3.10967	3.52279	3.04544	2.99539	2.64838	3.30217	3.14399	3.32749	3.63433	2.52629	2.5863	2.54425	2.07162	3.16199	0.196779	3.03099	1.34222	0.189262	0.372555	-5.48503
ALDH7A1	2.08504	2.44718	2.2838	2.19323	2.58573	2.56232	2.39686	2.68075	2.3183	1.97543	2.49223	3.43826	1.97234	3.23075	2.37884	2.2203	2.65401	2.43427	2.6442	2.60998	2.5673	2.23064	2.34599	3.16299	2.04296	2.32934	2.39467	2.29624	2.43626	0.00770491	2.46242	0.0597945	0.952703	0.972499	-6.35992
ALDH9A1	3.22436	3.40311	3.57218	3.25867	3.72421	3.47714	3.52046	3.77023	3.15797	3.71537	3.55797	4.06306	3.0587	3.24163	2.90337	3.17788	3.37535	3.4284	3.37198	3.38142	3.64237	3.31808	3.07903	3.61224	2.90038	3.14239	3.17012	3.01252	3.47714	0.128955	3.37027	1.25432	0.219093	0.409709	-5.59332
ALDOC	3.98813	3.67615	3.96884	3.80141	3.76822	3.55479	4.00505	3.42146	2.85297	3.58015	3.4837	3.65339	4.25785	3.80038	4.17307	4.49691	4.21977	4.37215	4.02575	4.37215	4.14031	3.84328	4.66043	4.25237	2.84558	2.99169	4.19649	3.12354	4.04093	-0.0993746	3.84713	-0.57236	0.571202	0.729966	-6.19846
ALG13	2.2799	2.17191	2.09275	2.10195	2.2	2.05267	2.13526	2.6559	2.68256	2.55938	2.50238	2.01263	2.01575	1.90642	2.26895	2.1058	1.94348	1.96756	1.9567	1.94903	2.06784	2.21241	2.19426	1.89619	2.29442	2.60382	2.15032	2.40273	2.183	0.0603997	2.19193	0.678429	0.502528	0.677842	-6.13284
ALG5	2.31371	2.47715	2.54456	2.7013	3.18013	2.50665	2.4606	2.89798	2.84019	2.76831	2.93234	2.69141	2.81389	2.37559	2.0885	2.41032	2.41032	2.72684	2.73309	2.81112	2.48129	2.67495	2.73469	2.08504	2.62313	3.1688	2.86626	2.98836	2.51698	-0.0883528	2.64909	-0.858265	0.397327	0.590119	-5.99708
ALKBH1	3.14239	2.7434	3.20539	3.04391	3.11479	3.17217	3.15926	2.32707	2.68019	2.74279	2.1058	3.06274	3.42357	3.49277	3.35929	3.39367	3.12235	3.31543	3.03079	3.33167	3.40951	3.15236	3.70426	3.25118	2.94783	2.82587	3.00622	3.21088	3.2117	-0.182659	3.09273	-1.49725	0.144431	0.316068	-5.27835
ALMS1	2.17783	2.07365	1.75125	2.00237	2.16613	1.89529	2.03218	2.5141	2.70278	2.4978	2.74753	1.99778	1.95339	2.19941	1.86094	2.34599	2.1869	1.84547	1.94809	1.94078	1.85288	1.93334	1.76101	2.85491	1.44282	2.1187	1.9207	2.02642	2.14233	0.200379	2.09975	1.75373	0.0893501	0.235136	-4.89449
ALOX5	1.80256	1.06527	2.53514	1.8126	2.46572	1.94809	1.8088	3.01551	2.59408	2.84558	2.66596	2.15913	2.99676	2.18247	2.64808	2.68923	1.84759	2.53587	3.00147	1.93148	2.4667	1.83901	2.2766	1.44282	2.27396	2.45583	1.91729	2.18903	1.57592	0.140144	2.24098	0.787257	0.437103	0.625269	-6.05433
ALOX5AP	2.30288	1.9153	2.72375	2.92941	3.17514	2.6044	2.53349	4.49691	4.27545	4.23753	3.94494	3.70079	4.31973	2.01963	3.82053	3.54285	2.25893	3.58607	2.9435	2.70524	3.15825	2.75736	2.84628	1.29657	1.8905	2.39946	1.32543	3.00179	1.29107	0.790167	2.89666	2.64276	0.0127729	0.0656621	-3.21554
ALPG	2.97657	2.58378	2.70927	2.7445	2.89979	2.86902	2.65958	2.98288	2.76938	3.19531	2.89883	3.7913	1.72085	2.53587	2.13595	2.10508	2.14928	2.93761	2.79048	2.98361	2.90848	2.92333	2.64474	3.03402	3.12354	3.20828	3.05781	3.12473	3.11973	-0.298195	2.81323	-2.13269	0.0409674	0.139274	-4.23954
ALPK1	2.44451	2.86008	2.34442	2.72062	2.38614	2.48301	2.53945	3.52402	3.43913	3.20385	3.20155	2.78264	2.33639	2.05555	2.32795	2.22602	1.89914	2.55532	2.71456	2.74607	2.45225	2.4827	1.88744	2.01263	3.26743	2.64924	2.75045	2.86317	2.34802	0.0730191	2.60358	0.463425	0.646294	0.783497	-6.25449
ALPL	2.16278	2.17142	2.37363	2.07712	1.69654	2.14928	2.32341	2.31194	1.93788	2.6869	1.82788	1.53409	2.33222	2.7369	2.11682	2.56513	2.35624	2.30288	2.29355	2.70792	2.22833	2.35955	2.89066	1.79447	1.66524	3.3572	1.6289	3.63433	2.6955	-0.265553	2.30754	-1.55544	0.129983	0.295333	-5.19576
ALS2CL	3.12473	2.60872	2.8149	3.07792	2.87772	3.03918	3.04661	2.91382	3.22703	2.35012	2.4167	2.93157	3.40434	2.91262	2.93634	3.00777	2.42729	3.2241	3.05198	3.48493	3.02002	2.89305	2.99746	3.05	3.34859	3.36492	3.01688	2.92435	3.12687	-0.236005	2.98691	-2.43824	0.02068	0.0907378	-3.64385
AMD1	2.80867	2.98038	2.84913	1.9361	2.39989	2.56449	2.75578	2.48129	2.391	2.40146	2.61556	3.07519	2.3665	2.82896	2.51027	2.2926	2.91949	3.6808	3.08184	3.37112	3.40517	3.39232	2.79895	2.81649	3.3662	3.3996	2.80764	3.68327	4.00183	-0.718469	2.89593	-5.85076	1.87e-06	0.000334461	5.03677
AMFR	3.53311	3.40609	3.45923	2.41001	1.42497	2.57485	3.50333	2.06784	2.88236	3.04391	2.69932	2.14799	3.16537	3.26402	2.50995	3.06967	3.4973	3.315	3.16084	3.0888	2.53587	3.63498	2.94132	2.79349	3.38306	2.7788	3.44265	3.51607	2.97961	-0.268562	2.97344	-1.45401	0.155984	0.33248	-5.33798
AMIGO2	2.58818	2.37725	2.40494	2.64503	2.36144	2.28564	1.81489	3.36384	3.37444	3.1784	3.39316	2.87642	2.71642	1.55958	2.46165	3.46589	2.07037	2.46315	2.9121	1.62722	2.32142	1.18037	2.03663	2.0063	2.06213	1.61804	1.79583	2.03125	1.92872	0.644788	2.37658	3.44126	0.00167523	0.0185672	-1.36207
AMMECR1	1.63552	1.86094	1.67012	1.80369	2.01263	1.85091	1.55643	2.55996	2.63448	2.76324	2.70496	2.08358	1.58714	1.38329	1.89224	1.45633	1.47261	1.55228	1.74248	1.74762	1.72956	1.5038	1.47615	1.93237	2.27038	2.3811	1.6861	2.32969	1.81718	0.0895538	1.89989	0.603686	0.55044	0.714825	-6.18021
AMOTL2	3.84328	3.35085	3.29073	3.43968	2.91898	3.7948	3.3589	3.40111	3.43826	2.95791	3.20482	3.41147	3.49328	4.29291	2.77639	3.2867	4.07727	3.28325	3.12119	3.23743	3.16299	2.0865	2.78186	3.42595	2.77851	2.31146	2.85897	2.86096	2.66414	0.550508	3.20381	3.81794	0.000603567	0.0108622	-0.412567
AMPH	3.40212	3.97708	2.71744	2.98199	2.70819	2.55265	2.91104	1.89224	2.47623	3.117	3.12619	2.91638	2.58679	1.94991	3.63295	2.76234	2.32064	2.56543	2.3865	2.53667	2.64446	2.06151	2.29355	4.02411	2.10719	1.95592	4.64457	2.62664	3.34048	0.059778	2.80063	0.24951	0.804611	0.888166	-6.33055
AMT	3.42877	3.14026	3.45815	3.25118	3.42788	3.63815	3.10413	3.17615	3.37589	3.28325	3.02708	3.59559	3.73332	3.67111	3.69218	3.74738	3.15467	3.36454	3.32366	3.47486	3.40875	3.38478	3.34859	3.82899	2.44024	2.02179	3.53372	2.60309	3.45143	0.224149	3.31343	1.5893	0.12213	0.283382	-5.14645
AMZ2	3.28363	3.41147	3.40609	3.36946	3.23817	3.50209	3.31971	3.26042	3.20184	3.37809	3.16372	2.95449	3.28754	3.55975	3.35673	3.16084	3.40517	2.60464	3.07313	3.30337	3.52349	3.33721	3.09929	3.57938	2.31938	3.01181	3.23817	2.83968	3.33641	0.203868	3.22501	2.05573	0.0483049	0.15577	-4.38047
ANAPC10	2.3925	2.46854	2.22974	2.17142	2.6	2.15532	2.14636	2.0331	2.08358	2.22414	2.4488	2.52478	2.09204	2.36394	2.08419	2.07562	2.46352	2.08291	1.96316	2.02983	1.99406	2.36929	2.48236	2.49646	2.27598	2.45196	2.58035	2.25228	2.44718	-0.017392	2.27529	-0.219036	0.828056	0.903078	-6.33769
ANAPC13	3.97372	4.12007	4.17895	4.18185	4.01581	4.13815	3.90888	3.29891	3.67545	3.78469	4.07957	3.85455	3.70164	4.00661	3.7937	4.06692	4.00798	3.85996	3.88227	4.01364	4.06888	3.95191	3.65857	4.04093	3.03525	4.092	3.73629	3.83381	4.0329	0.0781395	3.89634	0.803948	0.427543	0.617097	-6.0413
ANAPC5	2.95232	3.00292	2.81414	2.84216	3.0824	2.88109	3.09257	2.83564	2.79349	2.78362	2.65706	2.74028	3.01843	2.98416	2.92384	3.25833	3.08291	2.88969	2.81007	2.92616	3.01919	3.01279	3.16266	2.98012	2.53618	2.98547	2.88569	2.83564	2.91236	0.0131976	2.92074	0.20121	0.841848	0.912825	-6.34144
ANGEL2	2.3877	2.26422	2.28105	2.40032	2.41166	2.34849	2.32142	2.75682	2.7098	2.57864	2.7876	2.55203	2.44648	2.39872	2.41058	2.2799	2.37526	1.99689	2.3925	2.09129	1.96316	2.02741	1.9216	2.50047	2.0587	2.25478	2.27172	2.1372	2.10251	0.310384	2.32513	4.39041	0.000121917	0.00407861	1.08821
ANGPTL2	3.46434	2.91732	2.95079	3.51676	3.51555	3.01919	2.68224	2.91762	2.81285	2.76776	3.20091	3.95577	2.94375	2.58013	2.25326	2.8311	2.44517	3.48493	3.10317	2.94301	3.26961	3.2985	4.22906	2.47933	4.00982	3.93324	2.6028	4.10004	2.32795	-0.328385	3.12262	-1.71582	0.0961651	0.245392	-4.9544
ANK1	3.62328	3.41925	3.78319	3.75206	3.12838	3.49111	2.73444	2.62584	3.26481	2.99456	3.05809	3.94494	3.18773	3.58938	3.17479	3.58607	2.92223	3.70426	3.59835	3.64077	3.84554	3.51852	3.33596	3.40256	3.18013	2.94783	4.12007	3.25432	4.72061	-0.295146	3.43273	-1.94215	0.0612427	0.184608	-4.58125
ANK2	3.71475	3.60934	3.81298	3.51555	3.06139	3.52969	3.62463	3.3313	2.85323	3.18937	3.52585	4.32259	2.30961	2.66358	2.65349	2.77371	2.82975	3.47261	3.28856	3.32099	3.68787	3.65757	2.74106	4.38741	4.21462	3.69914	4.04093	3.5067	4.21005	-0.431461	3.4327	-2.39094	0.0230566	0.0972248	-3.73968
ANK3	3.25549	2.94622	3.41189	3.28894	3.08291	3.19662	3.25965	2.87237	3.2198	2.76437	3.17045	2.40231	3.10967	3.18428	3.29527	2.97657	2.99965	3.43634	2.7434	3.23426	3.1995	3.37112	2.46972	4.01364	3.2003	3.58421	3.76629	3.22834	2.62841	-0.155128	3.14869	-1.22063	0.23142	0.422619	-5.63307
ANKMY2	3.04602	4.00661	3.46785	3.5051	3.57609	3.52895	3.26197	3.0832	3.41147	3.11452	3.59905	3.81424	3.31627	3.56985	3.49988	3.40731	3.5051	2.60837	3.43225	3.27773	3.32099	2.92435	3.2192	3.47804	2.64316	2.21982	3.44469	2.59933	3.19662	0.423355	3.27855	3.49288	0.0014593	0.0171499	-1.23423
ANKRA2	2.75991	2.81952	2.82779	2.70103	2.67882	2.75415	2.69039	2.52834	2.84103	2.93544	2.852	2.91664	3.00461	2.94758	3.18213	2.63393	3.16111	2.8292	2.49223	2.81285	2.83503	2.56924	2.58878	3.2985	2.38297	2.04378	2.67811	2.33565	2.62869	0.212734	2.74929	2.29186	0.0288576	0.111322	-3.93621
ANKRD12	2.92665	2.888	2.67811	2.76383	2.78972	2.71054	2.66873	3.39741	3.57044	3.11193	3.40917	2.51378	2.59709	2.57186	1.93423	2.35145	2.18054	2.65996	2.74252	2.57685	2.6949	2.53099	2.10251	2.61825	2.90951	2.73718	2.69172	3.0057	3.00319	0.0789996	2.73575	0.58932	0.559913	0.720606	-6.1887
ANKRD17	3.3444	3.10443	3.30217	2.86945	3.05586	2.92198	3.04885	2.85684	3.10856	3.09323	3.12002	2.87422	2.60515	2.78885	2.6028	2.64729	2.85792	2.85605	2.74368	3.10443	2.9754	2.78264	2.69279	3.2198	3.30518	2.87541	3.00408	3.33286	3.24127	-0.0580694	2.97709	-0.666765	0.50985	0.683771	-6.14059
ANKRD2	4.66043	4.79923	4.06888	3.41147	1.65692	3.57044	3.20482	1.96224	1.43616	1.60646	2.12687	3.86124	4.12007	5.17148	5.04478	4.07294	4.4444	3.98303	2.19053	5.14564	5.56279	4.74539	5.68045	3.47303	2.19153	5.79593	2.73945	4.28642	4.23753	-0.685849	3.76726	-1.51508	0.139874	0.309049	-5.25334
ANKRD26	2.72601	2.60515	2.67254	2.76776	2.55599	2.81085	2.84372	2.55665	2.64219	2.61022	2.96059	3.23075	2.58764	2.54066	2.39134	2.66873	2.67718	2.69579	2.64316	2.74832	2.67195	2.65317	2.80639	3.21953	2.51236	1.61971	3.00945	2.53071	3.61575	-0.0302502	2.70946	-0.244675	0.808319	0.890836	-6.33175
ANKRD36B	1.83701	1.97384	1.693	2.29935	2.74897	2.30288	1.7799	3.07706	3.46326	3.15398	2.92862	2.13652	2.30551	1.8905	2.36881	2.64978	1.84134	1.7119	1.72395	1.56199	1.59997	1.32543	0.710733	2.87949	1.63331	1.70699	2.38447	1.36459	1.55404	0.699691	2.0899	3.62899	0.00101114	0.0143587	-0.89353
ANKRD40	3.05365	2.86705	3.03586	2.89574	2.70157	2.92459	2.94001	3.02396	2.89634	3.03835	2.74995	3.42233	1.9844	2.46277	2.68798	2.40273	2.65935	3.03188	3.04237	2.90869	2.85225	2.94455	2.7702	2.65789	3.67372	3.2117	2.99746	3.22471	3.20567	-0.234799	2.90578	-2.09854	0.0440916	0.146515	-4.30255
ANKRD46	2.39029	2.90248	3.04028	2.41994	2.68744	2.59647	2.61644	2.39721	2.47139	2.50941	2.73185	2.85684	2.7702	3.04576	2.85175	2.7969	2.97629	2.54889	2.30029	2.54584	3.01843	2.60837	2.72305	2.74028	2.36437	2.47493	2.77851	2.39824	2.52607	0.123862	2.65821	1.47264	0.15092	0.325026	-5.31248
ANKRD49	2.96329	2.65544	2.97072	3.25965	2.97247	3.06025	2.8032	3.52216	3.40647	3.416	3.36709	2.72279	3.04053	2.7397	2.82223	2.77497	2.8882	2.96273	2.86796	2.96658	2.65054	2.55399	2.66947	2.33002	2.92665	2.74106	3.0052	2.59619	2.2926	0.309073	2.89476	3.10305	0.00406325	0.0326789	-2.17795
ANKRD6	2.25228	2.43803	2.32341	2.39387	2.89634	2.57397	2.21353	2.41753	3.08989	2.70732	2.83778	2.8042	2.29659	2.02106	2.3318	2.19598	2.34044	2.14424	2.32795	2.34666	2.39785	2.61702	2.32748	2.73718	2.42907	2.12387	3.12412	2.33808	2.32385	0.0420224	2.46108	0.392205	0.697588	0.816775	-6.28483
ANKS1A	3.0057	3.25742	3.40352	3.15057	3.32052	3.47582	3.52969	3.16975	3.2735	3.57661	3.06334	3.32995	3.10014	2.74967	2.76747	2.42344	3.0052	2.91841	2.95158	3.35546	3.17389	3.00379	2.82666	3.31271	3.23357	2.94594	3.30188	3.3954	3.58732	-0.0141406	3.15893	-0.13529	0.893257	0.942699	-6.35254
ANO1	1.97299	3.04789	2.2102	2.61615	2.20375	2.17241	2.17241	1.56403	3.49111	2.49361	2.73332	1.68477	2.95533	2.14746	2.02481	2.69039	2.5809	1.77163	1.80763	1.68321	2.13833	2.41851	2.22414	1.69138	2.14686	2.18054	2.34279	2.65518	2.37559	0.27809	2.28267	1.77093	0.0863955	0.230176	-4.86696
ANP32A	2.87396	3.13685	2.80293	2.97152	2.93261	2.77073	2.59933	3.07519	2.66873	3.00968	3.15119	3.02429	2.85491	2.79123	2.90819	2.84129	2.74832	2.68075	2.53276	2.63477	2.59619	2.90038	2.62841	3.11908	2.62749	2.41599	2.77185	2.31896	2.71215	0.230256	2.79654	3.12903	0.00380043	0.0314473	-2.11671
ANP32B	3.22834	3.62186	3.58015	3.81183	3.88363	3.57218	3.39048	3.7937	3.70977	3.9671	3.86503	3.58865	3.30666	3.20631	2.98918	3.1614	3.2985	3.35419	3.44134	3.17615	3.35765	3.21814	2.91949	2.9416	3.25933	3.27981	3.42644	2.93788	3.36336	0.30498	3.40173	3.12293	0.00386062	0.0317526	-2.1311
ANP32E	3.06996	3.09141	2.9499	2.91762	2.92435	3.02708	2.53514	3.12779	3.07681	2.97072	3.36454	3.08576	2.47328	2.74131	2.46511	2.86317	2.73132	2.72202	2.92247	2.85015	2.51636	2.65243	2.56207	2.86443	2.53725	3.02204	2.42344	3.10658	2.84349	0.154886	2.84269	1.70448	0.0982857	0.248817	-4.97211
ANXA11	3.76629	4.02259	3.84554	3.78922	3.80618	3.7937	3.99524	3.25549	3.61704	3.48318	3.55553	3.27152	3.94057	4.09594	4.21005	3.94338	3.68594	3.68255	3.56767	3.97991	3.71186	3.755	3.59905	3.60121	3.44747	3.44997	3.67545	3.35008	3.55553	0.154612	3.70528	1.72134	0.0951457	0.243984	-4.94574
ANXA2	3.21647	2.99396	3.04661	3.79589	4.07727	3.28894	3.32669	4.60506	4.44007	4.74539	4.04675	4.1914	2.12317	1.70532	1.61011	1.59178	2.29212	3.4986	3.56568	3.61509	3.30299	2.93973	2.0809	2.46854	4.19908	4.70878	3.46785	4.22627	3.24979	-0.20261	3.32484	-0.606327	0.548708	0.713936	-6.17863
ANXA3	2.80473	2.33979	2.00237	2.11164	1.5807	2.30757	2.50309	1.79831	2.20525	1.77854	1.47945	3.27918	2.23562	2.69061	2.05952	2.05422	2.75488	2.92561	2.69964	3.50987	2.4437	2.45445	3.41105	2.40708	2.85175	3.38184	2.14469	3.28894	2.58764	-0.607748	2.48592	-3.61917	0.00103841	0.0145386	-0.918283
ANXA5	3.37248	2.95425	3.46379	3.6497	3.53838	3.15866	3.31772	3.06559	2.96059	3.39454	2.96408	2.94515	3.64571	2.97512	3.29357	3.23244	3.41643	3.15734	3.3356	3.16169	2.55297	2.7113	3.5323	3.19067	3.14627	3.13266	2.63419	2.98416	2.53587	0.249527	3.15252	2.3607	0.0247033	0.102283	-3.80026
ANXA6	3.54153	3.88513	3.65954	3.52585	4.0329	3.54966	4.11091	3.71379	3.56568	3.40467	3.41268	3.65954	3.6505	3.83977	3.81552	3.55146	3.15398	3.55918	3.81923	3.60262	3.59905	3.74738	3.60195	3.95072	3.47435	3.05469	4.04866	2.88462	3.61294	0.0717426	3.62167	0.681369	0.500692	0.676983	-6.13087
ANXA7	3.75598	3.63003	3.50933	3.54842	3.80038	3.56985	3.59981	3.59211	3.45714	3.42233	3.61065	3.61065	3.35673	3.48792	3.17817	3.24214	3.56767	3.59621	3.62186	3.54085	3.6005	3.54896	3.44315	3.57104	3.44215	3.72784	3.28408	3.19999	3.37633	0.0297619	3.51353	0.44558	0.658994	0.791867	-6.26256
AOPEP	3.7622	3.57661	3.12002	3.44803	3.30736	3.40256	3.54439	3.19851	3.31588	2.32142	2.95817	2.96428	3.97991	3.21647	3.36532	3.38306	3.35241	3.60458	3.60865	3.72693	3.73417	3.76822	3.1662	3.41229	3.59162	3.72228	3.92338	4.10414	3.5323	-0.351038	3.45212	-2.98226	0.00552855	0.0393912	-2.45913
AP1S2	3.54224	3.422	3.50573	3.12412	3.27954	3.38742	3.30518	3.21207	3.60805	2.97433	3.94338	3.00646	2.99396	3.08663	3.397	3.39275	2.98199	3.90761	3.46693	3.46486	3.63498	3.72008	3.1713	3.61575	3.64315	3.87872	3.10773	3.71537	3.08824	-0.230864	3.39923	-2.24747	0.0318607	0.117833	-4.02237
AP2B1	3.56697	3.65757	3.5521	3.73332	3.64726	3.73417	3.54783	3.70605	3.51394	3.72613	3.24089	3.1846	3.6323	3.53037	3.66603	3.52402	3.20184	3.53838	3.49277	3.52585	3.36915	3.42788	3.43408	3.76295	3.15467	3.44579	3.35198	3.06499	3.1561	0.157189	3.48586	2.08834	0.0450653	0.148484	-4.32123
AP3B1	3.00691	2.66901	3.06748	3.07836	3.0622	3.09141	3.02458	3.05227	2.76139	2.73543	2.9718	2.84155	3.06588	3.0661	3.0286	3.10773	3.15894	3.117	2.91898	2.93015	2.89724	3.00968	3.18866	2.94024	2.77824	2.80128	2.8362	2.97931	2.74776	0.0588974	2.96325	0.95423	0.347342	0.544739	-5.91225
AP3D1	3.38184	3.43028	3.37031	3.33887	3.08938	3.37031	3.58467	2.9672	3.01202	3.0874	3.01657	3.14297	3.18363	3.50987	3.08965	3.14026	3.22915	3.50393	3.23214	3.44416	3.31846	3.65339	3.57541	3.24056	3.30217	3.6115	3.35929	3.29073	3.45097	-0.183206	3.30783	-2.5815	0.014784	0.0727474	-3.34614
AP3M2	3.0469	2.84301	3.45295	2.9499	3.09719	2.99066	2.63927	3.01412	3.09357	3.52161	3.67041	3.48792	2.8476	2.96658	2.87371	2.7907	2.93456	2.74368	2.49455	2.46315	2.57336	2.51282	2.44953	2.93973	2.31146	2.37997	2.58878	2.04512	2.44517	0.576194	2.83338	5.76738	2.37e-06	0.000380689	4.8114
AP3S1	3.26369	3.29629	3.41229	3.65426	3.64315	3.6497	3.539	3.34239	3.46536	3.56568	3.50333	3.14596	3.45768	3.14207	3.44954	3.24321	3.60805	3.64884	3.64237	3.40352	3.42051	3.35045	3.26266	3.11051	3.75414	3.52762	3.21565	3.13494	3.14771	0.0493048	3.41381	0.63789	0.528224	0.696929	-6.1592
AP3S2	3.05311	2.8476	2.8702	2.99169	2.94132	3.0115	3.04275	2.44234	2.03435	2.45445	2.71504	3.11393	2.95367	3.1792	3.11878	2.99941	3.41105	3.12119	2.90869	3.3313	2.88411	3.1926	3.47853	3.34365	2.76324	2.96963	3.27918	2.80018	2.89402	-0.187562	2.97058	-1.70217	0.0987232	0.24923	-4.97571
AP4S1	1.87062	2.04574	1.79583	1.79968	1.70326	1.83701	2.06898	1.9207	1.89224	2.0446	2.44299	2.20867	1.56199	2.1656	1.70141	1.5807	1.72807	1.74248	1.71328	2.04574	1.97855	1.97	2.21498	2.54456	1.90831	2.35843	2.60837	1.8519	2.3925	-0.206753	1.98956	-2.05141	0.0487492	0.157017	-4.38826
AP5M1	3.15398	3.17317	3.16051	2.85355	3.2867	3.06356	2.65619	2.89195	2.57574	2.83849	2.82223	3.22915	2.74607	2.88515	2.59444	2.77976	3.26083	3.25011	3.02657	3.21113	2.85605	3.12779	3.09082	3.23316	3.31196	2.84937	3.19132	3.32827	3.21814	-0.201728	3.02297	-2.44218	0.0204924	0.0901168	-3.6358
AP5S1	2.83088	2.58325	2.61345	2.87519	2.37687	2.52507	2.87998	2.80945	2.57429	2.62897	2.60777	3.09046	2.15032	2.43044	2.2312	2.59408	2.83503	2.79325	2.67222	2.8702	2.90307	3.14366	2.75045	2.7602	2.45861	3.24127	3.21367	3.23108	2.8839	-0.284443	2.74339	-3.00976	0.00515647	0.0377015	-2.39563
APAF1	1.97	1.91321	1.84872	1.9216	1.97941	2.22122	1.99689	3.12745	3.16497	2.60602	2.9022	2.557	2.3198	1.98134	1.85494	1.92872	1.59178	1.92872	1.99616	1.75802	1.7907	1.82289	1.39513	1.67828	2.69358	2.28431	1.74907	1.98692	1.60403	0.337894	2.08873	2.19641	0.0356605	0.126517	-4.12
APBA3	2.25794	2.68165	2.1656	2.23865	2.70337	2.23562	2.51482	2.72943	2.43846	2.25997	2.51517	2.36109	2.42126	2.34756	2.24828	2.32424	2.0337	2.52874	2.48301	2.34319	2.50736	2.40896	2.55176	2.32341	2.8292	2.30288	2.82616	2.88186	2.79562	-0.18419	2.4572	-2.27853	0.0297312	0.113057	-3.9622
APBB1	3.04789	2.78165	2.9962	2.89798	2.5313	2.92223	3.14272	2.21241	1.8063	2.48195	2.17241	2.7518	3.08075	3.28482	3.07059	2.82117	2.56402	3.03479	2.76962	3.26266	2.95312	3.16169	3.38887	2.99797	3.13552	2.8476	3.71475	3.05642	3.52762	-0.415032	2.91092	-3.19566	0.0031985	0.028314	-1.95852
APC	2.14573	2.05952	2.24483	2.04129	2.06455	2.13778	1.91113	2.13652	1.83053	2.03566	2.17682	2.41917	2.31497	2.51881	2.24298	2.3171	2.7753	1.88744	1.89224	1.96224	1.99994	1.97941	1.6719	2.74776	1.73947	2.1155	2.18999	1.87062	2.36262	0.163467	2.13075	1.67364	0.104254	0.257138	-5.01979
APEX1	2.95903	2.92641	3.11359	3.10747	3.20992	3.16912	2.79349	2.78389	2.88878	2.62556	2.67495	2.88878	3.1805	3.29047	3.12235	3.03374	2.75533	3.20318	3.14655	3.2458	3.25773	3.22267	3.5145	3.17514	2.87422	3.47962	3.06356	3.16912	2.90307	-0.215967	3.06133	-2.7483	0.00989225	0.0561316	-2.98613
APH1A	3.16851	3.09787	3.18669	3.13928	3.13113	3.0664	3.15894	2.97796	2.97349	3.53037	2.77151	3.20155	2.95559	2.94375	3.10803	3.1745	2.97844	3.24282	3.43452	3.32206	2.97247	3.41508	3.58732	2.87422	3.1057	3.6526	3.0305	2.90337	2.90115	-0.111485	3.13813	-1.31484	0.198199	0.384441	-5.51947
API5	2.89517	2.5141	2.85435	2.69195	2.74225	2.79429	2.8292	2.81112	2.56115	2.52417	2.83871	2.4664	2.91329	3.02744	3.01202	2.957	3.31423	2.92384	2.62087	2.78785	2.81466	2.90563	2.87467	3.37896	2.59444	2.57784	2.42944	2.55883	2.52041	0.0596841	2.78394	0.658672	0.514964	0.68802	-6.14589
APIP	2.53819	2.87921	2.64534	2.3448	2.53917	2.75712	2.44057	2.35547	2.48385	2.5365	2.21808	3.16299	2.3991	2.71032	2.30504	2.37997	2.58968	2.6081	2.99396	2.52452	2.66079	2.8702	2.7434	3.2532	2.74172	2.99371	2.70927	2.80559	2.71642	-0.25554	2.65194	-2.96021	0.00584518	0.0406036	-2.50983
APLP2	3.9654	3.90258	4.092	3.86503	3.66109	3.87614	3.95729	3.8587	3.17418	3.6505	3.40517	3.47714	3.87614	4.00183	4.0191	3.98452	4.23489	3.97569	3.71906	3.71073	4.07517	4.01581	3.63582	3.91396	3.57938	3.42595	3.84453	3.29009	3.72784	0.080795	3.7902	0.82516	0.415579	0.605276	-6.02436
APOB	2.65876	2.33602	3.6771	2.50704	1.18037	2.79666	2.92542	3.35338	2.3792	1.60403	2.1818	3.68502	2.83189	2.46788	2.20375	2.06455	2.74197	2.66212	2.47761	3.10259	1.61388	2.95722	2.29442	3.17012	2.28688	3.35419	2.78662	2.65013	2.45722	-0.0866794	2.60027	-0.411947	0.68321	0.809373	-6.27692
APOBEC3C	1.97759	2.35179	1.82289	2.19888	2.073	2.36689	2.15164	2.98416	2.33532	2.47076	2.34633	2.69012	2.05133	2.26895	2.34279	2.40708	2.00892	2.08994	2.20972	2.2081	2.2312	2.1452	2.47588	2.56575	1.84657	1.67499	2.86729	1.76217	2.1759	0.097478	2.24487	0.860617	0.39605	0.588784	-5.9951
APOC2	2.59271	2.25997	2.3677	2.64702	2.45331	2.40896	2.4667	2.07097	1.9607	1.39089	3.57609	1.49528	2.96217	2.63819	2.24148	2.66212	2.08003	2.57838	2.3712	2.56575	2.3925	2.69225	2.2865	1.76998	3.50889	4.25237	2.40273	3.37589	2.36732	-0.34457	2.51166	-1.65214	0.108591	0.263528	-5.0526
APOD	4.46299	5.04478	5.11991	5.46315	3.64805	5.00987	4.37918	3.47764	5.41546	2.90977	2.92542	3.35929	5.23293	4.97369	6.01864	3.38436	4.8958	5.41546	5.68045	5.37873	4.94338	5.23293	5.04478	4.18938	4.41671	6.65891	4.16074	5.20097	5.04478	-0.659763	4.72718	-2.14141	0.0402021	0.137357	-4.22334
APOE	2.59742	2.55042	2.66414	3.13815	3.8911	2.9369	2.51609	4.21664	3.59162	3.17586	4.27863	0.837933	2.3925	1.66524	3.47103	3.27654	2.03663	2.87702	2.93234	2.72375	2.7611	2.19153	2.99193	2.41524	2.1568	2.8465	3.33679	3.20283	2.67525	0.137028	2.83958	0.529004	0.600567	0.749548	-6.22214
APOLD1	3.0395	3.11142	3.01718	3.307	3.91275	3.26999	3.19458	3.06474	3.50209	3.42877	3.04104	3.46904	2.90683	3.58281	3.46379	3.56511	2.69579	3.18393	3.24163	3.2651	3.39098	3.04789	2.70897	3.48217	3.18175	3.38696	2.96162	2.74392	2.7447	0.157332	3.20386	1.45125	0.156747	0.333419	-5.34174
APOM	2.34968	2.02418	1.75958	2.11369	2.1452	2.04212	2.01963	1.78636	1.6589	1.50666	1.60403	2.17902	2.09504	2.68019	2.49115	2.3991	2.76556	2.36971	1.98768	2.183	2.31748	2.43391	2.99248	2.52478	1.72395	3.02964	2.12858	2.47396	2.31748	-0.278255	2.21044	-2.07006	0.0468564	0.152525	-4.35452
APOO	3.75698	3.69914	3.93459	3.83381	3.59008	3.79237	3.96332	3.48658	3.1926	2.87422	3.49009	4.16577	3.13017	3.77798	3.4827	3.65339	3.81552	3.7913	3.86503	3.86379	3.78556	3.96063	3.753	3.48658	3.66857	3.69637	3.6526	3.87989	4.13372	-0.168911	3.69574	-1.63856	0.111406	0.268238	-5.07313
APOOL	3.03317	2.79763	3.18608	2.82896	2.73922	3.08824	3.04154	2.64754	2.43186	2.23259	2.80609	3.7611	2.75208	3.03317	2.96189	2.86626	3.19971	3.04661	2.92616	3.10912	2.92408	3.26042	3.0757	3.21859	2.64249	2.99274	2.90007	3.25156	3.02396	-0.124657	2.95788	-1.17637	0.248394	0.443659	-5.68381
APP	3.20258	3.22739	3.32555	3.42146	3.48601	3.48108	3.16468	3.20063	3.23997	3.53617	3.72008	3.23849	2.58792	2.89665	2.9108	3.17217	3.52402	3.3996	3.22803	3.3295	3.31971	3.17317	2.8642	3.04001	3.43859	3.3313	3.19634	3.25183	3.31311	0.0145894	3.249	0.160434	0.873579	0.931182	-6.34882
APPBP2	2.50941	2.3183	2.60931	2.4353	2.50437	2.50498	2.57307	2.84103	2.39467	2.78593	2.44407	2.48	2.53445	2.6624	2.70337	2.29047	2.67148	2.55135	2.44057	2.58152	2.53971	2.49292	2.64503	2.52607	2.37884	2.74028	2.68798	2.26374	2.50238	0.0156605	2.53838	0.248005	0.805764	0.888909	-6.33092
APPL1	2.81171	2.78972	2.66358	3.01202	3.52829	3.02565	2.47588	2.60082	2.88083	2.71241	3.20385	3.52103	2.85818	3.19168	2.86579	3.17045	2.98774	2.90792	2.68385	2.98096	3.07423	2.54584	2.99588	2.77425	2.48	2.35385	2.48129	2.70792	2.85225	0.222283	2.86682	2.16544	0.0381578	0.132363	-4.17842
APPL2	2.37164	2.31288	2.45445	2.34402	2.19941	2.62087	2.2594	2.01963	2.44118	2.24298	2.56543	2.26422	2.88543	2.61163	3.20125	2.7013	2.45053	2.32467	1.93699	2.13052	2.29624	2.2799	2.47139	2.62057	2.53971	1.56931	2.23821	2.05781	2.1645	0.248274	2.36469	2.33322	0.0262915	0.105728	-3.85485
APRT	1.95181	2.55665	2.55852	2.62923	2.62116	2.41627	2.52289	2.39211	2.55563	2.69331	1.85882	2.43012	2.7959	2.20757	2.71456	2.05133	2.63869	2.71619	2.58764	2.53587	2.59587	2.86443	3.24163	2.38184	2.55135	3.15675	3.06274	2.72489	2.27436	-0.277723	2.56166	-2.58463	0.0146745	0.0723508	-3.33951
APTX	2.20159	2.45722	2.68819	2.351	2.72456	2.39989	2.3677	2.53445	2.44024	2.56635	2.65371	2.29212	2.35843	2.53819	2.39504	2.51911	2.41917	2.44484	2.45015	2.52695	2.21564	2.20695	2.47761	2.64949	2.50376	2.77445	2.67195	2.26047	2.31098	0.00734592	2.46208	0.108576	0.914238	0.953746	-6.35581
AQP3	2.21406	1.88417	1.53409	1.16164	0.924913	0.94637	1.85494	1.8063	2.46277	0.837933	2.02983	2.61314	1.55404	1.36459	2.78913	1.45315	0.710733	1.47945	1.83789	2.75664	2.50167	2.11624	3.88654	1.39513	1.35974	3.15983	2.64897	3.0763	2.39686	-0.729205	1.95714	-2.93273	0.00626367	0.0424552	-2.5727
AQR	2.67778	2.52729	2.41561	2.64729	2.63869	2.64032	2.34133	2.99676	2.88734	2.74197	3.03682	2.69679	2.69579	2.34083	2.61825	2.30923	2.5014	2.63504	2.76437	2.52478	2.62584	2.70819	2.40964	2.35843	2.70278	2.67283	2.69358	2.65317	2.64675	0.0139206	2.62444	0.187263	0.852673	0.919808	-6.34415
AR	2.83531	2.95184	2.8882	2.67036	2.86926	2.74225	2.99991	2.9108	2.26374	2.85272	2.44689	2.98262	2.08719	2.7686	2.96936	1.94526	3.97041	2.70448	3.14957	2.82298	2.64867	3.12473	2.46511	3.29047	3.05338	3.14771	2.62923	2.78714	3.61065	-0.179038	2.84789	-1.22093	0.231307	0.422619	-5.63272
ARAP1	3.01573	2.95975	2.90848	3.22915	2.89086	3.05972	3.25742	3.04941	3.12412	3.34766	2.99797	3.2003	3.44579	2.73897	2.97322	3.16687	2.96461	3.14207	3.12619	3.08488	3.22055	2.87752	2.83849	3.28823	3.11393	2.66437	3.16818	3.0511	2.31331	0.087502	3.04203	1.002	0.324094	0.523902	-5.86687
ARAP3	3.13896	3.05227	2.94758	3.0123	2.53478	3.23316	2.79946	2.5185	2.9499	2.8232	2.69706	3.24321	3.16372	2.62841	2.96428	2.95477	2.75991	2.73254	2.95641	2.68892	2.87519	2.75096	2.69039	2.56987	3.14833	3.15023	2.31194	3.24807	2.92743	0.0696246	2.87834	0.739683	0.465052	0.649073	-6.09004
ARCN1	2.75664	2.96963	2.85544	2.99651	2.7881	2.77669	2.9718	2.54834	2.58991	2.67148	2.96488	2.5498	2.76234	3.06811	2.91002	2.94024	2.9909	2.52391	2.74995	2.78913	2.73022	3.00262	2.77472	2.92616	2.99485	2.76139	2.53852	2.99116	2.74422	0.0361458	2.81509	0.52457	0.60361	0.75148	-6.22446
AREG	1.3162	1.04408	0.266263	0.837933	1.00386	1.1959	1.40797	0.266263	2.27953	1.18753	0.266263	0.11114	1.09082	1.35171	1.12602	-0.185339	0.872996	0.872996	1.33876	0.58514	1.45021	1.09082	1.00386	1.64419	5.73277	5.00987	1.61599	3.26369	4.18386	-1.40783	1.49073	-3.2722	0.00261943	0.0248413	-1.77482
AREL1	2.86973	2.74309	2.68462	2.71722	2.7611	2.81842	2.65935	3.00461	2.75096	2.62281	3.12927	2.71186	2.45829	2.6075	2.56365	2.74197	2.76293	2.73643	2.61056	2.80178	3.26881	2.60103	2.45547	3.05031	2.79738	2.88652	3.08663	2.84582	2.6075	-0.0707429	2.77088	-0.912694	0.36844	0.565467	-5.95001
ARF1	3.98303	3.93075	3.69135	3.99185	3.89694	3.70708	3.74167	3.26632	3.33374	3.54728	3.43672	3.43172	3.76629	4.19649	3.73417	3.46643	3.40394	3.51555	3.46326	3.74899	3.61575	3.76716	3.60121	3.64805	3.42989	3.71286	3.46084	3.63707	3.55675	0.0815393	3.64425	0.958331	0.345304	0.542947	-5.90843
ARF3	2.76044	2.58439	2.81313	2.87975	3.01843	2.97711	2.78337	3.41508	3.6497	3.05714	3.08456	2.15425	3.48704	2.46926	3.08434	3.07122	2.25679	3.1499	2.97375	2.84731	2.92918	3.05198	2.82452	2.37398	3.31705	3.00379	2.64949	2.92763	2.38988	0.0445992	2.89601	0.338625	0.737173	0.841491	-6.30437
ARF4	3.63151	3.64652	3.62673	3.7948	3.61932	3.69486	3.42315	3.38306	3.72008	3.66412	3.88958	3.43551	3.1688	3.0703	2.96658	2.99965	3.30808	3.30188	3.41724	3.28451	3.16687	3.49689	3.33167	2.8114	3.79033	3.7913	3.01026	3.73332	3.18536	0.113012	3.42633	1.02808	0.311859	0.511449	-5.84122
ARFGAP1	2.74995	2.6295	2.67036	2.77151	2.88462	2.29087	2.85323	2.81708	2.82198	2.7065	2.50736	2.4093	2.88462	2.87396	3.02232	3.49643	2.8642	2.80639	2.66947	2.76938	2.7907	2.71642	2.75237	2.52535	2.59835	2.95232	2.44154	2.68798	2.22703	0.118193	2.73073	1.29386	0.205263	0.392598	-5.54542
ARFGAP2	3.39922	3.35008	3.07122	3.26743	3.48493	3.17045	3.4587	3.58542	3.30152	3.40212	3.13685	3.34726	2.97605	3.06415	2.73332	3.05388	3.1227	2.96428	3.2287	3.31543	3.25905	3.33167	2.94187	3.4006	3.21859	3.18636	3.3624	3.05088	3.14424	0.0305622	3.21825	0.394449	0.695948	0.816305	-6.28395
ARFGAP3	2.68411	2.7087	2.73791	2.34044	2.99941	2.66712	2.5185	2.64121	2.6022	2.44234	2.74197	2.3877	2.68046	2.60695	2.30159	2.79098	2.48624	2.71032	2.83891	2.66619	2.72168	3.008	2.98888	2.12687	3.43551	3.39048	2.54066	3.22977	2.6649	-0.252073	2.71241	-2.42321	0.0214097	0.0928036	-3.67443
ARFGEF1	3.07059	2.94566	2.94325	2.91638	2.77639	2.89005	2.96853	3.12444	3.0763	2.65054	2.68308	3.49643	3.20063	2.67094	2.68489	2.81649	2.59408	2.8991	2.91052	2.89724	3.17289	2.96887	2.59043	2.87864	3.07653	2.62024	3.277	3.39922	2.70337	-0.0372292	2.92768	-0.401354	0.69091	0.813546	-6.28122
ARFGEF2	3.10885	3.25469	3.374	3.0361	3.12412	3.30411	3.23535	2.92542	3.04237	2.96577	3.25244	3.06139	2.85225	3.05491	2.91638	3.05172	3.18139	3.10014	2.9384	3.30256	3.4141	3.09016	3.02964	3.35419	3.32499	2.9037	3.0938	3.10686	3.5179	-0.0789443	3.13509	-1.12666	0.268525	0.465734	-5.73875
ARFRP1	2.81761	2.73791	2.46165	2.87047	2.66079	2.58244	2.79505	2.551	2.58764	2.72249	2.70732	2.89005	2.30247	2.93075	2.7961	2.76324	2.75514	2.8144	2.63637	2.82587	2.70415	2.77558	2.97875	2.98361	2.67811	2.69706	2.85628	2.49223	2.66768	-0.0572862	2.72559	-0.866519	0.392857	0.586435	-5.99012
ARG1	1.98361	1.74907	1.61599	2.01341	1.64594	1.9216	1.78848	2.83942	1.64419	2.58067	1.46053	1.46924	3.04629	2.44917	2.17241	2.65349	2.06673	1.85808	1.91321	1.93878	2.04574	1.87849	2.66543	1.67499	1.85288	2.01432	2.06836	1.74762	1.78221	0.111379	2.01863	0.748874	0.459573	0.64539	-6.08331
ARGLU1	3.08606	3.4827	3.28516	3.02768	3.41319	3.25216	3.11512	3.39875	3.82434	3.66944	3.68404	3.11669	2.97247	3.93459	3.1561	3.47218	2.99941	3.12838	3.21748	2.82452	3.33762	2.85818	2.29047	3.59162	2.77445	2.6869	2.66619	2.65682	2.42126	0.475317	3.14979	3.85383	0.000546791	0.0101763	-0.320269
ARHGAP12	2.16613	2.89326	2.67691	2.64385	2.73043	2.8144	2.53725	3.14737	2.71898	2.44787	3.00073	3.16084	2.5365	2.58991	2.36517	2.36881	2.22175	2.51724	2.55563	2.65567	2.6543	2.45053	2.46165	2.37884	2.80735	2.28203	2.88083	2.74131	2.87074	0.0435677	2.63022	0.443761	0.660295	0.793255	-6.26337
ARHGAP17	3.41508	3.17954	3.32251	3.31113	3.35241	3.57286	3.29891	3.08208	3.61645	3.15587	2.6559	3.23148	3.32995	3.17183	3.71186	2.98947	2.99297	3.1805	3.44803	3.23214	3.38656	3.3572	2.71927	3.59428	3.28782	3.17693	3.18307	3.44416	3.56154	-0.0393729	3.27455	-0.41758	0.679129	0.807345	-6.27459
ARHGAP24	3.13526	3.04333	2.3704	3.03256	2.45479	2.54617	2.22753	2.71432	2.71325	2.60309	3.07903	1.91231	3.067	3.02089	3.1825	2.85124	3.09563	2.20159	2.40032	2.43922	2.38614	2.17361	1.24131	3.01252	1.7907	1.77854	3.57938	2.1129	3.05365	0.420114	2.59377	2.35951	0.0247703	0.102483	-3.80264
ARHGAP26	2.29489	2.04129	2.18946	2.42597	2.06784	2.3822	2.42628	2.7362	2.90492	2.62809	1.9607	2.83189	1.77854	2.07635	2.23677	2.24792	2.05267	2.13224	2.10719	2.3421	2.22122	2.0809	2.08781	3.4182	2.19729	2.49393	2.5014	1.75661	2.17467	0.0179077	2.3033	0.13676	0.892104	0.941847	-6.35234
ARHGAP29	3.46084	3.62673	3.55273	3.4312	3.50718	3.61065	2.95449	3.74807	3.19561	3.30629	3.10829	3.55859	3.33968	3.1332	3.67111	3.41724	3.50718	3.7652	3.63498	3.50458	3.44954	3.42008	2.91874	2.95953	3.56909	3.67615	2.93942	3.77251	3.24027	0.0151841	3.41307	0.151801	0.880327	0.934116	-6.35017
ARHGAP35	2.22799	2.33808	1.90754	2.20209	2.03566	2.04906	2.34044	1.47615	1.79831	2.12194	1.61804	1.9607	2.38297	2.78165	2.17361	2.41524	2.71186	2.28105	1.8126	2.3436	2.29312	2.35012	2.58378	2.26288	2.65221	2.13224	2.49684	2.53478	2.6668	-0.218013	2.2397	-1.90616	0.0659282	0.193491	-4.64304
ARHGAP5	3.58807	3.55918	3.57791	2.88652	3.25588	3.12534	3.18839	2.72006	3.02169	2.7922	3.55479	3.32827	2.77342	3.08208	2.92302	2.76293	3.27884	3.2756	3.10102	3.35929	3.08965	3.16084	2.82408	3.47261	3.53715	2.9561	3.38142	3.49791	3.66183	-0.13419	3.1978	-1.24713	0.221681	0.411866	-5.60189
ARHGAP6	1.88307	2.62609	2.32844	2.02481	2.20061	2.23728	2.0337	1.21651	2.5997	2.7969	1.37954	2.08223	2.67811	2.49292	1.95759	2.50869	2.74947	1.76217	2.41308	2.03435	1.61804	1.7873	1.75958	2.15734	2.3559	2.82223	2.11478	2.71265	1.94184	0.100004	2.18189	0.645327	0.523458	0.693325	-6.15448
ARHGDIA	3.36384	3.19458	2.8863	3.30217	2.95817	2.88261	3.13017	3.1454	2.61702	2.99941	2.19153	2.37164	3.46379	3.58421	3.29556	3.61862	3.35599	3.2974	3.05691	3.24321	3.16818	3.35122	4.02575	2.46027	3.20923	3.64315	2.58127	3.21605	2.32142	-0.0511135	3.10121	-0.323413	0.748552	0.849737	-6.30939
ARHGDIB	2.81062	2.91329	3.16912	3.30152	3.58467	3.37633	2.70071	4.48118	3.98303	4.092	3.81072	3.27801	3.76019	3.16761	3.52585	3.50209	3.31772	3.45295	3.32555	3.05259	3.08261	2.97987	2.98608	2.19678	2.07919	2.81868	2.39353	2.2609	2.073	0.732188	3.15436	4.23565	0.000188685	0.00511889	0.677266
ARHGEF10	2.61908	2.77697	2.59619	3.018	2.91874	2.95131	3.08261	2.77697	3.14026	2.57784	1.9884	3.20601	3.06387	2.36805	2.82408	2.45755	2.87591	2.71296	3.13928	2.72399	2.63739	2.60777	2.36437	2.82009	3.05922	2.72279	3.36664	2.85869	3.1469	-0.0677439	2.80696	-0.600279	0.55268	0.715691	-6.18224
ARHGEF10L	3.12649	3.29073	3.22142	3.05227	2.97322	3.13113	3.1995	3.40352	3.13846	2.94024	3.35198	3.27981	2.75712	2.8272	2.71215	3.19732	2.77119	2.90656	3.04752	3.05746	3.19702	3.34239	2.91132	2.90621	3.16372	2.97214	3.13135	2.82198	3.66506	-0.012752	3.08609	-0.146403	0.88455	0.936593	-6.35098
ARHGEF11	2.72704	2.46706	2.43565	2.50869	2.15477	2.21451	2.47968	2.21604	1.89725	2.05201	2.39353	2.20273	3.06996	3.47962	3.08133	3.18536	2.85384	2.60331	2.63142	2.64503	2.66742	2.3101	3.12094	2.93761	2.19323	1.69493	2.34666	2.1083	2.44265	0.0789309	2.5214	0.517369	0.608568	0.754539	-6.22819
ARHGEF12	4.05582	3.86917	3.76295	3.67545	3.59621	3.75698	3.49596	2.50596	3.34811	3.23707	3.29009	2.99864	3.87172	3.7088	4.00798	3.69994	4.0329	3.69218	3.6771	3.65661	3.74899	3.6808	3.6771	3.75414	3.6143	3.39367	3.38945	3.74899	3.97041	-0.0838163	3.61784	-0.690458	0.495039	0.673011	-6.12472
ARHGEF15	3.17753	2.76611	2.51661	2.98012	2.65652	2.95757	2.99371	3.08488	3.83114	3.81183	3.51852	3.71379	2.45583	2.24525	2.14573	2.21604	2.0063	3.12955	3.10346	2.97817	3.16592	3.20223	2.7788	3.01125	3.20482	3.46952	2.57864	3.14146	2.70391	-0.152065	2.94983	-0.878793	0.386268	0.581213	-5.97965
ARHGEF17	3.58144	3.54783	3.41368	3.54439	3.19097	3.43596	3.60458	3.20859	3.38184	3.29246	3.19032	3.19598	2.71032	3.26154	3.22771	3.48064	3.48217	3.6771	3.17985	3.29047	3.65339	3.60865	3.16791	3.27853	3.37157	3.7288	3.45397	3.60195	3.53617	-0.124105	3.38961	-1.49048	0.146194	0.318877	-5.28779
ARHGEF18	2.67094	2.84582	2.60602	2.7907	3.0832	2.78885	2.69302	3.44532	3.10079	3.42276	3.1825	2.72202	2.91664	2.57146	3.06748	2.38527	2.49425	2.72751	2.72751	2.45015	2.61379	2.52797	2.52478	2.33979	2.32592	2.79198	2.08719	2.86626	2.57546	0.3233	2.73605	3.10486	0.00404433	0.0326357	-2.17367
ARHGEF2	2.7925	2.8702	2.80375	3.00346	2.69331	3.15369	2.7907	2.65168	2.73132	2.71186	2.41524	2.63974	3.45295	3.09533	3.15057	2.93517	2.92168	3.07653	3.192	2.90172	2.73998	2.69964	2.86176	3.18608	2.64867	2.84216	2.98416	2.89326	2.64446	-0.0178411	2.87874	-0.203201	0.840304	0.911877	-6.34104
ARHGEF40	2.50408	3.31543	2.49425	2.68165	2.79325	2.48339	2.30462	2.28288	2.92435	2.09456	2.68771	2.1852	2.80921	2.33891	2.50079	2.82505	2.70762	2.12741	2.8362	2.07488	2.39467	2.47493	2.78211	1.92424	2.32673	3.09449	2.81649	3.13347	2.50376	0.0435101	2.56629	0.342452	0.73432	0.840522	-6.30307
ARHGEF6	3.18937	3.89694	3.40647	3.43172	3.37356	3.6323	3.26004	3.15926	3.69637	3.40647	3.64315	3.10376	3.07291	3.33762	3.61065	3.04851	3.27189	3.20701	3.14297	3.14596	3.52716	3.3794	3.33203	3.33641	3.1805	2.64729	3.22498	2.79048	3.87477	0.152351	3.32172	1.46693	0.152458	0.327951	-5.32033
ARHGEF7	3.30584	2.9962	2.82271	3.12147	2.90038	3.07792	2.99348	2.71504	3.10102	3.01359	2.65482	2.69652	2.75682	2.94187	3.72613	2.70549	2.67008	2.80945	3.12147	2.9864	2.97742	2.92003	2.80735	2.77342	3.1713	3.14481	3.39825	3.03014	2.88681	-0.0493317	2.97332	-0.531424	0.598909	0.748362	-6.22087
ARHGEF9	3.60322	3.7511	3.55146	3.71637	3.48015	3.56829	3.27773	2.90734	2.96115	3.03682	3.57218	3.19755	3.51995	3.56095	3.50458	3.43672	3.48064	2.96488	2.85044	3.27523	3.22915	3.20415	3.24429	3.65125	2.46199	2.86818	3.55797	2.83503	3.61355	0.272846	3.30629	2.41963	0.0215871	0.0933217	-3.68171
ARID1A	3.23609	3.33806	3.37535	3.42092	3.15675	3.46084	3.40951	2.7699	2.71953	2.67579	2.56671	2.59332	4.0329	4.23489	3.86124	3.71186	4.00982	3.36748	3.49053	3.40212	3.46693	3.3313	3.49053	3.52969	3.32911	2.75465	2.82862	3.20828	3.03889	0.0580055	3.30385	0.362923	0.719123	0.831135	-6.29586
ARID4A	2.51661	2.45921	2.53917	2.58244	2.46315	2.33891	2.44917	2.44854	2.45196	2.28902	2.30675	2.01178	2.60872	2.65268	2.61056	2.56924	2.58991	2.27172	2.37559	2.40667	2.19489	2.36608	2.21766	2.83968	2.44917	2.44787	2.46127	2.87467	2.35268	0.0258262	2.4533	0.346236	0.731502	0.8394	-6.30177
ARID4B	2.58737	2.80044	2.70897	2.7369	2.87817	2.70193	2.67439	2.8126	3.10513	2.62529	2.52695	2.15365	3.2612	2.67639	3.10967	3.25933	2.58764	2.54617	2.59774	2.6057	2.70044	2.55042	2.4373	2.9718	2.53587	2.25147	2.55176	2.71744	2.59219	0.188632	2.69877	2.02093	0.0519873	0.163865	-4.44292
ARID5B	3.71073	3.342	3.9654	4.01759	3.67286	4.47613	4.30958	3.30411	3.58356	3.7456	3.19168	2.42519	3.36418	5.14564	3.61785	3.57408	3.52216	2.95055	4.23753	3.88363	3.59428	3.29779	3.51995	3.56697	4.79923	3.31271	3.10234	4.33839	2.90535	0.0782934	3.67162	0.371641	0.712686	0.82634	-6.29267
ARIH1	2.88462	2.90977	3.12779	2.94967	2.60487	2.98467	2.94455	2.88287	2.94909	2.88935	3.08824	2.78003	2.75964	2.68489	2.7323	2.74607	2.79271	2.77612	2.94054	2.76891	2.9481	3.00121	2.50768	2.89854	3.18773	2.98608	2.85069	3.03554	3.07343	-0.0491887	2.88571	-0.742787	0.463197	0.647644	-6.08777
ARIH2	2.947	3.30217	2.60721	2.92718	2.85248	2.99514	3.20764	2.18001	2.79666	2.27308	3.13928	3.02621	2.76634	3.01551	3.01551	2.80473	3.05536	2.96029	2.40459	3.02828	3.09505	2.75264	2.85248	2.55331	2.8232	2.87264	3.02744	3.61988	3.06356	-0.0439659	2.89534	-0.392686	0.697236	0.816762	-6.28465
ARL1	2.75964	2.80839	2.77472	2.51783	2.68579	2.5034	2.74897	2.73022	2.63336	2.45296	2.80822	2.92083	2.29172	2.68195	2.42761	2.51698	2.8232	2.48762	2.40751	2.54834	2.47653	2.61796	2.67117	2.64057	2.62087	2.88734	2.67346	2.51544	2.61345	0.0554168	2.62917	0.840526	0.407044	0.598725	-6.01182
ARL15	2.18573	2.21939	2.03506	2.23728	2.25326	2.44154	2.02179	2.02642	2.17634	2.72832	2.67811	2.46088	1.84228	1.8291	2.55763	2.23728	2.12317	2.38912	2.49425	2.2553	2.3837	2.54925	2.26374	3.06055	2.35811	2.60082	1.88543	2.97711	2.59187	-0.245659	2.3401	-2.29141	0.0288869	0.111322	-3.93709
ARL2BP	3.44315	2.83968	3.42685	3.47218	3.4006	3.26547	3.38656	3.37444	3.25183	3.3295	3.59981	3.52349	2.85711	2.77774	2.7917	2.73103	3.2147	3.40609	3.25549	3.26674	3.47962	3.46589	3.043	2.87921	3.38027	3.6808	3.31772	3.60999	3.34159	-0.127054	3.26939	-1.25551	0.218666	0.409257	-5.5919
ARL3	2.80208	2.70071	2.73132	2.94858	3.18965	2.39686	2.97961	3.01596	2.54095	2.83427	2.7321	3.01305	2.89224	3.26237	3.01979	2.93714	2.6075	2.89772	2.92561	2.96189	2.64351	2.76962	2.85869	3.07059	2.20757	2.68516	3.25588	2.45893	2.62696	0.0788903	2.82642	0.826654	0.414745	0.604868	-6.02315
ARL4C	2.13342	2.19053	2.13833	2.3865	2.7876	2.57186	2.10319	3.86503	3.52402	3.28245	3.18363	2.27598	3.12002	1.75661	2.97433	2.67837	1.59332	2.88462	2.92888	3.00234	2.65764	2.28068	2.77398	1.32983	2.89281	2.85044	3.02909	2.45366	1.47945	0.0745295	2.59064	0.341331	0.735155	0.840686	-6.30345
ARL4D	2.6955	2.52362	2.57749	3.01718	2.64032	2.83796	2.93714	2.71534	2.83296	3.19322	2.53254	3.54365	3.28363	2.32844	2.91874	3.08989	2.13224	2.8158	2.83061	3.076	2.78362	2.94676	2.35884	2.19888	3.36077	2.82348	2.57076	3.18669	2.70248	0.00719977	2.80878	0.0568416	0.955036	0.974151	-6.36009
ARL5A	3.72693	3.53962	3.51504	3.59763	3.60805	3.62819	3.6323	3.45097	3.49392	3.33481	3.81424	3.63707	3.49277	3.56697	3.30114	3.422	3.48846	3.78684	3.74167	3.46277	3.90258	3.63295	3.31627	3.72693	3.53668	2.9864	4.07517	3.38829	3.29073	-0.0264831	3.55508	-0.311487	0.757514	0.855931	-6.31318
ARL6IP1	2.44484	2.53445	2.6097	2.43993	3.13995	2.69964	2.70496	3.0057	2.85577	3.15432	2.73103	2.67036	2.88287	2.38409	2.79325	2.39134	3.00857	2.27122	2.86626	2.45722	2.24666	2.0188	2.43327	2.79297	2.52112	2.19729	2.0331	2.39721	2.23677	0.35974	2.58354	3.68735	0.000862857	0.0132914	-0.745916
ARL6IP5	3.70503	3.63433	3.90888	3.93619	4.02947	3.91275	3.81552	3.78002	3.87734	3.90128	3.71718	4.24965	3.192	3.45143	3.41319	3.23849	3.61355	4.02575	3.93768	3.80141	3.99185	3.79589	3.46379	3.89415	3.78922	3.64237	3.8956	3.57044	3.87037	-0.0785261	3.76051	-0.844727	0.404729	0.596161	-6.00836
ARL8B	3.79033	3.68255	3.87037	3.62748	3.76019	3.84554	3.66109	3.47906	3.56635	3.56985	3.56985	3.68404	3.32911	3.52532	3.32286	3.48493	3.62112	3.80245	3.47962	3.44747	3.75414	3.76019	3.397	3.97991	3.79915	3.19458	3.40517	3.51852	3.63498	0.0134148	3.60563	0.176038	0.861408	0.924839	-6.34619
ARMC1	3.00379	3.29482	3.20601	2.51661	2.76914	3.08629	2.61082	2.80839	2.85711	2.50111	3.32413	3.39406	3.07122	3.00433	2.85464	2.95846	3.21748	3.12503	2.95791	3.07653	2.73849	3.12207	2.90792	2.91821	2.82171	2.53036	2.82223	2.55434	3.22267	0.0695291	2.94055	0.719268	0.477358	0.658829	-6.1047
ARMC6	2.55792	2.5313	2.62116	2.93891	2.4093	2.54543	3.08767	2.88709	2.4458	3.18773	2.41453	3.35765	1.80256	2.32424	1.90549	2.23171	2.24049	2.83427	2.72601	2.57838	2.59532	2.82862	2.7917	2.40349	3.2117	3.24056	2.71479	3.4986	2.87702	-0.300197	2.68239	-2.14545	0.039852	0.136503	-4.21582
ARMCX1	3.48554	3.43596	3.31588	2.59245	3.25807	2.79995	3.38142	3.01521	2.92743	3.0703	3.06087	3.48064	2.92842	3.12147	2.96029	2.57926	3.23817	3.53095	3.03432	3.37444	3.2974	3.29437	3.19561	3.14297	3.21647	3.24635	3.62529	2.77612	3.55975	-0.177366	3.17053	-1.76508	0.0873919	0.232123	-4.87636
ARMCX2	3.2287	3.53503	3.47392	3.20318	3.13685	3.57609	3.38568	3.33407	3.25011	3.54896	3.63078	3.18636	3.22267	3.45658	3.45143	3.25432	3.56436	3.6143	3.20258	3.43076	3.1185	3.44215	3.18503	2.87315	3.25045	2.92083	3.56511	2.24099	3.48601	0.184615	3.30238	1.78474	0.0840838	0.226089	-4.8447
ARMCX3	3.28482	3.7948	3.70331	2.93911	3.26583	3.20091	3.04912	3.17546	3.65757	3.69135	3.8095	3.78104	2.61434	2.86034	2.4978	2.52629	2.7323	3.20764	3.07343	3.09871	3.11081	3.35673	2.76324	3.02259	3.1745	3.02031	3.57286	3.11452	3.81424	0.0166845	3.20391	0.114502	0.909578	0.951636	-6.35514
ARMCX5	2.4437	2.30379	2.37797	2.49455	2.69845	2.32306	2.46511	2.79048	2.67148	2.92198	2.92665	2.71265	2.29442	2.57658	2.27172	2.01178	2.40524	2.52362	2.33002	2.61465	2.54683	2.34802	2.50631	2.25478	2.70103	2.77049	2.90062	2.16034	2.18903	0.0240074	2.50122	0.256593	0.799186	0.884429	-6.32876
ARMCX6	3.39048	3.49596	3.19364	3.31543	3.79237	3.68404	3.1926	3.37248	3.40467	3.41004	3.66944	3.81923	3.47661	3.13815	3.44265	3.2303	3.04416	3.60805	3.38618	3.53311	3.4837	3.43172	3.35198	3.14627	2.83923	3.05513	3.89273	2.89772	3.46952	0.0747366	3.38509	0.753655	0.456737	0.6424	-6.07977
ARMH3	2.70577	2.38527	2.58244	1.93423	3.09691	2.26654	2.82558	2.23412	2.02342	2.34442	2.54009	2.49361	2.33769	2.56402	2.61022	2.4134	2.63062	2.17191	2.82144	2.10003	2.64808	2.96749	2.63927	2.79325	2.57574	2.86549	2.92595	3.03343	2.57986	-0.206927	2.55553	-1.92076	0.063991	0.189388	-4.61807
ARMT1	1.90642	2.18742	2.54683	1.35171	2.21982	1.90016	1.77551	2.1585	1.6609	1.78848	2.61993	2.99427	1.89914	2.23677	2.2838	2.09687	2.37079	2.55827	2.1818	2.26802	2.17682	2.20273	2.19053	2.7621	2.42344	1.753	2.42661	2.06721	2.5034	-0.175339	2.19004	-1.37465	0.179087	0.359318	-5.44344
ARNT	1.74762	2.43259	1.95592	1.99011	2.3183	1.99011	2.14469	2.52289	2.15913	2.07097	2.44195	2.1585	2.27821	2.4437	2.09622	2.18742	2.42239	2.09687	2.09275	2.20273	2.3873	2.36224	2.00483	2.58653	2.31371	2.26654	2.32385	2.34044	2.14746	-0.0627479	2.22365	-0.806888	0.425872	0.615174	-6.03898
ARPC1A	3.20732	3.37589	3.03682	3.19815	3.33848	3.46486	2.98947	2.87795	2.8272	2.76671	2.70549	3.38255	3.32499	3.39275	3.45295	3.23957	3.57104	3.38518	3.62603	3.15559	3.38478	3.40828	3.32169	3.4973	3.16266	2.96189	3.3444	2.78135	3.51504	-0.109927	3.23091	-1.12066	0.271032	0.468443	-5.74523
ARPC1B	2.59332	2.55792	2.63974	2.80018	2.84988	2.58602	2.51378	3.71812	3.13113	3.32634	2.91104	2.63903	3.57104	2.54095	3.06876	2.95282	2.40896	3.08156	3.06474	2.79485	3.0469	2.93714	3.31543	1.753	2.7699	3.05746	2.18346	2.63448	2.1698	0.137057	2.8144	0.899717	0.3752	0.572618	-5.96148
ARPC2	2.96686	3.10967	3.04789	3.06967	3.24807	3.10049	2.91462	3.4986	3.0622	3.09357	3.02031	2.72089	3.02323	2.94325	3.04885	3.31463	3.01949	3.26743	3.24127	3.16723	2.8032	3.26402	3.18363	2.53757	3.0874	3.20923	2.87293	3.14511	2.85248	0.0180975	3.06323	0.229646	0.819874	0.898477	-6.33531
ARPC3	2.42239	2.65876	2.61496	2.22222	2.61314	2.36066	2.14928	3.29357	2.76891	2.94054	2.97796	2.60409	2.18862	2.1292	1.94526	2.16034	2.23064	2.68462	2.55938	2.20159	2.15913	2.81788	2.39541	2.00729	2.65652	2.97433	2.35669	2.79505	2.58296	-0.0288152	2.49901	-0.230763	0.819014	0.898121	-6.33505
ARPC5L	3.39785	3.60386	3.22803	3.36532	3.20567	3.35374	3.22307	2.72168	2.91922	2.73417	3.33407	3.19999	3.21788	3.342	3.3996	3.37633	3.59559	3.18175	3.31588	3.44642	3.17157	3.47582	3.24635	2.47396	3.84554	3.41268	3.13651	3.25588	3.36198	-0.0289052	3.26008	-0.27475	0.785329	0.876105	-6.32394
ARPP19	3.07836	2.92786	3.19097	3.10885	3.00968	3.01382	3.05469	2.62749	2.60632	2.75264	2.7447	2.90535	3.0115	3.16441	2.90512	2.83871	3.07769	3.1773	2.9526	3.02169	3.01279	3.26961	3.18704	2.92361	3.19393	3.16051	3.05	3.32749	3.24429	-0.184491	3.01859	-2.72991	0.0103459	0.0576266	-3.02648
ARRB1	2.82666	2.78533	2.72035	2.96189	2.82452	2.90927	2.78662	3.40256	3.05338	3.16912	1.89323	2.91411	2.81761	2.39317	2.59619	2.46605	2.05781	2.8275	2.76262	2.80867	2.778	2.93517	3.29629	3.02232	3.01979	2.97902	2.97657	2.85151	2.79123	-0.18085	2.81471	-1.59258	0.12139	0.282896	-5.14162
ART3	3.4006	3.46136	3.1057	3.37589	2.96604	3.79915	3.9465	1.74091	2.43497	1.67499	3.08107	4.25785	3.26743	4.59827	3.39275	3.48704	4.04274	4.05919	3.95427	4.87053	4.02947	3.01771	3.45097	3.71637	3.67884	4.41671	3.74263	3.91996	3.75414	-0.58816	3.53945	-2.44899	0.020172	0.0893566	-3.62189
ASAH1	4.98887	4.8958	4.8958	4.97369	4.94338	5.02671	4.76685	4.63567	4.60506	4.44007	4.8958	5.37873	4.05218	4.02696	4.29884	4.10004	4.17895	4.70878	4.7882	4.7882	4.81824	4.76685	4.30958	3.97569	4.67629	4.73762	4.61256	4.69933	4.77837	0.0148319	4.647	0.1155	0.908793	0.951546	-6.35503
ASAP1	3.05444	2.79666	3.30188	2.75022	2.56422	3.01619	2.87921	2.72202	2.66947	2.41233	2.47933	1.99994	3.49111	3.44803	3.75698	3.38829	3.53569	2.30335	2.69797	2.36394	2.7788	2.7961	3.15119	3.03503	2.25379	2.54263	2.02277	2.50408	2.14012	0.407676	2.78813	2.61756	0.0135673	0.0685025	-3.26949
ASAP2	2.56607	2.84244	2.44407	2.78058	2.96911	2.57838	2.80265	2.58035	2.87492	2.59774	2.67254	2.89604	2.87949	2.43955	2.46706	2.37649	2.69302	2.25045	2.7095	2.60931	2.48863	1.69984	2.59219	2.3448	2.67376	2.54456	2.25478	2.90199	2.64729	0.197723	2.59233	2.11057	0.0429679	0.144098	-4.28044
ASAP3	3.47764	2.86678	3.07423	3.43028	3.07122	3.58938	3.10259	3.43323	2.97629	2.71642	2.95282	3.50573	3.04789	2.95846	3.01359	3.45542	3.28482	3.5067	3.36578	3.37589	3.38994	3.46326	3.09177	3.46486	3.37684	3.08156	3.66412	2.85355	3.40467	-0.162651	3.24123	-1.72147	0.0951215	0.243984	-4.94553
ASB1	2.65847	3.00121	2.76185	2.7323	2.49223	2.67254	2.60515	2.05706	2.45015	2.16034	2.09812	2.46511	2.97775	3.04485	2.73897	2.79048	3.58542	2.80396	2.75843	3.05616	2.71432	2.68637	2.86926	2.64646	2.3991	3.13165	3.1499	3.04416	2.63006	-0.159916	2.73041	-1.32102	0.196155	0.381739	-5.51175
ASB8	3.02373	2.8629	2.95874	3.40828	2.85869	3.20258	3.0747	2.82036	3.03374	2.93788	3.1182	3.66688	2.31938	3.22629	3.02429	2.93126	2.78913	3.2814	3.24507	3.36709	3.2707	3.04629	2.94301	3.37068	2.94566	2.86602	3.31159	3.00968	3.57472	-0.170874	3.08583	-1.72595	0.0943019	0.242785	-4.93849
ASB9	2.02891	1.82788	1.71328	2.0497	1.99082	1.90144	1.91321	2.86317	1.76217	3.2651	2.65084	2.57014	2.16278	1.2853	4.50264	2.09749	1.24131	2.19635	2.26937	2.09749	2.08504	1.9932	1.63552	1.57163	1.4186	1.92511	1.42497	1.5367	5.37873	0.0973442	2.18479	0.302088	0.7646	0.861973	-6.31606
ASCC1	2.97293	3.26583	3.11607	3.05922	3.21605	2.8626	3.27981	2.86653	2.44854	2.97961	2.64385	2.81898	3.59211	3.33331	3.39922	3.25118	2.83821	3.43076	3.14026	3.30518	2.93298	3.23577	3.1332	2.81708	2.97271	3.46693	3.14449	3.42092	2.92117	-0.104589	3.09881	-1.04118	0.305836	0.505371	-5.8281
ASCC2	2.87209	2.90512	2.79634	2.91437	2.4283	2.75465	2.74995	2.1292	1.93237	2.17531	2.57864	1.8291	3.14655	3.8911	3.32591	3.26923	2.80375	2.37884	1.99842	2.16795	2.55938	2.83263	3.38102	2.8399	1.97299	2.25679	2.4373	2.55011	2.46572	0.248657	2.63252	1.43839	0.160334	0.337606	-5.35915
ASCC3	2.97681	3.17075	2.98663	2.89168	2.98386	3.11452	2.85745	3.44215	3.20512	3.10234	3.75414	3.00545	2.65291	2.81062	2.85355	3.89415	2.49845	2.8311	2.31194	2.6075	2.72627	3.09817	2.33846	2.59017	2.70762	2.55265	2.90492	2.32467	2.61908	0.436246	2.89011	3.73396	0.000759833	0.0123196	-0.627423
ASF1A	2.23171	2.36971	2.59835	2.37363	2.52662	2.10056	2.26422	2.40273	2.64808	2.74967	2.25845	2.5109	2.61615	2.96029	2.68308	2.83891	2.85897	2.46352	2.13833	2.74084	2.22602	2.58067	2.66924	2.99539	2.36929	1.84657	2.19489	1.6425	2.15164	0.194033	2.44865	1.6866	0.10171	0.253833	-4.99984
ASH1L	2.80505	2.19888	2.65706	2.65054	2.17296	2.61734	2.69436	3.14176	2.97875	3.02232	3.15178	2.58737	2.11933	2.47465	1.57382	2.18903	1.85288	2.85577	2.52729	2.88212	2.76349	2.7609	2.0723	2.63336	3.08434	2.93891	2.95975	3.1054	3.20155	-0.292614	2.6439	-2.02164	0.05191	0.163716	-4.44165
ASH2L	3.18071	2.99699	2.97572	3.25833	3.29155	3.16791	3.04967	2.96991	2.89693	2.94887	3.11973	3.30443	2.95449	3.11973	3.12717	2.80128	2.96604	3.07519	2.99699	3.15797	3.01252	3.08107	3.11571	3.26999	2.70248	2.92223	3.32136	2.90145	3.10443	0.0113243	3.06175	0.172002	0.864553	0.926027	-6.34689
ASL	2.25095	2.05706	2.09204	2.21604	2.1155	1.99518	2.29212	2.0446	2.02741	2.15292	1.60646	2.02179	2.71827	2.75264	2.89693	2.49613	2.52904	2.22081	2.55331	2.51445	2.36881	2.19888	3.08712	2.79271	1.96756	2.5298	2.05635	1.92238	2.30123	-0.125229	2.30271	-1.01248	0.319139	0.519173	-5.85664
ASMTL	3.00777	2.91841	2.70627	3.06356	3.05948	2.97048	2.91002	2.44986	1.8126	2.20375	1.94809	2.23019	2.83369	3.6323	2.98096	3.29073	3.50573	2.08914	2.36066	2.36109	2.14288	2.6869	3.30808	3.02458	2.1372	2.73564	2.32064	2.5294	2.76611	0.256996	2.68918	1.53869	0.134015	0.301101	-5.2198
ASNS	1.90831	2.05422	3.09871	2.44024	2.05635	2.50832	2.00402	3.03282	2.87615	2.68134	2.4783	1.64419	3.11142	1.64074	2.39616	2.97961	2.34402	1.87399	1.5367	1.92424	1.8795	1.98027	1.56199	1.64927	2.32385	2.17241	2.39284	1.78937	2.36437	0.472695	2.23116	3.07945	0.00431681	0.0336012	-2.23333
ASNSD1	2.52607	2.53223	2.83503	2.60602	2.8399	2.58991	3.00622	2.4729	2.59476	2.78714	2.58878	3.06356	2.05781	2.88734	2.62841	2.67691	2.71853	2.94325	2.72856	2.82975	2.81536	2.66329	2.7959	2.98608	3.17103	2.65682	2.84628	2.931	2.6081	-0.16002	2.73748	-1.9611	0.0588942	0.179313	-4.54836
ASPH	2.88287	2.75071	2.7065	2.87752	2.66184	2.38689	2.69195	2.75578	2.711	2.69279	2.98072	2.96	2.65268	2.67195	2.73718	2.90115	2.73283	2.69797	2.61854	2.6543	2.66437	2.62057	2.47172	2.66648	2.74776	2.13833	2.96547	2.58968	2.7611	0.117231	2.70175	1.69413	0.100257	0.251704	-4.9882
ASPN	3.93202	4.35655	4.12238	5.23293	5.06886	4.48118	3.66776	4.21005	5.26827	5.68045	5.02671	4.02575	5.04478	2.79146	4.10414	4.70878	4.69158	2.9121	2.51544	2.42344	3.91396	3.47011	3.15587	3.24282	2.02024	1.96924	2.41032	2.34849	2.87467	1.72353	3.78174	7.27103	3.49e-08	5.2e-05	8.7899
ASS1	2.4606	3.27523	2.52417	2.70193	2.92384	2.65349	3.23357	2.83531	2.73543	2.84937	3.40567	2.26506	2.5673	2.82171	2.3712	2.38988	3.2651	3.08208	3.59091	3.48704	2.89495	3.08488	3.61065	1.90144	2.76293	3.86124	3.05948	3.77023	3.24725	-0.414979	2.95282	-2.63346	0.0130609	0.0666864	-3.23549
ASXL1	2.73417	2.56339	2.42447	2.77371	2.36559	2.64057	2.70157	3.04212	2.5498	2.83891	3.06559	2.43292	2.43215	2.39686	2.51661	2.61941	2.63365	2.47076	2.59709	2.51636	2.71827	2.7095	2.56857	2.26802	2.84835	2.76831	2.4729	3.02477	2.41753	0.0162261	2.62455	0.196271	0.845678	0.915703	-6.34242
ASXL2	2.93788	2.84427	2.99699	3.31929	3.39623	3.13741	3.05781	3.46785	3.5015	3.36578	2.59647	3.50046	2.86796	3.15023	3.24321	3.1054	2.8629	2.94887	3.00408	2.93408	2.95158	3.09719	2.5746	3.13266	3.25833	2.24251	3.07233	2.61734	2.80293	0.251959	3.03407	2.43899	0.0206444	0.0907121	-3.64233
ATAD2	1.88543	1.53101	1.81128	1.74248	1.7148	1.93334	2.07635	2.31331	2.02106	2.55763	1.89224	1.66683	2.19635	1.91639	2.93738	1.38329	1.84451	2.20867	1.70858	1.99842	2.03506	2.04378	1.72543	2.23959	2.19774	1.44669	2.35511	1.79583	3.30736	-0.122424	2.01676	-0.811657	0.423171	0.612895	-6.03519
ATF1	2.4188	2.88212	2.2865	2.28564	2.76324	2.62923	2.13289	2.54009	2.71722	2.69172	2.57281	2.83088	2.14573	2.16854	1.94348	1.86094	2.13892	2.42239	2.26802	2.1058	2.29522	2.40964	2.43993	2.14799	2.75761	2.88969	2.29798	3.20764	2.72089	-0.0846197	2.4473	-0.707213	0.484712	0.664437	-6.11317
ATF2	2.3421	2.30029	2.31896	2.17296	2.28068	2.11369	2.29986	2.20757	2.2594	2.09129	2.3101	2.32021	2.47007	2.43078	2.44195	2.31938	2.56023	2.2043	2.15628	2.2102	2.22414	2.24915	2.11478	2.68798	2.50736	2.19053	2.26751	2.43359	2.28564	0.0139173	2.30245	0.222887	0.825084	0.901098	-6.33684
ATF4	3.16654	3.04967	2.98096	3.56233	3.14571	3.39922	3.2532	3.14366	2.9702	2.87396	2.9499	2.58536	2.98318	3.1549	2.68134	3.04885	3.30483	3.37305	3.35198	3.57472	3.33679	3.19815	3.40517	2.46199	4.45466	3.85039	3.10829	3.83855	2.89665	-0.330444	3.21049	-2.42854	0.0211484	0.0921106	-3.66361
ATF5	3.02477	3.06274	3.1469	3.2198	3.02887	3.10935	2.98038	3.74263	3.3624	2.92842	3.92495	2.88515	3.02708	3.05365	2.91329	3.2756	3.01871	3.39998	3.22055	2.98072	2.89604	2.80449	2.95055	2.55265	2.7098	2.82408	2.89251	3.04721	2.4905	0.261676	3.05082	2.53287	0.0165847	0.0781072	-3.44842
ATF7IP	1.99616	2.22924	2.16854	2.25763	2.20636	2.12986	2.19888	2.63365	2.61465	2.26557	2.68195	2.65789	2.15094	2.2594	2.2594	2.4642	2.47623	2.28288	2.21939	2.34802	2.2043	2.13174	1.72395	2.80505	1.89822	1.90229	2.61496	2.05422	2.35145	0.121012	2.28231	1.25111	0.220243	0.410903	-5.59714
ATF7IP2	2.79845	2.85015	2.88236	2.97742	2.45513	2.95449	2.6331	2.60103	2.81761	1.89619	3.12175	2.65189	3.00912	3.04132	3.29482	3.11393	2.84477	3.09662	2.67117	2.87293	2.66212	2.74522	2.53971	2.85897	2.47253	2.76044	2.48493	3.11167	2.9037	0.055207	2.79736	0.521739	0.605556	0.752873	-6.22593
ATG12	1.9614	2.1759	1.99256	2.10003	2.39387	2.06213	1.9361	2.47197	2.27122	2.38988	2.08156	2.50238	2.1155	2.10251	1.59332	1.67991	2.10649	2.33222	1.93516	1.89914	1.83511	1.94629	2.06031	1.86849	2.5683	2.39504	2.22799	2.58127	2.42976	-0.0593316	2.13848	-0.595074	0.556109	0.718252	-6.18532
ATG13	3.41687	3.10014	2.99221	3.31038	3.0584	3.12066	3.24027	2.8476	2.99889	3.00622	2.84324	2.72354	3.62463	3.42595	3.22081	3.03554	3.07204	3.18704	2.87339	3.06334	3.22111	3.06785	3.02373	3.25393	2.58878	2.83088	3.47435	3.08156	3.01822	0.0628324	3.09385	0.705255	0.485912	0.665171	-6.11454
ATG14	2.79535	3.04885	3.29246	3.17217	3.0469	3.29047	3.14868	3.00433	2.91841	2.90713	2.64949	3.47303	3.46326	3.23928	3.30188	2.86749	2.87492	3.06248	3.2476	3.06907	3.05388	2.74172	2.56635	3.7288	3.07867	2.46277	2.53276	2.30839	4.24965	0.0793759	3.05504	0.546115	0.588892	0.741414	-6.21301
ATG2A	2.61644	2.65706	2.47107	2.4134	2.28857	2.56607	2.66833	2.41269	2.47465	2.20061	2.02024	2.19635	2.5711	2.67168	2.7611	2.97271	2.4458	2.51973	2.4167	2.5475	2.56671	2.6611	2.86818	2.7013	2.53819	2.5746	2.87642	2.79634	2.48863	-0.135036	2.55046	-1.66866	0.105245	0.258776	-5.02741
ATG2B	2.19729	2.30504	2.46854	2.33403	2.12141	2.35811	2.34666	2.59187	2.6044	2.32795	2.53004	2.46854	2.13892	2.19323	2.1372	2.2043	2.2778	2.1692	2.08291	2.26895	1.99689	2.3088	2.01098	2.29172	2.16498	2.44088	2.5141	2.56955	2.60906	0.0440581	2.3115	0.596219	0.555353	0.717756	-6.18465
ATG3	2.81602	2.98175	2.8275	2.73564	2.73849	2.53618	2.36394	2.60409	2.51698	2.58573	2.50437	2.95131	2.69629	2.86818	2.67939	2.69436	2.74028	2.72943	2.5294	2.63951	2.35843	2.87998	3.28589	2.80265	2.61908	2.55563	2.6097	2.46605	2.62087	0.0217816	2.68749	0.274953	0.785175	0.876105	-6.32388
ATG4A	3.33929	3.21565	3.53617	3.5015	3.31929	3.45343	3.24834	2.98747	3.18809	3.15983	3.06588	3.17217	3.15202	3.38568	3.35419	3.10829	3.43859	3.44747	3.33481	3.40647	3.3233	3.49931	3.38518	3.35158	3.42499	3.18175	3.46693	3.27231	3.20631	-0.0862571	3.3078	-1.40417	0.1702	0.349962	-5.40482
ATG4B	3.31886	2.97123	3.13434	3.08684	3.29246	3.18307	3.07423	3.79589	3.67977	3.81072	3.58202	3.4603	2.48339	2.60837	2.69821	2.51482	2.53667	3.23467	3.21291	3.35338	3.32713	3.01822	2.67311	2.78107	3.32099	3.00912	3.19911	3.1713	3.59091	-0.026413	3.14218	-0.189505	0.850931	0.918837	-6.34373
ATG5	2.10319	2.21241	2.15734	2.16034	2.02983	2.08358	2.06588	2.47588	2.23019	2.1818	2.2926	2.55635	2.29489	2.07488	1.8088	1.92511	1.89822	2.20525	2.12741	2.13526	2.12858	2.13526	2.23316	2.12	2.47653	2.34319	2.50941	2.43078	2.45652	-0.125037	2.20181	-1.71213	0.0968502	0.246231	-4.96017
ATG9A	3.01026	2.947	2.94001	3.10686	2.95757	2.78533	3.27918	2.00307	2.25794	2.50309	2.18247	2.60464	2.87921	3.2985	2.93491	2.79485	3.15926	2.92595	3.02291	3.18866	3.15759	3.12094	3.44642	3.07423	3.07394	3.10376	3.48601	3.61575	3.39922	-0.415352	2.97447	-3.49376	0.00145588	0.0171467	-1.23206
ATIC	2.52083	2.59933	2.61556	2.33352	2.75761	2.91002	2.91664	2.7602	2.47007	2.49223	2.4086	2.92718	2.62389	2.80396	2.6844	2.47253	2.09504	2.6844	2.80018	2.83647	2.68951	2.66269	2.7447	2.89927	2.62057	2.66742	3.29009	2.74225	3.0469	-0.195766	2.69228	-2.33616	0.0261175	0.105496	-3.84904
ATM	2.05555	1.76998	2.29986	2.2203	1.73236	2.43922	2.21406	2.9369	2.93738	2.62421	2.79404	2.55365	2.55938	1.90446	2.52202	2.11038	2.01963	2.07365	2.39467	2.21564	2.20478	2.07562	1.8497	2.52202	1.88186	1.693	2.19635	2.01178	2.2594	0.220033	2.24386	1.81726	0.0788456	0.216925	-4.79172
ATMIN	2.58713	2.64589	2.61405	2.6611	2.6668	2.65619	2.56365	2.92485	2.59369	2.73332	2.7969	2.96911	2.03663	2.40553	2.1396	2.23064	2.25095	2.4579	2.42696	2.42661	2.49684	2.58268	2.34249	2.9561	2.55966	2.8311	2.78785	2.87492	2.79716	-0.070942	2.58677	-0.761791	0.451936	0.637631	-6.07371
ATP10D	2.9702	3.21605	2.94858	3.17183	3.5534	3.11544	2.92693	3.28823	3.83228	3.91996	3.48601	2.35715	3.22081	3.41643	3.47159	3.86917	3.23957	2.4031	2.25893	2.74252	2.7699	1.61971	2.30462	2.90337	1.65145	1.78848	2.18903	2.57685	1.81365	1.04253	2.86294	6.88692	1.01e-07	7.74e-05	7.79492
ATP11A	1.70858	1.42176	1.43616	1.52071	1.18753	1.55643	1.33432	1.3162	1.43957	1.38753	1.45021	2.22703	1.20343	1.79831	1.55958	1.47615	1.46053	1.47261	1.5662	1.6589	1.18753	1.46924	1.92674	2.24148	2.60659	2.53382	1.71637	2.24001	2.2766	-0.408948	1.66828	-3.18187	0.00331509	0.0290164	-1.9914
ATP11B	2.53315	2.75664	2.43775	2.1292	2.15913	2.25422	2.32934	2.32748	2.22753	2.64589	2.22799	1.90446	2.83136	2.59108	2.64589	2.50238	2.43565	1.63109	2.04574	2.18862	1.93237	2.1852	2.27953	3.08156	2.12259	1.6425	2.1635	2.14068	2.33769	0.262262	2.29966	2.32304	0.0269037	0.107084	-3.87499
ATP13A3	3.93912	2.92561	3.09505	3.02031	3.41467	2.94909	3.15023	2.76262	2.14469	2.5863	3.49328	2.38065	2.99561	2.58856	2.2865	3.13712	3.25549	2.4853	2.29127	2.47197	2.56115	2.60602	2.957	2.55232	2.69436	3.5316	2.92168	3.68157	2.59369	0.169527	2.87837	1.04683	0.303262	0.502349	-5.82239
ATP1A1	3.42315	3.48428	3.30377	3.4827	3.83114	3.4837	3.53715	3.5015	3.73744	3.21088	3.06114	3.2532	2.62869	3.11878	3.47764	3.73141	2.9561	3.74899	3.4684	3.77562	3.33445	3.57791	3.08456	3.08795	4.14249	4.1869	3.27112	4.33568	2.93261	-0.212849	3.45412	-1.53411	0.135135	0.302626	-5.22634
ATP1A2	4.07084	3.86379	3.69559	3.3444	3.08514	3.45397	3.69829	2.03726	3.4284	3.2458	3.73141	3.55029	3.33167	3.61785	3.87322	3.3996	3.42008	3.44469	2.25997	3.86917	4.28371	4.04274	3.2003	3.753	2.73922	2.65221	4.28371	3.30188	5.17148	-0.121881	3.51206	-0.545959	0.588998	0.741414	-6.2131
ATP1B1	4.06692	4.12238	4.41671	3.88818	3.86776	4.05391	3.80141	3.6241	3.19634	3.52402	4.10868	4.092	3.40517	4.06692	3.49483	4.06503	3.78212	4.18938	3.92164	4.27545	4.10258	4.13602	3.94494	3.75889	4.14031	4.28937	3.47764	4.06306	4.02411	-0.16951	3.92758	-1.58239	0.1237	0.285699	-5.15658
ATP1B2	2.12741	2.09204	2.24666	2.49809	2.09504	2.48923	2.41524	2.29212	2.22876	2.07635	1.76101	3.18536	2.37765	2.19774	2.73417	3.16537	2.57247	2.27557	2.48827	2.56857	2.30504	2.59017	2.4827	2.9614	2.11369	1.53101	3.09357	2.15365	2.55763	-0.0412025	2.40262	-0.291576	0.772551	0.867529	-6.31917
ATP1B3	2.69964	2.5498	2.91732	2.86096	3.11908	2.93517	3.06055	3.13776	3.67615	2.77049	3.12595	2.28247	2.21721	2.22516	2.12567	2.38912	2.19774	3.26237	3.3835	3.06248	3.277	3.54285	3.23957	1.62157	4.59827	5.02671	3.00691	4.42148	2.68637	-0.704466	3.01446	-2.93998	0.00615053	0.041976	-2.55614
ATP2A2	4.68458	4.28371	4.82954	4.81824	4.58054	4.88255	4.92512	3.81298	3.75698	4.08328	3.32749	4.81824	3.8252	4.16074	3.83228	3.57791	3.97372	4.82954	5.02671	4.80845	5.04478	4.8958	4.64457	4.84176	5.04478	5.09226	5.56279	5.11991	5.26827	-0.769492	4.56389	-4.9442	2.51e-05	0.00175625	2.57841
ATP2B1	2.21721	1.99689	1.93423	1.85882	2.1372	1.74526	1.83511	2.58439	2.66212	2.47197	1.83269	2.64032	1.84015	1.92511	1.67353	1.97058	1.9844	1.86389	1.74526	1.90316	1.93423	1.88081	1.89224	2.36032	1.9932	2.34849	2.06151	1.83789	2.14928	0.0795347	2.04415	0.75962	0.453214	0.638938	-6.07533
ATP5F1A	4.94338	4.98887	5.30508	4.98887	4.97369	5.11991	5.06886	4.61256	4.50264	4.59827	4.47207	5.23293	4.11091	4.76685	4.74539	4.66736	4.55864	4.98887	5.04478	5.02671	5.26827	5.17148	4.8958	4.81824	4.49691	4.49691	4.62019	4.72833	4.84176	-0.0632114	4.82947	-0.584299	0.563243	0.723185	-6.19162
ATP5F1C	3.98671	3.8095	4.04675	4.06888	3.7456	4.04274	3.97175	3.14399	2.91535	3.36799	3.41467	4.21664	3.11051	3.99836	3.55918	3.38618	3.72519	4.06306	4.06306	4.11091	3.97372	3.87872	3.83114	3.93912	3.9654	4.1587	3.87037	4.30958	4.68458	-0.393639	3.83994	-3.15645	0.00354071	0.0302285	-2.05181
ATP5IF1	3.49483	3.84792	3.40111	3.73052	3.91996	3.75206	3.018	3.41687	3.19032	3.04885	3.46434	3.82899	3.26712	3.52895	3.57169	3.58356	3.29155	3.47962	3.30256	2.89378	3.58865	3.2117	3.36156	3.44803	3.00747	3.21859	3.23177	2.90713	3.41368	0.236188	3.39383	2.44234	0.020485	0.0901168	-3.63549
ATP5MC3	4.2437	4.25785	4.22906	4.21224	4.20113	4.1705	3.98965	3.86379	3.64449	3.44134	3.82783	4.64457	3.45974	4.00505	3.93324	3.83228	3.9588	4.33568	4.32259	4.31593	4.29577	4.30665	4.21462	3.95427	4.13102	4.38278	3.92767	4.25237	4.18185	-0.223419	4.08746	-2.2966	0.0285522	0.111131	-3.92693
ATP5MG	3.99185	4.22627	4.12491	4.14704	4.37215	4.20751	4.13102	3.93202	3.6143	3.6143	3.89977	4.12491	3.68502	4.01364	4.00661	3.86379	4.21224	4.12007	4.13102	4.19908	4.11812	4.00982	3.84911	3.71812	3.95072	4.10004	3.76295	3.9588	4.08171	0.00988251	4.00576	0.125831	0.900678	0.946653	-6.35378
ATP5PB	4.30665	4.31263	4.34946	4.35968	4.22627	4.45928	4.19649	3.96332	4.13602	3.75206	4.00183	4.79923	3.55975	4.00982	3.74807	3.94779	3.91275	4.36831	4.21224	4.39571	4.55257	4.46299	4.0191	4.24022	4.21224	4.22356	4.12916	4.28113	4.34946	-0.16716	4.18924	-1.73328	0.0929733	0.240551	-4.92694
ATP5PF	4.45928	4.76685	4.72061	4.48118	4.573	4.67629	4.39225	3.92495	3.79033	3.72784	3.90761	4.53306	4.09415	4.573	4.46711	4.23223	4.52242	4.67629	4.58054	4.81824	4.8549	4.8549	4.46711	4.56512	4.42678	4.46711	4.59194	4.573	4.51691	-0.272413	4.45638	-2.63067	0.0131485	0.0670083	-3.24147
ATP6AP2	2.92786	3.23957	3.33481	3.3794	3.72613	3.2089	3.17615	3.9167	3.52216	3.74263	3.95729	3.24725	2.88849	2.83007	2.91025	2.96773	3.20352	3.15369	3.01471	2.957	3.29391	2.91359	2.77558	2.43292	2.86526	3.15057	2.71592	3.22267	2.95232	0.350628	3.15955	2.98011	0.00555866	0.0394166	-2.46407
ATP6V0A1	3.30736	2.71898	2.86973	3.02477	3.20258	2.9121	2.97512	2.85518	2.87315	2.73395	2.60359	2.48863	3.15119	3.05259	2.65371	3.43028	3.16018	2.94483	3.15057	2.98608	3.02429	2.70278	3.33041	3.07343	3.14897	3.1057	3.29629	2.67346	2.29489	-0.0356973	2.95672	-0.346273	0.731475	0.8394	-6.30175
ATP6V0C	3.96063	3.69388	3.87872	4.00183	3.7499	3.96884	4.12491	3.98303	3.52532	3.90258	3.61785	3.48015	3.61988	3.72784	3.56031	3.72613	3.85315	4.19377	4.08808	4.10258	4.03498	4.07727	3.79589	3.416	3.83748	4.14704	4.25237	3.96332	3.77798	-0.187135	3.8642	-2.27158	0.0301962	0.114109	-3.97571
ATP6V0E1	3.37305	3.32366	3.64726	3.51926	3.62328	3.62913	3.37589	3.30299	3.35198	3.31231	3.33762	3.36915	3.41368	3.38027	3.11023	3.30411	3.28894	3.63078	3.44215	3.58356	3.81923	3.58662	3.53715	2.99322	3.57169	3.3954	3.78469	3.60121	3.53569	-0.148187	3.45325	-2.0837	0.0455142	0.149511	-4.3297
ATP6V1A	3.2707	3.27981	3.51995	3.50209	3.63498	3.59162	3.33641	3.66023	3.16468	3.25361	3.25773	4.03498	2.64754	3.14026	2.95449	3.30773	3.01471	3.80494	3.68255	3.65574	3.43076	3.48493	3.3954	1.99689	3.77351	3.72975	3.73332	3.79589	4.28113	-0.235997	3.42539	-1.5316	0.135754	0.303185	-5.22992
ATP6V1B2	3.53569	3.71379	3.49483	3.42788	3.3572	3.24089	3.28967	3.3996	3.26775	3.19634	3.47853	2.97072	3.80038	3.61065	3.65661	3.57218	3.22081	3.43672	3.34084	3.1846	3.48015	3.45452	3.54728	3.27954	3.06139	3.02801	3.20091	2.83701	2.99797	0.18809	3.34767	2.20174	0.035246	0.125619	-4.10989
ATP6V1D	3.59763	3.36336	3.62819	3.80374	3.68404	3.78922	3.49328	3.26775	3.42357	3.39623	3.9937	3.93202	2.75761	3.27918	3.10079	3.30584	3.23609	3.51341	3.29705	3.55918	3.49689	3.82053	3.48015	3.21748	4.02947	3.39232	3.26083	3.52402	3.69311	-0.0500421	3.49437	-0.465391	0.644901	0.782066	-6.25358
ATP6V1E1	3.83013	3.84328	3.85717	3.96884	4.02259	4.19908	4.05739	3.12977	3.29391	3.54783	3.63295	3.65193	3.7322	4.20489	3.98671	3.83013	3.78002	3.7948	3.54783	4.11555	3.85185	3.93202	4.32259	3.75698	3.28931	3.85185	3.68594	3.4837	3.81183	0.0111445	3.79355	0.104736	0.917259	0.954909	-6.35622
ATP6V1F	3.69218	3.40161	3.47906	3.54783	3.52279	3.54896	3.46434	3.15675	2.87422	2.91583	2.86396	3.06025	3.65501	3.71718	3.30847	3.80245	3.52643	3.79589	3.64315	3.62819	3.54491	3.56985	4.00017	3.53962	3.0305	3.7652	3.59981	3.91008	3.03282	-0.2038	3.46888	-1.81319	0.0794866	0.217919	-4.79841
ATP6V1G1	3.66412	3.35045	3.42146	3.7088	3.77798	3.85455	3.49791	3.34906	3.36492	3.32499	3.37633	3.30337	3.27304	3.57408	3.26237	3.44642	3.55918	3.51607	3.2117	3.53838	3.67884	3.48746	3.43634	3.20091	3.60934	3.45038	3.54547	3.35599	3.39875	0.0245321	3.46685	0.349587	0.72901	0.838139	-6.3006
ATP6V1H	3.37847	3.15398	3.31705	2.9754	3.42146	3.18284	3.37112	3.30999	3.2003	3.47962	3.47303	3.64077	2.72684	3.18338	2.74897	2.72143	2.66975	3.12354	3.11	3.21291	3.22081	3.44907	3.04333	3.3097	3.30896	2.87921	3.32206	2.95722	3.51607	-0.0306199	3.18646	-0.307179	0.760759	0.858708	-6.31451
ATP7A	1.98934	2.15913	1.92238	2.06588	2.46751	1.90446	2.03506	2.53382	2.47715	2.47465	2.76962	2.11164	1.85386	2.07778	2.1058	2.09335	1.79319	1.71781	2.11164	2.12	1.89147	2.03046	1.70532	2.33137	2.18346	2.22649	2.4231	2.1759	2.18346	0.0750348	2.13569	0.769805	0.447236	0.634108	-6.06768
ATP7B	2.95757	2.91821	2.54295	2.56422	2.53819	2.62141	2.38804	2.34968	2.51445	2.49084	2.52904	2.84815	2.67579	3.17479	4.00183	3.14481	3.08965	2.49512	2.49646	2.55665	2.47901	2.53071	2.30961	2.74579	2.2312	2.28157	2.242	2.01432	2.56055	0.373355	2.63078	2.98042	0.00555438	0.0394166	-2.46337
ATP8A1	2.8362	2.69607	3.1926	3.01619	3.26881	2.85151	3.16975	3.69559	3.07733	3.17418	3.33445	3.19634	3.21438	2.68923	2.92718	3.14272	2.80344	2.89115	3.46136	2.84913	2.85248	2.76671	2.51636	3.07233	2.89378	2.34928	2.95282	2.51724	3.02089	0.230352	2.98033	2.23857	0.0324957	0.119166	-4.03951
ATP8B1	2.46788	2.41373	1.7873	1.99689	2.13112	2.1635	2.41599	2.13404	2.80889	2.39029	2.49425	2.62389	2.00729	1.84872	1.38329	2.23908	2.03566	1.86962	2.38988	2.0462	2.38483	2.06455	2.82009	1.93516	2.50111	3.02933	1.78331	2.59774	2.51823	-0.131762	2.2511	-0.984415	0.332525	0.53122	-5.88381
ATP9A	3.09357	3.25082	2.95394	3.20701	3.45196	2.89927	3.39141	2.77719	3.08008	3.24027	3.0838	2.80794	2.50467	2.9022	2.37526	2.63283	3.71186	3.07903	2.65706	2.61434	2.68333	2.83871	2.89854	2.53193	3.17045	2.69741	3.4469	2.79453	3.59504	0.104144	2.97832	0.823726	0.416382	0.605636	-6.02552
ATP9B	2.29312	2.30607	2.25095	2.27218	2.40751	2.31146	2.42274	2.27358	2.6245	2.19598	2.12801	2.00805	2.65013	2.60309	2.58411	2.30839	2.43922	2.3289	2.03046	2.48129	2.1656	2.32549	2.38447	2.51636	2.09945	2.73185	2.71162	2.34442	2.17726	-0.000505762	2.3578	-0.00636751	0.99496	0.996788	-6.36169
ATR	1.72085	2.71875	2.68358	2.36929	3.04187	2.43803	1.92773	2.86345	2.75712	2.49613	2.85355	2.09504	2.51544	2.30288	2.57685	2.69652	2.65619	2.31194	2.57808	2.24625	2.54811	2.35223	2.41753	2.61734	2.45998	2.25422	2.49084	2.14636	2.36805	0.113303	2.46566	1.06685	0.29427	0.493284	-5.80195
ATRAID	3.49988	3.6226	3.88818	3.74647	3.79033	3.67884	3.74263	3.40212	3.48108	3.04485	2.83796	3.81701	3.83381	4.25785	3.22471	3.73417	3.55736	3.6505	3.71718	3.67372	3.69135	3.65954	3.8352	4.0118	2.89495	3.42685	3.48064	3.28711	3.7511	0.00764386	3.59448	0.0647722	0.948771	0.971553	-6.35961
ATRN	2.85464	2.7047	2.83088	2.80945	2.54779	2.5997	2.92223	2.65935	2.4978	2.65456	2.39425	2.75578	2.91557	2.95722	2.74807	2.73363	3.25281	2.88261	2.82975	2.93544	2.98695	2.89137	3.00747	3.21207	2.44617	3.0664	2.63533	2.85985	2.71032	-0.116775	2.80352	-1.45439	0.155878	0.33248	-5.33746
ATRX	2.5498	2.77639	2.7445	2.83591	2.78135	2.77639	2.58713	2.834	2.9909	3.01688	2.98012	3.23244	2.85952	2.17783	2.48038	2.54232	2.43497	2.86201	2.59219	2.71054	2.74897	2.71953	2.3865	2.93663	2.64779	2.98228	2.75129	2.63584	2.76501	0.0130101	2.73584	0.150282	0.881514	0.93483	-6.3504
ATXN1	2.80694	2.77294	2.3877	2.06673	2.63764	2.46854	2.45053	2.84372	2.64838	2.89224	2.557	2.51164	2.52662	2.45053	2.77398	2.85684	2.80449	2.54584	2.23171	2.55852	2.84372	3.03554	2.37317	2.68101	2.79763	2.40384	2.75396	2.2203	2.53885	0.0330788	2.6014	0.368372	0.715097	0.828282	-6.29387
ATXN10	3.30666	3.37684	3.36117	3.24214	3.17693	3.35765	3.30076	3.34608	3.31672	3.35374	3.44803	3.5051	2.98228	3.02169	3.13552	2.95817	2.98338	3.18284	2.99941	3.03682	3.42644	3.24935	2.82947	3.37724	2.95131	3.09636	3.22587	2.99141	3.19702	0.115169	3.19781	1.60327	0.119007	0.280081	-5.12586
ATXN2	2.88902	2.90951	3.00912	3.09844	2.7686	3.10803	3.09954	2.72279	3.30896	2.84216	2.79716	2.76634	3.20258	2.91182	3.42499	2.52797	2.65291	2.65317	2.96887	2.79562	2.93544	2.85124	2.45015	2.39467	3.04661	3.16723	3.1332	2.95101	2.96517	0.0841606	2.9087	0.903353	0.373298	0.570834	-5.95828
ATXN3	1.06527	0.65695	0.502529	1.04408	0.710733	0.266263	0.58514	1.81718	1.73513	1.7742	1.85701	1.5038	1.61388	1.42176	1.60202	1.78221	1.71637	0.966551	1.07701	1.06527	1.10201	1.06527	1.40386	2.12567	1.29107	1.62722	1.46466	1.39513	1.50931	-0.0672893	1.30164	-0.399126	0.692534	0.814403	-6.2821
ATXN7	2.54128	2.46538	2.34551	2.52112	2.32639	2.50167	2.4149	2.65189	2.6331	2.83323	2.5226	2.61465	2.3559	2.31938	2.47107	1.99082	1.83601	2.22753	2.73922	2.43427	2.33403	2.49613	2.30757	2.27557	3.0661	2.76437	2.54889	2.95953	2.44484	-0.117784	2.48079	-1.21856	0.232194	0.423463	-5.63548
AUH	3.45452	3.52279	3.43268	3.35814	3.44315	3.51121	3.10658	3.08514	3.1773	2.8123	3.19634	3.97372	3.00073	3.27112	3.25965	3.22557	3.01359	3.3444	3.47011	3.22834	3.56095	3.19002	3.31737	3.55553	3.38994	3.38306	3.02259	3.25244	3.35122	-0.0538588	3.30726	-0.609835	0.546411	0.712307	-6.17652
AURKAIP1	3.3835	3.48746	3.32413	3.41562	3.53715	3.50933	3.49053	2.63555	2.33446	2.42792	2.65619	3.31772	3.26266	3.55553	3.77798	3.71073	3.83381	3.38184	3.54285	3.64884	3.38784	3.54085	3.78212	3.67446	3.10346	3.47011	3.42092	3.60322	3.60596	-0.239405	3.3732	-1.74032	0.0917128	0.238944	-4.91581
AUTS2	2.5294	2.79562	2.9663	2.88212	3.11	2.9702	2.78563	2.65518	3.08488	2.22876	2.82094	3.05691	2.61022	2.30078	2.85297	2.86774	2.3289	2.26937	2.52763	2.17726	2.68516	2.51517	2.64646	2.90276	2.63206	2.58439	3.12002	2.89066	2.32673	0.149209	2.69394	1.43915	0.160119	0.337606	-5.35812
AVIL	2.36559	2.23461	2.12986	2.3925	2.48795	2.39721	2.53413	2.63283	3.62819	2.7609	2.6624	1.99518	3.52161	2.18474	3.83114	3.3794	2.09812	2.33937	2.41166	2.37959	1.96756	1.94078	1.13994	2.16613	2.21721	1.56199	2.17091	2.56857	1.87736	0.599206	2.41301	3.26216	0.00268919	0.0250979	-1.79903
AVL9	2.57808	2.52083	2.35547	2.24666	2.48923	2.38447	2.35145	2.27396	2.48565	2.20757	2.3535	2.69061	1.753	2.22268	1.64419	2.04574	1.99011	1.94903	2.58411	2.24251	1.99778	2.09129	2.52417	2.45829	3.18579	2.75488	2.59245	2.76611	2.52083	-0.202081	2.35381	-1.73318	0.0929912	0.240551	-4.9271
AVPI1	3.1054	2.67311	2.99965	3.21788	2.80889	3.22436	3.04416	2.63006	2.73667	2.53546	2.05555	2.44648	3.08353	3.44579	3.39454	3.12927	3.51341	3.13872	3.13552	3.35045	3.10259	3.09691	3.30114	3.2202	2.97657	3.43551	3.49544	2.54425	2.91796	-0.19916	3.02619	-1.57451	0.125512	0.288297	-5.1681
AZI2	2.03893	1.79447	1.88543	1.87062	2.09812	1.78636	1.67686	2.05133	2.13289	2.35884	2.30335	2.30462	1.78107	1.96476	1.6681	1.59997	1.67012	1.86282	2.07488	1.7907	1.50666	1.64074	1.9567	2.32142	2.08291	2.30029	2.31098	1.84342	2.23728	-0.0537231	1.96257	-0.552962	0.584251	0.738226	-6.20928
AZIN1	3.66265	3.74647	3.28176	3.20283	2.89724	2.80344	3.11142	2.9022	3.17788	3.40731	3.32286	2.83942	2.63584	2.86653	3.15983	2.75761	3.05172	2.4366	2.59742	2.38297	2.9022	3.23609	3.39623	2.77639	2.40107	3.34973	3.37356	2.34756	2.82896	0.27174	2.99503	2.07425	0.0464409	0.151733	-4.34692
B3GALNT1	2.68165	2.74084	3.03655	1.612	2.65221	2.51946	2.7352	2.44689	1.82411	2.56955	2.39064	2.7095	2.96887	3.50889	3.09016	2.85518	3.0855	2.49646	3.11512	2.83136	2.60695	2.7753	2.82249	3.2238	2.19941	2.46572	2.65221	2.11164	2.65291	0.00940824	2.66829	0.0634635	0.949804	0.971789	-6.35969
B3GALT2	0.58514	2.37797	2.43012	1.75958	2.34928	2.09335	3.23244	3.03343	2.07037	2.4905	2.29127	3.89273	1.74248	2.31666	2.77185	2.30247	3.52969	3.7937	3.68594	3.48217	2.70627	2.80236	1.88647	2.98805	2.3448	2.32306	2.9121	2.52289	3.80618	-0.510224	2.63873	-2.02679	0.0513501	0.162798	-4.43245
B3GNT2	3.27189	2.99991	3.16199	3.13685	2.63336	3.01573	2.85869	2.97349	3.21243	2.91329	3.21565	2.78165	2.76349	2.711	3.13872	2.70221	2.87795	3.00346	2.67691	2.85225	2.99141	3.21055	2.84049	2.96991	2.95817	3.33286	2.74028	2.70391	3.17317	0.00839405	2.95937	0.103522	0.918215	0.955539	-6.35634
B3GNT4	2.79924	2.4086	2.38184	2.66742	2.50408	2.71265	2.74661	2.30462	3.40111	3.16441	2.1396	2.10776	2.66464	2.99721	2.91359	2.86034	2.88569	2.77824	2.72917	3.02744	2.63869	2.59476	2.82587	2.26992	3.1182	2.39317	2.75465	2.94728	2.11478	0.00316566	2.68454	0.0258821	0.979517	0.987485	-6.36137
B4GALT1	2.7959	2.57307	2.71827	2.62219	2.32222	2.4664	2.4562	2.90977	2.49613	2.78741	2.50016	2.32592	2.53071	2.86008	3.06306	2.92198	2.4373	2.48597	2.88902	2.75876	2.70221	2.91664	2.59369	2.59332	3.6526	3.21207	2.04906	2.58378	2.04512	-0.0723367	2.66445	-0.589365	0.559883	0.720606	-6.18867
B4GALT2	2.84962	3.05669	2.97512	3.06055	2.84372	3.05338	3.30847	2.84324	2.87541	2.86678	3.04544	3.11607	3.04104	2.81602	2.53071	3.04602	3.16051	3.15023	2.86818	3.01949	2.92616	2.98386	3.10856	2.70193	3.11908	3.21716	3.10443	2.93891	2.65764	-0.0130393	2.97533	-0.180739	0.857748	0.922726	-6.34535
B4GALT3	2.62869	2.75514	3.02887	2.77719	2.70792	2.9037	2.84558	2.69706	2.70415	2.41956	2.29489	2.39872	2.72832	3.03151	2.9416	2.95874	2.64219	2.88316	2.92641	2.92485	2.90734	2.69464	2.94001	2.89351	3.34973	2.67195	2.99427	2.96911	3.00996	-0.197246	2.81479	-2.49968	0.0179276	0.0827064	-3.51752
B4GALT5	2.87541	3.02142	2.96658	2.83088	2.98262	2.86796	2.96991	2.73417	3.00622	2.34599	3.10376	2.75396	2.84427	2.51129	2.852	3.63582	2.90621	3.23276	3.43323	2.87889	3.30256	3.32555	2.8882	2.63819	3.57731	3.1549	3.44579	3.6497	2.75264	-0.295362	3.01683	-2.67939	0.0116947	0.0620341	-3.13654
B4GALT7	2.63848	2.66802	2.62504	2.72832	2.70193	2.58439	2.79738	2.67222	2.50376	2.888	2.44234	2.74897	2.61345	2.75904	2.72786	2.66768	2.5135	2.78337	2.6409	2.83236	2.69012	2.73077	3.10686	2.71534	2.39353	2.95477	2.91898	2.77073	2.6	-0.0979261	2.70407	-1.54295	0.132981	0.299396	-5.21371
B4GAT1	3.11142	3.19851	3.34608	2.83323	3.03889	2.86749	3.59763	3.13404	2.68165	3.08684	2.90898	3.30847	2.81898	3.23244	2.99828	2.90951	3.44416	3.22947	2.97775	3.21243	3.37068	3.16331	2.96245	3.46326	3.21396	2.42558	3.52716	2.56758	3.73928	-0.065198	3.11619	-0.570806	0.572242	0.73046	-6.19934
BABAM1	3.48893	3.56909	3.41508	3.53962	3.81298	3.58542	3.77142	3.26743	2.74522	3.05513	2.80794	3.14957	4.07727	3.97041	4.01759	4.03102	3.61509	3.49988	3.5179	3.71379	3.74738	3.6526	3.90258	3.96063	2.86873	3.14424	3.59091	3.1662	3.39581	0.0112709	3.51999	0.0813795	0.935663	0.964033	-6.35839
BABAM2	3.60195	3.2612	3.60386	3.47535	3.13404	3.53962	3.4973	3.08456	2.84244	2.93234	3.01026	3.23426	3.41562	3.8352	3.45768	3.64315	3.65339	3.30808	3.32136	3.4182	3.29482	3.37847	3.38994	3.83114	2.73022	3.32555	3.33929	2.94909	3.05469	0.0876093	3.32976	0.829822	0.412978	0.603421	-6.02058
BACE1	2.64385	2.7699	2.87209	3.0584	3.15825	2.86443	2.87795	2.75318	3.09449	3.0469	3.1527	3.06499	2.74058	2.73873	2.92361	2.70792	2.68863	2.87293	2.98122	3.04576	2.57429	2.56023	2.73945	2.63739	2.55011	2.61525	2.99456	2.95641	2.96686	0.10036	2.85004	1.34814	0.187374	0.369931	-5.47751
BACE2	2.41627	2.56924	2.50665	3.00691	3.43727	2.44451	2.78685	3.20385	3.09257	3.05972	3.05412	2.60309	2.72917	2.54263	2.41561	2.95722	2.70278	2.58914	2.66648	2.59742	3.0587	2.84707	3.0083	2.3101	3.3448	3.00489	2.56513	2.42344	2.0652	0.08907	2.75893	0.728058	0.472037	0.654579	-6.09844
BACH2	2.33446	2.26847	2.41712	2.6442	2.46926	2.16854	2.19374	2.17191	3.01919	2.85097	2.90276	2.60906	2.57363	2.61969	2.64284	2.60487	2.01527	1.82544	1.84134	2.08156	1.86282	1.84228	1.9715	2.82947	2.66133	1.61011	1.91231	1.53946	1.59997	0.535553	2.27874	4.33699	0.000141796	0.00450579	0.946001
BAG1	3.44907	3.45714	3.12809	3.23005	3.03503	3.19561	3.09416	2.30078	2.81389	2.43885	2.62778	3.21891	2.77294	3.23177	2.58244	2.76891	2.89854	3.32499	3.26369	3.36042	3.30999	3.73744	3.35847	3.57896	3.67798	3.74381	3.87172	3.93324	3.71186	-0.617187	3.21091	-5.45761	5.76e-06	0.00073091	3.97186
BAG2	3.17954	3.18636	3.1784	3.02909	3.16537	2.65544	2.89038	2.557	2.66358	2.82117	2.97293	2.76349	2.5997	2.92512	2.35759	2.24992	3.00545	2.53193	2.8067	2.9898	2.85175	3.59694	3.32555	2.55176	3.48846	3.35639	3.02657	3.29155	3.76926	-0.296898	2.95818	-2.37315	0.0240127	0.0999526	-3.77538
BAG6	4.07517	3.86246	3.76926	3.76295	3.65574	4.0329	4.10258	3.397	2.91359	3.05536	3.26266	3.44215	3.69388	4.04675	3.84453	4.14474	3.87477	3.83013	3.92495	3.78808	3.8352	3.97041	4.25785	3.84663	3.62112	3.85996	3.63371	3.84107	3.78319	-0.14721	3.76306	-1.29885	0.203563	0.391647	-5.53928
BAHD1	2.91638	3.01521	2.83061	2.96115	2.86065	2.67639	2.75964	2.72227	2.68462	2.78913	2.46538	2.37603	2.74494	2.91796	2.72751	2.7447	2.90563	2.84787	2.8243	2.92595	2.83136	3.0361	2.92408	2.82144	3.33481	3.0511	2.98888	3.09141	2.89038	-0.193491	2.85055	-2.8699	0.00732919	0.0466698	-2.71526
BAMBI	3.17045	2.85272	2.7907	3.18608	2.62778	2.84731	3.26999	2.9499	3.32099	2.63283	3.11051	2.36311	2.73718	2.56449	2.92223	2.87047	2.89168	1.84342	2.23614	2.67283	2.40708	2.58411	2.44088	2.05133	2.39029	3.57661	3.24834	2.14686	2.37526	0.390969	2.72695	2.87637	0.00721209	0.0463377	-2.70066
BAZ1A	1.77163	1.69493	1.8291	1.8088	1.86655	1.84015	1.67499	2.80396	1.9884	1.94348	2.31194	1.3101	2.09812	1.79447	2.14169	2.41166	1.63722	1.92424	2.05952	1.76101	1.78937	1.7907	2.212	1.75125	2.56575	2.3887	1.49805	2.7961	1.73236	-0.0855271	1.97228	-0.641701	0.525779	0.695336	-6.15679
BAZ1B	2.85628	3.15559	3.04721	3.23849	3.33236	3.24544	2.95101	2.85097	2.89115	2.85769	2.72658	2.84835	3.40567	3.28408	3.21716	3.28782	3.66776	3.07394	3.01919	2.97572	3.06025	2.70365	2.95101	2.97657	2.87541	2.51911	2.88878	2.7434	3.13135	0.19976	3.02697	2.26548	0.0306098	0.115193	-3.98755
BAZ2B	2.61969	2.58268	2.69039	2.75928	3.14897	2.63951	2.69464	2.61056	3.05669	2.63006	2.85869	2.57429	2.81952	2.63283	2.83701	2.64057	2.81202	2.37441	2.71054	2.43497	2.37959	2.2321	2.08291	2.92693	2.34968	2.4889	2.51164	2.58152	2.73444	0.257643	2.635	3.30296	0.00241618	0.0235814	-1.7004
BBOF1	2.7321	2.24872	2.38297	2.71479	2.70448	2.81313	2.36032	2.49878	3.20155	2.67283	2.90248	2.71672	3.01657	3.14399	3.04075	3.62913	3.2192	2.71642	2.72249	2.75605	2.48988	2.45403	2.92718	3.33374	1.54965	1.69138	2.15913	2.22602	1.84134	0.417833	2.65055	2.63773	0.0129278	0.0662166	-3.22633
BBS1	3.0115	2.78337	3.03317	3.15467	2.99797	2.89251	2.97875	3.08133	3.11224	3.34811	3.21534	2.53917	3.45397	3.31588	3.49168	2.81389	3.1062	3.01382	2.96991	3.1176	3.23997	2.86526	2.91841	2.91297	2.28288	2.72489	2.70577	2.75761	2.88734	0.211852	2.99056	2.26074	0.030935	0.115858	-3.99675
BBS4	2.59444	2.50408	2.3975	2.60777	3.06306	2.6125	2.34802	2.78416	3.55273	2.64002	2.85384	2.86678	2.96298	2.86443	2.87642	3.01949	2.81735	2.78312	2.23412	2.57397	2.35145	2.55728	2.59774	2.70732	2.12508	1.9567	2.26047	1.84451	2.26654	0.431352	2.60772	3.96515	0.000401891	0.00804567	-0.0322305
BBS9	2.5097	2.05345	2.4579	2.57603	1.86203	2.96911	2.72917	2.49425	2.70577	2.37485	3.21055	2.61133	2.22876	1.93237	2.09204	2.63091	2.17035	3.09177	1.20343	3.39098	2.97572	1.69654	2.46706	3.10935	2.3101	2.5097	2.72227	3.09719	2.38065	-0.131999	2.50218	-0.744676	0.462071	0.646876	-6.08639
BBX	2.79429	2.59271	2.82558	2.54395	3.21367	2.80764	2.76262	2.93816	2.77049	3.05031	2.94132	2.52041	2.84505	2.73185	2.80018	2.75371	3.03503	2.74633	2.73043	2.74172	2.78003	2.58602	2.57247	2.97484	2.6326	2.14573	3.00912	2.3877	3.04001	0.123651	2.76807	1.46169	0.153879	0.329892	-5.3275
BCAM	3.6808	3.25507	3.37157	3.73526	3.24544	3.87322	3.8095	2.72704	2.54009	3.374	2.15982	3.36336	4.27545	3.74477	4.59827	3.78808	4.60506	3.72613	3.9671	3.69994	3.88513	3.58607	4.45466	3.4827	3.26197	3.04629	3.41189	3.16791	3.23609	-0.0391106	3.55423	-0.19238	0.848698	0.917394	-6.34318
BCAN	3.15983	2.7922	2.78885	2.99588	2.81171	2.98386	2.88543	3.38068	1.55958	1.76533	2.25422	3.16851	3.5179	3.25867	3.02909	3.10049	3.69046	3.20512	3.05469	3.1332	3.05536	3.02657	2.93942	2.98318	2.31896	2.42126	3.70708	2.68134	4.1587	-0.166328	2.95957	-0.858661	0.397112	0.590042	-5.99674
BCAP29	3.11607	2.54328	2.60543	2.57485	2.23373	2.43775	2.67222	2.1852	2.53917	2.46751	2.3975	2.65371	2.29398	2.48099	2.27436	2.38254	2.66742	2.47007	2.41753	2.61969	2.78186	2.83236	2.7013	2.54263	2.78999	3.58356	2.52797	3.40684	2.55011	-0.267146	2.61206	-2.47099	0.0191681	0.0867418	-3.57677
BCAP31	2.70071	2.91002	2.9465	2.78593	3.10079	2.80473	3.16723	3.05444	2.74725	3.03119	2.69464	2.56175	2.9526	2.90091	2.81313	2.98858	3.10481	2.82065	2.92485	3.22307	2.8399	3.16912	2.91497	2.46706	2.83061	3.1469	3.34608	3.00433	2.8238	-0.0613244	2.92333	-0.772208	0.445833	0.632695	-6.06586
BCAR3	2.27038	2.09749	2.69388	2.11421	2.12741	2.3958	2.42729	2.4437	1.81845	2.38912	2.28609	3.37771	2.52507	2.61854	2.64729	2.778	2.43359	2.42203	2.4667	2.59369	2.34666	2.26139	3.20184	2.09387	2.66437	2.36262	2.57146	1.6609	1.82172	0.0656147	2.41073	0.485712	0.630583	0.772192	-6.24397
BCAS2	2.99348	3.23884	3.17075	3.08488	3.29891	2.86705	2.93075	2.74607	3.07792	3.11023	3.43913	3.12564	2.7775	3.06907	2.66742	2.78999	3.01919	3.04941	2.96686	3.10773	3.19851	3.26712	3.11943	2.99772	3.41508	3.43913	2.84864	2.89281	2.87179	-0.0739219	3.05452	-0.909185	0.37026	0.567462	-5.95312
BCAS3	2.78186	2.48339	2.63206	2.74084	2.71186	2.63848	2.88969	2.42907	2.68516	2.54205	2.74225	2.9754	2.79404	2.8114	3.06967	2.96059	2.79453	2.76164	2.60543	2.76556	2.86549	2.80587	2.9422	3.09691	2.60515	2.38035	2.79716	2.16278	2.74691	0.0347321	2.73165	0.424389	0.67421	0.803424	-6.27174
BCAT2	3.13596	2.81602	3.02565	2.8149	2.8489	3.05388	3.26547	2.93942	2.2609	2.78835	2.52662	3.3954	2.64867	3.38618	3.0622	3.16468	3.07122	3.1054	3.01412	3.0123	3.17817	3.10912	3.36875	3.93459	2.90848	2.51308	2.89351	2.66712	2.96461	-0.102571	2.99564	-0.856346	0.398371	0.590946	-5.99869
BCCIP	2.42126	2.44195	2.14799	2.48099	2.23908	2.7397	2.49548	2.2774	2.40708	2.42696	2.9205	2.44299	2.42792	2.83923	2.29172	2.43044	2.59017	2.56481	2.75465	2.83891	2.08358	2.55883	2.50238	2.718	2.44265	2.49717	2.37797	2.45331	3.04819	-0.0982239	2.51246	-1.13252	0.266091	0.46317	-5.73238
BCHE	1.81365	1.43957	1.79968	2.02277	2.50529	1.97941	1.9884	2.35385	2.68663	1.42906	2.52362	3.09107	2.22516	0.11114	1.99923	1.60403	2.60695	2.70193	2.61674	3.05338	2.72546	2.07712	2.51282	2.98228	2.62189	1.66524	3.97991	2.40553	2.7352	-0.662565	2.28472	-2.96377	0.00579287	0.0402915	-2.50164
BCKDHB	2.45861	1.97759	2.53382	1.96835	2.06151	2.47933	2.86317	2.55203	2.17944	2.06085	2.19323	3.0664	2.46199	2.91821	2.50111	2.3677	2.86065	2.87128	2.94515	3.4986	2.66975	2.74309	2.62087	3.05809	2.72809	2.01019	2.67525	2.83871	3.27884	-0.386747	2.60145	-2.98422	0.00550124	0.0393499	-2.45462
BCL10	2.96086	2.65221	2.78264	2.81007	2.74494	2.94187	2.86008	3.45596	3.42989	3.43408	3.67615	3.45196	2.03218	2.45296	2.3373	2.18573	2.23412	2.91002	2.93456	2.66567	2.55792	2.72856	2.41058	2.70819	3.7948	2.97512	2.54263	3.02429	1.79447	0.0956864	2.80999	0.543078	0.590956	0.742594	-6.21466
BCL11A	2.95722	2.46027	2.81171	2.97875	2.71853	2.89883	2.85605	2.57076	2.61345	1.9102	2.19267	3.42407	2.54488	3.07495	2.6	2.88752	2.84301	2.8702	3.27489	3.28823	2.85151	3.03976	2.65706	3.27523	3.35241	2.94325	2.58679	2.99169	4.14905	-0.380621	2.88355	-2.77508	0.0092645	0.0538585	-2.92706
BCL11B	1.54451	1.54451	1.3162	1.58714	1.32983	1.61011	1.59178	3.58015	3.31737	3.17657	2.69436	2.42597	3.10803	1.73236	3.21605	2.886	1.74091	1.46053	1.61971	1.46924	1.43299	1.69493	1.18037	1.30374	1.23317	1.13994	1.18753	1.11454	1.27886	0.915969	1.87991	4.02637	0.000339001	0.0073356	0.127209
BCL2	3.44469	3.59289	2.91182	2.97817	2.82009	3.07681	2.42479	2.80764	3.24668	3.2238	3.80245	1.44669	2.73469	2.834	3.03479	3.30999	2.56207	2.3141	2.10118	2.3925	2.242	2.61734	2.65935	3.15178	2.51881	1.94991	2.74897	2.04296	3.31588	0.45144	2.7692	2.5642	0.0154029	0.074726	-3.38267
BCL2L1	3.20791	3.13712	2.60487	2.97961	2.99915	2.62189	2.7969	2.36608	2.41627	2.83347	2.38065	2.60721	2.76776	3.48704	2.85323	2.78337	2.64838	2.71504	2.61022	3.24189	2.8156	2.64924	3.34006	2.8863	2.89604	3.30518	2.51445	2.88159	2.93973	-0.106029	2.83746	-0.973564	0.337802	0.536254	-5.89413
BCL2L11	1.82672	1.8497	1.86282	1.76681	1.65355	1.79194	1.85386	2.70103	2.77697	2.89772	2.80921	2.55465	1.53101	1.6589	2.14636	2.39824	1.27886	1.75013	1.81489	1.82411	1.87273	1.8291	1.33876	2.14469	2.06085	1.6609	2.10448	1.70326	1.97384	0.240093	1.98056	1.59455	0.12095	0.282458	-5.13873
BCL2L13	3.09986	3.11571	3.53095	2.93382	3.05691	3.19296	3.07086	2.3677	3.01521	2.83728	2.9526	3.13526	2.85577	3.18139	3.14329	3.06356	3.02964	3.4312	2.97572	3.42545	3.25965	3.57541	3.21055	3.23928	3.32749	3.51061	3.37444	3.43672	3.13373	-0.290742	3.15459	-3.52654	0.00133328	0.0163013	-1.15047
BCL2L2	2.9465	3.13596	3.16233	2.87843	2.8114	3.10346	3.00945	2.81952	2.86902	2.86034	2.85518	2.66567	3.18704	3.29246	3.03711	3.10014	3.3097	3.16372	3.13404	3.06195	3.01471	2.7621	3.00945	2.73417	2.9205	2.90592	3.14424	2.64618	3.10346	0.0358679	2.98773	0.488079	0.628925	0.770991	-6.24282
BCL3	1.72667	1.8126	2.1645	1.59178	1.13994	1.97855	1.82788	1.37631	1.99689	1.69787	1.80763	1.09082	2.18903	2.54512	2.17191	3.01919	1.9207	2.40063	3.36042	1.58714	2.64754	3.5534	4.05919	1.3162	3.88093	3.45498	1.72956	3.34566	1.84015	-0.878922	2.24942	-3.4487	0.00164232	0.0183879	-1.34369
BCL6	2.90512	3.16299	3.43859	3.63582	3.42499	3.22629	3.84453	2.86396	3.36946	3.00121	2.87642	2.16695	3.54022	3.33641	3.3444	3.44416	3.0305	3.70977	3.97041	3.76019	3.91127	3.79915	3.9671	2.42126	4.81824	3.75698	3.87989	4.59194	3.25807	-0.607881	3.46401	-3.48476	0.00149139	0.0174145	-1.25439
BCL7A	2.99248	3.07903	2.9443	2.94594	2.58211	2.8149	2.8476	1.91808	2.04574	1.69654	2.42239	2.77371	2.63707	2.97349	2.76262	2.93015	3.12687	2.73922	2.81037	2.92743	2.42907	2.81708	3.61645	3.38184	3.43634	3.18013	2.79429	2.35998	3.05997	-0.286621	2.79466	-1.93349	0.0623437	0.186689	-4.59621
BCL7B	3.25965	3.29285	3.25549	3.11544	2.87998	3.33481	3.17217	3.06996	3.28024	3.28482	3.09533	3.53838	2.37441	2.8149	2.25893	2.28726	2.67346	3.48893	3.21501	3.45768	3.21814	3.45196	2.9864	3.20764	3.70426	3.59289	3.71812	3.97708	3.48217	-0.459057	3.18925	-3.59184	0.00111812	0.0150175	-0.987037
BCLAF1	2.57986	2.54425	2.60515	2.28157	2.21406	2.23373	2.33846	2.67148	2.52478	2.42274	2.78416	2.52607	2.15913	2.29442	2.3171	2.44484	2.44024	2.12445	2.14288	1.94991	2.2246	2.39134	2.19729	2.34551	2.61556	2.4283	1.99842	2.5365	2.31234	0.161979	2.36721	2.13846	0.0404596	0.138064	-4.22883
BCOR	1.99406	2.20578	1.87849	1.73118	1.72263	1.47945	1.90926	1.72543	2.23784	1.26611	1.753	1.29107	1.83511	1.93788	2.28857	2.40751	1.84015	1.65145	1.9233	1.72263	1.56403	1.95339	2.0587	1.9102	2.64057	3.11224	1.87736	2.57808	1.93334	-0.223959	1.94582	-1.59526	0.120789	0.282458	-5.13768
BCORL1	2.86602	2.63142	2.48597	2.80473	2.66052	2.7917	2.68771	2.26288	2.79738	2.43078	1.95181	2.36881	2.7621	2.57281	2.28431	2.85769	2.7352	2.69331	2.84275	2.93911	2.49257	2.65115	2.44057	2.8311	3.60195	2.94834	3.08008	3.14771	2.82975	-0.289464	2.70518	-2.74893	0.00987698	0.0561033	-2.98474
BCR	2.76409	2.53757	2.30247	2.40633	1.9862	2.28157	2.70415	2.28105	2.72889	2.53757	1.95339	2.48301	2.67066	2.54617	2.46127	2.39648	2.40191	2.86465	2.59835	2.88681	2.63707	2.73254	3.03343	2.86201	3.10376	2.57603	2.42874	2.90951	2.58035	-0.329959	2.57435	-3.81148	0.000614379	0.0109198	-0.429149
BCS1L	3.33445	3.23707	3.49689	3.39187	3.32099	3.38102	3.50825	3.2735	3.12002	3.30551	3.10443	3.63003	2.92485	3.2303	3.16018	3.02964	3.19364	3.14297	3.21716	3.43363	3.26712	3.56511	3.45714	3.48428	3.20601	2.92147	3.41687	3.01871	3.48947	-0.0285642	3.28492	-0.372147	0.712313	0.826258	-6.29248
BDH1	3.56568	2.29624	3.94185	3.49111	3.3	3.3954	3.55146	3.57938	3.28754	3.22915	2.92083	4.14905	3.16111	3.53781	3.12207	3.20091	3.39367	3.7641	3.72519	3.97708	3.74477	3.56308	3.27267	3.88654	3.28754	2.43391	3.2287	3.37847	4.50718	-0.203909	3.44457	-1.25472	0.218947	0.409577	-5.59283
BECN1	3.15082	3.45542	3.21788	3.01075	2.89326	3.07546	3.11669	2.76437	2.69172	2.55203	2.88462	2.77824	3.04275	3.24429	3.14272	3.24466	3.39141	3.17586	2.84427	3.18175	3.12955	3.38742	3.12868	3.42447	2.92786	3.2238	3.03374	3.16946	3.15759	-0.110051	3.08419	-1.28795	0.207284	0.394803	-5.55266
BEX3	3.8587	3.82434	4.06306	4.24965	4.09415	4.14031	4.07727	4.06503	3.94057	3.7088	3.68157	4.30958	3.75698	3.99524	3.56697	3.74899	3.87172	4.25237	3.96063	4.21462	4.32259	4.21462	3.82251	4.04866	3.9167	3.68787	4.58581	3.56829	3.78684	-0.0933849	3.97705	-0.982738	0.333337	0.532109	-5.88542
BFAR	3.14297	3.18809	3.15951	3.09177	3.21647	2.80044	3.11973	2.91329	2.99864	3.08912	2.71081	3.13596	3.04001	3.02291	3.13072	2.99169	2.89066	3.11512	2.8275	2.97398	3.25807	2.92963	2.97271	3.33407	3.44416	2.78165	2.80532	3.05536	2.88569	0.00587306	3.03538	0.0814434	0.935612	0.964033	-6.35839
BGN	3.47661	3.76019	3.43784	4.11812	4.37918	3.74048	3.76295	3.18363	3.87037	4.33568	4.07084	2.15094	5.26827	3.22587	4.48118	4.37551	4.19377	2.96658	2.98228	3.02323	3.65501	3.5145	3.95427	2.63667	2.43359	2.9369	2.64284	2.90248	2.43359	0.865607	3.51425	3.98181	0.000383732	0.00780779	0.0110734
BHLHE41	2.89431	3.20125	2.63764	2.97484	3.18809	2.7907	2.51881	2.23562	3.43784	2.60024	3.12717	3.00996	2.87074	2.77268	2.14424	3.2476	2.51236	2.4562	2.48417	2.46088	2.27557	2.22557	2.98386	2.57281	1.98934	1.85091	3.39454	2.97572	2.3559	0.331059	2.69619	2.31173	0.0275979	0.108501	-3.89725
BHMT2	2.63504	2.63114	2.93075	3.0469	2.79485	2.73945	2.73543	2.84019	2.99941	3.32136	2.95079	1.22521	2.86228	2.96189	2.98547	1.69493	3.05669	2.80714	3.06055	3.25773	2.94187	3.10595	3.05172	3.08042	2.65935	2.40633	4.4309	3.33331	3.06996	-0.370332	2.88335	-2.04286	0.0496386	0.158901	-4.40365
BICD2	2.85435	2.84529	2.9205	2.74633	2.75634	2.78416	2.98012	2.57186	2.41599	2.42414	2.86317	2.7013	2.48957	2.84477	2.64316	2.80839	2.84244	2.50768	2.43626	2.50631	2.88287	2.93816	2.82094	2.59933	2.99322	2.71479	2.93544	2.99514	3.05	-0.0468614	2.75421	-0.607268	0.548092	0.713474	-6.17806
BICRAL	2.11369	2.67222	2.23677	2.08504	2.43359	2.19635	2.24099	2.77824	2.7788	2.7434	2.57784	2.38562	2.36394	2.18001	2.05267	2.14799	2.3141	2.1292	2.18247	2.02481	2.16854	2.26506	1.9102	2.41712	2.06836	2.2558	2.38988	2.21406	2.61314	0.150775	2.30827	1.70189	0.0987753	0.249246	-4.97614
BIN3	2.7702	2.81984	2.4093	2.80559	2.86796	2.61405	2.85518	2.56232	2.53514	2.57186	2.40231	2.29935	2.80152	2.8626	2.96826	2.91732	2.68923	2.60487	2.69331	2.43391	2.54715	2.72704	2.88369	2.57574	3.34282	2.86526	2.52874	2.968	2.06151	0.00529395	2.68911	0.0546705	0.956751	0.974704	-6.36021
BIRC3	1.09082	1.25373	1.62722	1.34755	2.59271	1.11454	1.6425	3.00234	2.53852	2.26937	2.2774	1.60819	1.66524	1.38753	1.7907	1.50021	1.00386	1.59178	1.68771	2.1698	1.51266	1.54451	1.49805	1.04408	3.65193	3.51504	1.48925	2.8292	1.43299	-0.249459	1.85101	-0.98489	0.332296	0.53122	-5.88336
BLCAP	3.32713	3.61509	3.62913	3.51121	3.55675	3.5316	3.65501	3.07148	3.24027	3.33596	3.54966	3.79791	2.9898	3.6808	3.33929	3.11943	3.32713	3.56697	3.72008	3.51504	3.42685	3.47303	3.88227	3.23671	3.47853	3.57791	3.56233	3.04576	3.19634	-0.0453878	3.44688	-0.507813	0.615175	0.761079	-6.23306
BLNK	1.5662	1.82172	2.03893	1.87623	2.2563	1.89434	1.81365	4.0191	4.19649	3.30808	3.93324	3.36384	3.01718	1.63552	2.22268	3.77672	1.68949	2.11751	2.29087	2.10118	1.87849	1.84015	1.71932	2.11369	1.37954	1.04408	1.36459	1.1959	0.872996	0.953653	2.2189	3.37712	0.0019866	0.0207528	-1.51973
BLOC1S1	3.26042	3.03859	3.11734	3.3097	3.42357	3.12382	3.4469	2.90115	1.49805	2.33267	2.10056	2.30794	3.76295	4.14905	4.05058	4.06306	4.64457	3.29246	3.46227	3.56233	3.33407	3.27112	4.33271	3.32099	2.71672	3.10747	3.11081	2.90276	2.86749	-0.0657314	3.2349	-0.270403	0.78864	0.878002	-6.32512
BLVRA	3.51341	3.22834	3.46693	3.52349	3.6497	3.64726	3.69743	3.72228	3.14511	3.57218	3.33968	3.61645	3.12779	3.46904	3.21788	3.13347	3.38102	3.76295	3.64652	3.63078	3.36875	3.45397	3.4312	3.32413	3.31159	3.55608	3.23075	3.37896	3.71286	-0.0457229	3.45724	-0.588472	0.560475	0.721159	-6.18919
BLVRB	3.05338	2.98888	2.90391	3.28215	3.2735	3.32749	2.90276	3.40434	2.72062	3.02429	2.67939	3.39141	2.95953	3.30999	2.90492	2.91762	3.20567	3.41368	3.52762	3.61575	2.97875	3.1614	3.48156	3.09107	2.90464	3.27446	2.9898	3.05444	3.38742	-0.166528	3.14243	-1.83773	0.0756943	0.211239	-4.758
BLZF1	1.57846	1.78636	1.85701	1.44282	1.39912	1.34755	1.42176	1.94991	2.03967	2.04212	2.29087	2.09687	1.83789	1.70141	1.85386	1.7799	2.0188	1.58519	1.44282	1.52372	1.4153	1.67353	1.71328	2.26751	1.78107	1.67828	1.75013	1.57846	1.88951	0.0992799	1.74977	1.01306	0.318868	0.51906	-5.85607
BMERB1	3.44579	3.32461	3.4141	3.42545	3.50097	3.422	3.5067	2.7902	2.68385	3.0395	2.60543	3.07122	3.24507	3.32634	3.10014	3.32713	3.75206	2.94758	2.91002	3.08042	2.92028	3.11422	3.75414	2.75876	3.24056	3.1233	2.93298	3.59367	2.98318	0.120891	3.18413	1.06524	0.294985	0.493429	-5.80361
BMI1	3.01521	3.57472	3.44579	2.77342	3.19874	2.9898	2.75208	3.26197	3.34365	3.37847	3.49223	3.14897	2.64978	2.70627	2.63419	2.61615	2.97987	2.80694	3.04967	2.83088	2.85922	2.7969	2.60055	2.91732	2.87843	2.52629	3.22977	2.96	3.22176	0.166736	2.98755	1.55471	0.130155	0.295477	-5.1968
BMP2K	1.68161	1.90642	1.76681	1.7742	2.02277	1.82544	1.919	2.34599	2.1568	1.76101	1.72667	1.90642	2.11369	1.97759	2.04512	1.67012	1.93878	1.57846	2.12858	1.82172	1.85606	1.693	2.00892	2.44854	1.68771	2.02983	2.7065	2.30078	2.04837	-0.111678	1.96024	-1.14668	0.260279	0.456808	-5.71688
BMPR1A	3.11	3.59367	2.64219	2.63448	2.80587	2.62778	2.73043	2.37837	2.74309	2.51378	2.98199	3.15587	2.64474	2.53917	2.5916	2.67908	2.75318	2.77445	3.01252	2.9108	2.86124	3.01619	2.67837	3.07373	2.52325	3.33516	3.30217	3.52046	3.03918	-0.231884	2.86803	-2.13675	0.0406095	0.138489	-4.23201
BMPR2	2.57864	2.15628	2.2	2.21241	2.34599	1.98361	2.21721	2.321	2.30159	2.37235	2.62189	2.14928	1.71932	2.15628	2.06898	1.98934	2.30551	2.03125	1.81951	2.20325	2.2865	2.23506	2.16159	2.50167	2.84449	2.0497	2.24579	2.59476	2.68308	-0.087094	2.25367	-0.90378	0.373075	0.570813	-5.9579
BMS1	2.80044	2.99797	2.77073	2.75096	2.87467	2.7925	2.80018	2.83728	2.76324	2.62725	2.68798	2.63764	2.83478	2.85818	3.0757	2.7352	2.75664	2.54425	2.70391	2.69388	2.73667	2.74252	2.49809	3.04416	2.52729	3.04187	2.72399	2.88902	2.55599	0.0749408	2.76907	1.17057	0.250683	0.445849	-5.69033
BNIP1	2.24625	2.23959	2.277	2.26047	2.19836	1.9862	2.28203	2.00954	2.10003	1.78331	2.14288	2.4827	2.41851	2.60721	2.19836	2.63951	2.32021	2.24349	2.19635	2.2	1.95984	2.372	2.82636	2.38912	2.1869	2.27557	2.54395	1.94903	2.3837	-0.0472627	2.26615	-0.536965	0.595122	0.744828	-6.21793
BNIP2	2.65482	2.58792	2.46605	2.33313	2.67602	2.34083	2.56304	2.63033	2.52662	2.6559	2.79505	2.77774	2.22924	2.39721	2.13174	2.02024	2.45962	2.40708	2.28902	2.59108	2.54925	2.55996	2.52874	2.26422	2.83591	2.89634	2.58476	2.8032	2.78913	-0.106528	2.52911	-1.26169	0.216463	0.406745	-5.5845
BNIP3	3.53037	3.44747	4.04274	3.45542	3.19561	3.93459	3.78556	2.97247	3.04819	3.24725	3.68689	3.49483	3.45498	3.70331	3.51852	3.61355	3.95191	3.65857	3.51341	3.81923	3.45143	3.6143	3.45923	3.43968	3.59008	3.27654	3.17817	3.62673	3.46536	0.0266046	3.52332	0.270151	0.788833	0.878037	-6.32519
BNIP3L	3.28754	3.01471	3.13961	3.54966	3.42051	3.23108	3.422	3.30217	3.70079	3.48217	3.43408	2.87615	3.721	3.04851	3.36748	3.41229	3.36454	3.11422	3.24056	3.08795	2.94783	2.69388	2.60837	2.90007	2.87179	2.61993	3.09474	2.6624	2.86796	0.447189	3.15462	5.16425	1.34e-05	0.00119561	3.17528
BORA	2.32795	1.71932	2.15982	2.52566	2.29212	2.18862	2.21661	3.45542	2.82348	3.35288	3.07956	1.93788	2.42239	2.20159	2.69877	3.192	1.69493	2.53478	2.02342	2.43626	2.31497	1.77854	2.22753	1.75802	2.29087	2.70221	1.57846	2.17531	1.53101	0.374973	2.33243	2.16858	0.0378978	0.131796	-4.17253
BPGM	1.69493	2.10968	1.8905	1.6425	1.80763	1.74667	2.10118	1.78107	1.75802	1.7119	1.85288	2.1129	1.90446	2.26288	1.75555	1.89224	2.02891	1.99167	1.9862	2.15227	1.91113	2.17191	2.31545	2.01432	2.37441	2.3183	2.62473	2.43186	2.42792	-0.341159	2.02669	-4.32403	0.000147081	0.00450579	0.911562
BPHL	2.63707	2.42628	2.29748	2.16498	1.93237	2.49425	2.5109	2.1841	2.55883	2.42344	2.77719	2.70193	1.94348	2.36689	2.02024	1.92424	1.9884	2.22122	2.24148	2.22322	2.30839	2.24872	2.71722	2.76293	2.04684	2.29935	2.71565	2.77445	2.50309	-0.107053	2.35913	-1.03583	0.308287	0.508627	-5.83348
BPTF	2.87128	2.80639	2.67552	3.12175	3.05088	2.90869	2.94858	2.91182	3.08075	2.63819	2.6326	2.93491	3.17289	2.73849	3.15202	2.90763	3.12717	2.73742	2.87467	2.75488	2.74807	2.69039	2.38254	3.07546	2.44787	2.64385	2.84731	2.58035	3.12002	0.180425	2.84767	2.28715	0.0291636	0.111678	-3.9454
BRD1	2.7824	3.02657	2.89604	2.68411	2.84815	2.89115	3.0824	3.58662	3.63295	3.56154	3.43503	2.95025	3.15236	2.42239	2.76437	2.63903	2.66619	2.80867	2.95477	2.8232	3.09662	3.01359	2.13224	1.86282	3.16687	3.0824	2.7881	3.04187	2.77094	0.206093	2.91599	1.49152	0.145921	0.318537	-5.28634
BRD2	3.35198	3.25833	3.02429	3.50333	3.49689	3.46379	3.2651	3.47853	3.13815	3.21716	3.07343	2.85952	3.30584	3.20125	3.30483	3.49791	3.1527	3.33596	3.39825	3.06748	3.28408	3.19132	3.06356	2.71827	3.69637	3.40352	2.73043	3.54842	3.09227	0.0593527	3.24562	0.647684	0.521952	0.692274	-6.15298
BRD3	3.07903	3.40875	3.2202	3.42407	3.25432	3.23997	3.45143	2.97605	2.96381	3.23743	3.03221	3.12207	3.24248	3.20828	3.32827	3.78469	3.25393	2.89517	3.09662	2.77719	2.9435	2.92984	2.90248	3.0052	2.88652	2.98318	2.8232	2.84019	2.83821	0.338538	3.10856	4.92027	2.69e-05	0.00181258	2.51357
BRD4	3.36664	3.51061	3.1133	3.14146	2.97775	3.36988	3.33167	2.87843	3.02396	3.01382	3.12649	2.68923	3.04967	3.28711	3.24635	3.44315	3.2806	2.95722	3.23849	3.15301	3.07373	3.14272	3.11193	3.01871	3.38436	3.17183	2.74252	3.39187	3.03374	0.0493104	3.14725	0.615101	0.542973	0.709861	-6.17332
BRD7	2.52289	2.99651	2.7788	2.60249	2.96298	2.6582	2.78945	2.8275	3.06996	2.61314	3.06248	2.64534	2.42088	2.50111	2.80889	2.45722	2.37235	2.48863	2.77583	2.40896	2.51823	2.67837	2.07433	2.68279	2.67008	2.88777	3.08156	2.95533	2.81062	0.0418133	2.69389	0.446265	0.658504	0.791628	-6.26226
BRD8	3.0684	2.71722	2.62638	2.9614	3.08133	2.75157	2.83347	2.95312	2.69991	2.53276	2.62313	2.53193	3.0824	2.91841	3.07177	2.93577	3.0286	2.58573	2.55635	2.30839	2.72518	2.41712	2.68165	2.78165	2.39504	2.43993	2.79271	2.50079	2.6245	0.280674	2.73195	3.77187	0.000684936	0.0114815	-0.530629
BRINP1	2.46605	2.30335	2.26599	2.44617	2.30839	2.45053	2.29573	1.73798	3.12037	2.82478	2.07433	1.75555	3.03503	3.89977	2.39284	3.37356	2.74522	2.35547	2.21564	2.65652	2.40459	2.37997	3.1469	2.14012	1.57382	1.86962	2.72354	1.7907	2.28157	0.263693	2.44945	1.43596	0.161019	0.338358	-5.36242
BRWD1	1.7799	1.69138	1.94078	1.70858	1.94526	1.74248	1.90642	1.7799	2.09687	1.85808	2.20525	2.0446	2.06721	2.29172	1.94991	2.10251	2.3877	1.93045	1.753	1.91412	1.99518	1.86515	1.80256	2.40231	2.14469	1.55404	2.22924	2.09749	2.10118	-0.0119494	1.97545	-0.141502	0.888388	0.939016	-6.35168
BSG	4.40466	3.93619	3.9937	3.53838	3.47714	3.99524	4.46299	2.77398	2.66924	2.90414	3.10102	3.86246	3.97041	5.02671	4.14249	4.16074	4.35968	3.91008	3.60121	4.29884	3.85564	4.12916	4.92512	3.94338	3.56635	3.51926	3.41229	3.59504	3.55405	-0.0486606	3.83068	-0.237816	0.813587	0.894093	-6.3334
BST2	2.13652	2.60082	3.0703	2.88136	2.84558	3.1057	2.718	3.63433	3.10481	3.8095	3.22267	3.01688	3.0838	2.58127	3.09323	3.24089	2.66596	3.65661	3.45097	3.11224	2.41524	2.95757	2.59108	2.62473	2.79048	2.7621	1.93516	3.07769	2.50596	0.1656	2.9204	1.06986	0.292933	0.491648	-5.79885
BTBD1	3.07263	3.58356	3.59763	2.92595	3.78002	3.39741	3.25393	2.97152	2.83212	3.09844	3.02744	3.28894	2.97293	3.31196	2.84582	3.13373	3.2612	3.16912	3.22267	3.1057	3.40352	3.27038	3.31349	3.44469	3.4006	3.28451	3.15202	3.43859	3.46084	-0.108143	3.24212	-1.23122	0.227491	0.417962	-5.62068
BTBD2	2.73742	2.77398	2.72399	2.5034	2.58991	2.66873	2.82009	2.35308	1.94629	2.44854	1.99518	2.42761	3.12868	3.37248	3.07733	2.91462	3.18669	2.72249	3.04212	2.87998	3.02259	2.91382	3.23849	3.15398	2.58764	2.43691	3.05227	2.64779	2.90563	-0.197288	2.76799	-1.58033	0.124171	0.286545	-5.1596
BTBD3	2.50016	3.14868	3.19815	2.70549	3.26481	2.67008	3.11734	2.06402	2.44718	2.40273	2.29312	3.02909	3.16975	3.067	3.00049	3.07394	3.06165	2.46605	3.03525	2.74579	2.70577	2.79349	3.38142	3.10912	2.53514	2.85849	2.75294	2.73897	2.99514	-0.00703161	2.83901	-0.0578174	0.954265	0.973729	-6.36004
BTF3	3.9937	3.74899	3.74048	3.96063	3.86246	4.03893	3.64805	3.41874	3.59367	3.67041	3.2806	3.82783	3.59905	3.74647	3.44579	3.44172	3.69218	3.86379	3.80836	3.76629	3.7948	3.67203	3.61785	3.32749	3.74807	3.95729	3.83977	3.70426	3.68255	-0.0430724	3.70663	-0.556574	0.58181	0.736618	-6.20729
BTG1	3.24248	2.92918	3.26999	3.69046	3.57896	3.81183	3.83977	3.8095	3.81552	3.30773	3.41874	2.48195	3.77142	3.49053	3.57842	3.58144	3.49111	3.374	3.02768	3.33679	3.32591	3.01202	3.07546	2.83591	3.54547	2.1759	3.10912	3.41925	2.96086	0.377137	3.32094	2.85914	0.00752806	0.0471431	-2.73951
BTG2	3.48947	3.42407	3.66334	3.91996	4.10258	4.0118	4.08328	3.31737	4.20751	3.62673	3.05781	2.49021	3.59289	3.19874	3.65426	3.57938	3.32136	3.09954	4.26064	3.73052	4.59827	3.9654	3.5179	2.89251	4.74539	5.30508	3.62112	4.87053	2.8465	-0.381465	3.73083	-1.73509	0.0926483	0.240119	-4.92408
BTG3	2.06898	2.13404	2.07365	2.32592	2.40032	2.15628	2.12387	2.42729	2.44057	2.19204	2.13224	1.65692	1.92967	2.2609	2.11164	1.5662	2.10118	2.05952	2.30207	2.05635	2.05555	2.11369	2.09275	1.83901	3.10481	2.76501	2.44787	2.84731	2.73791	-0.244858	2.22495	-2.0884	0.045059	0.148484	-4.32111
BTN2A1	2.72658	2.77903	2.18999	2.85297	2.84628	2.69797	2.71296	3.77899	3.77351	3.33331	3.54439	3.38027	1.74404	1.73798	1.73947	2.08585	1.97299	2.79995	2.59647	2.50804	2.79924	2.61314	1.10201	2.57076	3.09897	3.29779	2.83849	3.41147	3.00179	-0.0200419	2.70809	-0.0856508	0.932294	0.963404	-6.35804
BTRC	2.60055	2.14469	2.16695	2.1698	2.21353	2.06455	2.24992	1.51813	1.7637	1.85701	2.04574	1.92595	2.63819	2.87889	2.77976	2.48565	2.66358	2.04296	2.09335	2.1568	2.57517	2.3448	2.62255	2.68224	2.47363	1.84547	2.57628	2.15569	2.67665	-0.108705	2.29008	-0.856878	0.398081	0.590677	-5.99824
BUB3	2.54641	2.61226	2.59506	2.57808	2.80375	2.50047	2.46888	3.13113	3.05491	3.05285	3.0653	2.84864	2.42976	2.34279	2.47076	2.35179	2.50408	2.6955	2.47523	2.38152	2.4353	2.40191	2.28726	2.64924	2.65268	2.40825	2.29212	2.47197	2.44336	0.201858	2.58453	2.31931	0.0271305	0.10773	-3.88233
BZW1	2.41712	2.30551	2.3171	2.47172	2.41094	2.07488	2.10448	2.31288	2.01724	2.04296	2.19836	2.02557	2.56893	2.5498	2.19774	2.55072	2.29087	2.23506	2.09812	2.12634	2.36224	2.183	2.96749	1.98134	2.68019	2.78861	2.01019	2.95232	1.88744	-0.0703329	2.3148	-0.65049	0.520163	0.691649	-6.15118
BZW2	4.29884	4.41671	4.11332	3.91799	3.67884	4.01759	4.11812	3.53311	3.93075	3.4837	3.77798	4.4444	3.53781	3.91275	3.87872	3.84328	3.83619	4.34254	4.4444	4.14031	4.66736	4.20751	3.81701	4.37918	4.22906	4.07727	3.87322	3.96171	4.4444	-0.289443	4.04566	-2.78792	0.00897685	0.052977	-2.89861
C11ORF21	2.92984	2.85124	3.33286	3.19393	2.79995	3.33407	2.77445	3.30256	3.74738	2.89195	3.02657	3.19393	3.64237	3.24904	3.23817	2.99588	2.93607	3.2303	3.16372	3.32669	2.54867	3.31627	3.01843	3.47535	2.72574	1.48925	3.65125	1.56199	3.7913	0.201965	3.05997	1.07394	0.291132	0.490185	-5.79463
C11ORF24	3.28215	3.62463	3.0083	2.72601	3.17012	2.45513	2.67639	2.29442	2.22414	2.39211	3.24027	2.60777	3.21029	2.70819	2.56798	3.2806	2.77612	2.3436	2.69991	2.56635	2.84182	2.60382	3.41147	1.99167	2.95312	3.36988	2.41373	3.22629	2.96911	0.0553559	2.81501	0.365586	0.717155	0.829581	-6.29489
C11ORF58	3.60458	3.50271	3.45397	3.49689	3.42407	3.48493	3.27954	3.09141	3.16654	3.22629	3.32136	3.33445	3.00179	3.47714	3.08184	3.17693	3.38696	3.5323	3.3572	3.40951	3.2685	3.4603	3.29816	3.45097	3.17479	3.47486	3.19999	3.66265	3.46136	-0.0716826	3.35386	-1.04702	0.303179	0.502349	-5.82221
C11ORF68	3.75889	3.29705	3.13928	3.43323	3.13295	3.40434	3.27884	2.80639	2.79535	2.76349	2.6022	2.90898	3.58732	3.65954	3.59289	3.87322	3.62673	3.17045	3.39623	3.16497	3.27853	3.13995	3.62529	3.52279	2.58968	2.95722	3.28782	2.93517	3.08409	0.0948077	3.23493	0.738299	0.46588	0.649564	-6.09104
C11ORF71	3.21088	2.65482	2.7113	2.61525	2.68195	2.75843	3.04104	2.77294	1.73353	2.71898	2.36929	2.80044	2.95722	3.7456	2.77073	3.55918	3.24397	2.95926	3.2267	3.15432	3.067	2.85015	3.60386	3.15148	2.02481	3.41643	2.84103	2.64754	2.42558	-0.103492	2.88668	-0.64249	0.525274	0.694886	-6.15629
C12ORF29	2.06588	2.04041	1.9715	1.9932	2.04761	1.92238	1.87528	2.01575	1.59178	2.12508	2.3088	2.02826	1.9592	2.37725	2.1129	1.96224	2.42976	1.89619	2.13174	2.00954	1.87062	1.88744	2.24579	2.3865	2.31545	2.41166	1.97618	1.87849	2.31666	-0.0618584	2.07426	-0.766153	0.449374	0.635652	-6.07043
C12ORF4	2.59587	2.48923	2.7979	2.76556	2.54009	2.76409	2.36066	2.72999	2.89829	2.74172	3.3794	2.7621	2.42558	2.53618	2.3975	2.81112	2.68385	2.61993	2.36881	2.55365	2.52507	2.67939	2.69225	2.72168	2.42761	2.51661	2.2102	2.34133	2.66184	0.160475	2.6206	1.92554	0.0633684	0.188234	-4.60988
C12ORF43	2.03726	1.9769	1.98027	2.01178	1.92674	2.10719	2.1187	2.0809	2.13652	2.4516	2.0331	2.49717	2.07365	2.2	1.57846	1.98203	1.68321	2.10776	2.09129	2.03506	2.2926	1.98203	2.39785	2.63609	2.24625	2.46315	2.46706	2.07488	2.31146	-0.207292	2.13727	-2.45418	0.0199309	0.0889799	-3.61127
C14ORF132	3.1185	3.70426	3.13846	3.03402	3.10172	2.59476	2.81602	2.25147	3.35419	3.95191	3.29705	2.02342	4.39225	3.52103	2.33041	3.89694	3.2814	2.51783	1.90446	2.28609	2.91949	2.54543	2.50467	2.69141	1.12602	1.68949	2.55135	2.19374	4.16074	0.740939	2.85857	3.07158	0.00440472	0.033925	-2.25176
C15ORF39	2.68637	2.4783	2.44195	2.65349	2.61586	2.41058	2.53971	2.29047	2.09129	2.35179	2.50047	2.29798	2.17726	2.32021	2.4948	2.75294	2.27308	2.67691	2.50309	2.66947	2.78211	2.75371	3.42315	2.8629	3.15398	3.2867	2.3887	3.45196	2.09335	-0.403253	2.60078	-3.56281	0.00120927	0.0155891	-1.05985
C16ORF72	2.3865	1.84342	1.94629	1.97299	1.87062	1.83789	2.0331	1.73353	1.62371	1.59997	1.67353	1.88417	2.53587	2.20525	2.19053	2.30426	3.00622	1.97058	2.00075	2.10649	1.95759	1.9862	2.20867	2.10719	2.40273	2.1568	2.25272	2.50768	2.13833	-0.111534	2.08426	-0.985886	0.331814	0.530653	-5.88241
C17ORF75	1.2853	2.27172	1.50931	1.12602	1.01621	1.4116	1.25373	1.55228	1.59766	1.61971	2.06836	1.93699	1.57163	1.88186	1.88647	1.94629	1.9567	1.37954	1.72956	1.20874	1.25373	1.74091	1.99406	2.16092	1.78636	1.78107	2.1841	1.30374	2.0063	-0.0700561	1.66969	-0.542192	0.591559	0.742644	-6.21513
C18ORF25	2.88734	2.22268	2.50309	2.50557	2.37725	2.50529	2.3925	2.23677	2.26325	2.11624	2.55938	2.65567	2.47139	2.96298	2.79485	2.57014	2.64149	2.55465	2.49021	2.69172	2.81112	2.2865	2.69579	2.71241	2.64032	2.36032	2.64249	2.51129	2.65733	-0.0780886	2.54207	-0.960621	0.344168	0.541474	-5.9063
C19ORF53	3.25469	3.17753	3.26674	3.33203	3.17157	3.15951	3.46904	2.40589	2.58268	3.36915	3.53838	3.59008	3.57472	3.41776	3.34282	3.68502	3.67884	3.31196	3.40828	3.34566	3.14239	3.31772	3.57661	3.07836	3.0072	2.27865	3.94779	2.04906	3.10481	0.164377	3.22707	1.06459	0.295276	0.493453	-5.80428
C19ORF54	2.7979	2.70549	2.7087	2.78999	2.54715	2.64779	2.48038	2.82505	2.50467	2.85922	2.86729	3.00379	2.92815	3.01596	2.70762	2.43078	2.70732	2.6022	2.6668	2.56513	2.67908	2.81466	2.4353	3.06334	2.17296	2.62116	2.87843	2.36805	2.57045	0.117103	2.68844	1.45779	0.154944	0.331272	-5.33282
C1D	2.52452	2.86774	2.67283	2.4093	2.67639	2.59245	2.54584	2.69523	2.50309	2.49393	2.5475	2.88902	2.15982	2.83061	2.65907	2.70248	2.73998	2.76725	2.29212	2.54889	2.54641	2.76068	2.58411	3.04629	2.4827	2.80178	2.47465	2.39504	2.78211	-0.00527856	2.62041	-0.0679691	0.946246	0.970085	-6.3594
C1GALT1	2.14928	2.2594	2.23865	2.14573	2.0446	2.09812	2.09129	2.5746	2.33602	2.2321	2.58035	2.42479	1.84547	2.16159	2.1155	2.27038	2.21939	2.0809	2.19374	2.19888	2.16498	2.15164	2.15569	2.54543	2.24483	2.43775	1.97299	2.26802	2.41524	-0.0130617	2.22818	-0.1813	0.857311	0.922444	-6.34525
C1ORF105	3.13776	2.24828	2.96991	3.2287	2.1818	3.31737	2.97711	3.69218	2.11624	2.6649	1.47615	2.09749	2.87156	1.84451	1.86203	2.50631	1.8088	4.69158	3.59504	3.64156	3.95306	4.66736	4.59194	3.30076	5.17148	4.69158	4.69158	3.84663	5.68045	-1.84744	3.29393	-7.78358	8.73e-09	4.76e-05	10.0886
C1ORF115	2.92485	2.88316	2.70672	2.65996	2.36358	3.11167	3.56031	2.89086	2.75514	3.09107	2.51881	3.46735	2.57485	2.87615	3.12002	2.36224	3.3589	3.58542	3.95577	4.02082	3.28589	3.13373	2.88109	4.26064	3.16497	2.98072	4.2552	2.87726	3.2985	-0.579375	3.13537	-3.70085	0.000831708	0.0130191	-0.711664
C1ORF35	2.75208	2.69464	2.58378	2.78389	2.67346	2.65054	2.70792	2.61465	2.69906	2.89574	2.75553	2.81602	3.20567	3.0838	3.04721	3.48217	3.34973	2.59562	2.58713	2.68863	2.63062	2.61644	2.62725	2.60872	1.9426	2.26937	2.63336	1.84015	2.49915	0.408762	2.7012	3.924	0.000450453	0.00874135	-0.139015
C1ORF50	2.61022	2.37363	2.46127	2.49361	2.51204	2.57517	2.26374	1.9715	1.99923	2.26847	2.22175	2.52145	2.50832	2.76234	2.70792	2.63233	2.66924	2.52325	2.60082	2.38447	2.27078	2.3925	3.04967	2.61796	2.51973	2.2246	2.89724	2.22175	2.65482	-0.0855493	2.47965	-0.918705	0.365336	0.562235	-5.94464
C1ORF54	3.13995	2.47867	2.94398	3.397	3.55797	3.42276	2.93204	3.92164	3.43968	3.38184	3.27605	3.52969	3.05172	2.36881	3.17103	3.32013	2.52325	2.99221	3.65426	2.32183	2.48565	3.25965	3.21501	2.28768	3.61704	2.89066	2.19153	2.57014	2.72143	0.317422	3.03667	1.93201	0.062533	0.186845	-4.59875
C1QB	2.20375	2.30288	4.19649	3.21207	4.28937	3.56697	3.42644	5.30508	4.15142	5.02671	4.47613	3.01052	5.00987	3.12037	4.65272	4.62019	2.557	4.63567	3.94057	3.58865	3.57938	3.18608	3.36748	1.81128	2.70524	2.63707	1.77854	2.60024	2.28857	0.821161	3.49127	2.47343	0.0190595	0.0863936	-3.57174
C1QTNF1	3.46136	2.83821	2.98416	3.45097	3.28451	3.22081	3.53037	1.79698	1.80256	2.1698	2.53697	1.67012	3.32286	3.39581	2.94566	2.89402	3.0622	3.07495	3.23505	3.33407	2.94909	3.7511	4.80845	2.69523	3.87614	5.04478	3.90761	3.59428	3.05586	-0.765411	3.16186	-3.21899	0.00301014	0.0274487	-1.90275
C1R	2.54811	2.46199	3.5467	3.69388	4.14704	3.39623	3.44357	4.44007	4.15645	4.28371	3.90602	2.78563	4.21005	3.12977	3.17985	3.61224	2.81818	3.93459	4.01759	3.50333	3.90128	3.02458	3.33929	1.75013	3.92767	3.64156	2.58244	3.68957	2.28105	0.215841	3.42595	0.898449	0.375865	0.573284	-5.96259
C1S	2.7434	2.9369	3.80245	3.7499	4.19908	3.56511	3.6226	4.58054	4.68458	4.77837	4.0118	3.41268	4.81824	3.46589	3.86379	3.82251	3.1469	4.10868	4.28937	3.5467	3.97175	3.1469	3.13596	2.0652	3.68404	2.82779	2.62809	3.22081	2.23064	0.59758	3.5883	2.5316	0.0166344	0.0782155	-3.45108
C2CD2	2.63584	2.78861	2.65567	2.73185	3.04104	2.89693	2.53885	3.12291	3.29357	2.52507	2.99889	2.34083	2.92271	2.2563	2.32934	2.57603	2.4509	2.56575	3.28245	2.29442	2.15032	2.14983	2.19267	2.1372	2.86847	2.83061	2.96298	2.9561	2.81708	0.111422	2.66597	0.877852	0.386771	0.58181	-5.98045
C2CD5	2.97844	3.20091	3.39141	3.11878	3.28363	3.50333	3.17045	3.6505	3.53962	3.39496	3.32366	3.11878	3.20764	2.94622	3.26042	3.06114	3.1185	3.23244	3.08824	3.13651	3.03918	2.71479	2.57397	3.5521	2.4093	2.4729	3.17753	2.60659	3.44579	0.296971	3.1282	2.7413	0.0100627	0.0568031	-3.00151
C2ORF42	2.75682	2.53917	2.85248	2.81285	2.81085	2.56481	2.78638	3.14481	3.19458	2.85151	2.60055	2.9108	2.9718	2.48565	2.88849	2.82947	2.5294	2.8642	2.65115	2.67778	3.0838	2.96547	2.48733	2.87293	2.66212	2.45652	2.85605	2.63062	3.13995	0.0169164	2.78891	0.203759	0.839872	0.911589	-6.34092
C2ORF49	2.67222	2.53945	2.64057	2.83296	2.4086	2.77697	2.59136	3.02346	2.88681	3.3662	2.65243	3.58467	2.32934	2.49115	2.21604	2.11933	2.22876	2.83675	2.65054	2.81202	2.72999	2.72354	2.66133	2.72546	3.07148	2.60602	2.67168	2.53667	2.83968	-0.0705087	2.69743	-0.601986	0.551557	0.715423	-6.18122
C3	2.39648	2.06213	3.05365	2.4149	3.05311	3.01771	2.97048	4.24022	3.374	3.60865	1.91729	3.24089	4.092	3.14897	3.40467	2.31234	2.09945	3.93619	5.17148	3.2147	3.49392	1.91321	2.71032	2.21564	3.83381	3.35599	2.1692	3.45248	2.43078	-0.193028	3.04499	-0.685235	0.498283	0.675401	-6.12826
C4ORF19	2.13404	2.073	1.91412	1.96476	1.88417	1.86849	2.22414	1.87273	1.8519	2.45962	1.9862	2.12986	1.2853	3.43551	1.87623	1.78107	1.49805	2.15532	1.95759	2.30426	2.01527	2.05555	2.80044	2.21766	3.13072	1.6289	2.40708	2.28902	2.3958	-0.265732	2.12403	-1.71173	0.096925	0.246231	-4.9608
C5	1.75125	1.64074	1.68477	1.94078	1.85882	1.93045	1.73647	3.00147	2.90115	3.38306	2.55203	1.39089	3.74477	2.23064	3.05972	2.72574	2.8168	1.90926	2.01575	2.34249	1.80763	1.98692	1.22521	2.61644	1.32543	1.42497	2.06588	0.924913	1.46466	0.614372	2.11928	2.7596	0.00962272	0.0550605	-2.96125
C5AR1	2.15569	2.37526	2.43922	2.22175	2.35955	2.4978	2.02277	3.14079	4.05919	2.67066	3.35599	2.07844	2.48624	1.59332	3.02058	2.50376	1.67686	2.67036	2.56365	2.33352	2.97152	2.6582	2.6611	0.94637	3.53037	3.03525	2.01527	3.14571	2.08994	-0.0424852	2.52687	-0.187538	0.852459	0.919769	-6.3441
C5ORF15	2.4488	2.73718	3.00857	2.72331	3.11943	2.83061	3.10234	3.15759	2.8275	2.93607	2.75789	3.20385	2.88159	2.97375	3.0874	2.8362	2.96547	2.91796	3.39275	3.09141	3.12977	2.9171	2.92361	2.66269	3.10234	2.86096	2.5673	3.04912	2.82636	-0.0359436	2.93238	-0.442804	0.660979	0.793768	-6.26379
C6	2.75318	1.62371	4.29291	3.6808	4.69158	2.6442	4.8549	4.40466	1.29107	4.17307	2.00075	3.6497	4.75658	5.79593	4.23753	3.91008	4.24965	4.1587	3.7652	4.76685	2.95025	3.23426	3.59981	4.4309	3.03586	2.48236	2.58296	2.62841	2.40349	0.3699	3.55343	0.96693	0.341055	0.539022	-5.90039
C7	3.38656	3.62112	4.05218	3.69135	4.07294	4.05058	3.72519	4.23489	4.40025	4.92512	4.34628	3.51926	4.28642	3.74807	3.87734	3.62819	3.54896	4.29577	4.30665	3.92164	4.62906	3.17985	2.78593	3.88093	4.19649	2.93261	2.98947	3.46326	3.05259	0.311735	3.81893	1.69017	0.101019	0.252918	-4.99432
C7ORF25	1.54253	1.60819	1.43299	1.32983	1.47615	1.39912	1.4923	1.92773	1.64074	1.63722	1.62157	1.90316	1.61599	2.06898	1.43957	1.51813	1.76998	1.59997	1.69654	1.48925	1.43957	1.57163	2.11624	2.20867	1.88744	1.82672	2.37317	1.56931	2.20375	-0.218668	1.70367	-2.23163	0.0329983	0.120522	-4.05282
C8ORF33	2.74552	2.85044	2.49021	2.23461	2.63393	2.22557	2.61056	1.67499	2.2236	2.27172	2.06784	2.10448	3.99524	2.77049	2.7775	2.28688	2.21721	2.57628	2.64729	2.17682	2.79429	2.70044	3.23177	2.59219	2.53917	3.14272	2.56671	2.81735	2.51609	-0.210537	2.56834	-1.36359	0.182509	0.363238	-5.45773
C9ORF16	3.4684	3.53311	3.47103	3.36915	3.26154	3.23577	3.55079	2.99248	2.96217	3.09599	2.7047	2.8292	3.83228	3.44081	3.60262	3.19458	3.56233	3.195	3.39785	2.99322	2.90792	3.64726	4.02259	3.44642	2.54066	3.04275	3.84911	2.87541	2.79404	0.074388	3.26963	0.546846	0.588396	0.741169	-6.21262
CA12	2.95079	2.3837	2.478	2.53315	2.42203	2.39134	2.41453	2.28068	1.93334	2.00307	2.32064	2.3421	2.69251	3.06588	4.19908	2.89115	2.82009	2.62024	2.45722	2.73824	2.58944	2.59901	2.75664	2.36559	2.30288	2.53852	2.86008	2.46538	2.26705	0.0487253	2.57525	0.323857	0.748219	0.849654	-6.30925
CA3	1.21651	7.54135	1.46053	1.42497	1.59766	1.12602	1.27247	2.87519	4.77837	2.54263	2.63791	1.25991	4.47207	1.7907	2.63848	2.90438	3.94779	1.25991	2.00805	1.32084	2.89927	1.78636	1.11454	1.54253	1.79583	1.20343	2.14169	1.09082	3.42545	0.876641	2.31295	1.78286	0.0843951	0.226814	-4.84774
CAB39	3.27773	3.50393	3.2985	3.35085	3.45248	3.37112	3.65125	3.44954	3.15951	3.21788	3.29203	3.04851	3.08938	3.24189	3.05469	3.02621	3.46952	3.38696	3.21396	3.33286	3.59835	3.56371	2.83701	3.73629	3.27381	3.4986	3.48428	3.47392	3.47535	-0.114786	3.33897	-1.43159	0.162256	0.339909	-5.36829
CABIN1	2.78662	2.89748	2.9718	2.74661	2.73417	2.93298	3.03586	3.05922	2.36838	2.77371	2.51482	2.28726	3.539	3.11051	3.86659	3.78556	3.17389	3.01252	2.85297	3.08606	2.94622	3.12175	3.21605	2.968	2.62638	2.07778	3.53668	2.33486	2.32592	0.133458	2.92033	0.851576	0.400974	0.593354	-6.00267
CACNA1A	2.66133	2.45513	2.55434	2.85015	2.77472	2.81466	2.50631	2.90248	3.73928	3.29779	3.13135	2.00729	2.92302	2.44819	2.83236	2.47396	2.73254	2.80822	2.50498	2.88109	2.66712	2.52607	2.54425	2.09204	2.45053	2.78638	2.75736	2.98947	2.11933	0.176974	2.69765	1.38281	0.176595	0.356934	-5.43284
CACNA1C	3.19002	3.22055	3.08133	2.41373	2.42558	2.75396	2.67837	2.59804	2.7084	2.46127	2.47197	3.09662	2.80208	2.72601	3.18937	2.4031	2.62341	2.98038	2.86345	2.54295	3.07867	2.98695	2.73493	3.30518	3.06415	3.41687	2.56798	2.71479	3.10234	-0.191034	2.83457	-1.78101	0.0847024	0.227193	-4.85072
CACNB2	2.03566	1.98027	3.0052	1.95759	2.36311	2.56023	3.89694	2.23259	2.39387	2.64646	1.69984	2.54361	2.94858	2.63791	3.66334	2.45053	3.01551	3.05469	3.54439	4.08328	2.66567	3.24163	2.19204	3.67041	2.76725	3.21788	3.50718	2.77318	3.75206	-0.615733	2.84486	-3.03617	0.00482146	0.0358638	-2.33435
CACYBP	2.2594	2.43497	2.50557	2.28816	2.43565	2.34633	2.50995	2.60998	2.27308	2.32183	2.64754	2.76324	2.09068	2.22222	2.04129	1.97299	2.48099	2.59774	2.62473	2.65789	2.44953	2.42761	2.40553	2.67778	2.78614	2.63448	2.81037	2.70248	3.1233	-0.293197	2.48626	-3.56799	0.00119248	0.0154638	-1.04686
CADM1	3.1846	3.23426	3.54783	3.25216	3.08409	3.16818	2.74392	3.12619	2.8642	3.00433	2.74579	3.26237	2.76262	3.46326	2.78288	2.85151	4.1068	3.33374	2.74552	3.36748	3.54615	3.35241	3.16169	2.81202	3.59763	3.13872	3.02801	2.81202	3.38518	-0.0615193	3.15398	-0.50543	0.616828	0.762261	-6.23426
CADM3	2.36311	1.97618	2.01527	2.17783	2.10719	2.06588	2.39284	3.59289	3.21534	3.35455	1.3162	1.95083	2.7611	2.1852	2.16278	1.32543	2.5109	2.40273	2.32385	2.78638	2.42519	2.2766	2.09504	1.68949	2.3289	3.39658	3.2563	2.63365	1.5662	-0.109771	2.36739	-0.51831	0.607918	0.754418	-6.22771
CALB2	2.30551	2.3991	2.25478	2.6955	2.2321	2.4853	2.44517	4.01364	3.82053	3.11512	1.34755	2.47427	3.09817	2.38689	2.3505	2.0723	2.4149	2.89604	3.17753	2.72089	2.43691	2.75396	2.61314	1.54965	2.9121	2.1486	4.62906	2.68612	1.91982	-0.120632	2.63294	-0.492734	0.625669	0.768764	-6.24055
CALCOCO1	3.39316	3.19002	3.43076	3.50624	3.18866	3.54285	3.52103	2.8839	2.73155	2.9171	2.68663	2.93714	3.57731	3.49392	3.64507	3.35765	3.43408	3.49483	3.36946	3.56697	3.58607	3.3624	3.55146	3.54022	3.23108	3.00049	3.94494	3.46589	3.41049	-0.199356	3.3435	-1.88241	0.069187	0.198986	-4.68331
CALCOCO2	3.755	3.55975	4.01581	3.73141	3.60596	4.0191	3.80374	3.46486	3.55608	3.6364	3.53037	3.48658	3.25118	3.34048	3.39825	3.57044	3.15675	4.00505	3.84453	4.16577	4.08808	4.03498	3.56031	3.7937	4.33839	3.83013	3.91127	4.21462	4.40466	-0.434655	3.76116	-4.71701	4.82e-05	0.00252499	1.96423
CALCRL	2.80236	2.07844	2.91411	2.70221	2.52507	2.38562	2.55399	2.94375	2.71983	3.43028	3.05691	3.30629	2.8149	1.98934	1.91231	2.6326	2.49021	2.64589	2.68841	2.79895	3.06588	2.5746	2.60931	3.24466	2.40494	2.92862	2.00892	2.60409	2.58991	-0.0181012	2.66974	-0.129711	0.897632	0.945493	-6.35328
CALD1	3.50825	3.44803	3.07519	3.25705	3.01202	3.1923	3.05616	3.25244	3.53781	3.33968	3.30337	2.72704	2.92984	2.68721	2.81285	2.47493	3.1057	2.60309	2.92763	2.62421	3.28024	3.06474	2.8375	2.53587	3.08156	3.57842	2.97875	3.09107	3.1784	0.119378	3.05177	1.06002	0.297318	0.496406	-5.80897
CALM1	3.41004	3.48893	3.44954	3.38306	3.33203	3.25549	3.24604	3.10376	3.26583	3.39741	3.16687	3.53668	3.02373	3.27981	3.33203	2.85464	3.1561	3.26674	3.20415	3.49277	3.29316	3.51607	3.16912	3.74048	2.91104	3.29117	3.10714	3.38027	3.38478	-0.0376635	3.291	-0.487398	0.629402	0.771265	-6.24315
CALM2	4.21005	4.20751	4.42678	4.30665	4.31593	4.34628	4.14905	4.16343	4.21977	4.07727	4.21462	4.46711	3.91275	3.78002	3.76822	3.87734	3.98452	4.35968	4.27545	4.25237	4.10414	4.37215	3.80245	3.79915	3.95306	4.46299	3.67286	4.19377	3.85996	0.050447	4.12191	0.553908	0.583612	0.73787	-6.20876
CALU	3.50772	3.67977	3.37684	3.12717	3.01279	3.04132	3.27112	2.65141	2.43465	2.71953	2.85684	2.88709	2.98836	3.33407	3.35814	3.26402	3.4837	3.01052	2.70927	2.93973	3.62112	3.54439	3.40875	3.11734	3.23609	3.08576	3.42233	3.38656	3.35639	-0.119194	3.16665	-1.03065	0.310671	0.510787	-5.83866
CAMK2B	4.12007	3.99836	3.74647	3.98813	3.34726	3.76716	3.87989	2.84937	3.51282	2.88316	3.50933	3.45542	3.56767	4.09826	4.10258	3.86124	4.01759	3.62112	3.47261	3.54728	3.85039	3.94494	3.80618	3.78922	3.28823	3.57346	4.13602	2.93043	3.72613	0.0480165	3.66865	0.358699	0.722249	0.833177	-6.29738
CAMK2G	2.76891	2.72969	2.63927	3.01305	2.78416	2.79297	2.74552	3.34398	2.89402	2.66515	2.80694	2.64924	3.24089	3.03343	2.85818	2.95079	3.12037	2.93456	2.8123	2.84962	2.66464	2.85097	2.85745	2.58152	2.1698	2.40524	2.96749	2.59444	2.68841	0.186466	2.80734	2.18372	0.0366653	0.128908	-4.144
CAMK2N1	3.20701	3.20669	3.04187	3.22587	2.88159	3.16761	3.18363	2.50631	3.39098	3.01619	2.76634	3.19662	3.02801	2.78945	2.94909	3.13651	2.78389	3.15082	3.59367	3.17876	3.22771	3.31463	3.44265	2.75514	3.21501	3.5179	3.83619	3.22436	3.07204	-0.265977	3.13816	-2.81064	0.00848849	0.0511586	-2.84811
CAMLG	2.57216	2.83923	3.01202	3.00098	3.34523	2.8032	2.5135	2.8995	2.93357	3.15082	2.98774	4.67629	1.9102	2.37603	1.55228	1.88417	2.41712	2.67465	2.75533	2.62841	2.64385	2.64702	2.75022	3.02909	2.70448	3.45295	3.08107	2.4958	2.80505	-0.048363	2.77731	-0.241292	0.810916	0.892737	-6.33257
CAMSAP1	2.77398	2.77185	2.70193	2.78444	2.65033	2.77583	2.84349	2.66833	3.00098	3.01279	2.93126	3.22803	2.7098	2.57957	2.80473	2.35669	2.52005	2.62584	2.68134	2.77151	2.76831	2.711	2.39721	3.18139	2.66648	2.59678	2.93973	2.62638	2.63233	0.05489	2.7487	0.690818	0.494815	0.672995	-6.12447
CAMSAP2	3.07792	2.66596	2.87101	2.84155	2.62897	2.82779	2.71534	2.12445	2.55072	2.4827	2.42203	2.968	2.37235	2.74494	2.48195	2.32969	2.81898	2.54361	2.54834	2.58536	2.64316	2.7084	2.6543	3.10513	3.25507	2.9718	2.82587	2.89086	3.03586	-0.171372	2.71352	-1.81606	0.0790336	0.217223	-4.79369
CAMTA2	3.18669	3.10317	2.98467	3.24507	3.08912	3.12444	3.3448	3.05388	3.00885	3.1995	2.77119	2.93891	3.22436	3.22771	3.32136	3.13627	3.03742	3.20539	3.29073	3.0757	3.20791	3.13463	3.45768	3.12745	2.98151	2.85985	3.14511	3.06876	2.88261	-0.00228364	3.11844	-0.0346127	0.97261	0.983613	-6.36111
CAND2	3.22524	3.76629	3.63582	3.26923	3.35673	3.55918	3.52469	3.26443	3.48064	3.24807	3.54022	3.95306	3.24935	3.539	3.05412	3.28102	3.43634	3.60744	3.1805	3.79791	3.95729	3.67798	3.28754	3.9588	2.81112	2.47901	4.28113	2.8629	4.31263	-0.0835359	3.46889	-0.551693	0.58511	0.738908	-6.20998
CANT1	2.8489	2.76556	2.78312	2.69436	2.82094	2.71325	2.91159	2.67254	2.6075	2.71162	2.67465	2.05267	2.91159	2.68798	2.41269	2.73897	2.49809	2.5746	2.84558	2.44751	2.56481	2.66975	2.76634	2.87567	3.04752	3.03188	3.05513	2.88236	2.55728	-0.0997127	2.71808	-1.20943	0.235631	0.427956	-5.64607
CANX	3.753	3.52402	3.85039	3.48846	3.09599	3.44019	3.62112	3.8252	3.34048	3.33679	3.91275	3.51607	3.09599	3.43225	3.19322	2.95975	3.52716	3.40434	3.18579	3.1499	3.36418	3.7088	3.03151	3.16946	2.93043	3.57408	2.87541	3.61224	3.34006	0.186612	3.38824	1.80633	0.080575	0.220147	-4.80962
CAP2	4.02082	3.56985	3.66506	3.48601	3.47804	3.81072	3.51676	2.99193	2.46165	3.03788	3.26369	3.48428	3.22834	4.06306	3.8956	3.56371	4.08328	3.70164	3.44315	3.68878	3.60458	3.63003	3.49596	4.27863	2.90656	3.15202	3.50889	2.97987	4.58054	-0.0737888	3.53763	-0.454656	0.652521	0.787386	-6.25849
CAPN1	2.43391	2.86443	2.54232	2.82144	2.70627	2.63393	2.87889	2.56671	2.57216	2.57429	2.44336	2.61196	2.84707	3.03479	2.58713	2.84505	2.43626	2.9108	2.79763	3.07122	2.75634	2.95641	3.25588	2.90145	2.6125	2.97271	3.03586	2.79098	2.85409	-0.239069	2.76951	-3.31547	0.00233796	0.0232714	-1.67006
CAPN15	2.24483	1.9102	1.89529	1.98934	1.68161	1.86962	2.35843	2.38065	2.35511	1.83269	1.74091	1.51266	2.80236	2.12741	2.69251	2.55763	1.99518	1.97384	2.11038	1.693	2.03663	2.1585	2.52662	1.78937	2.38447	2.29659	1.93045	2.40421	1.88307	0.0155703	2.10805	0.128232	0.898793	0.945796	-6.35347
CAPN2	3.21891	2.77073	2.91874	3.17753	3.11193	3.14399	2.99539	3.28516	3.01279	3.02991	2.94967	3.18363	2.99514	2.80018	2.80152	3.02933	2.77294	3.18579	3.14052	3.34398	3.11571	2.90337	3.12649	2.94676	3.06025	3.29316	3.02058	3.0436	2.95817	-0.0832489	3.04607	-1.27861	0.210515	0.399145	-5.56405
CAPN3	2.40146	3.47344	2.65733	2.57247	3.05136	2.31896	2.36517	2.99427	3.31349	2.68019	2.95208	2.2495	3.09016	2.59476	3.69388	2.96826	2.1635	2.41627	2.57429	2.65115	2.8839	2.50238	1.919	2.67972	1.72085	2.55331	3.77562	2.36929	2.56481	0.245605	2.69486	1.451	0.156815	0.333419	-5.34208
CAPN5	2.11164	2.25228	2.20375	2.13224	1.95984	2.0188	2.36689	2.44554	2.64675	2.53445	1.81605	1.87528	2.28033	1.90229	2.14799	1.95264	2.42597	2.23959	2.07365	2.00805	2.27953	2.25679	2.64924	2.1058	1.91639	3.09082	2.15734	3.38784	1.67991	-0.139662	2.23854	-1.04149	0.305693	0.505287	-5.82779
CAPN7	2.40524	2.29748	2.63533	2.63206	2.65371	2.2926	2.6	2.99297	2.74106	2.93577	1.83386	2.86902	2.3958	2.52083	1.65145	2.45296	1.96669	2.49147	2.22557	2.36689	2.48923	2.68663	2.50906	2.84815	2.84049	2.87726	2.02826	2.67552	2.98262	-0.121753	2.51372	-0.969734	0.339677	0.537822	-5.89775
CAPNS1	4.44007	4.47207	4.30958	4.21462	4.26609	4.27259	4.26609	3.91996	3.61785	3.7322	3.39825	3.83977	4.32998	4.62906	4.47207	4.48118	4.21462	4.22356	4.31263	4.46299	4.29291	4.39571	4.88255	4.11332	3.49392	4.24965	3.66506	3.92888	3.87322	0.0113128	4.1645	0.0862064	0.931856	0.963404	-6.35799
CAPRIN1	3.41776	3.03343	3.33374	3.46643	3.24248	3.16084	3.23633	3.47218	3.40917	3.31627	3.69388	3.5015	2.67346	3.24248	3.34398	3.19002	3.26481	3.47103	3.05172	3.05536	3.2985	3.53838	3.19786	3.59694	2.97072	2.74947	2.87615	2.52112	3.26004	0.16177	3.22711	1.5891	0.122176	0.283382	-5.14675
CAPRIN2	2.85985	3.13741	2.77398	3.2476	3.30337	2.87156	3.03317	2.9384	3.14207	3.04104	2.84835	2.76526	3.18738	3.01471	3.10595	2.85297	2.96086	3.28635	3.00073	3.067	3.17657	3.05513	3.00292	3.32669	2.98918	2.68019	3.17389	2.71853	3.47261	-0.0742097	3.03565	-0.951912	0.348498	0.545368	-5.9144
CAPZA1	2.46456	2.49257	2.61022	2.54954	2.96658	2.768	2.4353	3.55405	3.22771	3.19999	3.24248	2.48695	2.84864	2.45547	2.82065	2.40349	2.45296	3.02204	3.09719	2.48452	2.44854	2.9481	2.55763	2.10448	2.87074	3.03859	2.29707	2.8269	2.15734	0.109052	2.71835	0.831538	0.412023	0.602919	-6.01918
CAPZA2	3.36946	3.56308	3.36295	2.66712	3.21396	2.9435	2.8839	3.29437	3.44747	3.35241	3.58938	3.65125	2.3822	2.48038	2.21564	2.0587	2.391	3.21029	3.16111	3.03788	3.21145	3.27737	2.76914	3.13373	3.37809	3.46486	3.25705	3.48108	3.82899	-0.275425	3.10613	-1.73225	0.0931602	0.240874	-4.92857
CAPZB	3.55859	3.46326	3.49931	3.27884	3.5323	3.31311	3.53441	3.45143	3.41319	3.3624	3.15559	2.86492	3.6241	3.62748	3.73928	3.32788	3.26632	3.55608	3.69311	3.52402	3.62673	3.61355	3.36295	3.29117	3.41925	3.5534	3.15369	3.51341	3.25588	-0.0511071	3.43364	-0.663348	0.512006	0.685747	-6.14283
CARD8	2.41453	2.5294	2.45921	2.18946	2.58968	2.58573	2.30207	3.19662	3.34693	2.23064	2.70157	2.33313	2.80128	2.27358	2.87047	2.9171	2.4579	2.59933	2.93357	2.3712	2.55966	2.6295	1.7637	1.88862	2.8702	2.70391	2.17296	3.05781	2.51783	0.0942669	2.56095	0.710504	0.482698	0.663011	-6.11087
CARF	1.93334	1.91639	1.92674	1.86849	1.89224	1.8126	1.67991	2.61908	2.55938	2.03663	2.50995	2.30029	2.24434	1.92773	2.02642	2.18862	1.82056	1.78107	1.79447	1.85288	1.81128	1.76844	1.39089	2.40107	1.43616	2.11682	2.37079	1.612	2.2203	0.194597	1.99375	1.71711	0.0959251	0.245232	-4.95237
CARM1	2.73283	3.05922	3.05616	3.00996	2.69741	2.88212	3.32366	2.60249	2.03218	2.30504	2.37687	2.70627	3.13494	3.34906	3.06356	3.92767	3.33203	3.05642	3.18284	3.397	3.13596	3.27446	4.03498	3.117	3.13042	2.98858	3.16266	2.69877	2.69797	-0.239277	3.01616	-1.58909	0.122177	0.283382	-5.14676
CARS2	3.10747	2.57363	2.46511	2.82452	2.9898	2.90656	3.09449	3.1233	2.1841	2.87672	3.07733	2.9561	2.62473	2.81536	2.68385	2.7881	3.08133	2.98608	2.88849	2.90621	2.99991	2.7788	2.83427	3.06499	2.70015	2.76409	2.85044	2.41994	3.60934	-0.0665485	2.86121	-0.655196	0.517169	0.689011	-6.14814
CASC3	2.67148	2.82452	2.66975	2.89979	2.93043	2.89195	2.94132	2.87864	2.69251	2.91104	2.63927	2.68663	2.93075	2.93157	2.88411	2.80587	3.10014	2.83778	2.81389	2.8158	2.65876	2.82223	2.78835	2.66802	2.77669	2.75347	2.7987	2.70415	2.77697	0.0726728	2.8105	1.37773	0.178143	0.35839	-5.43945
CASD1	2.90656	3.12094	3.10658	2.67254	2.5711	2.76914	3.00885	2.73768	2.81062	2.87101	3.00319	2.76698	2.88777	2.9499	3.00319	2.87156	3.07177	2.90512	2.49361	2.65317	2.75605	2.86034	2.52289	3.34693	2.54095	2.34174	2.97711	2.58991	2.68663	0.167092	2.82082	2.0201	0.0520778	0.163919	-4.44439
CASK	2.53193	2.40146	2.71619	3.01949	2.87101	2.95208	2.41994	3.07867	3.20992	3.45498	3.00668	2.38614	2.77497	2.78135	2.70015	3.20631	2.64949	2.72305	2.66133	2.87371	2.69845	2.68863	2.53445	2.18474	2.34928	2.3421	2.54295	3.23005	2.37164	0.232955	2.73659	2.09354	0.0445671	0.147408	-4.31173
CASP1	2.13112	1.96924	2.46538	2.3436	2.49512	2.2102	2.2563	3.84554	3.05513	3.18139	3.31196	2.66437	3.02031	1.99518	2.59017	2.8253	1.98134	2.69964	2.39387	1.95526	2.29935	2.3887	2.4134	1.63879	2.81171	1.85701	1.40797	2.19635	1.75661	0.456778	2.41932	2.56709	0.0152981	0.074549	-3.37659
CASP3	3.16946	2.67465	2.64446	2.53166	2.62556	2.68771	2.65371	3.06967	3.04661	2.93491	3.28931	2.22414	2.3101	2.277	2.68744	3.23005	2.23019	2.19941	2.51881	2.49717	2.58502	2.8253	2.23865	2.69388	2.78058	2.49292	2.41133	3.39454	2.31048	0.143735	2.66327	1.14614	0.260501	0.456902	-5.71748
CASP4	1.67499	1.46466	1.63552	1.68771	1.51524	1.69654	1.61971	2.87315	2.15982	2.32969	2.52112	1.72667	2.10897	1.4116	1.6861	1.96835	1.63331	1.47615	1.6289	1.60403	1.8088	1.45315	2.22799	1.32084	2.71215	2.0188	1.3101	2.41851	1.54451	0.0718186	1.83576	0.465313	0.644957	0.782066	-6.25362
CASP8AP2	2.94455	2.74392	3.07792	2.9425	2.88438	3.12955	2.89829	2.68863	2.92763	2.88462	3.12564	3.26632	3.16266	3.00379	3.15926	2.90062	3.29357	3.24056	2.7959	2.96911	2.79819	2.57574	2.57864	3.68787	2.52145	2.25763	2.69012	2.24251	3.13526	0.21091	2.91472	1.89973	0.0667969	0.195096	-4.65398
CASP9	2.78416	2.72943	2.86818	2.81466	2.74084	2.88186	2.86847	2.59108	2.7824	2.49646	2.52391	2.73132	2.87371	3.00147	3.2117	3.1995	3.31159	2.7979	2.70732	2.75514	2.90248	2.91462	2.93491	2.97961	2.72546	2.58476	2.80714	2.183	2.8399	0.0866721	2.81183	0.99797	0.326012	0.525339	-5.87078
CASQ1	3.10595	3.68957	2.1585	2.62977	2.65013	2.60024	3.37633	2.07635	3.04576	1.87623	2.35511	1.55228	2.9318	2.8882	3.92627	2.62584	2.64351	2.75465	2.48762	2.87	3.31772	3.64237	2.93261	2.75682	3.09599	3.34159	4.60506	3.32413	3.20445	-0.48078	2.91258	-2.27471	0.0299864	0.113632	-3.96964
CAST	3.52585	3.24668	3.59428	3.40609	3.26812	3.38829	3.45343	3.0874	2.93942	3.14239	3.23075	3.51394	3.13295	3.52161	3.08514	3.34239	3.20701	3.44134	3.18965	3.57346	3.40828	3.65857	3.26369	3.43551	3.31886	3.3097	3.48318	3.35639	3.50209	-0.112565	3.34574	-1.60852	0.117849	0.278316	-5.11807
CAT	3.5067	3.92495	3.58356	3.59428	3.44997	3.65661	4.03102	3.62112	3.56436	3.82154	4.46299	3.50825	3.39825	3.74738	4.34946	3.64507	3.94929	3.78104	3.46277	3.39406	3.6505	3.75598	3.36042	3.84453	2.4664	3.01892	3.22834	2.47933	3.40609	0.433113	3.57459	3.14576	0.00363984	0.0307245	-2.07714
CAV1	4.60506	3.9937	4.40466	4.09415	3.87322	4.19649	4.16074	3.59008	3.78104	3.85564	3.22206	4.16074	3.75791	3.9167	3.57731	4.10868	4.26861	3.90408	4.35339	4.30238	3.80618	4.07517	3.95729	3.63815	3.2458	4.40466	4.55257	4.51149	3.70164	-0.0632163	4.00068	-0.473995	0.638822	0.778434	-6.24956
CAV2	4.13102	3.89841	3.88958	3.77672	3.64077	3.80245	3.57541	3.40161	3.77023	3.72519	3.2756	4.0329	3.16169	3.45974	3.18338	3.21565	3.33445	3.7499	3.96171	3.84453	3.75889	3.91275	3.46785	3.49053	3.54491	4.05919	4.19377	4.16577	4.17307	-0.255841	3.71026	-2.35205	0.0251939	0.103373	-3.8175
CAVIN1	3.81072	3.72784	3.14627	3.38068	2.97742	3.18213	3.49988	3.45498	3.60527	3.36875	3.38102	3.33286	3.03682	2.95025	3.09986	3.12809	3.24904	3.06387	3.20352	2.95641	3.02587	3.45143	2.83061	2.88878	3.12809	3.36336	3.19815	3.22524	3.08008	0.195689	3.23267	2.21841	0.0339759	0.123103	-4.07813
CAVIN2	3.1995	3.08712	3.06996	3.67446	2.60137	3.18393	2.78999	3.05	3.24397	3.08795	3.47714	3.97569	2.51027	3.018	3.20992	3.20992	2.80794	3.00777	2.56402	2.69821	3.043	3.19322	2.33891	3.31463	2.22175	2.71619	3.4827	2.0865	3.02909	0.321244	2.99631	2.22537	0.0334587	0.121552	-4.06483
CBFA2T2	2.75347	2.85151	2.88052	2.91411	2.50768	2.9614	2.63175	3.02887	3.32206	2.73155	2.70071	2.7824	3.22206	2.79845	3.00596	3.14511	2.95926	2.93607	3.03119	3.02031	2.86465	2.85518	2.36971	2.71722	2.92888	2.44451	3.00262	2.60872	2.83728	0.0925713	2.85563	1.09285	0.28287	0.481276	-5.77486
CBFA2T3	2.32748	2.80208	2.23412	2.34849	2.43327	2.29002	2.35511	2.29707	2.49147	2.45755	1.95439	2.09335	2.89693	2.40459	2.9614	3.15178	2.57784	2.23259	2.60659	2.56758	2.47465	2.23865	2.69195	2.26895	2.02277	2.93973	2.06455	2.67148	2.39425	0.0439712	2.45692	0.392701	0.697225	0.816762	-6.28464
CBLB	2.40459	2.04837	3.15894	2.58944	2.75964	3.18608	3.78104	2.58476	2.71592	2.64702	2.45366	2.19888	3.38994	3.2238	3.47804	3.04819	2.88935	3.0838	3.018	3.14052	2.58296	2.80559	2.30794	3.0661	3.50271	3.09257	2.47867	2.91437	2.65349	-0.0308928	2.86912	-0.202026	0.841215	0.912379	-6.34127
CBR4	2.83728	2.78107	2.551	2.48195	2.68547	2.57076	2.5916	2.93157	2.65733	2.73363	3.01871	3.24429	2.27486	2.70157	2.45445	2.51308	2.8067	2.53514	2.78913	2.58653	2.90898	2.76465	2.6668	2.64385	2.34887	2.91104	2.52179	2.52695	2.92302	0.0189682	2.68835	0.225531	0.823045	0.900404	-6.33625
CBX1	2.12858	2.43691	2.10448	2.13833	2.45686	2.25679	2.12741	2.24483	2.29748	2.30607	2.64351	2.90656	2.08358	2.20273	2.18346	2.06402	2.48795	2.36689	2.23865	2.25893	2.16795	2.32673	2.2495	2.30207	2.38527	2.09129	2.59043	2.21451	2.75843	-0.0310122	2.31104	-0.37446	0.710609	0.824984	-6.29162
CBX3	2.2102	2.67283	2.48762	2.21406	2.53697	2.26471	2.18573	2.92384	2.82811	2.8042	3.01499	3.03432	1.84759	1.92238	1.88307	1.61971	1.67828	2.42976	2.31331	2.37526	2.59804	2.59619	2.06277	1.84547	3.03835	2.97375	2.76409	3.18363	2.80265	-0.221433	2.45213	-1.38215	0.176793	0.356934	-5.43369
CBX5	2.61314	2.79485	2.66596	2.64446	2.73667	2.60602	2.60777	2.53514	2.47107	2.18946	2.41627	2.61056	2.73185	2.88316	2.81788	3.01052	3.04941	2.73444	2.81735	2.8238	2.63233	2.71404	2.80375	2.95582	2.44088	2.60837	2.83531	2.84216	2.72856	-0.0750742	2.70072	-1.00125	0.324448	0.523902	-5.86759
CBX6	3.2685	3.24362	3.00121	3.28823	3.51607	3.15559	3.24544	3.75791	3.54547	3.42407	3.54728	3.24127	2.60695	2.76725	2.44517	2.8489	2.76262	3.02031	3.28589	2.96488	3.018	2.86653	2.67602	2.46088	3.24321	3.15467	3.74807	2.91841	3.3233	0.100115	3.11537	0.772054	0.445923	0.632695	-6.06597
CBY1	3.43672	3.28967	3.33679	3.49328	3.36915	3.37589	3.39454	2.63448	2.69089	2.81898	3.38306	3.29155	3.46536	3.52402	3.44315	3.32749	3.62529	3.30773	3.08514	3.37248	3.51504	3.15759	3.39316	3.60744	2.8991	2.86465	3.43968	2.83189	3.5316	0.0377963	3.27261	0.355219	0.724828	0.835268	-6.29862
CC2D1A	2.10897	2.57517	2.29355	1.9607	2.24525	2.09387	2.22703	2.0337	2.26288	1.90754	1.6681	1.82788	2.58502	2.47427	2.44953	2.3421	2.53697	2.33769	1.79831	2.80794	2.46511	2.3704	2.74252	2.62024	2.39785	1.98692	2.95669	2.82666	2.4031	-0.264793	2.3209	-2.34351	0.0256863	0.104409	-3.83446
CCDC121	1.45315	1.61599	1.51813	1.66683	1.37019	1.65145	1.5662	1.57163	1.74762	2.01963	1.68161	2.31589	1.76217	2.02277	1.89529	2.1852	2.10056	1.62722	1.4923	1.73513	1.54451	1.59997	1.97384	3.02031	1.32983	1.37954	2.28726	1.18037	2.36478	-0.0213951	1.78205	-0.147713	0.883525	0.93595	-6.35078
CCDC130	2.8269	2.89351	2.80587	2.92963	2.97931	3.13685	3.07519	3.13846	3.12779	2.91796	2.87179	2.66133	2.87047	2.69797	2.79349	3.02396	2.69089	2.71722	2.94483	3.16592	3.08409	2.93544	2.70415	2.60103	3.22947	3.08042	3.35765	3.04485	2.8032	-0.0640382	2.93481	-0.836717	0.409149	0.600725	-6.01495
CCDC28A	2.72089	2.85248	2.78362	3.20828	3.25867	2.73022	3.14795	3.2855	3.36875	3.44416	3.20828	2.62313	3.51061	2.4283	3.23535	3.08576	2.76465	2.64149	2.51823	2.63555	2.58325	2.37235	2.45686	2.69089	2.73469	1.96316	2.51308	1.99256	2.888	0.539448	2.8154	4.77222	4.11e-05	0.00236077	2.11323
CCDC40	2.26374	1.90926	2.05133	2.29573	2.06402	1.73647	2.32639	2.73185	3.07313	1.6681	2.8311	1.83601	2.9864	2.33937	2.76914	3.0584	2.15794	2.08504	2.15794	2.34083	2.13652	2.21353	2.08504	2.16795	1.67353	1.47261	1.9862	2.43012	2.23821	0.276435	2.24434	1.90445	0.0661577	0.193747	-4.64594
CCDC51	2.90199	2.61759	2.84301	2.9022	2.7047	2.69251	3.01596	2.58737	2.76164	2.94909	2.57574	3.31038	3.08409	3.23214	2.99066	3.03079	3.15023	2.92693	2.67094	3.16761	3.02142	3.15398	3.12687	3.02373	2.30551	2.46352	3.00747	2.36262	2.82666	0.0648418	2.87612	0.648464	0.521455	0.692274	-6.15248
CCDC59	2.0446	2.39616	2.30923	2.12801	2.38035	2.29398	1.80125	2.13892	2.03804	2.17902	2.33352	2.56798	1.99011	2.28768	2.09456	2.21406	2.27436	2.26422	2.27523	1.99406	1.90926	2.20867	2.30379	2.53478	2.55331	2.25727	2.34887	2.22268	2.48452	-0.0754976	2.23547	-0.996598	0.326668	0.525773	-5.8721
CCDC6	2.59506	2.183	2.34708	2.20159	2.0885	2.10386	2.2043	2.60777	2.23821	2.65764	2.65544	1.87623	2.26705	2.48129	2.39425	2.58127	2.35715	2.1083	2.00729	2.28288	2.25763	2.47396	2.277	2.14573	2.5109	2.34279	2.23677	2.31234	2.22649	0.0783363	2.3111	0.993766	0.328023	0.526741	-5.87484
CCDC69	2.07433	2.83088	2.3792	2.24251	2.41308	2.3873	3.14329	2.11933	2.58013	2.10118	2.4149	3.04789	2.68134	2.64808	2.15365	2.77425	2.81112	3.48428	3.28516	4.0329	3.47906	3.09871	3.27381	2.73155	3.32013	3.30256	3.85185	3.3624	3.07769	-0.840551	2.86561	-6.77948	1.36e-07	8.23e-05	7.51358
CCDC71	2.88236	2.71432	2.88462	3.21113	2.56304	3.02505	3.12291	3.35599	2.97462	3.28283	3.0667	2.96686	2.1452	2.71432	2.04837	2.64675	2.40459	3.04275	2.93043	3.20669	2.75129	2.83061	3.4827	3.27654	2.81842	3.17985	3.01521	2.52729	3.16372	-0.194694	2.90466	-1.58092	0.124037	0.286357	-5.15874
CCDC85B	3.23467	3.74381	2.75045	2.95079	2.76585	3.19097	2.97349	2.15425	2.52325	2.3289	2.73849	2.13342	3.09082	3.92495	3.44019	3.97569	3.41776	2.57397	2.77073	2.55042	2.67665	3.17615	3.64884	2.45225	2.48099	2.95367	3.34048	2.11817	2.66212	0.236164	2.92214	1.27657	0.211224	0.40021	-5.56652
CCDC90B	2.59245	2.92842	2.63504	2.81389	3.06087	2.61196	2.67094	2.99456	2.82009	2.92512	3.18307	3.02657	2.49322	2.56272	2.47363	2.53382	2.36144	2.93433	2.64385	2.63707	2.6559	2.71927	2.8702	2.23019	2.64002	3.05136	3.08042	2.76185	2.70415	0.00229213	2.74539	0.0252268	0.980036	0.987565	-6.36139
CCDC91	2.52566	2.7621	2.88777	2.11038	2.83701	2.70448	2.54867	2.63504	2.80044	2.47623	2.62281	3.04451	2.46127	2.6611	2.51482	2.27172	2.778	2.86602	2.38152	2.69877	2.59369	2.77928	2.63336	2.85464	2.84731	2.27259	2.90656	2.30288	3.2855	-0.0758436	2.65738	-0.779761	0.441439	0.628667	-6.0601
CCDC92	3.85564	3.66265	3.7499	3.69637	3.35814	3.78319	3.93619	2.80018	2.85869	3.23609	2.87567	3.32099	3.9167	3.98671	3.56909	4.16343	4.06115	3.7611	3.7456	4.27863	3.92627	4.00342	4.05739	3.85315	3.46693	3.85717	4.09415	3.70503	3.57541	-0.282073	3.695	-2.11432	0.0426227	0.143117	-4.27353
CCDC93	2.68579	2.7084	2.78714	2.77639	2.84835	2.7969	2.63206	2.78312	2.60515	2.72856	2.05952	3.16441	3.15587	2.90898	3.54022	2.26374	2.56924	2.82271	2.45445	2.93043	2.74422	2.76556	2.66619	3.90408	2.67094	2.30961	2.28564	2.3198	3.15797	0.0128862	2.76019	0.0915852	0.927616	0.961104	-6.35751
CCL11	2.31748	2.39824	3.06248	2.57429	2.33403	3.22947	2.18742	3.92338	3.03634	2.72399	4.48603	2.61825	2.61734	1.73118	3.1549	4.35968	2.23373	3.83228	3.5145	3.15734	3.05259	3.60121	3.69486	1.18037	3.82154	4.7882	0.58514	4.20751	2.40191	-0.271461	2.99399	-0.784817	0.438512	0.626626	-6.05621
CCL2	3.18738	3.02964	3.6115	3.721	3.41874	3.52829	2.28431	3.6005	4.16806	1.58714	4.63567	2.8151	2.64149	2.42558	1.61971	4.27259	2.53725	5.20097	5.26827	3.07495	4.79923	5.56279	5.73277	1.50666	6.65891	6.8633	3.24027	6.8633	2.49292	-1.64944	3.80511	-3.51954	0.0013586	0.0165737	-1.16792
CCL8	1.8497	1.82056	2.41956	1.88543	2.29624	2.42628	1.79968	3.32669	2.17241	3.17985	4.68458	1.27247	3.63433	1.52643	1.2853	4.27545	0.983302	3.48601	3.86379	1.85386	2.29707	2.63114	3.36454	1.07701	4.43545	2.89195	1.48275	4.75658	0.837933	-0.345922	2.54539	-0.842796	0.405792	0.597242	-6.00995
CCN1	3.75206	3.82783	3.36988	5.00987	3.14833	4.48603	2.45652	3.92627	4.50718	2.38152	2.14424	1.86203	3.60195	3.37724	1.84759	2.58013	2.71927	1.73236	3.36532	1.88744	3.88654	3.38568	3.39998	2.10319	5.11991	4.31593	3.40434	5.73277	1.93148	-0.120237	3.28493	-0.307819	0.760277	0.858342	-6.31431
CCN2	3.65574	3.95191	3.25393	5.11991	4.12007	4.52242	3.81817	3.26335	4.41671	4.26064	4.32624	1.9862	4.62019	3.25807	2.86902	3.55608	3.40161	0.266263	1.91412	2.35145	2.50665	2.8995	3.11973	1.83386	3.44134	3.98303	2.10649	2.17837	1.88417	1.4145	3.20294	4.74666	4.42e-05	0.00246196	2.04422
CCNC	2.92616	2.957	2.64754	2.76747	3.11973	2.76611	2.21877	3.27446	3.43172	3.12175	3.43727	2.2312	2.78337	2.41818	3.06387	2.92984	2.61941	2.85097	2.82094	2.64121	2.8151	2.7881	1.54678	2.54328	2.89351	2.81007	2.88411	3.04513	2.64779	0.174938	2.79313	1.27931	0.21027	0.398957	-5.5632
CCND1	3.18363	3.38656	3.07867	2.91796	2.89547	3.02991	2.8375	2.75157	3.26999	3.35599	3.38518	3.26004	2.75634	3.08133	2.83849	2.78885	2.90172	2.89927	2.54584	2.33846	2.5294	2.97572	2.8243	2.97214	2.46385	2.6022	2.85577	2.11478	2.78533	0.383384	2.88366	4.06569	0.000303803	0.00701964	0.229998
CCND2	4.28371	3.52046	3.79915	3.36799	3.24056	3.39581	3.5534	3.342	3.5467	3.36988	3.52643	3.76926	3.31385	3.71286	3.7969	3.25082	3.98163	3.43784	3.31886	3.02768	3.55029	3.61645	2.99561	3.89273	3.33236	2.83871	2.82094	2.65054	3.56371	0.320978	3.44197	2.65028	0.0125441	0.0649325	-3.19936
CCND3	3.20923	3.40647	3.21681	3.13198	3.28325	3.18428	3.35158	3.23426	3.18669	3.71475	3.09046	2.68721	3.81072	3.1176	3.54547	3.02505	2.87128	3.15675	2.98318	3.3662	3.41687	3.24127	3.21814	2.87128	2.63114	3.04967	3.6771	2.83323	3.19815	0.102326	3.1969	0.969746	0.339671	0.537822	-5.89774
CCNE2	1.29657	1.25991	1.35654	1.48275	1.24131	1.27886	1.4116	1.88081	2.47227	1.612	2.60906	1.80256	1.86749	1.67828	1.78331	1.2853	1.4116	1.5807	1.29107	1.49805	1.36459	1.40386	1.58519	2.28332	1.55404	1.52643	1.8795	1.74404	1.91729	-0.00448465	1.63304	-0.0338082	0.973247	0.983892	-6.36114
CCNG2	2.18001	2.1585	2.28203	2.58476	2.60082	2.23614	2.42661	3.02232	2.97817	3.40609	2.78785	2.37797	3.82783	1.74404	2.89574	2.17531	2.42628	2.19729	2.00892	1.91321	2.16695	1.67686	1.42497	2.6955	1.93788	1.22521	1.9715	2.10719	2.20159	0.634146	2.33233	3.77319	0.000682474	0.0114815	-0.527269
CCNH	3.13347	3.16111	2.87	3.24056	3.38742	2.96658	2.79297	2.84449	2.98228	2.79404	2.86579	3.03014	2.62219	2.9898	2.78662	2.7917	3.0436	3.27189	3.03976	3.31038	3.12207	3.55918	3.20445	2.79535	3.5467	4.21005	3.13072	3.29246	3.0123	-0.33229	3.09649	-3.20944	0.00308595	0.027826	-1.92561
CCNI	4.28642	4.29884	4.33568	3.99836	3.99836	4.35968	4.44007	3.82053	3.67203	4.06888	4.02411	3.64571	3.9465	3.94779	3.88363	3.99684	4.16577	4.11091	3.91799	4.14704	3.97812	4.15479	3.63295	4.17591	3.91275	3.72613	4.31973	3.65339	4.23489	0.0552555	4.02944	0.612905	0.544405	0.710871	-6.17466
CCNJ	2.01527	1.92674	2.14928	2.18054	1.74762	2.22414	1.89914	2.31234	2.21808	2.16695	2.39504	1.86849	1.9216	1.7742	1.90754	1.64074	2.0497	1.97855	1.88862	1.6681	1.486	2.02642	2.02642	2.19941	2.6097	2.62977	2.09504	2.19598	2.05058	-0.047838	2.04317	-0.475406	0.637827	0.777744	-6.24889
CCNL1	3.08261	3.17546	3.05922	3.33087	3.28215	3.31038	3.13526	3.41004	3.73141	3.23005	3.2612	2.75264	3.04941	3.12595	3.22142	3.83619	3.01521	2.97844	3.43634	2.80071	3.48893	3.05031	2.7369	2.9465	4.06888	2.87772	2.59562	2.91898	2.45053	0.206696	3.15032	1.6276	0.113723	0.271748	-5.08961
CCNT2	2.09504	2.4366	2.46233	2.19774	2.29047	2.3101	2.25727	2.37765	2.86345	2.59709	2.97484	2.84558	2.5185	1.90549	2.321	1.89914	2.17419	2.27259	2.36394	2.36559	2.11369	2.3677	1.87062	3.02887	2.10897	2.22974	2.2246	2.27821	2.76526	0.0514286	2.36263	0.450406	0.655549	0.789402	-6.26041
CCPG1	2.81112	2.78835	2.97844	2.66924	2.81414	2.81536	2.92941	2.83296	2.65764	2.6326	2.67008	2.58856	2.84787	3.10259	2.67465	2.63637	3.31196	2.91437	2.71775	2.9481	2.87672	2.81761	2.73022	3.29203	2.58244	2.46511	2.83263	2.77669	3.31929	-0.0465894	2.82877	-0.549743	0.586431	0.739719	-6.21104
CCR1	2.07778	1.67686	2.73155	2.33532	2.78165	2.61796	2.32385	4.41203	3.50333	4.12705	4.23489	3.25082	3.26335	1.67012	2.20325	4.02696	1.92674	3.57286	3.55273	2.76324	2.8642	2.90115	2.95533	1.33876	3.04104	2.66901	1.3162	3.41319	1.34383	0.247674	2.78948	0.789571	0.435771	0.623955	-6.05254
CCR9	2.01803	1.73647	1.24732	1.92967	1.67991	1.612	1.68477	1.777	1.32543	1.51524	1.63722	1.76844	2.02826	2.43601	2.3101	2.27396	2.33891	1.52071	1.773	1.59997	1.89822	1.73513	2.27396	1.90446	1.81128	1.9884	2.30207	1.9207	2.05952	-0.0566733	1.86573	-0.49182	0.626308	0.768993	-6.241
CCT2	3.46486	3.50825	3.31311	3.33929	3.3448	3.24027	3.38994	3.25965	3.00668	3.29203	3.416	2.94001	2.56272	2.96086	2.61879	2.59587	3.19911	2.81708	2.89604	3.38068	2.9465	3.32713	3.192	2.15913	3.64805	4.04454	3.00777	3.80494	3.57896	-0.0893183	3.18121	-0.607347	0.54804	0.713474	-6.17801
CCT3	2.5365	3.0855	2.95582	2.55728	3.26083	2.82975	2.9494	2.41956	3.10885	2.95817	2.41917	2.58268	3.06785	2.82558	3.0115	3.46693	2.25727	2.35955	2.55665	2.56055	2.7959	2.56115	3.00408	2.06898	2.98096	2.96853	2.68489	2.7447	2.39541	0.200632	2.75772	1.72909	0.0937314	0.242006	-4.93355
CCT4	3.52279	3.3954	3.46904	3.37305	3.30256	3.45143	3.43596	3.1713	3.08409	3.24056	3.23535	3.19322	3.06087	3.25011	3.22239	3.08075	3.2238	3.29357	3.25933	3.16372	3.29891	3.2651	3.19911	3.20184	3.46735	3.11	3.36492	3.30584	3.54728	-0.0125325	3.2824	-0.206729	0.837572	0.910542	-6.34031
CCT5	3.32873	3.41776	3.397	3.22498	3.17217	3.34048	3.47059	3.58421	3.11973	3.73052	3.30666	2.3448	3.41105	3.01359	2.39872	2.1187	2.74279	3.08606	3.18503	3.21145	3.26154	3.33374	3.14297	3.36799	3.66688	3.7511	3.26335	3.60458	3.38027	-0.22973	3.21991	-1.65891	0.107208	0.261569	-5.0423
CCT6B	2.0337	2.14288	1.90642	2.03435	2.01019	2.14068	2.07919	1.94348	2.36358	1.70141	2.02106	2.44336	1.44669	1.60202	3.54842	1.65692	1.79968	2.28033	2.15734	2.53725	2.3141	2.29398	2.56575	2.49717	1.58932	3.54365	2.81788	3.19851	1.90016	-0.423208	2.22653	-2.38596	0.0233207	0.0978216	-3.74969
CCT7	3.35814	2.92862	3.35122	3.4973	3.45714	3.41687	3.69994	3.10413	2.74579	2.96658	3.03889	3.08684	3.09416	3.45397	3.043	3.05972	3.42146	3.36988	3.39316	3.41319	3.46952	3.36988	3.31038	3.6505	3.21438	3.44019	3.50624	3.47962	3.60458	-0.216082	3.30846	-2.59922	0.0141741	0.0706036	-3.30856
CCT8	3.09016	3.40212	3.27954	3.13995	3.43172	3.02291	3.0254	2.98467	2.87156	2.96273	2.98228	3.08606	2.95975	3.21748	3.067	2.88083	3.20791	3.06996	2.96428	3.0057	3.28516	3.21748	3.13651	2.96408	3.31672	3.05285	3.20923	2.98888	3.31772	-0.0325538	3.1083	-0.492822	0.625608	0.768764	-6.24051
CD14	2.00237	2.09622	3.04212	2.82587	3.8352	2.99676	2.78972	4.22627	3.4986	3.1614	3.37157	2.89195	3.49643	2.47968	2.61105	3.5051	2.34319	4.49691	4.55864	2.76465	3.55553	4.05058	4.35968	2.27523	3.16975	3.73744	1.90229	4.67629	2.45015	-0.489557	3.21278	-1.77648	0.0854595	0.228101	-4.85803
CD151	3.50933	3.73417	3.47804	3.6364	3.70331	3.15587	3.92164	2.96	2.5226	3.61704	2.84349	2.31455	3.72975	3.70426	2.93973	2.81898	4.06692	3.15432	3.45196	3.44469	3.07263	3.45923	3.55405	2.70015	3.85185	3.48792	3.93075	3.41368	4.00017	-0.127406	3.38543	-0.766453	0.449198	0.635652	-6.07021
CD163	2.00402	1.79194	3.86659	2.97711	3.41643	3.36156	3.71637	4.8958	4.05058	5.06886	4.67629	2.95533	4.48603	3.13017	3.64315	3.68787	2.52763	4.8958	3.60458	4.05919	3.4684	3.0622	2.69797	1.55228	2.80293	3.42407	1.84342	3.72519	1.80992	0.465627	3.35178	1.36697	0.181455	0.362313	-5.45336
CD164	3.07733	2.97214	3.31772	2.70819	2.66947	2.59271	2.86678	3.00206	2.75991	2.99828	2.80587	2.70927	2.74995	2.7753	2.50047	2.85605	2.84372	2.9561	2.89495	2.70819	2.98228	2.7611	2.94054	3.0763	2.95158	3.12002	2.83591	3.067	2.4562	-0.0602456	2.86053	-0.781279	0.440558	0.628233	-6.05893
CD1D	1.56931	1.79583	1.56403	1.97941	1.84547	1.59766	2.10251	1.83601	0.966551	1.10201	1.48925	2.66515	1.81605	2.19635	2.0865	2.03566	2.04684	1.89529	1.777	1.81489	1.8063	1.80483	2.14169	1.96756	1.88862	2.13174	2.9318	1.72085	3.43672	-0.304211	1.93145	-1.82702	0.0773291	0.214266	-4.77568
CD200	2.61556	2.20525	2.29893	2.81868	2.85323	2.36478	2.16758	3.17317	3.28482	2.85384	3.36156	1.33432	3.01596	1.8519	1.99406	3.45923	2.21082	2.4437	2.63667	2.3811	2.3289	2.26895	2.47681	2.48863	3.47623	1.8088	2.87998	2.36437	1.65692	0.145961	2.51982	0.748307	0.45991	0.645697	-6.08372
CD209	2.54395	2.07919	2.65291	2.72518	2.51378	2.8126	2.39425	4.14704	3.67798	3.7622	2.90763	2.62869	3.30377	1.75429	2.93433	3.8587	2.09876	4.02411	3.44642	2.57485	2.90007	3.02373	3.31075	1.88647	3.16946	2.34249	1.88186	3.17586	1.97	0.0614719	2.84487	0.254342	0.800909	0.884976	-6.32933
CD248	3.07394	3.05781	2.96245	3.18338	2.70549	3.02768	2.95533	3.3233	2.59271	2.40032	1.58714	3.04629	3.64315	3.31543	3.35198	2.85355	4.10004	3.69388	3.75698	3.14297	3.1133	3.23467	4.69933	2.87209	2.76501	3.62913	3.0855	3.14795	1.85091	-0.238721	3.10937	-1.11336	0.274103	0.471806	-5.75307
CD2AP	1.35654	1.60202	1.64419	0.966551	1.32084	1.26611	1.26611	2.40494	2.01432	2.04761	1.54253	2.29522	1.12602	1.4186	0.983302	1.32983	1.34383	1.45315	1.78514	1.3162	1.06527	0.872996	1.56931	2.09275	2.17634	1.98934	1.58276	2.41133	1.97855	-0.165883	1.59385	-1.03222	0.309947	0.510001	-5.83709
CD34	2.94301	2.78638	2.93607	3.24544	3.1773	2.71698	3.1713	2.94622	3.14297	3.20601	2.06151	3.77562	3.46486	3.16084	2.9465	3.27489	3.53311	3.27981	3.58807	3.77798	3.26303	3.18839	3.49009	3.33203	1.87175	3.14655	2.81112	3.4312	3.09206	-0.101752	3.12969	-0.661765	0.513007	0.686081	-6.14387
CD36	4.573	4.64457	4.84176	3.89977	4.05739	4.40025	4.66736	4.55864	2.99828	3.50718	4.72833	3.74167	3.74899	4.46299	5.02671	4.10258	5.51918	4.76685	4.48603	4.54079	4.37551	4.26609	4.46299	4.62019	3.67041	3.9465	3.91799	3.73141	4.09594	0.082217	4.28825	0.43349	0.667657	0.798407	-6.26785
CD40	3.48792	3.20283	3.21243	3.47011	3.22239	3.19786	3.43727	4.20489	3.36709	3.64571	3.70708	2.97152	3.59091	3.02058	3.34159	3.65501	2.61105	3.58938	3.27737	3.39658	3.6241	3.39741	3.04485	3.02089	3.33596	3.08767	3.20283	3.35374	2.67439	0.122876	3.32246	1.03375	0.309242	0.509301	-5.83556
CD44	2.29935	2.21808	2.44299	2.5365	2.97987	2.29659	2.26506	3.99524	3.6808	3.49223	3.47623	2.59868	3.19755	2.07844	2.69741	2.42239	2.61702	2.59587	2.69706	2.30247	2.59742	2.48038	2.59187	1.16164	2.89463	2.73077	1.73353	2.67972	1.35171	0.463935	2.59005	2.24145	0.0322892	0.118553	-4.03397
CD47	2.94187	2.92247	3.07956	2.91973	3.29629	3.16051	3.47661	3.18738	2.97987	3.15759	2.86176	3.12927	3.17817	3.09505	3.05809	2.78563	2.85818	3.31075	3.61645	3.2612	2.9108	2.93382	3.03525	2.53254	3.52046	2.95846	3.52161	3.25867	3.15587	-0.103988	3.10703	-1.12073	0.271004	0.468443	-5.74516
CD53	2.60931	2.12141	3.27884	2.98072	3.50573	3.10829	2.64503	4.88255	4.48118	4.88255	4.55257	3.397	4.64457	2.91762	4.73762	4.41203	2.50079	3.69743	3.32827	2.67747	3.4587	3.01412	2.20578	1.46924	2.26193	1.9862	1.23317	2.4729	1.43957	1.18986	3.13457	3.72016	0.00078902	0.0125608	-0.662561
CD55	3.04661	2.81085	3.37068	2.9494	2.59709	3.05616	3.13961	2.57808	2.12194	2.47253	2.81818	2.14068	2.7902	3.10935	2.54617	3.00408	2.85985	2.82198	2.9022	2.95232	2.70897	3.24668	3.06811	3.03079	3.97991	3.22471	2.93456	3.55405	2.9672	-0.327049	2.92424	-2.56543	0.0153583	0.0745762	-3.38009
CD58	2.92842	2.99721	3.22239	3.12119	3.04275	2.54584	3.36336	2.76831	2.92941	2.83007	3.02346	3.57896	2.77472	2.77824	2.60464	2.57146	3.16946	3.02142	2.85409	3.54966	2.56402	2.80293	3.31772	2.90464	3.24163	3.30999	2.29312	3.19874	2.70157	-0.0240845	2.96584	-0.20495	0.83895	0.911309	-6.34068
CD59	4.20751	4.03102	4.29577	4.08808	3.95306	4.07727	4.27259	3.20283	3.81183	4.21977	3.54085	3.25045	3.59981	3.49988	3.51504	3.72008	3.65757	4.24022	4.27863	4.49197	4.55864	4.31593	4.40466	3.38994	4.63567	4.87053	4.44007	4.59827	4.98887	-0.61425	4.07437	-4.50277	8.87e-05	0.00358341	1.38841
CD74	4.33839	4.20489	5.09226	4.55864	5.14564	4.80845	3.93202	5.73277	5.06886	5.73277	4.40466	4.36397	5.73277	4.32624	5.86745	5.56279	3.7641	5.04478	5.14564	3.31886	4.82954	4.7882	4.33568	3.30337	3.25965	3.77672	2.51236	3.23997	2.95874	0.984855	4.45345	3.53555	0.00130135	0.0160549	-1.12798
CD84	2.56893	1.73798	1.92511	2.49393	2.58818	2.41599	2.13174	4.1869	4.47613	4.52242	3.8587	3.33806	4.03893	2.50906	4.32998	4.12007	2.14983	2.8067	2.46751	2.3975	2.61056	1.90144	1.84759	1.52071	1.4923	0.924913	1.07701	1.20343	1.20343	1.35294	2.58086	4.37201	0.000128431	0.00424444	1.0392
CD9	3.24362	3.6364	3.67884	4.50718	3.84911	3.49432	3.7641	2.24579	3.79791	4.02259	3.91396	3.27112	4.2552	3.67977	4.06115	3.73629	3.42092	3.1062	3.2685	3.85717	3.91275	2.72375	3.66603	2.32934	3.06907	3.90761	2.92408	3.26083	3.11081	0.419731	3.50739	2.3566	0.0249346	0.10285	-3.80843
CD93	3.45974	3.46643	3.4973	3.91396	3.65426	3.92495	3.62748	3.5521	4.07517	4.23489	3.47159	4.45466	3.30411	2.81708	3.41467	3.48947	2.92665	3.84911	4.15645	2.95975	3.753	4.1914	3.75598	3.12291	4.91185	4.02082	2.57363	3.15148	2.95507	-0.0118168	3.60986	-0.0613003	0.951513	0.972499	-6.35983
CD99	3.43225	3.47435	4.09826	4.02082	3.61294	3.83748	4.32624	3.54966	4.14031	3.63815	3.70426	3.08434	4.27863	3.76629	3.91275	3.58281	3.56635	3.7622	3.61575	3.8956	3.86246	4.1068	2.86705	3.44357	3.85315	4.14905	3.74647	3.47661	3.43452	0.0817922	3.73238	0.65589	0.516729	0.688864	-6.14769
CDC14B	2.91841	2.61556	2.73824	2.97048	2.99396	2.99915	2.57247	2.64949	2.56232	2.63033	3.08184	3.14922	2.48452	2.68819	2.45256	2.83088	2.60103	2.50079	2.73417	2.64754	2.372	2.5711	2.43147	3.15983	2.84182	2.96911	2.6044	2.45686	2.82249	0.0851328	2.72587	0.966783	0.341127	0.539022	-5.90052
CDC16	2.89195	2.85605	2.89634	2.99012	2.79429	3.00646	2.87519	3.24701	2.99485	3.0824	2.80293	3.04576	2.79924	2.68462	2.73493	2.83456	2.96029	2.8995	3.02621	3.09323	2.85491	2.97681	2.81842	2.65349	2.98416	2.77697	3.24507	2.74947	2.92665	-0.00548966	2.91386	-0.0849586	0.93284	0.963405	-6.35809
CDC23	2.47523	2.60695	2.32142	2.06836	2.89224	2.4948	2.15734	2.65706	2.66079	2.351	2.95158	2.54834	2.39946	2.60409	2.63393	2.3975	2.55883	2.47172	2.6844	2.42274	2.38152	2.56055	2.59709	2.6559	2.36358	2.40589	2.48	2.15628	2.63848	0.0315627	2.50335	0.395673	0.695054	0.81566	-6.28347
CDC27	3.06748	2.70704	2.74552	2.77497	2.80794	2.78003	2.86602	2.73132	2.9171	2.89066	3.26402	3.02169	2.4948	2.35511	2.46788	2.64351	2.56513	2.85491	2.87315	2.81868	2.77774	2.9663	2.61022	3.02002	2.90819	3.00292	2.92888	3.09844	3.01202	-0.135356	2.82661	-1.72649	0.0942041	0.242652	-4.93765
CDC34	2.96115	3.30896	2.84049	2.79716	2.78003	2.7922	3.04451	2.54066	2.85605	2.34849	2.30078	2.83701	2.86653	3.18284	2.89195	2.97742	2.85628	2.92003	3.18428	3.04661	2.93327	3.13266	3.38478	3.12649	3.2867	2.87237	3.13232	2.96887	3.08965	-0.255572	2.94002	-2.9775	0.00559546	0.0395398	-2.47008
CDC37L1	3.73928	3.24979	3.14449	3.2458	3.03432	2.90819	2.931	2.06455	2.88212	2.59271	2.93634	2.3665	3.18175	3.47159	2.93911	2.95025	3.22436	2.72727	2.8042	3.11299	3.11393	3.31886	3.13526	3.07519	3.11638	3.3356	2.99322	4.06503	2.85745	-0.146057	3.05233	-1.06602	0.294639	0.49334	-5.80281
CDC42	3.24635	3.10481	3.40567	3.0115	3.13776	3.23849	3.13872	3.52829	3.15926	3.36492	3.54547	3.33167	2.20478	2.70732	2.27598	2.52834	2.81649	3.41049	3.23609	3.15119	3.00408	3.28754	2.97629	2.74807	3.51676	3.95191	3.25507	3.66334	3.05136	-0.227143	3.13786	-1.64912	0.109211	0.264562	-5.05717
CDC42BPA	2.7031	2.96826	2.65033	3.33331	3.4312	3.19393	2.947	2.08719	2.55501	2.32306	2.58653	2.45921	3.59694	3.28589	3.48658	3.2003	3.73052	3.09016	3.14272	2.96686	2.66648	2.62556	2.93577	3.25965	3.17418	2.4978	2.75208	2.9481	2.91025	0.0587108	2.94855	0.40173	0.690636	0.813546	-6.28107
CDC42BPB	3.29357	3.45143	3.30666	3.2238	3.01181	3.53569	3.33407	2.97844	3.08042	3.22239	2.86626	3.09257	3.19364	3.2855	3.18139	3.1784	3.36664	2.96686	3.22081	3.10513	3.00777	3.08184	3.18393	2.59043	3.06588	3.22498	3.12147	3.20318	3.18839	0.131867	3.15736	1.8453	0.0745551	0.209346	-4.74543
CDC42EP3	3.72421	3.37248	3.33887	2.98608	3.03014	3.1784	3.1454	2.21564	3.28516	3.10376	2.93761	3.47011	2.52325	3.36492	3.11261	2.77294	3.40828	3.40951	3.47764	3.00545	3.47011	3.59621	3.20732	3.38887	3.45097	3.32366	3.0469	4.40827	3.02768	-0.285173	3.23388	-2.11626	0.0424457	0.142698	-4.26996
CDC7	1.6609	0.966551	1.25991	1.89529	1.3162	1.58519	1.37019	2.83891	2.19053	1.80483	2.33002	1.10201	1.55643	1.34383	1.93975	2.12567	1.50021	2.03967	2.07778	1.49528	1.95526	2.1187	2.73155	1.17074	2.92147	2.56055	1.20874	3.30076	1.85288	-0.426129	1.86965	-2.10946	0.0430703	0.144186	-4.28248
CDC73	3.31737	2.69652	2.79763	2.59647	2.65907	2.56697	2.54263	2.80265	2.54205	2.58439	2.86152	2.31288	2.70627	2.82408	2.76383	2.72113	3.28102	2.59271	2.62897	2.52325	2.59408	2.62778	2.15477	3.42233	2.1692	2.64754	2.58818	2.69012	2.94375	0.107903	2.69514	1.01016	0.320229	0.519874	-5.8589
CDH10	2.37363	2.10251	1.97234	2.29986	2.10386	2.31666	2.05952	1.53946	1.3162	1.25991	1.6719	1.76101	2.3865	2.56543	2.46854	2.40107	2.31896	2.11478	2.21353	2.42447	2.14233	2.29172	2.45652	4.47207	2.6602	2.00954	3.59211	2.0056	2.39284	-0.51068	2.26528	-2.52657	0.0168323	0.0788025	-3.46158
CDH11	2.17361	3.20764	3.18338	3.0888	3.42315	3.25705	2.06402	2.81007	3.34726	2.78999	3.16791	3.18809	3.06114	2.55763	2.9037	2.92542	3.07733	2.48301	2.66712	2.60082	2.68411	2.64474	2.85818	2.57957	2.24579	2.94301	2.31048	2.60602	2.36066	0.372523	2.80033	3.11676	0.00392241	0.0321155	-2.14565
CDH13	3.71812	3.26881	3.13596	2.59774	2.90951	2.96029	2.64351	2.25997	3.37248	2.72202	2.67837	3.5323	2.92595	3.07148	3.0052	2.72943	2.51544	3.25807	2.8465	3.05031	3.00121	2.74867	2.95903	2.79763	3.26335	3.56767	2.08781	3.46434	3.22206	-0.0783048	2.97632	-0.557436	0.581229	0.736223	-6.20682
CDH2	4.61256	4.17591	4.21462	4.00982	3.94929	4.32998	4.33839	3.70977	2.99965	3.37896	3.91799	3.69388	3.98452	4.1914	4.16074	4.2552	4.47207	3.96332	3.99524	4.07084	4.50718	4.19649	3.76926	4.42148	4.05218	4.11555	3.38393	4.27259	4.26861	-0.0615024	4.04867	-0.460981	0.648027	0.784219	-6.25561
CDH5	3.29927	3.14449	3.16018	2.74149	2.62923	3.28215	2.91497	2.70391	2.75415	2.86579	2.64032	3.26443	2.31589	3.04416	3.12094	2.96577	2.79924	2.77049	3.5521	2.88186	2.98318	3.50718	3.51852	2.8839	3.68255	3.54842	2.60249	3.32713	2.78107	-0.249533	3.02363	-2.07364	0.0465015	0.15184	-4.34803
CDIPT	3.89415	3.92338	4.27259	4.21664	4.19377	4.09415	3.94185	3.24429	3.68157	3.77023	3.61294	3.82665	3.48746	4.27863	4.03691	3.99185	4.09023	4.06503	3.97812	4.15645	4.01759	3.83013	4.54598	3.97708	3.42685	3.53617	4.37918	3.50825	3.72008	-0.013275	3.92063	-0.114595	0.909504	0.951636	-6.35513
CDK12	2.18946	2.12259	2.12063	2.2312	2.08358	2.15425	2.11478	1.97618	2.23728	2.26288	2.09387	1.94184	2.45256	2.49983	2.33532	2.72089	2.35012	2.13778	2.17035	2.12801	1.88081	1.87062	2.34402	1.86389	2.28332	2.22222	2.21939	2.26422	2.22876	0.0942146	2.18968	1.24886	0.221055	0.411517	-5.59982
CDK13	2.38988	2.43993	2.33602	2.34551	2.27218	2.44917	2.31194	2.50309	2.55465	2.34802	2.73922	2.30716	2.36608	2.34708	2.4353	2.43775	2.33602	2.19153	2.40273	2.4283	2.33446	2.41058	1.82788	2.68983	2.43885	2.26506	2.75347	2.67939	2.57146	-0.00912805	2.41078	-0.122066	0.903634	0.948693	-6.35425
CDK14	2.98888	2.78444	3.1773	3.47435	3.49009	3.41976	3.32873	3.30808	3.03014	3.39316	2.96115	2.63707	3.16946	3.18608	3.12066	2.58968	4.12491	3.00292	3.53617	3.49223	2.49393	2.76698	2.47197	3.36384	3.33374	2.73824	3.48947	3.03742	2.71744	0.150261	3.12511	1.08747	0.285204	0.483437	-5.78052
CDK16	3.69311	3.35546	3.15369	3.40917	2.93327	3.3662	3.37771	3.06165	3.15467	3.13872	3.25393	3.43672	2.93577	3.10049	3.10172	3.29009	3.29962	3.4684	3.55479	3.48746	3.50046	3.62913	3.41776	3.07769	3.29316	3.78684	3.48792	3.40311	3.32366	-0.213591	3.32732	-2.81214	0.00845722	0.0510711	-2.84477
CDK17	3.076	2.92984	3.18809	2.84582	2.96428	3.06588	2.85225	3.02657	3.09505	3.08712	3.17103	3.15301	2.35811	2.3141	2.72727	2.63555	2.43885	2.89798	3.02373	2.97271	2.56924	3.12838	2.92083	2.64618	3.62913	3.80742	2.51698	3.58938	2.45445	-0.134869	2.93397	-1.00974	0.320428	0.519874	-5.85932
CDK19	2.3368	2.58182	2.58944	2.63637	2.87615	2.82478	2.90563	3.34657	3.01181	3.11479	3.09691	2.67406	2.70337	2.3448	2.5135	2.69991	2.52662	2.34174	2.62977	2.62057	2.21808	1.86962	2.05706	2.58878	2.48695	1.7148	2.42239	2.52041	2.74725	0.400509	2.58623	3.59844	0.00109834	0.0149309	-0.970448
CDK2AP2	2.93126	3.17817	3.11512	2.6949	2.45196	3.10481	2.95926	2.60872	2.46199	2.52874	2.69302	2.89326	2.56481	3.0667	2.37797	2.97484	3.26812	2.94132	2.46233	2.96604	2.84402	3.04053	3.03554	2.43601	3.40731	3.20732	2.71186	3.10136	3.00545	-0.113824	2.8632	-1.06525	0.29498	0.493429	-5.8036
CDK4	3.34811	3.09257	3.0874	3.23108	3.05997	3.09449	2.91922	2.56402	2.4905	2.25763	2.53971	2.86465	3.12687	3.58542	3.10288	3.60999	3.26266	3.02565	2.98581	2.6611	3.20184	2.852	3.86246	3.31929	2.73768	2.90248	2.87047	2.63974	2.80945	0.0249549	3.00363	0.188214	0.851935	0.919738	-6.34397
CDK5RAP3	2.73897	2.85384	2.95722	3.1792	3.06055	3.14366	3.02621	3.23244	3.37896	3.20958	2.75022	2.65682	3.56095	3.30629	3.5316	3.26812	2.7902	2.90683	3.11167	3.08184	2.66161	2.82811	2.78505	2.75789	2.43012	2.67939	2.72062	2.46888	2.7087	0.335027	2.95812	3.50751	0.00140317	0.0168165	-1.19786
CDK8	1.93699	2.26506	2.04512	2.06085	2.78999	2.11624	2.14746	1.75429	2.00892	2.0337	2.4579	2.06588	2.52289	2.20578	2.35998	2.47715	2.29893	1.63552	1.68321	1.60646	1.85091	2.09551	2.24251	2.88316	2.62341	2.11038	1.7873	1.71781	1.97058	0.191425	2.12944	1.60016	0.119696	0.281213	-5.13045
CDKN1A	3.88227	3.42233	3.85185	3.71475	3.44803	3.49544	3.87477	1.64749	2.718	3.49328	2.64808	2.17944	3.63707	4.70878	4.1705	3.46434	3.56095	3.39922	3.05922	3.87477	3.721	3.17249	3.75791	2.50804	4.58054	4.09415	2.69706	4.4309	3.48493	-0.158114	3.47233	-0.633365	0.531136	0.698573	-6.16204
CDKN1B	3.50271	3.27801	3.59559	3.23577	3.45452	3.36578	3.45658	3.65757	3.58865	3.5179	3.49931	3.26154	3.43028	3.22341	3.49931	3.40609	3.44357	3.44265	3.2612	3.1233	3.0584	2.57247	2.7352	3.6497	3.05561	2.1585	3.22081	2.25326	3.15398	0.462514	3.24489	4.04014	0.000326238	0.00729088	0.163185
CDKN2C	1.82788	2.43327	2.15227	2.20757	2.38333	2.14983	2.18105	1.80992	2.2	2.49188	2.06085	2.18573	2.39317	2.54395	2.15032	1.92773	2.80822	2.58737	2.27396	2.27557	2.22516	2.05345	2.61281	2.69302	2.5916	1.83053	2.9422	1.62529	2.834	-0.148925	2.29144	-1.23628	0.225632	0.415806	-5.61473
CDO1	2.78785	2.39353	2.78945	3.25588	3.36117	2.90592	2.90414	3.68157	4.19908	4.30238	3.57731	3.08514	4.14704	2.11817	3.16199	2.55938	2.86345	3.54728	3.75791	3.38184	3.34239	2.48236	2.08719	2.23562	2.29893	1.86655	4.16806	3.2476	2.78999	0.248158	3.07928	1.02879	0.311532	0.511223	-5.84051
CDS2	3.11261	2.87422	3.00234	3.15675	3.2458	3.08795	2.95282	3.2532	2.98072	3.12291	3.22142	3.5534	2.6977	3.0305	2.54584	2.83323	2.75817	3.33968	2.95342	3.42146	3.30152	3.24635	3.12977	3.22471	3.12649	3.25432	2.98747	3.12779	3.10829	-0.159839	3.09141	-1.96133	0.058867	0.179313	-4.54797
CDYL	2.95282	3.08133	2.99169	3.32169	3.46182	3.00596	3.35008	2.92888	3.10259	3.06727	3.04721	3.26369	3.02396	3.03256	2.8158	3.06474	2.93867	3.01657	2.93491	3.12619	3.0286	3.04451	2.77958	3.26197	3.10714	2.6955	3.15525	3.24189	3.18139	0.0375459	3.0698	0.529347	0.600331	0.749452	-6.22196
CEACAM1	2.6044	1.99778	2.21241	2.4606	2.11817	2.38527	2.35223	2.59647	2.62087	1.24131	2.42661	2.42874	1.74091	1.83269	2.43044	1.88186	1.42906	2.72546	2.45583	2.51378	2.62923	2.40589	2.50529	2.53971	4.23223	3.2855	2.39387	3.9167	2.28033	-0.661309	2.43599	-3.54957	0.00125318	0.0158575	-1.09297
CEBPG	2.19537	2.22649	2.22924	2.30839	1.777	1.89914	1.76998	1.84451	1.84451	2.183	2.03566	2.10003	1.91639	2.19267	1.79698	1.61804	2.26047	1.90144	2.17682	1.89323	2.18573	2.47107	2.25478	1.89434	2.69991	2.91922	2.3877	2.89517	2.59835	-0.344839	2.15433	-3.19063	0.00324052	0.028536	-1.97051
CEBPZ	2.20972	2.53315	2.61379	2.43465	2.48957	2.39353	2.28105	2.25379	2.23506	2.35715	2.56798	2.63114	2.14012	2.56148	2.073	2.33891	2.45722	2.30839	2.40589	2.76293	2.20108	2.72999	2.72279	2.51911	3.09954	2.91611	2.25997	2.66901	2.55042	-0.208889	2.47299	-2.45207	0.0200286	0.0890837	-3.61559
CELF1	3.23849	3.46904	3.2339	3.24466	3.41368	3.40567	3.17289	3.36198	3.32911	3.22206	3.47906	3.12291	2.57808	2.97902	2.79845	3.37979	3.02991	3.1332	3.20791	2.93714	3.31627	3.24507	2.72427	2.78533	3.7234	3.24904	3.12066	3.50718	3.26443	0.0189613	3.19561	0.192308	0.848754	0.917394	-6.34319
CELF2	3.68957	3.58607	3.43913	3.26303	3.29437	3.1549	3.22498	3.16331	3.25705	3.24935	3.18106	3.41874	2.92718	2.98747	3.12977	3.04661	2.99348	3.12977	3.16592	3.09563	3.3313	3.05746	3.14207	3.71073	3.05691	3.03742	3.28024	3.39367	3.13776	0.0240795	3.22569	0.30033	0.765929	0.862757	-6.31659
CELSR2	2.7084	2.41627	2.17634	2.66975	2.41201	2.41789	2.73493	2.2043	1.62157	1.84342	1.40386	2.19323	2.91898	2.67008	2.57926	2.13595	2.90391	2.72574	2.68279	2.49915	2.82975	2.5141	2.96887	2.99036	2.79924	2.50869	4.10258	2.68046	3.192	-0.520941	2.5691	-3.3039	0.00241027	0.0235814	-1.69815
CENPA	2.03804	2.67525	2.28033	2.17091	1.58519	2.06277	2.00729	3.48704	3.00857	3.41508	0.58514	4.91185	2.68019	3.65757	4.35968	3.16946	2.91762	1.82172	1.71637	1.86203	2.15532	2.32222	1.78848	2.12141	0.502529	1.68321	1.06527	0.710733	2.78785	1.05398	2.32928	3.27522	0.00259876	0.0247313	-1.76753
CENPB	2.85544	2.74967	2.44451	2.58713	2.13404	2.59742	2.74725	1.35974	1.74907	2.14928	1.85386	2.22516	2.83165	3.73417	2.99651	2.852	3.30076	2.82862	2.57247	2.87339	2.49021	2.84787	3.58807	3.06811	2.46572	2.57546	2.85297	2.68489	2.4664	-0.23691	2.6373	-1.32867	0.193645	0.378487	-5.50215
CENPC	2.30675	2.3958	2.22268	2.51544	2.21564	2.35998	2.48762	2.84529	2.94277	2.96991	2.99721	2.30159	2.38988	2.41166	2.28157	2.61163	2.70248	2.073	2.36608	2.35511	2.11817	2.19729	1.83386	2.88902	2.15569	1.99616	2.4353	1.78514	2.05133	0.338923	2.38669	3.20725	0.00310354	0.0278558	-1.93083
CENPQ	1.55958	1.55228	1.58519	1.35974	1.88862	1.48925	1.60403	1.74907	1.62722	1.56199	1.7799	2.21082	1.47615	1.93699	1.49805	1.68161	1.919	1.53946	1.43957	1.6861	1.6719	1.49528	1.99082	2.41233	2.08719	1.74762	2.23259	1.72543	2.20917	-0.177858	1.74886	-1.77683	0.0854006	0.228101	-4.85746
CENPU	1.81845	1.53409	1.79831	2.0331	2.01724	2.23461	1.84759	3.50333	2.87889	3.39232	3.07769	1.98134	2.5141	2.55042	2.7959	2.49292	2.11225	2.6057	1.55404	2.02642	2.1372	1.88543	2.41818	2.82452	1.26611	1.97759	1.35974	1.12602	1.22521	0.520027	2.17202	2.52339	0.0169586	0.0793098	-3.46822
CEP104	2.19941	2.50238	2.29212	2.09456	2.36689	2.19204	2.22799	2.07712	2.29355	2.29047	2.18637	2.55176	2.22122	2.24728	2.1852	2.19678	2.04906	2.24992	2.24792	2.3088	2.22924	2.42045	2.23562	2.50995	2.45755	2.40273	2.94515	2.65907	2.58127	-0.191766	2.32489	-2.70367	0.0110272	0.0594075	-3.08379
CEP112	1.51524	1.46924	1.56199	1.42176	1.75429	1.79831	1.54451	1.5367	1.55404	1.6425	1.50666	1.7873	1.64749	1.74667	1.32084	1.11454	1.90016	1.79583	1.84451	1.70858	1.50931	1.61011	1.8088	2.34319	2.52452	2.0809	2.42088	2.5097	2.59476	-0.48481	1.77839	-4.42245	0.000111341	0.00388424	1.17367
CEP170	2.55465	2.58013	2.76698	2.3665	2.7369	2.73768	2.13652	3.02204	2.72832	2.62638	2.48695	2.92198	2.58182	2.68046	2.46538	2.74028	2.83849	2.88438	3.11943	2.50408	2.66924	2.7702	2.7087	3.0667	3.04576	2.17142	2.2321	2.58713	2.76293	-0.0647919	2.67219	-0.669701	0.508001	0.682635	-6.13865
CEP290	2.10508	2.19774	2.30379	2.17419	2.33808	2.26325	2.12194	2.66619	2.53971	2.63667	2.84049	2.35459	2.36838	2.41712	2.46926	2.53276	2.53099	2.30923	2.22876	2.20478	2.2	2.19102	2.40146	2.62362	1.96576	2.06455	1.90754	1.87273	2.11421	0.229906	2.30841	2.79734	0.00877133	0.0521024	-2.87771
CEP350	2.51378	2.49393	2.5014	2.56635	2.87795	2.6331	2.5475	2.74807	2.90145	2.98175	3.12868	2.74807	2.41524	2.3837	2.52112	2.59709	2.6649	2.36109	2.48069	2.48863	2.35547	2.21939	1.67012	2.82478	2.45015	2.41818	2.47968	2.4562	2.57628	0.261853	2.55189	2.87333	0.00726684	0.0465391	-2.70751
CEP57	2.23373	2.38804	2.33137	2.08358	2.24625	2.19678	2.19537	2.53166	2.10386	2.27821	2.20375	2.34249	2.50596	2.57546	2.2766	2.44451	2.39211	2.22974	2.34802	2.16758	2.22557	2.6097	2.62923	2.7492	2.38184	2.10776	2.58713	1.83511	2.41094	-0.043304	2.33143	-0.542471	0.591369	0.742644	-6.21498
CEP63	2.43292	2.86926	2.55996	2.72354	2.67665	2.62341	2.60837	2.28564	2.58968	2.38835	2.6075	2.82298	2.55966	2.98175	2.54328	2.7369	2.89402	2.75553	2.7808	2.7518	2.65518	2.834	2.75712	2.85605	2.76349	2.52904	3.18213	2.52797	2.7969	-0.12443	2.69289	-1.70541	0.0981102	0.248604	-4.97066
CEP70	2.44024	2.17531	2.42944	2.53587	2.30923	2.63033	2.27122	1.63552	1.94991	2.06965	2.18001	2.57899	2.28477	2.27396	2.65789	2.00483	2.52629	2.64316	2.28431	2.84275	2.42126	2.39946	2.74947	2.7902	3.03151	2.50941	3.18809	2.74552	2.88109	-0.415806	2.46344	-4.05755	0.00031078	0.0070343	0.208701
CEP76	1.6549	1.9426	1.69493	1.66325	1.59332	1.50931	1.59589	1.89619	1.67012	1.6861	1.74667	1.69984	1.96835	1.75125	1.80763	1.90144	1.82289	1.40386	1.57592	1.43957	1.53409	1.64419	1.773	2.29002	2.27259	1.89619	1.96476	2.18573	1.9567	-0.0865987	1.77729	-0.98789	0.330847	0.529841	-5.88049
CEP83	1.74526	2.34968	1.88951	2.45652	2.35921	2.26937	2.56232	2.06341	2.28957	1.63552	2.80839	2.27865	2.24483	2.13892	2.39064	2.62504	2.48129	2.183	2.09687	2.56083	2.06898	2.36838	2.00954	2.62189	2.43186	2.54925	3.09206	2.35811	1.96756	-0.089136	2.30677	-0.767168	0.44878	0.635652	-6.06967
CEPT1	2.65652	2.75096	2.92361	2.7352	2.7098	2.76776	2.88777	3.29155	3.17012	2.90492	2.99941	2.98386	2.97681	2.62057	2.69061	2.92641	2.37649	2.85175	2.98721	2.45331	2.85985	2.68411	2.59136	2.96911	2.66567	2.3837	2.37837	2.73077	2.84275	0.145605	2.78518	1.71898	0.0955805	0.24481	-4.94945
CERK	3.09292	3.55479	3.55918	3.42989	3.07263	3.42407	3.60657	2.63393	2.60906	2.81037	2.88569	2.88681	3.34657	4.17895	3.21291	4.1705	2.96853	3.11638	3.14079	3.1773	3.09563	3.71379	3.7511	2.86549	3.54224	2.96381	3.23577	2.87264	3.62463	0.00307707	3.2601	0.0205198	0.98376	0.989653	-6.3615
CERS6	3.47344	3.2814	3.47623	3.2867	3.32499	3.24397	3.62819	2.93867	3.00912	3.25905	3.38696	3.05948	3.08965	3.28754	3.23108	3.19598	3.45923	3.23707	2.96517	3.66506	3.42092	3.25082	2.96936	2.91411	3.59211	2.83347	3.61294	3.36946	3.78556	-0.0288838	3.28441	-0.301793	0.764823	0.862046	-6.31615
CES1	2.69172	3.07546	2.90337	3.117	2.87237	3.24834	3.39496	3.05469	3.36198	3.08629	3.93459	3.30808	2.91841	2.64503	2.46199	3.64371	2.79297	2.6409	3.24189	3.018	3.43727	2.69195	2.86549	1.75958	2.13778	3.46182	4.13372	2.61674	2.99991	0.171791	3.01779	0.969408	0.339837	0.53792	-5.89805
CETN2	2.83263	2.96356	3.02002	2.7881	3.48108	2.75928	2.84449	2.89402	2.73254	2.80945	3.13712	3.08767	2.53667	2.90763	2.34319	3.12175	2.89748	2.60998	2.77268	2.57784	2.53349	2.74967	2.86124	2.97349	2.711	2.93043	2.7447	2.33352	2.90414	0.166388	2.82272	1.88417	0.0689409	0.198592	-4.68034
CETN3	2.11751	2.74494	2.5746	2.55232	3.03119	2.50557	2.36109	2.92665	2.65706	3.02505	3.24935	3.4284	2.13289	2.55176	1.9932	2.14983	2.7445	2.40964	2.77445	2.30961	2.43465	2.14012	2.34968	2.75347	1.96411	2.51698	2.70071	1.75958	2.91329	0.213256	2.54387	1.51668	0.139468	0.308779	-5.25107
CFAP298	2.8629	3.39496	2.95533	3.08795	3.21859	3.0874	3.08353	3.0667	2.96162	2.95367	3.26961	2.98663	2.78835	2.93867	2.86653	2.96298	3.3412	2.72786	2.6	2.73469	2.96936	2.99915	2.90512	2.85922	2.8362	2.84505	2.73363	2.71081	2.9526	0.225819	2.95518	3.43663	0.00169603	0.0186045	-1.37348
CFAP44	1.80763	1.76844	1.53101	1.54965	1.7119	1.53409	1.70699	2.1698	2.48827	2.19635	1.73353	1.45315	2.41627	2.18903	2.03435	2.78593	2.12801	1.84134	1.75555	1.81605	1.753	1.70532	1.27247	2.24666	1.68477	1.71025	2.1396	2.0723	1.66524	0.147988	1.89196	1.18415	0.245343	0.439985	-5.67501
CFD	2.34887	2.93261	3.91127	3.44848	2.86345	3.23817	3.7948	3.82154	3.55675	3.08576	2.18573	2.27218	4.05391	3.4603	2.59043	2.85711	3.53037	4.27259	5.23293	3.30299	3.47623	1.86203	3.43596	3.66688	3.3589	3.53095	3.5179	3.78469	2.8269	-0.348784	3.31795	-1.43806	0.160425	0.33763	-5.35958
CFDP1	2.35669	2.7492	2.36881	2.50804	2.67036	2.79845	2.52874	2.5106	2.69877	2.47933	2.62421	2.37317	2.75843	2.54683	2.68579	2.3141	2.67465	2.20972	2.82117	2.27259	2.07037	2.31748	2.56987	2.80764	2.65876	2.4149	2.391	2.30504	2.40494	0.130465	2.51344	1.69878	0.099367	0.250276	-4.98098
CFI	2.12	1.98361	2.51164	2.14424	2.00954	2.56798	2.09504	2.98038	2.99141	3.09141	1.4923	2.59933	3.18307	2.42519	2.56175	2.24148	2.48661	2.82616	2.99221	2.31146	2.68892	3.21324	2.76349	1.9769	2.71241	2.78135	1.77551	2.65733	2.54683	-0.163524	2.50796	-1.03962	0.30655	0.506244	-5.82967
CFLAR	3.43784	2.852	3.36875	3.35045	2.72999	3.10773	3.66412	3.11943	3.21367	3.33887	3.42276	3.18579	3.18393	3.16687	3.16399	3.09787	2.87101	3.22834	3.0286	3.37535	3.46735	3.11973	2.80505	3.19874	2.86124	3.48947	3.11452	3.34523	2.81649	0.0384748	3.17673	0.421473	0.676315	0.804877	-6.27297
CGRRF1	2.73873	3.0072	2.75533	2.87128	2.78058	2.46538	2.79485	2.22268	2.50631	2.49115	2.26193	2.71432	2.62809	2.92665	2.42045	2.2553	2.53223	2.63114	2.39317	2.7925	2.72399	2.74897	2.97349	2.7047	3.00945	2.89798	3.31385	2.89402	3.22803	-0.249129	2.71323	-2.64411	0.0127313	0.065556	-3.21262
CHCHD2	3.94494	4.32998	4.22356	4.51149	4.40466	4.26345	4.30665	4.092	4.05218	4.14704	4.12916	4.33839	3.41776	3.83013	3.5145	3.56635	3.6497	4.28937	4.22906	4.31263	4.13372	4.28642	3.87037	4.29291	4.17895	4.35968	4.21224	4.23223	4.17895	-0.172245	4.11374	-1.68551	0.101922	0.253909	-5.00152
CHCHD3	3.68255	3.77142	3.80742	3.41229	3.40731	3.71186	3.28451	2.69579	3.34282	3.04075	3.35288	3.83013	2.77445	3.81183	3.37157	3.38887	3.12002	3.81552	3.43268	3.77251	3.60195	3.67372	3.72421	3.83013	3.42233	3.32995	3.48108	3.84228	3.99684	-0.259887	3.50792	-2.32598	0.0267252	0.106763	-3.86917
CHD1	2.2495	2.04378	2.40825	2.28332	1.9769	2.34887	2.10968	2.50804	2.67439	2.15569	2.34514	2.20478	1.6549	2.3505	2.4188	2.53587	2.36732	2.16391	2.75237	1.96756	2.25679	2.69112	2.1852	2.06402	3.10413	2.87591	2.04761	2.85272	2.04684	-0.144658	2.33255	-1.2282	0.228606	0.419174	-5.62422
CHD1L	2.97742	2.92665	2.8156	2.7987	2.98467	2.87843	2.89086	3.04602	2.9663	2.94728	3.07653	2.66543	2.60055	2.56083	2.30961	2.5498	2.4606	2.75096	2.88316	2.66052	2.9718	2.63791	2.89351	3.07177	2.8042	3.1713	2.80977	3.18393	2.88438	-0.102114	2.83374	-1.2423	0.223432	0.413149	-5.60761
CHD7	2.64316	3.30114	2.98836	2.77928	2.57957	2.99116	2.76585	2.65996	2.9318	2.64446	3.13896	3.16468	2.29986	2.71898	2.44617	2.59043	2.63974	2.68612	3.01718	2.76526	2.57485	3.01688	2.55599	2.84707	3.70248	3.14026	2.60309	3.11544	2.76776	-0.117979	2.83021	-1.07482	0.290743	0.489781	-5.79372
CHD8	3.26402	3.39922	3.38184	3.16441	3.45097	3.49009	3.36664	3.42644	3.27918	3.30188	3.05901	3.10885	3.44642	3.32555	3.46785	3.68404	3.47435	3.25549	3.28451	3.2089	3.30188	3.4684	3.07343	3.34766	3.08938	2.97987	3.09636	2.92641	2.98947	0.189799	3.27974	2.81004	0.00850104	0.0511657	-2.84944
CHD9	2.2774	2.52535	2.3925	2.47227	2.52904	2.35268	2.45403	2.19537	2.63393	2.3505	2.17902	2.13595	2.6649	2.5673	2.54205	2.69061	2.85124	2.27396	2.35268	2.5135	2.29843	2.15569	2.33565	2.66329	2.40231	2.37079	2.30716	2.62897	2.39387	0.0682981	2.43139	0.935914	0.356544	0.55313	-5.92909
CHEK1	1.53409	1.54253	1.49528	1.62157	1.57163	1.49528	1.5807	2.04574	2.25272	1.87736	2.13833	1.75013	1.86389	1.35654	1.86655	1.42497	1.75429	1.62529	1.58519	1.62371	1.75125	1.56931	1.71025	1.89323	1.6681	1.76998	1.82289	3.31349	1.9932	-0.144514	1.77577	-1.08683	0.285482	0.483758	-5.78119
CHERP	3.06785	3.25773	3.08042	2.5109	2.84913	2.85491	2.89854	2.59742	2.78835	2.56083	2.80764	2.45366	3.38887	3.10234	3.16266	3.1454	3.08629	2.90145	3.00596	2.72331	3.06935	2.98836	3.01499	3.09357	3.0855	2.79845	2.61196	2.85745	2.71432	0.0130202	2.91302	0.143047	0.887178	0.938407	-6.35146
CHFR	2.95846	2.79819	2.84129	2.92302	2.54295	2.59369	2.81466	3.13685	3.25549	2.95449	3.17817	2.77318	2.89305	2.4093	2.57546	2.68744	2.34133	2.5997	2.6955	2.40273	2.97681	2.86152	2.44154	2.39064	2.90248	2.66833	2.63206	3.0587	2.82036	0.100332	2.76301	1.06632	0.294506	0.49334	-5.8025
CHGB	2.46277	2.39171	2.54925	2.45962	2.16758	2.05486	2.85297	1.95181	1.46924	2.37281	2.49809	1.32983	2.61759	2.36032	1.62371	1.84657	2.30207	2.77851	2.01963	2.63006	2.92435	2.47653	2.32306	2.55135	2.35998	4.59827	4.70878	3.29391	2.39824	-0.727136	2.49564	-3.16339	0.00347771	0.0299116	-2.03534
CHI3L1	1.55228	1.78848	1.38329	1.753	1.54451	1.71637	1.61804	5.61375	2.47681	4.66043	2.21766	-0.909001	1.9153	1.6289	2.27078	5.46315	0.966551	3.08965	1.88186	1.4923	2.22322	1.74667	1.93045	0.412194	0.65695	3.45452	3.00668	4.92512	0.266263	0.124823	2.16366	0.23182	0.818199	0.898076	-6.33481
CHL1	1.5367	1.80369	1.66524	1.4116	1.95847	1.54965	2.94187	2.50111	3.12687	2.24349	1.12602	1.60646	2.15164	2.03663	1.56199	1.54451	1.85701	2.59332	2.30675	2.87315	1.88307	1.47945	1.87175	1.92872	2.85922	3.22977	4.12238	2.46511	1.53409	-0.509902	2.12999	-2.22775	0.0332827	0.121155	-4.06026
CHMP1B	3.49643	3.05809	3.22771	3.32099	3.02744	3.18503	3.23671	2.89979	3.27773	2.84505	2.95394	3.07291	2.53036	2.91497	2.67195	2.68256	3.00489	3.2612	3.12977	3.1549	3.56371	3.39187	3.17249	2.56304	3.93768	4.92512	2.97462	3.73052	3.00622	-0.377015	3.17992	-2.41088	0.0220258	0.0944062	-3.69943
CHMP2B	2.95425	2.90734	2.53885	2.47968	2.75736	2.52229	2.58013	2.44154	2.70897	2.33639	2.9962	2.97349	2.20159	2.73155	2.51308	2.39064	2.6639	2.54009	2.51236	2.34044	2.68612	2.84216	2.90869	2.82558	2.76437	2.96273	2.36838	2.78003	2.54641	-0.0438613	2.6474	-0.501601	0.619489	0.764443	-6.23617
CHMP5	2.72969	3.22524	2.778	2.87541	3.38887	2.81202	2.57926	2.96604	2.88316	3.04629	3.10481	3.11793	2.71296	2.91874	2.73283	2.67222	2.98608	3.15057	2.55434	2.72601	2.74661	2.66295	2.81898	2.59647	2.57517	2.70897	2.84349	2.61644	3.04485	0.159767	2.84739	1.98001	0.0566297	0.174001	-4.5153
CHMP7	2.41058	2.67195	2.71853	2.65706	2.54641	2.55852	2.8863	2.1692	1.77551	2.08419	2.05345	2.55966	3.011	3.0083	2.94758	3.0587	2.92542	2.7902	2.68224	2.82862	2.96963	2.86902	3.23148	3.01745	2.99297	2.33137	3.00461	2.76139	2.92862	-0.276575	2.70517	-2.28511	0.0292968	0.112023	-3.94938
CHN1	3.43452	3.30337	3.011	3.0587	3.422	3.14511	2.84582	3.25281	3.50097	3.38027	3.16723	3.51739	2.90898	3.02505	2.97462	2.65084	3.0757	2.7362	2.79535	2.8163	2.71642	3.12564	2.75843	3.36009	2.56339	2.53276	1.97855	2.59678	3.89977	0.334009	3.01911	2.54368	0.0161681	0.0767317	-3.42581
CHN2	3.0072	3.15587	2.61825	2.60192	2.57397	2.67525	2.75465	2.1635	3.04275	2.76725	2.50467	3.36532	3.09929	2.30839	3.1227	2.54128	2.80764	2.94594	2.05133	2.90492	2.58244	3.06387	2.51129	3.6143	1.83053	2.62057	2.85248	2.53413	3.35158	0.0325562	2.7577	0.221001	0.826539	0.901965	-6.33726
CHORDC1	2.73998	2.90414	3.23276	2.12259	2.52229	2.72627	2.53382	2.82587	2.80714	2.39686	3.13627	2.97247	2.37959	2.21406	2.27122	2.15794	2.51973	2.82838	2.90898	2.64618	2.32673	2.42558	2.25422	2.64675	3.26004	2.71927	2.47427	3.05198	3.3835	-0.128352	2.66858	-1.00655	0.321935	0.521542	-5.86243
CHPF	3.45923	3.31929	3.48428	3.67372	3.25833	3.43727	3.87614	2.80152	2.86873	3.06195	3.07792	2.89927	3.09177	3.54153	2.85653	3.71475	3.70331	3.32013	2.94622	3.55405	3.67545	3.33516	4.27259	2.94325	3.02458	3.7322	3.67111	3.53781	3.13463	-0.127429	3.35423	-0.955583	0.346669	0.544309	-5.91099
CHRNA10	2.38483	2.30757	2.18573	2.16695	2.1129	2.09622	2.29312	2.37235	2.24828	2.37079	2.0063	2.01654	2.8042	1.85494	2.28033	2.9481	2.41269	2.39504	2.21241	2.50309	2.49943	2.36437	2.43427	1.90831	3.37031	2.92333	1.92511	2.58182	2.25845	-0.162006	2.35303	-1.32811	0.193827	0.378696	-5.50285
CHRNA6	2.58244	2.28105	2.14636	2.67439	2.391	2.43044	2.52904	2.8114	1.753	2.58127	2.96381	2.07097	3.39098	2.23259	2.02179	2.29127	1.99616	2.25095	2.41032	2.61196	2.43292	2.53382	2.56449	2.71983	2.88569	2.87467	2.10003	2.18862	3.10747	-0.136261	2.47685	-1.02005	0.315591	0.515553	-5.84918
CHRNE	2.59408	2.31146	2.33891	2.31623	2.26139	2.46826	2.52179	2.43846	3.12066	3.11943	2.88515	2.00237	2.12194	1.44669	1.45633	3.27853	1.2853	2.52729	2.42597	2.73185	2.40524	2.4704	2.91583	1.61599	3.39316	3.25669	6.19754	2.5106	1.25991	-0.458208	2.5406	-1.43878	0.160224	0.337606	-5.35862
CHST1	2.27953	1.94903	1.82411	2.28203	2.34551	2.18054	1.74091	2.09749	2.04837	2.59619	1.33432	2.7961	1.55228	1.46466	1.21651	1.76998	1.6289	1.9932	2.40667	2.26471	2.04129	2.28609	2.12259	2.19323	3.70079	3.18704	2.57546	3.64371	2.27523	-0.610061	2.19988	-3.30076	0.0024302	0.0235814	-1.70574
CHST10	3.0436	2.82009	2.72999	3.14424	2.91497	2.75605	2.78288	1.79447	3.19364	3.21367	3.6226	3.55273	2.86678	3.42499	2.84216	2.41994	3.12927	3.05412	2.80375	2.81602	2.71592	2.72227	2.66873	3.11973	2.33891	1.99842	2.91132	2.1818	3.27112	0.239161	2.85704	1.59519	0.120806	0.282458	-5.13779
CHST15	2.33041	2.39134	2.52145	2.82666	2.8626	2.75761	2.04129	3.69994	4.05739	3.54153	3.76716	3.02373	3.11638	1.97941	2.79429	3.15983	2.56449	3.018	2.93015	2.41094	2.85323	2.78885	2.62389	1.76681	2.71296	2.24625	1.919	2.5313	1.56931	0.460414	2.71746	2.32733	0.0266443	0.106577	-3.86651
CHST2	2.01963	1.75661	1.76844	1.94629	2.04574	2.21564	1.89725	2.36358	2.54584	2.51946	2.92384	1.38329	1.80763	2.23373	2.22122	1.88647	2.40792	2.49223	2.25228	2.2558	2.02106	2.14928	3.14868	1.38329	2.67691	2.96658	1.4186	2.86176	1.90754	-0.180232	2.18885	-1.08284	0.28722	0.485647	-5.78536
CIAO2B	3.40917	3.34282	3.41147	3.39825	3.52532	3.44265	3.57218	2.77209	2.34044	2.53478	2.53478	3.067	2.50437	3.66776	3.54896	3.41562	3.85996	3.39454	3.57791	3.60195	3.0763	3.82335	4.28371	3.30114	3.58865	3.63003	3.62603	3.73831	3.44997	-0.394071	3.35998	-2.64265	0.012776	0.0656621	-3.21576
CIAPIN1	3.05616	3.07313	3.067	2.87889	2.94054	3.16687	2.89927	2.55042	2.24483	2.73493	2.61056	3.15082	2.89351	3.13741	2.80375	3.05691	2.4948	3.02346	3.0057	3.0664	3.04752	3.28782	3.64726	2.95926	3.3295	3.29357	3.23957	3.15894	2.87975	-0.29334	2.98961	-3.13335	0.00375832	0.0311935	-2.1065
CIB2	3.06306	2.6057	3.05691	2.46972	2.63951	2.37235	3.22834	1.82411	1.51524	2.40349	3.48064	1.69654	2.7969	2.41524	3.89694	3.5123	4.33568	2.98663	2.58035	3.00747	2.96658	2.98547	3.08965	2.75415	2.57838	2.3448	4.51691	2.78029	2.06721	-0.105058	2.82657	-0.42159	0.676231	0.804877	-6.27292
CILP	2.7065	3.76716	3.67615	3.30114	3.51852	3.04629	3.09563	4.00183	5.04478	5.51918	3.26303	4.21005	5.17148	2.27078	3.48947	3.67286	4.092	2.88681	4.00982	3.09986	3.71637	3.67446	3.03317	2.6442	1.85701	1.75429	2.82298	2.25045	2.17419	0.928728	3.37139	3.21563	0.00303656	0.0276433	-1.91078
CINP	2.54205	2.56758	2.3198	2.7362	2.50804	2.28247	2.59043	2.34928	2.29522	1.90549	2.1698	2.45053	2.39824	2.66184	2.10319	2.19204	2.57517	2.40231	2.82249	2.70732	2.54543	2.68841	2.76068	2.72856	2.82975	2.94728	3.25833	2.75294	3.17954	-0.410897	2.56105	-4.64528	5.91e-05	0.00291249	1.77103
CISD1	3.74263	4.08808	3.8956	3.70503	3.66183	3.7322	3.66265	3.40684	3.21291	3.46904	3.60527	3.9671	2.99348	3.55608	3.32413	3.51061	3.5123	3.48015	3.53311	3.66412	3.75791	4.02082	3.65661	3.94185	3.72693	3.82335	3.55146	3.4827	3.65954	-0.100617	3.63256	-1.10278	0.2786	0.476091	-5.76436
CIZ1	2.22268	2.38254	2.1486	2.17035	2.21451	2.30207	2.50704	2.03506	2.1698	2.14123	1.95592	1.97469	2.372	2.83189	2.44751	2.72727	2.73791	2.17091	2.3101	2.46456	2.19267	2.31791	2.43465	2.76324	2.05201	2.28768	2.65935	2.27486	2.53971	-0.0581229	2.33823	-0.622971	0.537855	0.704795	-6.1685
CKAP2	2.00153	1.86203	2.34015	1.94184	2.3877	2.08504	1.78937	2.9702	1.58519	2.32222	2.72999	2.0865	1.98934	2.21939	2.18105	1.91321	1.89434	2.43803	1.88951	1.85494	2.09687	2.22649	2.01724	2.3975	1.91231	1.7873	2.92485	2.25727	2.75129	-0.0775614	2.16733	-0.601334	0.551986	0.715563	-6.18161
CKAP4	3.26197	3.38518	3.47159	3.14239	3.27737	3.22524	3.29047	3.27267	3.01551	3.02621	3.60744	3.59289	2.50736	2.51724	2.57723	2.76383	3.31349	2.84349	3.08107	3.05136	3.21207	3.28482	2.97322	2.92223	3.40517	3.34906	2.9435	3.19662	3.84228	-0.0431661	3.1501	-0.361121	0.720456	0.831988	-6.29651
CKAP5	3.10172	3.07122	3.18307	3.18284	3.02681	3.09844	3.24429	2.47968	2.61615	2.71592	2.67117	2.80208	3.17985	3.48064	3.18904	3.19851	3.23177	3.076	2.72684	2.94566	3.07546	3.13815	3.53838	3.28589	3.23276	2.24349	3.11224	2.42761	3.59428	-0.00522808	3.03	-0.0427178	0.9662	0.97931	-6.3608
CKB	3.4141	2.95641	3.57896	3.03432	1.56931	3.36946	3.88227	2.03125	1.88186	1.74667	2.14573	3.23633	3.87477	4.25237	3.27489	4.02575	3.7622	3.94057	4.02259	4.24965	3.32827	3.45658	4.24022	3.15587	3.49053	2.852	4.14474	3.64571	3.47344	-0.605703	3.31161	-2.34589	0.0255484	0.104179	-3.82975
CKLF	1.0296	0.983302	1.2853	1.77163	1.97234	1.33876	0.760648	3.06387	3.02031	2.94187	2.79946	2.78885	1.17074	0.837933	1.09082	1.00386	1.07701	1.80763	1.86094	1.34383	1.60403	1.5662	1.4153	1.48925	2.19836	2.09335	2.1656	1.89914	1.64594	-0.0553296	1.72503	-0.224327	0.823973	0.900457	-6.33652
CKM	5.79593	5.56279	5.79593	5.61375	5.61375	5.79593	5.86745	4.77837	4.8958	4.54598	4.573	5.86745	5.11991	5.94051	5.46315	5.26827	5.37873	6.10864	6.19754	6.10864	5.68045	5.94051	5.46315	5.46315	5.56279	5.26827	6.01864	5.26827	5.73277	-0.329892	5.54102	-2.17784	0.0371396	0.129989	-4.1551
CKMT2	5.56279	5.51918	6.01864	5.68045	5.73277	5.73277	5.61375	4.98887	4.87053	4.75658	5.17148	5.79593	4.82954	5.68045	5.09226	5.14564	5.30508	5.86745	5.86745	5.79593	5.86745	5.79593	5.23293	5.86745	5.26827	5.20097	5.09226	5.37873	5.56279	-0.184309	5.45842	-1.40139	0.17102	0.351119	-5.40848
CKS1B	1.88744	1.99994	1.81718	2.14288	2.25186	1.93699	1.58932	2.37398	2.27523	2.06277	1.99689	2.35669	1.96924	1.61599	1.85808	1.72667	1.72263	2.19426	2.3171	2.20375	1.62722	2.17726	2.20478	1.76844	2.44336	2.75071	2.76747	2.75022	2.19204	-0.307534	2.10277	-2.76617	0.0094692	0.0545254	-2.94676
CLASP1	3.62603	3.65501	3.76629	3.57842	3.15951	3.65757	3.59835	3.47103	3.44642	3.37633	3.54615	3.46326	3.11023	3.45038	3.3835	3.37847	3.6323	3.17876	3.51995	3.14897	3.31271	3.30736	2.80018	4.092	3.30076	2.57628	3.35455	2.75371	3.77251	0.228379	3.39369	2.0217	0.0519034	0.163716	-4.44155
CLASP2	2.68983	2.64219	2.9494	2.55501	2.7997	2.69652	2.8253	2.79562	2.64618	2.57045	3.05311	3.01822	2.57307	2.8362	2.7876	2.48733	2.8626	2.56857	2.67908	2.65876	2.85577	2.77976	2.42944	3.307	2.63419	2.26895	2.90091	2.40107	3.07313	0.0392025	2.73603	0.445672	0.658928	0.791867	-6.26252
CLCN3	2.99456	2.7321	3.41925	2.8476	2.95342	2.73444	3.21953	2.63707	2.47328	2.33808	2.26599	2.92963	2.94325	3.10829	2.75761	2.76611	2.99889	2.96245	3.35599	3.21029	3.05948	3.01919	2.70732	3.05285	3.76822	2.69906	3.32995	3.67041	3.85564	-0.393701	2.99345	-3.17286	0.00339344	0.0295152	-2.01284
CLCN5	2.20578	1.82544	1.54965	2.06898	1.93699	1.89323	1.88543	2.91497	2.59933	2.5475	2.93738	2.2321	1.96756	1.60819	1.72085	1.56403	1.33876	2.17241	1.84228	1.93516	2.02891	1.90926	1.69493	2.34633	2.44689	2.51609	1.6589	2.7876	1.84547	-0.0518508	2.06829	-0.334144	0.740519	0.843847	-6.30587
CLDN10	2.63927	2.12858	2.09129	2.60632	2.31748	2.54867	2.54166	2.65013	2.66802	2.85297	2.7397	2.08291	3.13846	2.5014	3.40731	2.31497	2.45998	2.67991	2.40384	2.59271	2.70248	2.59043	2.42414	2.31048	2.15164	1.93878	2.26557	2.72168	3.06334	0.0828644	2.53566	0.677469	0.503128	0.678092	-6.13349
CLEC1A	2.80018	2.07162	2.65876	2.70627	2.4366	2.84449	2.75736	3.23214	2.90848	3.25216	2.64284	2.91297	2.83323	2.20972	3.05365	2.7922	2.78593	2.9425	2.73791	2.8275	2.66543	2.551	2.31497	2.6869	3.23535	2.56607	2.0056	2.42239	2.39134	0.146493	2.69812	1.26202	0.216347	0.406666	-5.5841
CLEC2B	2.21604	1.9233	2.42661	2.79404	2.91762	2.4093	2.23506	2.8834	2.45652	3.12868	2.05706	1.75958	1.68771	2.62389	3.34859	2.00954	2.13112	2.53382	2.48661	2.351	2.05133	1.92511	2.90848	1.7119	2.64702	3.37847	1.33432	3.17985	2.75396	-0.0262505	2.4231	-0.137383	0.891616	0.941514	-6.35226
CLEC2D	0.11114	0.266263	-0.909001	-0.909001	0.11114	-0.909001	-0.185339	1.5807	1.61804	1.34755	1.2853	1.01621	1.0296	0.898405	1.1959	0.983302	1.10201	0.11114	0.11114	0.11114	-0.185339	0.266263	0.94637	1.32543	1.21651	1.07701	1.7799	1.10201	1.32084	-0.198542	0.648815	-0.709641	0.483225	0.663265	-6.11148
CLGN	2.85849	2.77049	3.00073	2.83796	2.82947	2.7979	3.46084	2.46605	2.30923	2.64808	2.31748	3.29891	3.06439	3.01499	2.78945	2.61993	3.42989	3.37068	4.29884	4.06888	3.03835	3.1062	3.09954	3.59008	3.50046	3.47764	3.63295	3.5467	3.59367	-0.673218	3.13235	-5.18628	1.26e-05	0.00115782	3.23508
CLIC1	2.92408	2.97322	2.74522	3.28635	3.46735	3.19851	3.08514	3.45815	2.9481	3.03918	2.73309	2.49188	3.33445	2.95669	3.00489	2.95184	3.02681	3.14113	3.30411	3.0747	2.92641	3.00646	3.42788	2.40751	3.40778	3.33887	2.98441	3.38742	2.54834	-0.0428232	3.05448	-0.394018	0.696263	0.816499	-6.28412
CLIC4	4.06888	2.94132	4.26064	3.08663	2.86653	3.39048	3.64315	2.89724	2.73643	2.87492	3.41229	2.97271	3.28245	3.41049	3.13373	3.56308	3.68255	3.10829	2.78362	3.40731	3.72228	4.30238	3.38568	3.56031	3.89841	3.35338	3.21891	3.57472	3.40352	-0.169301	3.37732	-1.11916	0.27166	0.469035	-5.74685
CLIC5	4.35968	4.36831	4.19377	3.91008	3.35158	3.73744	3.86659	3.20601	3.89977	3.50825	3.66265	3.88227	3.78319	4.13602	3.95577	3.77454	4.04093	4.23223	3.86659	3.77142	4.24022	4.24965	3.95191	4.02947	3.71906	4.02696	3.22703	3.70977	3.96884	-0.0551044	3.88379	-0.482267	0.633001	0.774456	-6.24563
CLINT1	3.4986	3.11081	3.34084	3.34282	3.08008	3.40111	3.30808	3.3572	3.20958	3.12235	3.3572	2.9898	3.04885	3.26083	2.98441	3.35288	3.4006	3.40161	3.22587	3.23467	3.25216	3.4469	2.87591	3.26042	3.21534	3.05412	3.6115	3.18704	3.06876	0.0088684	3.24139	0.123881	0.902208	0.947379	-6.35402
CLIP1	3.35122	3.15734	3.17157	2.92815	2.65544	2.98888	3.0305	2.78945	3.02142	2.94455	2.74058	2.76611	2.98199	2.99248	2.61644	2.79429	3.23743	3.37589	2.77976	3.11908	3.14957	3.43363	2.87315	2.70627	3.33721	3.11544	3.59763	3.5145	3.24163	-0.23593	3.04868	-2.53694	0.0164268	0.0776889	-3.43992
CLK1	2.92561	2.76262	2.94967	3.12473	3.07343	3.07263	3.36009	3.19702	3.23214	2.91437	2.61854	2.37884	3.26481	2.87446	2.8995	3.60527	2.75964	2.58653	2.32021	2.51482	2.57045	2.1155	2.0446	3.35198	2.13892	3.00596	2.34015	2.75488	2.40063	0.488734	2.79855	3.98189	0.000383639	0.00780779	0.0112991
CLK3	3.22803	2.76437	2.61434	3.45196	3.0664	2.99699	3.07836	3.755	3.48792	3.43503	3.33679	3.36117	2.27523	2.1155	2.00153	2.19102	2.24666	3.0747	2.80396	2.9369	3.14113	2.81085	2.2043	3.04851	3.65574	3.00622	3.39187	3.36532	3.33516	-0.158302	2.97176	-0.889515	0.380571	0.576794	-5.97039
CLK4	2.79146	2.79535	2.75465	3.00646	2.68863	2.99396	2.94594	3.10595	2.86526	2.77851	2.6955	2.44953	3.25244	2.73768	3.15082	2.92168	3.07059	2.46483	2.57146	2.65907	2.7997	2.11751	2.15734	3.33968	2.34849	2.1698	2.4704	2.37559	2.95669	0.346732	2.73914	3.3143	0.0023452	0.0232714	-1.67291
CLMN	2.42414	2.83165	2.6582	2.57838	2.71592	2.84372	2.62141	2.11478	2.78999	3.31113	2.40589	1.52643	2.74691	2.17837	3.08353	2.70337	2.47107	1.9216	2.57784	2.55072	2.43359	2.37765	2.2203	2.25679	2.99193	2.96029	2.66802	3.26674	2.46165	0.0312634	2.57559	0.21958	0.827636	0.902982	-6.33757
CLN8	1.91982	1.78937	1.75661	1.92424	1.80483	1.97543	1.74248	2.87422	2.80532	2.73922	2.5294	3.60195	0.412194	0.983302	0.760648	0.266263	1.24732	1.91808	1.90316	2.0056	1.88186	2.12858	1.51266	2.11682	3.23244	2.85464	2.10319	2.96517	2.80473	-0.454247	2.01929	-1.64378	0.110318	0.266531	-5.06526
CLOCK	3.422	2.84402	3.06876	3.42933	3.29285	3.36042	3.23928	2.89748	2.90592	2.8067	2.8275	3.10714	2.95342	3.21605	3.01657	3.02323	3.51061	3.23535	3.15301	3.48893	3.35673	3.09636	3.17103	3.52716	3.39232	2.82171	3.24935	3.44315	3.52829	-0.175599	3.18568	-2.02191	0.0518803	0.163716	-4.44117
CLP1	3.05227	2.79429	2.85711	2.99371	2.95394	2.93544	2.79562	2.26895	2.27038	2.84529	2.90337	2.89854	3.2974	3.20482	3.24362	2.80532	2.70792	2.97072	3.02828	2.85849	2.77445	2.79198	3.06114	2.95101	3.07733	2.95055	2.5313	2.96329	2.68165	-0.0144485	2.87821	-0.156372	0.876752	0.932137	-6.34946
CLPTM1	3.38742	3.22557	3.21029	3.16018	2.93788	3.25867	3.3	2.53099	2.23064	2.80071	2.25272	3.1805	3.25216	4.21664	3.18669	3.47159	2.98493	3.41508	3.38784	3.56767	3.39141	3.41724	4.28113	3.2303	3.05412	3.07263	3.47059	3.41643	3.19561	-0.314953	3.22371	-2.09365	0.0445563	0.147408	-4.31152
CLSTN1	2.89005	3.18965	3.30443	3.22834	3.39141	3.28176	3.4827	3.27654	2.96936	3.3004	3.02142	2.92485	3.36664	3.22834	3.27954	3.28245	3.78556	3.13815	2.83369	3.06055	3.56031	3.05444	3.13135	3.42499	2.77976	2.58325	3.3004	2.64219	2.93577	0.210189	3.16029	2.16719	0.0380129	0.132028	-4.17514
CLTA	2.87519	2.87264	2.92693	3.10014	3.13135	3.13373	2.84913	3.48064	3.00262	3.1923	3.11571	3.21814	2.99797	2.78107	2.8465	2.75208	2.70221	3.26547	3.14511	3.04001	2.82636	2.96115	3.08606	2.8362	3.00098	3.07706	2.74807	2.87998	2.78861	0.0274693	2.98736	0.364633	0.717859	0.830219	-6.29524
CLTB	3.87172	3.98813	3.74899	3.62112	3.71812	3.6526	3.79589	3.27884	3.62112	3.77454	3.81923	3.40917	2.85922	3.47392	3.15398	3.00379	3.36748	3.3295	3.54547	3.58281	3.45097	3.9167	3.33331	3.40731	3.64449	3.74807	4.14249	3.90128	3.68594	-0.101998	3.5809	-0.927617	0.360766	0.557612	-5.93662
CLTC	3.73052	3.69743	3.73831	3.81298	4.05058	3.753	3.59289	3.15951	3.42407	3.48428	3.41319	3.56697	3.97372	3.53311	3.56308	4.64457	3.82899	3.68594	3.8352	3.69388	3.75698	3.7611	3.48554	3.70708	3.64652	3.27189	3.18937	3.77351	3.33848	0.108496	3.65906	1.00855	0.320989	0.520343	-5.86048
CLU	3.23707	3.58807	2.73043	2.60024	3.39098	2.75264	2.6559	3.59559	3.49596	3.69994	2.82558	2.25845	3.95306	2.99561	3.27413	2.46751	3.02909	2.3421	2.72704	1.93045	3.28635	2.54954	2.80344	2.39387	1.91982	2.13778	2.75712	1.9932	3.13232	0.593438	2.84563	3.46971	0.00155268	0.0178247	-1.29171
CLUH	3.33641	3.5521	3.33407	3.59694	3.1784	3.6364	3.45397	2.82171	2.8489	2.84129	3.08434	3.7456	3.1846	3.96171	3.30629	3.78002	3.01202	3.5521	3.40212	3.70503	3.49643	3.78922	4.07727	4.06888	3.40609	3.10481	2.98038	3.44469	3.25045	-0.189314	3.41215	-1.48806	0.146828	0.319849	-5.29116
CMC2	3.65125	3.64371	3.72519	3.55975	3.10259	3.54783	3.35455	2.69845	3.04053	2.70496	3.05586	3.61785	2.97796	3.2814	3.13627	3.25965	3.35374	3.44907	3.4986	3.87037	3.51555	3.56154	3.79237	3.12977	3.75791	3.36117	4.26064	3.86246	3.87989	-0.384465	3.43624	-3.30045	0.00243223	0.0235814	-1.70651
CMPK1	3.35374	3.27605	3.39454	3.09357	3.53095	3.08606	3.23884	3.30896	3.34766	3.35045	3.38255	3.09871	2.96773	2.88462	2.86926	3.00691	3.02323	3.02291	3.20567	3.02346	2.7902	3.30076	2.76501	3.14366	3.21113	3.32413	2.90414	3.30518	2.99772	0.106217	3.1451	1.34531	0.188273	0.371035	-5.4811
CMTM6	2.40349	2.5226	2.57784	2.66619	3.397	2.70601	2.40273	3.41925	3.17985	3.10595	3.38656	2.62725	2.94758	2.4458	2.86678	3.08767	2.60161	2.67525	3.05412	2.32064	2.95101	2.59408	2.86602	2.65013	2.72305	2.55042	1.87273	2.5014	1.95264	0.284484	2.72606	2.15377	0.0391392	0.134484	-4.20029
CMTR1	3.34048	3.5067	3.52349	3.42315	3.55405	3.59835	3.44997	1.85606	1.30374	1.82544	1.59332	5.14564	1.37019	4.72833	4.7882	4.92512	4.53306	3.27737	3.47059	3.44172	3.6226	3.49643	2.25095	5.68045	4.35968	2.19153	2.51517	2.36224	6.19754	-0.250703	3.42523	-0.548521	0.58726	0.740253	-6.21171
CNBP	4.16074	4.48118	4.23753	4.00017	3.80742	4.092	3.96063	3.57791	3.91275	3.85455	3.70503	3.74647	3.71475	4.08555	3.67545	3.8252	3.79237	4.00183	3.99185	4.10868	4.26609	4.18938	3.7234	3.92627	4.05391	3.97041	3.93619	4.04866	4.19377	-0.114808	3.9669	-1.42539	0.164025	0.342374	-5.3766
CNIH1	3.38887	3.06935	3.34811	3.26042	3.40917	3.13347	3.28782	2.98386	3.06907	3.12354	3.01718	3.60744	3.10136	3.29155	3.12119	2.75442	2.99676	3.49009	3.2735	3.32499	3.14511	3.23633	3.2267	3.12564	3.15759	3.13463	3.56031	2.95903	3.57286	-0.0929032	3.21277	-1.17856	0.247531	0.442699	-5.68133
CNIH4	2.17837	2.61941	2.38035	2.54425	2.63504	1.72263	1.97618	2.1656	1.8905	2.1187	1.96924	2.0587	1.94629	1.99923	1.73353	1.93788	2.51636	1.9614	2.24099	2.32673	2.08719	2.06277	2.76262	2.12986	2.79716	2.7881	2.62057	2.87702	2.8243	-0.315838	2.27141	-2.66168	0.0122049	0.0640268	-3.17481
CNN3	3.06195	3.32413	3.50209	3.42499	2.79946	2.49512	3.12066	2.87752	2.91002	3.25183	3.00433	2.71404	3.23316	2.76611	2.90869	3.01202	2.87293	3.15148	3.01279	2.40553	3.09177	3.52829	3.21029	2.6245	3.66603	3.28823	2.7518	3.52216	2.62584	-0.0568087	3.03992	-0.466284	0.644269	0.781753	-6.25317
CNNM2	3.08042	2.69964	2.57838	2.90734	2.81536	2.64949	2.84787	2.32341	2.92918	2.0865	2.55297	2.33769	2.93234	2.84962	3.008	3.13526	4.20113	2.89574	2.8163	2.85628	2.86653	2.78107	2.73564	3.71537	2.96	2.20578	2.53757	2.52904	2.78444	0.0127014	2.81443	0.0837557	0.933789	0.963654	-6.3582
CNNM3	2.88028	2.58351	2.50704	2.54205	2.65847	2.56083	2.99889	3.20258	3.18071	3.05388	2.93261	2.99651	2.62556	2.43113	2.49613	2.49742	2.27358	2.51636	2.70193	2.7979	2.74106	2.31497	2.1759	2.4149	2.71081	2.40896	2.8269	2.87864	2.66856	0.134251	2.67511	1.35094	0.186484	0.368736	-5.47394
CNNM4	2.51544	2.75371	2.65847	2.65268	2.42479	2.55399	2.89883	2.32934	2.71081	2.76585	2.3887	3.58938	2.13174	2.39171	2.58152	1.89725	2.28726	2.64949	2.80449	3.02657	2.78885	2.74776	2.35223	2.7369	2.73849	2.28068	3.43672	3.59091	3.69218	-0.343097	2.70265	-2.34267	0.0257351	0.104415	-3.83612
CNOT1	3.02991	3.05031	3.17954	3.39875	3.23316	3.43028	3.16912	2.9614	2.92408	3.0123	3.24282	2.59301	4.51691	3.19393	3.31627	3.37589	3.54153	3.26632	3.25244	3.35673	3.26083	3.17075	3.02259	3.6808	3.1846	2.59933	2.98493	2.80208	2.74897	0.134382	3.18964	1.01535	0.317788	0.517902	-5.85381
CNOT2	2.70792	2.99066	2.69523	2.78662	3.09662	2.7434	2.57658	3.2241	2.65652	2.60931	2.60721	2.8168	2.61133	2.62869	3.04602	2.9022	2.95582	2.8232	2.81285	2.71215	2.5185	2.64779	2.6057	2.96517	2.64924	2.53004	2.63175	3.1057	2.49742	0.0949429	2.76395	1.22055	0.231449	0.422619	-5.63316
CNOT3	2.67811	2.61644	1.8063	2.4437	2.1568	2.56055	2.6295	2.2766	2.02983	2.21406	3.25965	2.55265	1.7873	2.12141	1.97759	2.61525	2.26654	2.0587	2.48597	2.36478	2.12317	2.41561	2.28688	2.7098	2.42239	2.6295	3.23357	2.58536	2.34402	-0.11916	2.40179	-0.932727	0.358162	0.555003	-5.93199
CNOT4	1.99923	2.1486	2.11164	1.9715	1.96669	2.00892	2.23019	1.88951	1.97941	2.1372	1.90926	1.9216	2.2439	2.351	2.35385	2.27598	2.47465	1.90446	1.99689	1.98203	2.02342	2.00954	1.95984	2.70672	2.22974	1.81951	2.55203	2.11225	2.22122	-0.0104045	2.12037	-0.121827	0.903822	0.948708	-6.35428
CNOT6	2.74225	2.78186	2.82838	2.29798	2.74197	2.66856	2.71619	3.13526	3.12291	3.07653	3.19322	2.8275	2.64618	2.57838	2.47328	2.51576	2.7925	2.83007	2.39284	2.93157	2.71353	2.66742	2.48099	2.59108	2.58914	2.81313	2.68721	2.30247	2.59933	0.139634	2.71508	1.6051	0.118602	0.279609	-5.12314
CNOT7	3.27446	3.35419	3.58865	3.26881	3.68957	3.59559	3.26083	3.40311	3.30114	3.31672	3.26237	3.46277	3.14176	3.30736	3.2003	3.26083	3.24321	3.29665	3.3313	3.30629	3.58467	3.46227	3.23997	3.55405	3.35455	2.92815	3.59289	3.06935	3.31808	0.0124038	3.34379	0.173696	0.863233	0.925657	-6.3466
CNOT8	2.37797	2.52391	2.61702	2.38483	2.38562	2.50995	2.61163	2.61405	2.72035	2.61702	2.55135	2.56148	2.68165	2.58792	2.69991	2.36838	2.17726	2.34044	2.34968	2.4579	2.52763	2.45196	2.42597	2.64559	2.6028	2.16278	2.21299	2.66079	2.778	0.0607961	2.50368	0.88918	0.380748	0.576794	-5.97068
CNOT9	2.557	2.39872	2.12194	2.52202	2.44986	2.41201	2.68721	2.22753	2.83821	2.57986	2.37997	3.10234	1.95592	2.2558	2.36144	1.78937	1.83701	2.33352	2.66515	2.5106	2.34133	2.47007	2.6245	2.84937	2.42088	3.06967	2.72627	2.72006	2.75045	-0.242536	2.48131	-2.18589	0.036492	0.12863	-4.13991
CNPPD1	2.68308	3.20539	2.91535	2.72035	2.96488	2.7961	2.87949	2.44265	2.49223	2.5226	2.48129	2.52179	2.73363	3.22803	2.91535	2.86228	2.77824	2.90492	2.74691	2.85577	2.38447	2.87264	3.48428	2.65401	3.09449	2.65401	3.18393	2.62923	2.81868	-0.0838427	2.8078	-0.847075	0.403439	0.595269	-6.00641
CNR1	1.68949	1.65145	1.777	1.75013	1.79319	1.82056	1.70326	3.01619	2.71875	3.15559	1.16164	0.58514	4.40466	4.0118	1.76101	1.45021	3.54224	1.70141	1.79698	1.85882	1.64419	1.6681	1.35171	0.79966	1.33876	1.88543	2.7113	0.94637	2.9121	0.516939	2.02094	1.62063	0.115215	0.273994	-5.10003
CNR2	2.95533	2.2774	2.48661	2.87702	2.57926	2.71379	2.57603	3.62186	3.3662	2.65482	3.06439	3.33968	2.93456	2.25478	3.19732	2.75843	2.01432	3.25082	2.81112	2.85297	2.85297	2.75789	2.54715	3.25507	2.34442	2.28902	2.38152	2.57603	2.72658	0.083759	2.76956	0.590718	0.558987	0.720064	-6.18788
COA1	3.42447	3.20385	3.16331	3.70426	3.67041	3.40517	3.17985	3.05616	3.2612	3.00346	3.11359	3.44469	3.18904	3.41874	3.28408	3.12564	3.21029	3.3589	3.43784	3.56371	3.55859	3.40434	3.57609	3.24089	3.41368	3.27267	3.40256	3.08629	3.66857	-0.129566	3.33939	-1.72122	0.0951685	0.243984	-4.94594
COA3	3.70605	3.76822	3.66776	3.69914	3.54224	3.80374	3.59905	3.18284	2.99915	3.11908	3.28325	3.56154	3.2867	3.84107	3.753	3.92627	3.73744	3.67884	3.69829	3.7234	3.29816	3.62328	3.9588	3.84228	3.06165	3.29527	3.60744	3.12412	3.57731	0.0167065	3.55053	0.158522	0.875073	0.931805	-6.34913
COA4	2.76234	2.75682	3.10317	2.71565	2.72658	2.96356	2.78264	2.86096	2.78563	2.58653	3.20539	3.09954	2.28288	2.55563	2.3183	2.68637	2.65847	2.80839	2.72035	2.92693	2.68165	2.64754	2.80714	2.58602	3.05616	2.63848	3.43551	2.79377	2.97214	-0.083596	2.7905	-0.892498	0.378995	0.576475	-5.96779
COBLL1	2.12141	2.31234	2.183	2.26422	2.27358	2.43078	2.16854	2.67311	2.50941	2.54867	2.79297	2.67778	1.82544	1.9614	2.12387	2.28431	2.04512	1.95847	2.63062	2.30029	2.12194	2.40273	2.28816	2.20757	2.25763	2.73998	1.80992	2.87293	2.68819	-0.0508914	2.3267	-0.465692	0.644688	0.782066	-6.25344
COG2	2.87422	2.89772	3.18013	2.89066	3.10049	3.21716	3.15866	2.53276	2.57186	2.48597	2.41233	2.81085	3.23743	3.0874	3.12503	3.195	3.46434	3.2147	3.09107	3.23316	2.99274	3.1713	3.21367	3.43859	3.01181	2.73022	3.58607	3.00945	3.14627	-0.197843	3.03728	-1.91194	0.0651554	0.191429	-4.63317
COG5	3.08107	2.9561	3.1688	2.83701	2.81868	2.84244	3.20631	2.88109	2.94515	2.90199	2.72062	3.62673	2.80178	3.03711	3.02657	2.96189	3.08712	3.12235	3.09563	3.00945	3.06559	3.06165	3.02002	3.14207	3.09082	2.66212	2.7922	2.62141	3.23316	0.00110617	2.99369	0.0136552	0.989192	0.993382	-6.36162
COG7	2.77151	2.8126	2.71983	2.7434	2.42519	2.56955	2.86774	2.79845	2.79716	2.66567	2.72704	2.67066	2.94455	2.92198	2.85985	2.9121	3.15638	2.56365	3.03454	2.80735	2.7031	2.74058	2.9898	2.89495	2.38912	2.61879	2.99485	2.02741	2.4149	0.10451	2.74285	1.17888	0.247405	0.442699	-5.68097
COIL	1.78937	2.28957	2.04837	1.96224	2.32795	1.9233	1.93975	2.3421	2.11369	2.12567	2.34319	2.48624	1.8795	1.98537	1.7799	1.95759	2.02642	1.96411	2.07433	1.94184	2.06213	1.97469	2.13112	2.1083	2.38035	2.39824	2.42045	2.31288	2.21939	-0.0879933	2.11407	-1.11556	0.273174	0.471101	-5.75072
COL14A1	2.7609	2.41818	2.96298	3.32911	4.46299	3.08712	2.46233	3.40917	4.09415	4.67629	3.44579	2.55792	4.46711	1.70858	2.06151	3.07148	2.99991	1.61599	2.1656	1.73236	2.99514	2.02557	2.17191	2.82271	2.75347	1.53409	1.91412	1.74091	2.01432	1.05118	2.74006	4.06166	0.00030724	0.0070343	0.219447
COL15A1	3.45143	3.85717	3.94779	3.97372	4.80845	3.82053	3.78212	3.88513	4.39571	4.35339	3.4284	4.73762	3.94338	2.88159	3.98813	4.09826	3.61065	3.95729	4.62019	3.09599	4.30958	4.23489	3.90602	4.32624	4.0118	4.03102	2.38333	3.44642	3.36492	0.13172	3.88452	0.678362	0.50257	0.677842	-6.13289
COL1A2	3.5521	3.79589	4.07517	4.12705	5.79593	4.54598	3.58865	4.51691	4.79923	4.79923	4.80845	3.19458	4.52242	2.70193	4.08808	4.58054	4.05582	2.70365	3.31929	2.59804	3.13295	3.26632	3.54224	3.23535	2.3171	2.64867	2.37559	2.68019	2.31545	1.36413	3.64423	6.15433	7.88e-07	0.000238797	5.85389
COL21A1	4.11091	4.15142	3.51061	3.8252	4.4309	3.77562	3.44172	3.54615	3.98965	3.58281	4.14905	4.52731	3.56829	3.76926	3.88227	3.36915	3.58281	3.47764	3.47218	3.30377	3.84911	3.3448	2.82198	4.24648	2.45921	1.72667	3.36454	3.85996	4.573	0.461122	3.64526	2.30321	0.0281319	0.110019	-3.91399
COL3A1	3.76295	3.7622	4.87053	4.24648	5.94051	5.04478	3.85315	4.94338	5.23293	5.30508	5.61375	4.19377	4.46299	2.92459	4.51149	4.63567	4.36831	3.17289	3.78684	2.86201	3.60322	3.97372	3.39367	3.7969	2.46233	2.4353	2.69331	3.01596	2.34599	1.44046	3.97292	5.84861	1.88e-06	0.000334461	5.03095
COL4A1	3.67372	3.46735	3.82665	4.11091	3.81072	3.86124	4.04675	3.18669	3.33929	3.61355	3.46379	3.11023	3.64077	3.32366	3.80742	3.86503	4.46299	3.27446	3.42989	3.34239	3.30808	4.01759	4.21664	3.47661	4.1587	3.68594	2.63142	3.58807	2.39353	0.222711	3.59083	1.38984	0.174467	0.354682	-5.42365
COL4A2	3.90128	3.38217	3.70164	3.92164	3.65661	3.7913	4.12007	3.539	2.97931	3.69388	3.63498	2.95101	3.50933	3.39232	3.68878	3.9588	4.70878	3.39581	3.49223	3.47344	3.50825	3.97175	4.33839	3.11479	3.87734	3.9167	2.77774	3.26266	2.68798	0.193532	3.59821	1.20429	0.237582	0.430553	-5.652
COL4A3	2.75157	2.02557	2.16795	2.10056	4.38278	2.24099	2.42944	2.98774	3.85315	3.52762	3.34084	1.8063	3.17217	2.14983	2.75237	3.18106	2.62841	2.36224	1.97058	2.08781	1.8905	2.01803	1.62722	2.00805	2.11751	1.4923	1.8126	2.40032	2.42414	0.776412	2.47275	3.74609	0.000735036	0.0120365	-0.596484
COL4A5	2.50238	2.63848	2.81708	2.80839	3.0763	2.74552	2.76556	2.94967	3.56909	3.53372	3.3662	2.27038	3.15759	2.17531	3.00292	3.34859	2.72601	2.39872	2.74897	2.13112	2.43327	2.49646	2.04212	3.48318	1.81951	1.11454	3.85996	1.54253	2.92641	0.492611	2.70517	2.35467	0.0250441	0.103048	-3.81228
COL4A6	2.6097	2.51911	2.30961	2.35308	2.12567	2.43186	2.69845	2.25727	2.25478	2.35459	2.07097	2.76891	2.68841	2.75964	2.77445	2.61825	2.82348	2.60777	2.42126	2.93234	3.17075	2.24099	2.63283	2.77185	2.19888	2.43359	3.35639	2.48038	2.52507	-0.152486	2.55829	-1.38814	0.174981	0.354974	-5.42588
COL5A1	2.60359	3.03711	2.86396	2.98038	3.8956	3.0587	2.94676	3.12838	3.62328	3.57541	3.57938	2.78945	3.51852	2.49322	3.24214	2.79146	2.92028	2.20209	2.57216	2.24001	2.62087	2.45015	2.70193	2.67639	2.17035	2.61586	2.32795	2.47076	1.80125	0.7163	2.82405	5.59642	3.87e-06	0.000541331	4.34844
COL5A3	2.95477	2.92003	3.26743	3.30773	2.91411	3.21145	3.32634	2.7979	2.76501	1.78937	2.09749	3.60999	3.70426	3.86503	4.21664	3.91396	3.7511	3.51926	3.42092	3.5521	3.46434	3.23357	3.47011	3.13072	2.22703	3.53838	2.76938	3.35241	2.67465	0.00466916	3.19881	0.0232613	0.981591	0.988114	-6.36144
COL6A1	3.19132	3.35122	3.10413	3.46136	3.57842	3.16497	3.67798	3.61355	3.97812	3.63707	2.78835	2.98288	3.65426	2.9909	3.56095	3.15894	3.52161	3.20958	3.40352	3.17586	3.41508	3.18393	3.3572	2.65876	3.15926	3.56308	2.71296	3.06748	2.70577	0.243041	3.27684	2.10842	0.0431673	0.144397	-4.28441
COL6A2	2.76698	3.09719	2.94483	3.09292	3.23777	3.23177	3.342	3.35045	3.45452	3.77672	2.42344	2.67254	4.26861	3.02801	3.3662	3.46136	3.41268	3.0057	3.41004	3.13928	2.92198	2.90492	3.49483	2.7611	2.97711	2.92941	2.23316	2.65371	1.89619	0.370438	3.07777	2.35442	0.0250582	0.103048	-3.81277
COL6A3	3.3097	3.755	4.26345	3.94338	4.45928	4.06115	3.67615	4.59827	4.66736	4.98887	4.28113	3.52829	4.50718	3.72421	3.04819	4.08555	3.24635	3.93075	4.21664	3.62913	3.93075	3.44357	3.65193	3.55146	3.15825	2.93075	2.36066	3.64884	3.15559	0.541081	3.78455	2.8393	0.00790788	0.0485807	-2.78406
COL7A1	2.56339	2.73077	2.77268	2.70672	2.54066	2.65291	3.18773	2.34666	2.53193	2.05133	2.58325	2.05635	3.58938	2.97775	4.29291	3.15825	3.2707	2.46788	2.37317	2.84558	2.87998	2.6602	2.40421	3.16372	2.07635	1.82411	3.12473	1.78221	3.37589	0.242815	2.72384	1.24811	0.221326	0.411627	-5.60072
COL8A1	1.78848	1.80483	1.83789	1.88951	1.51266	1.18753	1.73947	1.25373	2.02557	2.42558	2.58152	1.06527	3.06025	2.0063	2.10776	2.59074	3.51995	1.11454	0.966551	1.37631	1.3101	1.33432	2.47867	1.79319	1.18753	1.39912	1.60202	1.38753	1.38753	0.578572	1.78395	2.88301	0.00709366	0.0460497	-2.68565
COLEC11	3.28589	3.47623	3.05809	3.87614	4.09023	3.77351	3.01892	3.2867	4.69158	3.51926	4.94338	3.29705	3.73052	2.94783	2.65054	2.39284	3.33167	3.11359	3.17349	3.18071	2.93015	3.04275	2.54925	3.07394	3.5534	2.68798	3.87734	2.31194	2.81602	0.466495	3.29934	2.26863	0.0303956	0.11464	-3.98144
COLEC12	2.47107	2.14424	3.0838	2.79562	2.90145	2.35179	2.67778	3.41976	3.16299	3.59559	2.6442	3.0123	3.77351	2.18999	2.21877	2.61496	2.65544	3.16399	2.90391	1.98537	3.0745	2.5034	3.26042	2.93491	2.54834	2.43846	1.50021	1.85992	2.88316	0.218614	2.7162	1.17814	0.247698	0.442851	-5.68181
COLGALT1	2.86902	2.7445	3.1227	2.95533	2.92333	3.24668	3.18213	3.36915	3.06139	3.43172	2.4948	2.71007	3.37896	2.68075	2.97072	3.2685	2.99485	3.12779	3.16199	2.81313	2.9561	3.05285	3.37684	2.63791	3.011	2.83236	2.86034	2.76831	2.73417	0.0794008	2.99094	0.83584	0.409635	0.601113	-6.01567
COMMD10	3.26999	3.1233	3.18579	3.32591	3.12382	3.44532	3.04819	3.16441	3.19002	3.04819	3.31672	3.49392	3.02058	3.19067	3.23777	2.84427	3.27446	3.32136	3.23707	3.24282	3.60596	3.52216	3.23214	3.3835	3.3313	2.57926	3.42933	2.78662	3.63433	-0.081173	3.2279	-0.899257	0.375441	0.572826	-5.96188
COMMD3	3.01471	3.32911	3.46084	3.55553	3.57286	3.55029	3.45923	3.25118	3.20482	3.13135	3.23707	3.42092	3.30217	3.80494	3.55146	3.59621	3.6505	3.59905	3.44579	3.53715	3.374	3.54547	3.77672	3.39875	3.13815	2.80532	3.53838	2.52834	3.22629	0.0911291	3.37954	0.871805	0.39001	0.583552	-5.98562
COMMD8	3.54491	3.50097	3.59289	3.5123	3.55079	3.60527	3.26369	3.30483	3.2476	3.27112	3.82251	3.58015	3.45143	3.63498	3.49791	3.30443	3.58202	3.35546	3.0254	3.28635	3.11023	3.47853	3.35085	3.23577	2.87975	2.68411	3.13347	2.51946	3.53441	0.353527	3.34006	3.91652	0.000459877	0.00886116	-0.15839
COMMD9	2.75578	2.84372	2.89927	2.89431	3.04513	2.95975	2.74967	3.36875	3.72421	3.28754	3.74647	2.72399	3.31075	3.06387	2.90414	2.80559	2.74807	3.3572	3.0888	3.19662	2.98493	3.17954	2.92302	2.94566	2.43465	2.63533	2.85653	2.44917	2.80639	0.144063	2.98927	1.24027	0.224173	0.413537	-5.61002
COMT	3.33968	3.27654	3.09323	3.32749	3.30518	3.36384	3.32461	2.66464	3.0664	2.73132	2.8158	2.28902	3.59162	3.6226	3.38696	3.20482	3.41925	3.19364	3.05972	3.0584	2.98608	3.23177	3.32669	2.81984	3.09871	2.74225	3.48658	3.21243	3.41724	0.0299461	3.15367	0.261783	0.795219	0.882443	-6.32741
COPA	3.35639	2.65291	2.86375	2.82198	2.32183	2.60359	2.96577	2.57045	2.65996	2.62389	3.13434	2.64559	2.19941	2.63233	2.27902	2.21142	2.62164	2.21498	2.18742	2.12687	2.93577	2.84103	2.72354	2.26139	2.67148	3.26197	2.89883	2.85684	3.043	-0.0118717	2.66163	-0.094488	0.925329	0.960011	-6.35724
COPB1	3.14868	3.16791	3.12473	3.33516	3.34906	3.1995	2.93738	3.45248	3.31627	3.25669	3.59504	3.25393	2.73444	2.76164	2.58268	2.70762	2.90276	3.01688	3.0469	3.07423	3.10443	3.10288	2.97375	2.3811	3.416	3.37485	2.86873	3.37031	3.117	0.0368203	3.09217	0.345871	0.731774	0.8394	-6.30189
COPG1	3.24868	3.5323	3.28823	3.15638	3.03835	3.0469	3.33331	2.88849	2.41373	2.48162	2.9663	2.5298	3.01471	3.74263	3.37535	3.43452	3.47962	2.69607	2.70524	2.4783	2.96329	3.13347	3.34282	3.52895	2.37687	2.77398	2.88969	2.68771	2.84628	0.24738	3.01357	1.86605	0.0715118	0.204058	-4.71083
COPS2	3.22557	3.01573	3.1713	2.86443	3.01596	3.05714	3.13741	2.81842	2.75904	2.95101	2.9121	2.95079	2.76465	3.01771	2.75682	3.02657	3.06748	2.94783	2.7359	2.93261	2.7961	3.33087	2.93043	3.56985	3.21891	2.68165	2.96428	2.96853	3.01075	-0.0360059	2.9862	-0.458674	0.649665	0.785548	-6.25667
COPS3	2.89402	3.13928	3.15734	2.85225	2.97271	3.07733	3.2267	2.84402	2.85175	2.93157	3.1054	3.23671	2.56543	3.13463	2.72227	2.78835	2.94515	3.10513	2.89724	3.24429	3.08075	3.36748	3.05469	3.33806	3.23214	3.24507	2.79562	3.15236	3.16051	-0.172096	3.03856	-2.33643	0.0261018	0.105496	-3.84851
COPS4	3.60999	3.82335	3.67372	3.49596	3.64884	3.6771	3.46486	3.29009	3.54439	3.52469	3.4312	3.74899	3.2563	3.53962	3.33407	3.38696	3.43268	3.62529	3.64371	3.72519	3.54153	3.72613	3.48318	3.64507	3.43225	3.49596	3.6241	3.23884	3.58079	-0.0409832	3.53948	-0.629467	0.533651	0.701036	-6.16448
COPS5	3.39141	3.3572	3.45097	3.40647	3.43596	3.39496	3.56436	2.85849	2.93382	2.81818	2.8032	3.721	3.03742	3.65193	3.11299	3.09141	3.40111	3.49432	3.78212	3.7913	3.73831	3.55553	3.56511	3.67977	3.6505	3.4587	3.68502	3.76629	3.753	-0.399357	3.42589	-4.35412	0.000135095	0.00441122	0.991568
COPS6	3.10773	2.91922	2.75682	3.01596	2.92641	3.06727	3.1227	2.59369	2.26937	2.53315	2.49943	2.95507	2.87179	3.46136	2.92408	2.99371	3.20063	3.11142	3.08965	3.18503	2.90038	2.95394	3.20958	3.24544	2.68333	3.19702	3.14868	3.05469	3.07122	-0.175666	2.96789	-1.86047	0.0723189	0.205393	-4.72015
COPS7A	3.13712	3.31808	3.32099	3.40161	3.28894	3.29629	3.26335	2.89066	2.86492	2.83821	2.74131	3.64884	3.34365	3.42933	3.1614	3.28754	2.931	3.2867	3.29891	3.43826	3.28823	3.25588	3.32052	3.44134	2.99561	3.45397	3.29779	3.06356	3.28823	-0.099677	3.22732	-1.19693	0.2404	0.433356	-5.66046
COPS8	3.0888	3.08857	3.32591	3.21605	3.20601	3.1185	3.25469	2.59835	2.8149	2.85985	3.16399	3.19561	2.91002	3.59367	2.89748	2.99699	3.06907	2.92542	2.73824	3.0376	2.98441	3.11734	3.18213	2.95312	3.0587	2.78741	2.97072	2.90038	3.27654	0.087928	3.04588	1.09907	0.280192	0.477762	-5.7683
COPZ1	2.84937	3.01619	3.15398	3.05311	3.02458	2.89979	3.19322	3.01745	2.43259	2.7047	2.73768	3.22771	2.53382	3.18636	2.88777	2.83347	3.17103	2.83323	3.02204	2.97123	2.85544	3.22629	3.0855	3.16566	3.08989	2.78444	3.24056	2.75964	3.14795	-0.0785193	2.96913	-0.943489	0.352719	0.54938	-5.92216
COPZ2	3.35599	3.37444	3.29527	3.37068	3.55608	3.22703	3.44747	3.38696	3.43503	3.44019	3.83619	3.14795	3.53441	3.20063	3.20732	3.21438	3.37979	3.24127	3.16399	2.8151	3.05227	3.01075	2.93816	3.35765	2.47197	2.89005	3.2974	2.63206	2.70601	0.412326	3.20643	4.82474	3.54e-05	0.00221839	2.2551
COQ10B	3.61704	3.47103	3.45768	3.38568	3.29009	3.44081	3.36532	2.65456	3.01125	2.8489	3.48792	3.043	2.93357	3.40111	3.01745	3.1792	3.20155	2.84402	2.8882	3.0083	3.19067	3.39406	3.24807	3.40311	3.44579	3.35374	2.92459	3.46643	3.12235	0.0331161	3.21019	0.343864	0.733268	0.840275	-6.30258
COQ2	2.02741	2.45256	3.0286	1.85808	2.08781	2.49983	3.03188	2.2594	1.86282	2.18054	2.30247	1.91982	2.62189	2.7609	2.77558	2.43215	2.98747	2.9864	2.59619	2.83728	2.78058	3.16266	2.81602	3.05338	2.63637	2.768	2.78945	3.08409	3.11607	-0.468527	2.61089	-3.81304	0.000611766	0.0109198	-0.425168
COQ3	3.3356	3.18284	3.31543	3.28967	3.02933	3.28931	3.37248	2.92862	3.19428	3.20992	3.17985	3.92767	2.58411	3.08712	3.00777	3.08824	3.02429	3.6226	3.73417	3.67446	3.42315	3.27853	3.2685	3.51061	3.39187	3.42989	3.46379	3.37068	3.47582	-0.291131	3.29968	-3.28468	0.00253506	0.0243804	-1.74467
COQ6	2.97875	2.82065	2.8238	3.09046	2.82587	3.16266	3.25705	2.43292	2.71432	2.44154	2.57658	3.27446	2.51698	2.99746	2.91762	2.60721	2.72143	2.82666	2.89634	3.00433	2.78593	3.30584	3.19296	3.18839	2.72035	3.22834	3.20992	3.27853	3.37305	-0.251293	2.93691	-2.60818	0.0138745	0.069538	-3.28949
COQ7	3.0838	2.94594	2.51698	2.80396	2.68075	2.53478	2.93867	2.47007	2.11421	2.27523	2.58127	2.80473	2.81735	2.92918	2.8272	2.8123	3.23467	2.77398	2.97681	2.94398	3.07394	3.02587	2.92459	2.97681	2.8144	3.14596	2.96245	2.93382	3.18636	-0.250537	2.83138	-2.78273	0.00909226	0.0532547	-2.91013
COQ8A	2.7699	3.36198	3.42499	3.23316	3.73141	3.35546	3.78808	3.31159	3.76019	4.14031	3.99524	3.53503	3.38742	2.99012	3.30896	2.84155	2.8149	4.31593	3.7913	3.98671	4.51149	4.42678	3.07681	4.38278	3.84228	3.61224	4.2437	3.78556	3.61988	-0.569213	3.63261	-3.80653	0.000622802	0.0109991	-0.441864
CORIN	0.966551	0.502529	2.16613	2.25095	2.96086	0.65695	4.14249	3.86776	0.837933	2.42729	0.412194	4.15645	3.1527	3.31672	2.62362	1.71328	2.27865	4.95646	4.92512	4.91185	2.05422	3.20184	3.41004	4.50264	3.74167	3.25118	3.50046	3.4141	2.89086	-1.46927	2.86874	-3.67593	0.000890099	0.013408	-0.774864
CORO1B	3.27605	3.02565	2.93714	3.21647	3.18773	3.14627	3.11359	3.56909	3.2147	3.60458	2.59868	3.23316	3.11479	3.01181	3.07792	2.84607	3.18071	3.20923	3.35495	3.07984	3.19815	3.16018	3.53781	2.96217	2.92271	3.22703	2.94102	2.80044	2.62421	0.0536816	3.11628	0.57679	0.568242	0.726872	-6.19594
CORO1C	3.21788	2.93382	3.16266	3.01573	2.93015	2.70762	3.16818	3.33848	2.94834	3.31705	2.8834	2.73564	3.1662	3.02933	2.79123	2.93491	2.69932	2.88777	3.02887	2.89326	3.15926	3.0115	2.9499	2.73768	3.14146	3.22081	2.86973	3.22341	2.44689	0.0346085	2.9845	0.414937	0.681043	0.808414	-6.27569
COTL1	1.3101	1.27247	1.72085	1.71328	1.9844	1.90926	1.53409	4.02696	3.07423	3.09636	3.14079	2.17142	2.69012	1.39089	2.60543	2.80375	1.64927	1.83601	2.03967	1.4186	1.78514	2.08914	1.64419	0.898405	2.00153	2.08585	1.35171	1.58519	1.00386	0.595863	1.99424	2.50727	0.0176121	0.0816526	-3.50178
COX10	3.47303	3.13113	3.539	3.50772	3.15559	3.44997	3.3444	2.54683	3.00234	2.73849	2.75071	3.64371	3.24668	4.26861	3.31705	3.28363	3.27737	3.15983	3.30377	3.57896	3.29357	3.40394	3.85717	3.71906	3.08208	2.95641	2.58968	3.18307	3.45923	-0.0238231	3.28493	-0.173078	0.863714	0.925657	-6.34671
COX11	2.37485	2.56365	2.42729	2.3505	2.55434	2.44751	2.44265	2.62977	2.55176	2.56924	2.71744	2.94676	2.52763	2.49548	2.54232	2.23821	2.39171	2.39029	2.40553	2.68385	2.43113	2.48417	2.09129	2.77497	2.22322	2.66052	2.50869	2.47761	2.74832	0.025983	2.5052	0.353781	0.725895	0.835968	-6.29913
COX15	2.53478	2.931	2.75237	2.44484	2.44234	2.60632	2.81366	2.81928	2.91874	2.76234	2.94542	2.92361	1.99994	2.81788	2.51236	2.55883	2.6028	2.57685	2.50467	2.68046	2.58476	2.77851	2.37797	3.3412	2.26139	2.17837	2.86345	2.48762	3.16468	0.0198003	2.6616	0.182071	0.856711	0.922444	-6.34511
COX16	2.43691	2.4704	2.36559	2.25272	2.65706	2.54361	2.4086	2.49512	2.14348	2.23562	2.51378	2.69877	2.23677	2.62749	2.36732	2.34514	2.60249	2.53071	2.34133	2.47427	2.33222	2.64182	2.60249	2.47653	2.70704	2.84129	2.50016	2.58502	2.59301	-0.116811	2.48368	-1.7646	0.0874732	0.232226	-4.87712
COX5A	4.27863	4.49691	4.61256	4.22627	4.03893	4.41671	4.20489	4.22356	4.2552	4.1869	4.32998	5.30508	3.00121	3.63003	3.1773	3.21681	3.57938	4.59194	4.66736	4.53306	4.37215	4.59827	3.77562	4.39571	4.55864	4.67629	4.35339	4.74539	4.63567	-0.422526	4.24427	-2.45074	0.0200907	0.0891414	-3.61833
COX6A1	3.66023	4.04866	3.87322	3.97812	4.32624	3.9937	3.42989	3.88363	3.51341	3.82251	4.17895	3.67286	3.55079	3.70503	3.53095	3.88513	3.81298	3.90602	3.8587	3.93768	3.77454	3.73141	4.10004	3.34566	3.4973	3.6364	3.66183	3.26443	3.51555	0.129867	3.76193	1.372	0.179901	0.35998	-5.44687
COX6A2	5.33634	5.20097	5.23293	5.41546	5.46315	5.61375	5.51918	4.35339	3.5323	3.87989	4.35655	5.41546	4.88255	5.51918	5.56279	5.61375	5.56279	5.79593	5.51918	5.68045	5.51918	5.37873	5.56279	5.94051	4.72061	5.11991	5.20097	4.91185	4.97369	-0.27441	5.19946	-1.37517	0.178925	0.359318	-5.44276
COX6B1	4.12491	4.05391	4.20751	4.23489	3.96332	4.23489	4.14474	3.39454	2.5106	2.87642	3.36077	3.96171	4.0191	4.45928	4.37918	4.50718	4.50264	4.28642	4.40025	4.34254	4.17307	4.21664	4.58054	4.34946	3.80618	4.10258	4.18185	3.83013	4.14704	-0.264005	4.04663	-1.57981	0.124291	0.2867	-5.16036
COX6C	4.16343	4.32624	4.12007	4.33271	4.61256	4.13372	4.06888	3.93768	3.83013	3.67111	3.92627	4.48603	3.33596	3.9588	3.58079	3.80038	3.87989	4.27545	4.25237	4.35655	3.98163	4.28371	3.90408	4.05739	4.12491	4.38741	4.06306	4.21224	4.34254	-0.177095	4.08297	-1.72951	0.0936554	0.241925	-4.93289
COX7A1	4.30238	4.51149	4.30665	4.41203	4.34254	4.30665	4.51691	3.79791	3.73052	3.755	3.60657	4.42678	3.95427	4.37215	4.35655	4.23489	4.44007	4.58581	4.58581	4.73762	4.00798	4.59194	4.26861	3.86124	4.30665	4.43545	4.43545	4.37551	4.00798	-0.151572	4.26115	-1.39551	0.172769	0.352847	-5.41622
COX7A2	4.20113	4.33271	4.45928	4.43545	4.47207	4.37551	4.15479	4.05391	3.88363	3.8956	4.22906	4.46299	3.47303	4.08171	3.79915	3.82665	4.16806	4.30958	4.24965	4.33568	4.34628	4.21005	4.08328	4.13602	3.97372	4.18938	3.91516	4.14031	4.46299	-0.0604368	4.16058	-0.650043	0.520448	0.691858	-6.15146
COX7A2L	3.6505	3.88227	3.95577	3.6399	3.74807	3.88513	3.50573	3.33087	3.56233	3.54022	3.753	3.94185	3.41724	3.78556	3.55736	3.66857	3.67798	3.73417	3.71475	3.6399	3.87172	3.70426	3.75889	3.90888	3.6005	3.21243	3.6505	3.0083	3.36838	0.0788867	3.64397	0.915435	0.367023	0.563926	-5.94756
COX8A	4.4444	4.52731	4.40827	4.55257	4.34946	4.24022	4.60506	3.7234	3.66776	3.7969	3.93912	4.1068	3.97708	4.33568	4.27863	4.46299	4.40827	4.42148	4.49197	4.48603	4.37918	4.43545	4.47613	4.25785	4.09023	4.37551	4.35655	4.28937	3.95427	-0.109566	4.27027	-1.12898	0.267559	0.465225	-5.73623
CPD	2.89038	2.62809	2.87843	2.90464	2.96381	2.91973	2.73132	3.03554	2.93607	3.28024	2.53852	2.8269	3.10481	2.61405	3.03918	2.95757	2.99514	2.85745	2.92984	2.64808	2.71186	2.61556	2.90492	2.89547	2.93327	2.44517	2.16795	2.58914	2.70193	0.196678	2.81535	2.41228	0.0219548	0.0941934	-3.69659
CPE	3.04912	2.84216	3.14207	3.11023	3.18428	3.14771	2.65189	3.41229	3.34398	3.28363	3.49111	2.67552	2.69141	2.29798	2.87179	2.26599	3.26923	2.33891	3.0436	2.38527	2.15628	2.56635	2.75396	2.25893	3.14481	2.56023	2.70496	2.39387	2.56607	0.411372	2.81392	3.26646	0.00265906	0.0249567	-1.78865
CPEB3	2.27598	2.51661	2.35223	2.31194	2.45053	2.34551	2.28332	2.48	2.30794	1.98768	2.75843	3.24248	2.4958	2.69991	2.72305	2.78945	2.50768	2.62609	2.65268	2.09204	2.62869	2.27486	2.14686	3.50718	2.12858	1.60646	2.35385	2.27218	2.44024	0.107536	2.45718	0.80778	0.425366	0.614932	-6.03827
CPED1	3.24807	2.92117	2.63609	2.62281	2.52607	2.44648	2.31623	2.77774	3.30808	2.65189	3.43826	1.7119	2.36559	3.04721	3.32099	3.26632	2.57838	2.89251	2.10508	2.36358	2.64249	2.41789	2.6442	2.23412	2.21982	2.50804	2.24483	2.03804	2.97572	0.33496	2.63688	2.29476	0.0286705	0.111215	-3.93053
CPNE3	3.12619	3.24507	3.1527	2.8275	2.78337	3.08576	3.11	2.59506	1.9592	2.39171	2.83347	3.21396	3.26443	3.2867	3.36988	3.06248	3.52349	3.1688	3.04132	2.79404	3.89694	3.39367	3.68255	3.7499	3.19132	2.34442	2.98547	2.70337	3.60322	-0.222862	3.08228	-1.44509	0.158456	0.335427	-5.35009
CPOX	2.28105	2.42344	2.55827	2.2553	2.31098	2.32795	2.3198	2.947	2.51517	2.54925	2.91583	2.86729	2.12387	2.26193	2.32592	2.06898	2.26506	2.37997	2.073	2.41412	2.20636	2.2043	2.05781	2.62841	2.20061	1.93788	2.4188	1.81128	3.36875	0.121976	2.37995	1.00608	0.322157	0.521747	-5.86289
CPPED1	1.50666	1.72956	1.63109	1.61804	1.693	1.63722	1.57592	2.24099	1.79698	1.94629	2.08003	1.80763	1.18037	1.81845	1.58714	1.44669	1.94526	1.693	1.60646	1.66524	1.46053	1.68949	2.1656	2.22876	1.96669	2.49943	1.7119	1.86655	2.242	-0.179559	1.79438	-1.70356	0.0984595	0.249131	-4.97354
CPQ	2.63114	2.8292	3.05311	2.97247	3.09533	2.85605	2.92028	2.95208	2.69225	2.95025	2.17191	2.3704	3.7611	3.01979	2.82452	2.74807	4.1705	2.92941	3.17615	3.39141	2.84275	2.73185	3.32413	2.94054	3.277	2.57014	2.96086	2.4353	2.46605	0.0217961	2.93324	0.145999	0.884867	0.936746	-6.35103
CPSF4	2.87293	2.76891	2.71162	3.23817	3.06165	2.97875	2.88287	2.75533	2.36437	2.14799	2.15477	2.79297	2.9205	3.1227	2.89547	2.98695	2.97902	3.00747	3.02458	3.21716	3.12444	2.80921	3.04941	3.32206	3.14176	3.21647	3.22739	2.99864	3.20385	-0.309811	2.93025	-3.18701	0.00327112	0.0286775	-1.97914
CPSF6	2.70448	2.81007	2.66079	2.43846	2.70071	2.89463	2.71479	2.4509	2.33313	2.50804	2.42628	2.57864	2.52904	2.8163	2.6941	2.52904	2.75736	2.24579	3.00777	2.75318	2.6022	2.74028	2.54328	2.69579	2.74897	2.92485	2.74947	3.50333	2.88462	-0.162897	2.6878	-1.84173	0.0750902	0.210091	-4.75136
CPSF7	3.04752	3.0763	3.09257	3.2985	3.24507	3.29009	3.26443	3.66857	3.55918	3.37444	3.32206	3.315	2.84675	2.79198	2.67691	2.83531	2.84505	3.13776	3.38142	3.28754	3.32749	3.05088	2.68075	2.88411	3.30443	3.53037	3.03188	3.38068	3.06415	-0.021805	3.15901	-0.216691	0.829868	0.904511	-6.3382
CPVL	3.47714	3.7322	3.55608	2.78714	2.93761	3.64884	3.26812	2.51973	2.75157	3.39048	3.26481	3.47261	3.17418	3.62112	3.72421	3.3954	3.64156	3.65501	2.30159	3.38784	3.06334	3.89977	3.52829	3.82783	2.68819	3.15432	1.52071	3.33481	3.82154	0.133522	3.26021	0.696588	0.491246	0.670026	-6.12053
CR1	1.75661	1.35654	1.6681	1.81951	1.57846	1.98279	1.693	3.66603	3.18013	2.73469	2.64675	0.898405	2.44689	1.79194	2.15532	2.59562	1.44669	1.68321	1.74091	1.9361	1.68477	2.01724	1.74667	1.11454	3.0436	1.90831	2.1486	1.63109	1.35654	0.249083	1.98031	1.11965	0.271454	0.468875	-5.74632
CRADD	3.39998	3.27038	3.02708	3.20992	3.54153	3.1176	3.20155	2.72456	3.01949	3.20125	3.18904	3.66944	3.02991	3.22081	3.21565	2.92003	3.33641	2.99066	3.17103	3.16946	3.19971	3.34324	3.24668	3.04333	2.71927	3.25281	3.24429	2.89195	3.17876	0.0728685	3.16365	0.891601	0.379469	0.576599	-5.96857
CRBN	2.91462	2.90656	3.23928	3.33236	3.46277	3.28325	2.93663	3.26923	3.10686	3.24321	3.26154	3.45974	2.24915	3.15759	2.78972	3.22498	3.05901	2.82636	2.93327	2.9962	2.99348	3.02002	3.0664	3.26632	2.98072	2.64474	2.83796	2.478	3.20482	0.174201	3.03948	1.72875	0.0937922	0.242049	-4.93408
CREB1	2.02826	2.17091	2.32795	2.17191	2.18742	2.24001	2.80639	2.68046	2.49188	2.3865	2.42447	2.68863	2.0587	2.13526	1.9216	1.99406	2.07097	2.28726	2.59074	2.22122	2.52083	2.24001	2.24872	2.35179	2.55365	2.55728	2.58325	2.55763	3.04154	-0.198002	2.36343	-2.06894	0.0469685	0.152543	-4.35655
CREB3L2	2.69991	3.04187	3.20318	3.3835	3.36418	3.33848	3.23316	3.26004	3.84792	3.58202	3.56511	2.79716	3.28024	3.043	3.17045	3.31588	3.06474	2.76526	3.19971	3.00996	2.95641	3.13017	2.98361	2.51823	2.53852	3.16331	2.90763	2.82065	2.34666	0.384843	3.08728	3.68772	0.000861999	0.0132914	-0.744989
CREB5	2.81285	2.75712	2.31331	2.11624	2.10508	2.02342	2.03125	1.29657	2.30078	2.28105	2.19678	2.17531	2.61908	2.34442	3.16975	2.58536	2.28157	2.15032	2.24666	2.00729	1.88744	2.05201	2.58737	2.77851	2.43391	1.99406	1.84547	2.81414	2.03218	0.0824523	2.28411	0.592526	0.557792	0.719077	-6.18682
CREBBP	2.42479	2.89854	2.7621	2.87293	2.62057	2.73103	2.89195	3.13651	3.25905	3.14833	2.65349	2.90172	2.52607	1.85091	1.7873	2.20273	2.24992	2.9408	2.8642	2.72786	2.82896	2.36971	2.03125	2.41166	3.58281	2.85653	3.02429	3.91516	3.14868	-0.249594	2.74551	-1.49185	0.145835	0.318477	-5.28588
CREBL2	2.8311	2.84129	2.99651	3.0661	3.32634	3.00073	2.78614	3.69135	3.42644	3.57286	3.39141	3.22629	3.54224	2.52662	2.96853	2.83478	2.50529	2.9443	2.91262	3.01979	2.91922	2.4231	2.55905	2.90848	2.49548	2.55011	2.53917	2.78389	2.34015	0.390621	2.9286	3.34157	0.00218247	0.0219982	-1.60657
CREBZF	2.46315	2.41524	2.0446	2.19537	2.2439	2.07162	2.2439	2.33769	2.51544	2.36689	2.1852	2.09876	2.5294	2.478	2.52005	2.3318	2.4667	1.87062	2.03506	1.92511	2.54295	2.16758	2.19537	2.42661	2.57603	2.19374	2.03566	2.03967	2.2081	0.139276	2.26635	1.79748	0.0819967	0.22214	-4.82403
CREG1	3.62819	3.28176	3.52969	3.37198	3.58542	3.38696	3.39998	3.91799	3.29927	3.88513	3.6505	3.25965	3.31705	3.2974	3.32634	3.3	3.5323	3.7288	3.40684	3.27884	3.13685	3.20125	3.19168	3.07706	3.01412	2.96936	3.0587	2.7702	3.34973	0.286848	3.35011	3.30066	0.00243089	0.0235814	-1.706
CRIM1	3.61294	3.54547	2.63584	2.53445	2.53254	2.42447	2.33532	3.64652	3.88958	3.35338	4.49197	4.05919	1.97855	2.29522	2.07433	2.05635	2.20525	2.65033	2.52041	2.24915	2.73897	2.321	2.27259	2.51129	3.05365	2.35145	2.06341	2.91611	1.6425	0.480941	2.72284	2.01548	0.0525857	0.164894	-4.45262
CRIP2	4.69158	4.38278	4.17591	4.35655	4.34628	4.03691	4.8958	3.18937	2.65141	3.397	3.21438	3.67446	4.66736	4.66043	4.66043	4.74539	4.88255	4.31973	4.38741	4.8958	4.36831	4.65272	5.14564	4.53306	4.04866	4.05058	4.67629	4.03893	4.29577	-0.296452	4.27729	-1.4485	0.157507	0.333922	-5.34547
CRIPT	1.8905	2.32424	2.09068	1.89822	2.23412	2.00729	1.99406	2.01341	2.17142	2.09068	2.25763	2.45893	1.67353	2.39284	2.09749	2.07844	2.18742	2.33486	1.9844	2.58325	2.11225	2.33891	2.29002	2.57429	2.62024	2.25095	2.74058	1.86389	2.69845	-0.256543	2.21562	-2.81901	0.00831502	0.0503238	-2.82945
CRKL	2.64589	2.43292	2.56798	2.4031	2.36224	2.4167	2.70365	3.08261	2.83503	2.78444	2.6649	2.39211	1.36459	2.42696	2.21721	2.26422	2.32748	2.50498	2.41917	2.3704	2.47493	2.73283	2.5135	2.67602	3.01573	2.79535	2.87492	2.6097	2.54925	-0.163826	2.53203	-1.43551	0.161145	0.338361	-5.36302
CRLF1	3.3996	2.29573	2.66269	3.47344	2.4149	2.3559	4.01759	2.90307	2.31331	2.11682	4.36397	0.760648	3.55859	2.38988	1.3162	0.710733	3.88958	1.85606	1.62371	2.80293	1.85701	2.48597	4.4444	1.89224	2.94132	2.70337	2.65907	3.31846	3.15983	-0.00167804	2.64438	-0.0049027	0.99612	0.997583	-6.3617
CRLF3	2.60137	2.48129	2.55728	2.68224	2.84787	2.91329	2.40191	3.6115	3.69559	3.27801	3.39658	2.28105	2.87591	2.35998	2.80532	3.14897	2.43803	2.87615	3.28782	2.68983	2.62341	2.51482	2.2553	2.42203	2.56798	2.4667	2.40107	2.7824	2.21808	0.253525	2.74075	1.79048	0.0831377	0.224542	-4.8354
CRNKL1	2.89168	2.83871	3.10172	2.64589	2.94758	2.79562	2.8238	3.17217	3.19971	3.2867	3.38994	3.51061	2.12141	2.44484	2.51823	2.42661	2.39467	2.50274	2.28033	2.45366	2.6442	2.61133	2.14068	3.0123	2.82065	2.56513	2.57808	2.3505	2.75736	0.293776	2.73196	2.35535	0.0250054	0.103048	-3.81092
CROT	2.90464	2.76383	2.97629	3.21681	3.2303	3.00461	3.14511	3.16399	3.00346	2.98338	3.78212	2.8839	3.07956	3.46434	3.42357	2.62116	3.24466	2.97681	3.02323	2.88935	2.88902	2.95425	2.9369	3.34324	2.23316	2.30716	2.88159	2.12317	3.18503	0.299369	2.9874	2.49256	0.0182286	0.0836002	-3.53228
CRTAP	2.92941	2.48624	2.55135	3.00596	2.85015	2.6559	2.45893	2.14233	2.13174	2.64249	2.46027	2.19774	3.10658	2.72999	2.78211	2.20108	2.6326	2.718	2.73897	2.64675	2.61105	2.34756	2.8995	2.87615	2.18804	3.31705	2.95582	3.20155	2.74522	-0.184303	2.66243	-1.60868	0.117814	0.278316	-5.11783
CRTC3	2.66437	2.56449	2.72168	2.8114	2.84349	2.80822	2.62281	2.72546	2.52729	2.75712	2.51724	2.5034	2.83821	2.92984	2.8311	2.78107	2.49943	2.47653	2.61345	2.72249	2.43427	2.36186	2.70015	2.74607	2.69523	2.47465	2.54954	2.62189	2.65189	0.115406	2.65499	1.91537	0.064701	0.190402	-4.62732
CRY1	2.44554	2.42479	1.9607	1.46053	2.05952	1.61804	1.88307	1.83701	2.15569	2.21766	1.66524	2.0462	1.44282	1.45315	2.0652	1.22521	1.52372	2.09204	1.97469	1.72085	2.01803	2.40231	2.12567	2.22081	3.07984	3.19971	2.09876	3.56154	2.48733	-0.563127	2.08502	-3.4086	0.0018274	0.0196545	-1.44251
CRYAB	6.01864	5.86745	6.19754	6.19754	6.29752	6.29752	6.19754	5.17148	5.17148	5.20097	5.51918	5.73277	5.56279	6.19754	6.10864	5.94051	6.19754	6.19754	6.10864	6.19754	6.29752	6.19754	6.01864	6.29752	5.37873	5.41546	6.10864	5.30508	5.94051	-0.0801829	5.90828	-0.561019	0.578814	0.734187	-6.20483
CRYBG1	2.13468	1.97469	2.36478	2.25997	2.48129	2.24049	2.19941	4.19649	4.13815	3.45974	3.36532	2.61615	3.6526	2.34551	4.15479	2.96936	2.56365	2.7352	2.79429	2.05706	2.30607	2.25095	1.70699	1.39912	1.38329	1.78636	1.52372	1.72807	1.5038	0.957995	2.49283	3.98305	0.000382412	0.00780779	0.0143012
CRYBG3	3.39098	3.66688	3.27523	3.27304	3.46536	3.3835	3.32052	3.50772	3.52716	3.25773	3.67372	3.57472	2.75991	2.87179	2.70732	2.62696	3.18608	3.0938	3.3794	3.19097	3.41189	3.16199	2.87975	3.42933	3.60744	2.84815	3.05338	3.24701	4.08328	-0.0193395	3.27086	-0.156753	0.876455	0.93211	-6.3494
CRYL1	2.4167	2.53254	2.56055	2.68516	2.8863	2.82838	2.82198	2.89115	2.50079	2.67811	2.29707	2.76465	3.27523	2.8702	2.90683	2.42874	3.28408	2.7609	3.03479	2.8882	2.65243	2.61969	2.95449	2.85384	2.3704	2.90337	2.7602	2.24049	2.53315	0.0285201	2.73105	0.286212	0.776618	0.870483	-6.32072
CRYM	4.30958	4.28937	4.81824	4.8549	4.35655	5.14564	4.34946	3.69829	4.23753	4.56512	4.74539	4.95646	4.05919	4.82954	4.30238	4.8958	4.82954	4.31263	3.68957	3.9465	4.4444	4.62906	4.48118	4.42678	2.54889	3.02259	3.62045	3.49432	3.9654	0.66189	4.26982	3.66208	0.000924272	0.0137331	-0.80994
CRYZ	3.20063	3.1469	2.99274	3.20539	3.56233	2.87817	2.8272	2.92561	2.78945	3.12412	2.77209	3.02681	2.95757	3.47661	3.45498	2.90621	3.57661	3.13198	3.40917	3.17289	2.69225	3.05901	2.87	3.55273	2.84707	2.89604	3.2202	1.96924	3.48064	0.0821596	3.07326	0.651258	0.519674	0.691335	-6.15068
CSAD	1.91231	2.03726	2.03046	2.02179	1.93516	2.35145	1.93237	2.30207	2.71162	2.35955	2.06721	1.84451	2.57045	2.37441	2.3822	2.89326	2.49983	2.00402	2.26705	2.05345	2.15734	1.76101	1.67991	2.41269	1.94078	1.81489	2.2778	1.69654	2.22175	0.224647	2.15562	2.10293	0.043679	0.145766	-4.2945
CSDC2	4.16577	3.45658	3.3412	3.60386	3.02031	3.64237	4.43545	1.88862	2.57363	2.9425	2.59017	2.22924	4.03498	4.62019	4.10868	3.95577	3.62913	3.58079	2.63006	4.51691	4.05058	3.72519	4.52242	3.5179	2.8834	3.43968	4.49691	3.79033	4.09826	-0.345245	3.56865	-1.34899	0.187103	0.369531	-5.47643
CSDE1	3.97041	3.91127	4.02411	3.88363	3.9167	4.00982	3.95072	4.08171	3.99185	3.70248	4.24022	4.28937	3.18809	3.55029	3.26881	3.33286	3.85564	4.12491	3.92888	3.94929	4.16343	4.22356	3.17954	3.4986	3.94057	3.62463	4.1869	3.8956	4.72833	-0.120276	3.88318	-0.925804	0.361692	0.558635	-5.93826
CSE1L	2.31791	2.63533	2.53193	2.35223	2.51911	2.3975	2.4853	2.29798	1.79447	2.28768	2.00805	2.19426	2.65317	2.76962	2.58067	2.60082	2.87975	2.5097	2.37281	2.4488	2.13112	2.42597	3.01052	2.60331	2.71007	2.31896	2.50408	2.37079	2.57808	-0.0689327	2.45828	-0.717514	0.478424	0.659799	-6.10594
CSF1	3.19911	2.78685	3.2241	3.25905	2.95101	3.17788	3.0584	3.23535	2.8253	3.00857	2.88287	2.92247	3.74167	3.05809	3.2202	3.58662	2.71619	3.34006	3.20091	3.19561	3.1233	3.01745	3.27152	2.91025	2.59587	3.3295	2.75237	3.50624	2.54066	0.0437304	3.09095	0.40729	0.686591	0.811615	-6.27882
CSF1R	3.00747	2.47107	3.5145	3.73831	3.98965	3.68157	3.2476	5.04478	4.33568	4.94338	4.50718	4.4309	4.65272	2.82298	3.88654	4.29577	2.83347	3.82154	3.93324	2.77185	3.49432	3.29665	2.67718	2.51308	2.32306	2.46483	1.76533	2.44751	1.9592	1.05829	3.40936	3.98332	0.000382116	0.00780779	0.0150251
CSF2RB	1.74404	1.4923	2.43147	2.26471	2.38254	2.27078	1.82411	2.90656	2.36394	2.3227	3.28408	1.51813	2.20525	1.88647	2.03893	3.12444	2.11369	2.73824	3.02429	1.919	2.68075	2.19489	1.81951	2.44451	2.60543	2.65033	2.71672	2.01963	2.38835	-0.187934	2.3233	-1.14158	0.26236	0.459112	-5.72248
CSGALNACT1	3.10513	2.80609	2.8626	3.66023	3.87989	3.32555	3.66506	3.49544	3.12503	3.38618	2.8465	3.84453	3.0938	3.18866	3.36454	3.32995	3.63582	3.51394	4.02947	3.55479	3.41049	3.48156	3.1227	4.0191	3.1792	3.09756	3.47218	3.01688	3.23707	-0.0976173	3.37069	-0.791083	0.434901	0.623426	-6.05137
CSGALNACT2	2.39541	2.39648	1.89822	2.00307	2.36478	1.89725	1.86655	2.56481	2.59678	2.72375	2.74279	1.6425	2.04906	2.04906	2.08781	2.17191	1.93423	2.02277	1.93148	1.93788	2.0497	1.83701	1.99842	2.18999	2.11624	2.64182	2.05201	2.77268	1.68949	0.0957957	2.15945	0.802591	0.428315	0.617395	-6.04237
CSK	2.38447	2.57574	2.48923	2.57307	2.61796	2.8067	2.68819	3.38887	2.65544	2.45998	2.34968	2.41956	3.29155	2.67222	2.85952	2.95559	2.55966	2.7907	3.02565	2.90307	2.73493	2.88462	2.9443	2.4437	2.39064	2.48038	3.29962	2.49809	2.6602	-0.0636319	2.71736	-0.592133	0.558052	0.719229	-6.18705
CSNK1A1	3.20184	3.09357	3.22206	3.03586	3.04001	3.00262	3.06274	2.67939	2.11682	2.23784	2.82779	2.65268	3.09141	3.46693	3.27853	3.30896	3.23671	2.85849	3.09954	2.7917	2.87591	3.31271	3.04451	3.26481	3.15148	3.31385	2.71898	3.31463	2.7369	-0.0664238	3.00135	-0.559489	0.579845	0.735153	-6.20568
CSNK1G1	2.11478	2.11369	2.01963	2.01803	1.85701	1.71025	1.97	2.43147	2.64249	2.22322	2.60659	2.44787	1.90316	1.87623	1.9592	1.86389	1.87623	2.25763	1.99082	1.97543	2.60906	2.15913	1.95847	2.31371	2.35921	2.46165	2.46027	2.19537	2.17634	-0.146989	2.15692	-1.52205	0.138122	0.307296	-5.24348
CSNK1G2	2.46233	2.48957	2.29707	2.3877	2.28157	2.2439	2.58244	2.51609	2.4509	2.34666	2.19635	2.21808	2.33808	2.21142	2.43846	2.55042	2.53315	2.36881	2.50238	2.4031	2.40896	2.46788	2.557	2.07712	2.76383	2.85518	2.61226	2.83088	2.49878	-0.143894	2.4445	-2.03014	0.0509888	0.162007	-4.42646
CSNK1G3	2.92083	2.64351	2.4283	2.768	2.60249	2.53099	2.52145	2.85628	2.88052	2.65733	2.75682	2.46538	2.50238	2.34968	2.3542	2.37002	2.72856	2.44648	2.46456	2.40146	2.69039	2.48988	2.41789	2.89305	2.8311	2.40146	2.69579	2.73768	2.65115	0.0146383	2.60199	0.196283	0.845668	0.915703	-6.34242
CSNK2A1	2.91898	2.72331	2.82171	2.66295	2.50665	2.64867	2.87772	2.63419	2.88186	2.82975	3.13596	2.78107	2.52041	2.71404	2.38527	2.67579	2.39387	2.64646	2.59476	2.78741	2.83456	2.8476	2.47493	3.30411	3.01359	2.62219	2.92223	2.74309	2.68333	-0.077039	2.74436	-0.944355	0.352284	0.549201	-5.92137
CSNK2A2	2.92003	2.96298	2.74422	2.57658	2.65518	2.77294	3.16441	2.64729	2.46127	2.48827	2.277	2.75208	2.51236	2.80044	2.59187	2.24251	2.87921	2.57603	2.61556	2.6668	2.76293	2.72627	2.74897	3.12094	2.98386	2.83427	3.05136	3.05136	3.12066	-0.181468	2.74854	-2.06956	0.0469071	0.152525	-4.35544
CSPP1	2.08419	2.10448	2.02342	2.05706	1.87528	1.93516	1.91729	1.82788	2.06965	1.15273	1.73236	1.9567	2.51823	2.21661	2.51724	2.33267	2.44854	2.02826	2.01263	2.17837	1.9361	2.00075	2.33086	2.56481	2.29398	2.02557	2.1759	2.28288	2.45403	-0.145081	2.1053	-1.36261	0.182812	0.363557	-5.45898
CSRNP2	2.64808	2.65189	2.65456	2.74753	2.38447	2.41994	2.82223	2.36517	1.87062	1.7799	2.1187	2.14469	3.0684	2.99221	2.92842	2.96488	2.88652	2.47681	2.54811	2.43147	2.53618	2.61615	2.82223	2.64779	2.69089	2.36517	2.76556	2.87567	2.85711	-0.0803164	2.58901	-0.669142	0.508353	0.682771	-6.13902
CSRP2	2.33486	2.59709	2.80609	2.90656	2.7917	2.99274	3.06748	3.08712	2.71504	1.89529	2.26325	2.55072	2.4664	2.52763	2.41166	2.10195	2.84913	2.87567	2.9718	3.03188	2.48957	3.05412	2.8465	2.86579	4.05739	2.99864	2.80071	3.05338	3.91008	-0.46994	2.80415	-3.31492	0.00234137	0.0232714	-1.6714
CSRP3	6.10864	6.01864	5.73277	5.86745	6.19754	6.01864	5.68045	5.51918	5.37873	5.17148	5.37873	5.56279	5.02671	5.20097	5.41546	5.33634	4.92512	6.01864	5.94051	5.94051	6.10864	5.86745	5.79593	5.79593	5.61375	5.56279	5.37873	6.01864	5.23293	-0.211714	5.64876	-1.67334	0.104314	0.257138	-5.02025
CST3	3.47582	3.41724	3.90258	4.23223	4.14905	3.72613	4.06692	3.74738	3.82335	3.99185	3.36042	3.40731	3.9588	3.81923	3.57104	3.57661	3.60596	3.97372	4.45928	4.09415	3.99524	3.93619	3.51341	4.03691	3.77023	3.91516	4.10868	3.85717	3.62819	-0.185873	3.83173	-1.88502	0.0688221	0.198565	-4.6789
CSTA	1.62157	1.5038	1.93045	2.00729	2.06277	2.07037	1.92674	4.52731	3.46952	3.96884	2.78471	2.70248	3.195	1.42906	2.87128	2.39946	1.45633	2.03804	2.74197	1.96576	2.1841	1.83789	1.91982	0.65695	1.40386	1.96576	2.68195	1.63331	1.4116	0.596209	2.21959	2.13382	0.0408677	0.139022	-4.23745
CSTB	3.41229	3.63295	4.14249	3.87172	4.13102	4.17895	4.02411	3.77351	3.66688	3.82899	3.58144	3.47486	4.06115	4.00798	4.03102	3.70708	3.82665	4.23489	4.21977	3.95729	4.0118	3.91008	4.32624	3.99524	3.49643	3.45248	4.36397	3.15398	3.47435	-0.0387469	3.86033	-0.332914	0.741438	0.843887	-6.30628
CSTF1	1.97941	2.01575	1.97618	1.919	1.93878	1.81128	1.99082	2.20972	1.9567	2.31666	2.24434	2.4704	1.57382	1.98768	1.68949	1.78514	1.9102	2.00153	1.98134	2.04296	2.03125	2.17944	2.18742	2.08994	2.61586	2.37649	2.26193	2.50906	2.26374	-0.224959	2.07987	-2.65405	0.0124312	0.0647926	-3.19126
CSTF2T	2.96773	2.99221	3.04132	2.66543	2.75045	2.77472	2.82271	2.8144	2.75634	2.7961	3.16975	3.12955	2.63533	2.85355	2.84155	2.9408	2.69964	3.08042	2.89195	2.67195	2.98151	3.08456	2.94834	2.86492	3.07373	3.00073	2.60331	2.6955	2.95158	-0.0421834	2.87931	-0.624443	0.536901	0.704131	-6.16759
CSTF3	2.62313	2.41001	2.6624	2.947	3.23671	2.68019	2.65518	3.09986	2.91052	2.94375	2.9672	3.07373	2.56607	2.43327	2.69464	2.58573	2.45583	2.51378	2.93517	2.71722	2.65317	2.42729	2.49021	2.63927	2.80921	2.83701	2.72202	2.62977	2.52763	0.103004	2.71886	1.21058	0.235195	0.427507	-5.64474
CTAGE1	1.63109	1.39912	1.18037	1.74091	1.73118	1.59178	1.61599	1.59178	1.68771	1.61599	1.78221	1.61599	2.01654	2.242	2.23821	2.07097	2.1656	1.89147	1.70532	1.76998	1.62157	1.70326	2.28157	1.92595	1.82411	1.98279	1.99616	1.90229	1.95526	-0.120128	1.80956	-1.24275	0.22327	0.413149	-5.60708
CTBP1	3.33087	3.60527	3.51607	2.91535	3.01359	3.12291	3.397	2.90337	3.16566	3.08606	2.87817	3.11081	3.43452	3.44642	3.39048	3.374	3.37633	3.37809	3.65125	3.09719	3.43172	3.6115	3.39581	3.30999	3.10014	3.17586	3.32873	3.05746	3.26237	-0.0774464	3.27128	-0.917411	0.366003	0.562677	-5.9458
CTBP2	2.74776	2.89495	2.96517	3.10205	3.22587	3.03014	3.06727	2.81062	2.86678	2.79535	2.71241	2.69629	3.17183	3.02964	2.86749	2.96853	3.03221	3.02505	3.14207	3.03742	2.95208	2.8163	2.80293	2.73824	3.08663	3.11734	3.16331	3.1745	3.02505	-0.0664852	2.96777	-1.00666	0.321881	0.521542	-5.86232
CTBS	2.09335	1.94629	2.07778	2.15982	1.94723	2.09749	2.08914	2.76671	2.43292	2.58713	2.4827	2.11751	2.47363	2.0652	2.16613	2.03435	2.30159	2.2594	2.2594	2.34887	2.10003	1.97855	2.34551	1.89529	1.94629	2.54867	2.24728	2.04574	2.24434	0.0408753	2.20891	0.472926	0.639576	0.779055	-6.25006
CTCF	2.37649	2.98151	2.74633	2.7753	2.89665	2.81341	2.75264	2.57429	2.58602	2.4667	2.18742	2.79048	3.43225	2.98072	3.11359	3.01443	2.75904	2.77151	2.92542	2.72546	2.65349	2.82144	2.85384	2.97931	2.37765	2.4509	2.74776	2.91132	2.86375	0.0224301	2.76997	0.230698	0.819064	0.898121	-6.33507
CTDNEP1	3.30518	3.39098	3.40311	3.195	3.32251	3.55736	3.2974	3.09719	2.83891	2.93738	2.82117	3.08456	3.43363	3.60865	3.50772	3.45596	3.2287	3.46084	3.34239	3.52279	3.47435	3.37979	3.59763	3.44579	3.31543	3.08133	3.43596	3.01771	3.36042	-0.10569	3.30758	-1.25732	0.218019	0.408541	-5.58973
CTDSP1	3.83619	3.67798	3.48947	3.81923	3.61509	3.85717	3.84107	3.63295	3.59428	3.87872	3.73052	3.65661	3.68255	3.6505	3.64237	3.72693	3.79589	3.8911	3.89841	3.82053	3.44265	3.52643	3.48108	3.67111	2.99941	3.40609	3.49483	3.15983	3.36578	0.200279	3.63051	2.55861	0.0156078	0.0752515	-3.39443
CTDSP2	3.5316	3.2003	3.1923	3.49223	3.25183	3.30551	3.55405	3.29629	3.31385	3.26042	3.12291	3.27954	2.84628	3.3313	3.12619	3.22834	3.36946	3.55029	3.53838	3.32788	3.62328	3.26266	3.28451	3.20482	3.34523	3.46084	3.397	3.45452	3.2707	-0.116733	3.32491	-1.77059	0.086454	0.230176	-4.86752
CTDSPL	2.81389	3.2287	2.99561	3.30629	3.22739	3.45038	3.16687	2.7969	2.92595	3.26197	3.40434	3.12649	3.10049	2.99864	2.83821	3.31159	2.87752	3.2685	2.83088	3.00622	3.22703	3.37198	3.06935	2.87642	2.96245	2.8839	3.7652	2.86873	3.24282	-0.00673805	3.11051	-0.0732945	0.942042	0.967959	-6.35902
CTH	1.38753	1.15273	1.12602	1.56931	1.47945	1.64594	1.43957	1.42497	1.85808	1.69984	1.67991	1.52372	1.34755	1.86849	1.4153	1.39089	1.7148	1.22521	1.49805	1.76217	1.51813	1.46053	1.90446	1.99518	3.16818	2.18247	2.08003	1.37954	2.15094	-0.347226	1.65686	-2.54719	0.0160345	0.0762967	-3.41843
CTIF	3.30299	2.83189	2.53587	2.62473	2.62141	2.58268	2.7087	2.16278	2.31455	2.04129	1.91808	2.21982	2.91411	2.56365	2.88261	3.4469	3.52103	2.74661	2.47623	2.71983	2.51308	2.8243	3.47714	2.88543	2.66873	2.63927	2.72786	2.54295	2.91002	-0.102537	2.70085	-0.71229	0.481607	0.661845	-6.10962
CTNNA1	3.5145	3.44579	3.46952	3.38784	3.32788	3.54728	3.47261	2.74106	2.75553	3.14795	3.01336	3.10803	3.37535	3.48428	3.09662	3.1469	3.56031	3.32206	3.47535	3.71637	3.57609	3.43826	3.47661	3.23707	3.73928	3.70079	3.41319	3.78002	3.55273	-0.265368	3.38009	-2.97348	0.00565263	0.0397214	-2.47934
CTNNAL1	3.40161	3.39581	3.24282	3.60934	3.60322	3.65954	3.67111	2.80822	3.20223	2.84078	3.82434	3.19702	2.87843	3.28325	3.05669	3.38217	3.63433	3.31705	3.23316	3.58662	3.59162	3.5521	3.24868	3.26583	3.99684	2.84787	3.96332	3.74807	3.69914	-0.169434	3.40487	-1.42293	0.164732	0.342725	-5.37989
CTNNB1	4.29577	4.4444	3.90128	3.23633	3.27304	3.37248	3.91008	3.55736	3.51061	3.80245	3.3954	3.65757	3.09897	3.25156	3.35008	3.22771	3.14207	3.4827	3.55079	3.38742	3.56697	3.93324	3.37809	3.63003	4.02259	4.01581	3.39581	3.81817	3.43596	-0.08026	3.58775	-0.633718	0.530908	0.698453	-6.16182
CTNNBIP1	3.2458	2.96991	2.85577	3.20445	3.04941	3.3004	3.22341	2.98918	2.77445	2.62696	2.61759	3.07059	3.01892	3.2192	3.20539	3.38518	3.15432	3.23108	3.25183	3.67111	3.20669	3.32366	3.3313	3.30896	2.68224	3.21113	3.57731	3.3	3.28894	-0.228437	3.14811	-2.5548	0.015749	0.0755607	-3.40245
CTNNBL1	2.54889	2.68019	2.63233	2.73824	2.59245	2.53445	2.64284	2.64559	2.38152	2.57216	2.45125	2.82117	2.54584	2.75712	2.51609	2.70157	2.63419	2.83236	2.62529	3.05948	2.57603	2.74197	2.84449	2.75157	2.52362	2.75789	3.31886	2.64559	2.80714	-0.178836	2.68552	-2.59919	0.0141752	0.0706036	-3.30863
CTNND2	2.34708	2.74552	2.39946	2.44154	2.19729	1.78331	2.44088	1.04408	1.09082	2.60906	2.46088	2.12687	1.80483	2.15477	2.6075	2.6028	2.81984	2.10508	1.38329	2.14686	2.53667	2.69089	2.65054	2.75964	1.67991	2.38835	3.14737	2.78058	3.63582	-0.275818	2.3304	-1.37719	0.178308	0.35839	-5.44014
CTPS1	2.49292	2.44299	2.22876	2.54543	2.67008	2.48695	2.26992	2.76776	2.33891	2.48695	2.89693	1.9361	2.04129	2.36224	1.93788	2.25679	2.04378	2.35811	2.23259	2.3318	2.32515	2.5475	2.99915	2.02741	3.09292	3.40567	2.57749	2.77094	2.02557	-0.192819	2.44483	-1.50057	0.143573	0.314758	-5.27371
CTPS2	1.80483	1.83269	1.84342	1.63722	1.71781	1.74907	1.8519	1.99011	2.14573	2.26992	2.13404	2.41001	1.56403	1.74526	1.87736	1.5038	1.64419	1.70532	1.87849	1.78514	1.68321	1.78107	1.73947	2.34968	2.07365	2.21808	2.28033	1.86515	2.28431	-0.104358	1.90915	-1.08586	0.285904	0.484323	-5.78221
CTR9	2.94594	2.90819	2.78533	2.718	2.87519	2.74753	2.66358	2.86065	2.60464	2.61379	2.75371	2.96245	2.85323	2.75553	2.65733	2.59742	2.91497	2.72331	2.97349	2.4755	2.73132	3.04028	2.66414	2.67117	2.80945	2.71241	2.87702	3.10376	2.98888	-0.0367291	2.7927	-0.5638	0.576942	0.73321	-6.20328
CTRL	2.58653	2.26288	2.45583	2.64121	2.30288	2.62584	2.41001	2.7917	2.44407	2.53819	3.49791	2.61644	2.71619	2.66161	2.78058	3.31349	1.87849	2.76556	2.57864	2.72917	2.80714	2.76409	2.25893	1.79698	2.2321	3.1185	2.34802	3.67977	2.11817	0.0192946	2.61107	0.124379	0.901817	0.947151	-6.35396
CTSA	3.22176	2.97961	3.61988	3.52895	3.47218	3.59367	3.60121	3.24282	2.62189	3.192	3.11943	3.16111	3.60386	3.77251	3.34608	3.60195	3.51504	3.64507	3.58356	3.48064	3.63433	3.53441	3.71537	3.35929	3.23671	3.07546	3.54728	3.22307	3.42877	-0.0909793	3.402	-0.925258	0.361972	0.558843	-5.93875
CTSB	3.39275	3.14424	4.18386	3.57044	3.68594	3.85315	3.98163	4.47207	3.79589	3.59835	3.72784	3.28451	3.70079	3.67615	2.84402	4.45928	3.57896	4.48118	3.96884	3.73141	3.67446	3.7937	4.00982	2.75022	3.79237	3.05198	4.03691	3.39623	3.30584	0.0368519	3.68768	0.229207	0.820212	0.898477	-6.33541
CTSF	3.14922	3.17479	3.43503	3.43408	3.59091	3.5123	3.49643	2.78029	3.24214	3.16497	3.38478	3.09986	3.50573	3.35008	2.84988	3.21953	3.56511	3.07706	3.31159	3.25183	3.06876	3.2855	3.24466	3.3313	2.76185	2.84628	3.81424	3.02169	3.34365	0.0949446	3.25219	0.984292	0.332585	0.53122	-5.88393
CTSH	2.81085	3.0305	3.23777	3.18704	3.37305	3.26481	3.01202	4.00505	3.42315	3.68878	3.16912	2.98747	3.48601	3.03682	3.53569	2.83968	3.15525	2.27953	3.20601	2.82249	2.74172	3.24701	2.56422	3.22587	2.05422	2.17035	2.60024	2.64808	2.80128	0.552839	3.02083	4.29596	0.000159204	0.00471839	0.837034
CTSL	2.75712	2.86176	3.12175	3.27152	3.10288	3.12147	2.98262	3.20791	3.397	3.06811	2.94887	3.08042	2.97657	2.64219	2.85869	2.78533	2.72168	3.2458	3.25082	3.28894	2.89883	2.95975	2.85897	2.63477	3.39454	3.24282	2.98663	3.45038	2.9443	-0.101916	3.03664	-1.16687	0.252154	0.447444	-5.69448
CTSO	2.91762	2.73742	3.10259	3.32052	3.45295	3.0395	3.12779	3.90761	3.90602	4.03102	3.75598	3.69914	2.68923	2.60024	2.96461	3.04629	2.91262	3.00885	3.38518	2.88083	3.01745	2.93577	2.89927	2.69112	2.59901	3.2339	2.11751	2.87371	2.17191	0.429839	3.06985	2.76369	0.00952672	0.0547603	-2.95222
CTSZ	2.5809	2.92595	3.2814	2.9672	3.19296	2.83701	3.09897	4.02575	3.38142	3.54285	3.69994	2.80344	2.16498	2.56422	2.01724	2.71265	2.85464	3.14272	3.42315	2.77583	2.68224	3.05388	2.76585	1.60202	2.70819	3.71073	3.57541	3.06415	3.28931	-0.00328777	2.98086	-0.0171963	0.98639	0.991298	-6.36156
CTTN	3.28451	3.0745	2.89883	3.17012	2.69464	3.12745	2.97844	2.46315	3.03655	2.59562	2.8292	2.91132	3.21396	3.24834	3.37198	3.04028	2.85577	3.00691	3.12473	3.01573	3.01336	3.32099	3.22703	3.02291	2.68385	3.73526	2.19729	3.21565	3.1923	-0.0750793	3.01899	-0.664224	0.511453	0.685414	-6.14226
CUEDC2	3.39232	3.20601	3.31627	3.36988	3.18503	3.3448	3.39187	2.72331	2.19598	2.57685	2.41373	3.13113	3.44747	3.84228	3.65501	3.59162	3.83013	3.46434	3.50889	3.39875	3.32366	3.28823	3.87172	3.6771	2.69845	3.06274	3.44134	3.04629	3.35241	-0.131923	3.26716	-0.87608	0.387718	0.58204	-5.98197
CUL1	2.8849	3.14297	2.80639	2.74058	2.9171	2.87446	2.87615	2.78471	2.778	2.72354	2.66133	2.92003	2.51783	2.85869	2.29522	2.48827	2.69039	2.66184	2.69464	2.90145	2.90337	3.00857	2.81761	2.92168	3.11023	3.01359	3.15432	3.16851	3.15525	-0.196868	2.84385	-2.59423	0.0143436	0.0712994	-3.31916
CUL2	2.19374	2.28609	2.26422	2.16278	2.23064	2.24579	2.277	2.32795	2.1372	2.08914	2.30029	2.69607	2.16092	2.32707	2.14012	2.29659	2.31545	2.24483	2.16613	2.14928	2.24525	2.4134	2.48565	3.13434	2.36971	1.88862	2.25893	2.20917	2.64867	-0.0893369	2.29879	-1.02461	0.313469	0.513781	-5.84467
CUL3	2.72727	2.98493	2.82009	2.54066	2.61854	2.63637	2.98318	3.02587	2.6639	2.72786	2.71775	3.01181	2.36478	2.7961	2.42519	2.36262	2.8126	2.67148	2.57517	2.98262	2.82036	2.87446	2.53413	3.04912	2.97322	2.94375	2.61281	2.89604	3.06139	-0.114085	2.766	-1.40903	0.16877	0.347941	-5.39839
CUL4A	3.00346	3.41319	3.19598	3.14897	3.16399	3.09986	3.04391	2.77976	3.07204	2.87446	3.03835	3.6005	2.8163	3.08107	2.8149	2.88777	2.71241	3.21647	3.07373	2.95208	3.18071	3.23075	2.91104	3.6526	3.08824	2.84913	3.07263	3.18839	3.58467	-0.122766	3.09474	-1.35259	0.18596	0.368206	-5.47182
CUL4B	2.69279	2.4978	2.7611	2.64351	2.58013	2.5097	2.85818	2.87396	2.80794	2.63365	2.98361	2.27172	3.0254	2.7876	2.74832	2.92595	2.8362	2.41818	2.51129	2.44484	2.65652	2.67778	2.4729	2.80559	2.36881	2.38614	2.50467	2.19941	2.58602	0.228943	2.63689	3.09339	0.00416523	0.0331093	-2.20063
CUL5	2.72786	2.90683	2.79048	2.68547	2.81202	2.72168	2.87492	2.83871	2.78135	2.75157	2.91236	3.13712	2.7492	2.8144	2.68612	2.67376	2.7686	2.81313	2.64779	2.8465	2.8042	2.9022	2.80559	2.84477	2.93761	2.67117	2.72546	2.47867	2.95025	0.0162975	2.79516	0.285199	0.777387	0.870807	-6.32101
CUTA	3.30188	3.27773	3.3954	3.21088	3.29962	3.48893	3.39581	3.07792	3.0376	2.7979	3.00179	3.14449	3.11452	3.1688	3.23707	3.32499	3.27413	3.2476	3.60322	3.23535	3.03554	3.3295	3.55608	3.19032	2.78714	3.47103	3.60262	3.31113	3.12927	-0.082774	3.24304	-1.02398	0.313761	0.51395	-5.84529
CUTC	3.23535	3.07148	2.98947	3.04333	2.88849	2.97271	3.14079	2.3958	3.12595	2.87702	2.69358	2.91159	2.94676	3.17693	2.7621	2.86818	2.89829	3.39741	3.31808	3.48792	3.51341	3.71537	3.42357	3.28856	3.27654	3.33641	3.46735	3.56095	3.87734	-0.530861	3.16071	-6.84364	1.14e-07	7.74e-05	7.68173
CUX1	3.57346	3.70503	3.51676	3.44134	3.38518	3.56233	3.46182	2.7876	2.91732	3.03221	3.09817	2.9672	3.58202	3.55918	3.68255	3.60934	3.83114	3.16592	3.36875	3.35495	3.37771	3.47962	3.43028	3.48704	3.24362	3.17753	3.12896	3.39496	3.38217	0.0622358	3.36911	0.64535	0.523444	0.693325	-6.15447
CX3CL1	2.81366	2.77497	3.07204	2.90199	2.89005	2.93973	2.90869	2.60931	2.80071	2.85409	3.41776	3.26999	2.57216	2.5809	3.80141	3.7969	2.94187	2.91025	3.31038	2.94783	3.10856	2.73945	2.76526	2.5498	2.63903	3.12382	2.36929	3.20223	2.41133	0.157067	2.93184	1.2235	0.230349	0.421861	-5.62972
CXCL1	1.85808	2.02106	1.9932	2.0652	2.09129	2.09068	1.87399	1.93878	2.9898	0.79966	3.29285	2.80293	1.37954	1.55228	0.94637	2.34442	1.43299	2.03506	2.14799	2.28203	2.16278	2.28157	2.31331	1.18753	4.49197	3.73831	2.24251	3.87614	1.6589	-0.565835	2.20315	-1.98803	0.0556919	0.172342	-4.5012
CXCL11	0.872996	0.872996	0.65695	0.65695	0.65695	0.760648	0.266263	4.16806	2.93456	4.37215	5.14564	2.40792	2.47653	1.00386	2.95312	4.01581	0.760648	1.82289	0.924913	0.898405	1.20874	0.924913	-0.909001	0.266263	0.898405	1.65692	0.502529	2.58573	-0.185339	1.17482	1.57164	2.42813	0.0211683	0.0921234	-3.66443
CXCL12	3.22307	3.40951	4.20113	3.82665	3.81923	3.57541	3.66183	4.67629	4.32624	4.24648	3.43551	4.31593	3.63295	3.24466	3.09227	3.88818	3.87734	4.18386	4.94338	3.7969	3.70248	4.04866	3.54085	3.16331	4.18938	4.26861	2.8476	2.82478	3.25867	0.0606282	3.76625	0.317123	0.753274	0.853439	-6.31141
CXCL2	2.34756	2.87492	1.83511	2.08156	3.27231	2.2799	2.17783	1.26611	4.25237	1.00386	2.06898	2.7047	1.88862	2.6326	2.18573	2.85985	2.27821	3.07233	2.87237	2.00307	4.7882	3.09082	2.74028	1.53101	4.73762	3.54285	3.53569	4.52731	2.78416	-0.915266	2.73227	-2.96801	0.00573127	0.0401704	-2.49191
CXCR4	0.710733	1.82411	0.11114	1.94348	4.45466	2.55434	1.32084	4.18185	4.46711	3.43363	3.50987	2.63791	3.64449	2.1083	4.27259	3.41189	1.92595	0.898405	1.46924	0.710733	1.74526	0.412194	0.65695	1.00386	1.36459	0.65695	1.01621	0.79966	1.01621	1.75686	2.00907	4.72016	4.77e-05	0.00252499	1.97273
CXXC1	3.8956	3.41189	3.56909	3.87037	3.49432	3.70503	3.74738	3.45196	3.64652	3.62328	3.31588	3.34693	3.91516	3.80245	3.72693	3.753	3.49277	3.84328	3.7937	3.63582	3.81183	3.47344	3.41508	3.58467	3.40647	2.99485	3.60195	3.37633	3.5467	0.0930997	3.59492	1.12492	0.269249	0.466545	-5.74063
CYB561	2.60721	2.32844	2.22649	2.51973	2.43147	2.44299	2.58737	3.17157	2.80559	2.46605	2.00954	2.41524	3.07204	2.5475	2.51636	2.73444	2.80945	2.5475	2.46972	2.53276	2.59271	2.42088	2.31864	2.14928	2.39648	2.07365	3.16051	2.32795	2.44953	0.116786	2.52176	1.10524	0.277551	0.475342	-5.76175
CYB5B	1.83053	1.97941	1.97058	1.72543	1.55228	1.67991	1.86389	2.10386	1.92595	1.95083	1.70141	1.97855	2.00892	2.14348	2.11421	1.77551	2.03726	1.8126	1.9102	1.7119	1.68161	2.07844	2.11225	2.33808	1.60819	2.29798	2.15532	2.30207	2.17142	-0.112535	1.94904	-1.35329	0.18574	0.367905	-5.47094
CYB5R1	4.43545	4.66736	4.35339	4.21977	4.00505	4.54079	4.58581	3.37031	3.49931	3.53668	3.85996	3.47435	4.02947	4.79923	4.20489	4.21462	4.0118	3.68502	2.93634	3.88654	3.97041	4.02259	4.08555	4.37215	3.43784	3.43408	3.71537	3.67111	4.05391	0.333792	3.96825	2.1965	0.0356531	0.126517	-4.11982
CYB5R3	3.92164	3.88818	4.16074	4.38741	4.28113	4.28937	4.11555	3.78922	3.69135	4.10868	3.63707	3.59763	3.97175	4.05218	4.03498	4.14031	4.28113	4.05058	4.04093	4.20113	4.11332	4.10414	3.90888	3.54966	3.8587	3.76926	4.53306	3.62748	3.7499	0.0615702	3.99501	0.63758	0.528424	0.697024	-6.1594
CYBB	2.2865	2.04296	3.01551	2.69845	2.66212	2.59332	2.34928	4.72833	4.0191	4.42678	4.24648	3.23609	3.64156	1.90144	2.90535	3.42051	1.3162	3.48658	2.67778	2.56671	2.68637	2.89574	2.84731	1.37019	1.86962	2.84301	1.37954	2.77851	1.62157	0.610244	2.77631	2.01815	0.0522918	0.164255	-4.44787
CYCS	4.72061	4.65272	4.80845	4.62019	4.42678	4.92512	4.38741	3.65339	4.25785	3.82665	4.34946	5.00987	3.75598	4.17591	4.06503	4.02259	4.06888	4.66736	4.51149	4.63567	4.84176	4.95646	4.55864	4.31593	4.50264	4.76685	4.69933	4.77837	4.82954	-0.335126	4.47555	-2.70215	0.0110679	0.0594075	-3.08711
CYFIP1	2.93517	3.04154	3.19168	3.43826	3.67446	3.50046	3.14399	3.88093	3.48658	3.62748	3.04629	3.422	3.36117	2.89634	3.08107	3.02991	3.16687	3.64449	3.74477	3.24935	3.45397	3.36042	3.34324	2.6295	3.52532	3.6226	2.61734	3.75791	2.85952	-0.027711	3.30112	-0.221319	0.826294	0.901878	-6.33719
CYFIP2	2.1692	2.59108	2.72143	2.59074	2.4458	2.7323	2.62869	3.19815	2.43691	1.91113	2.29935	2.35759	1.9426	3.21438	3.018	2.71853	2.88969	2.38152	2.08156	2.59074	2.58764	2.51911	2.62897	2.7323	1.86203	2.37281	2.6844	2.15982	3.16266	0.100031	2.53894	0.746902	0.460745	0.646371	-6.08476
CYHR1	2.49845	2.35385	2.21451	2.29522	2.24148	2.29047	2.59108	2.27259	2.08156	2.31234	2.2203	2.37235	2.42597	2.71827	2.54009	2.56365	2.80977	2.30247	2.21498	2.51204	2.50207	2.63033	2.71404	2.5916	2.54512	1.88186	2.83701	1.90446	2.97775	-0.0676959	2.42813	-0.67883	0.502277	0.677842	-6.13258
CYLC1	1.96224	1.92872	1.68949	1.85992	1.98134	1.76998	1.73353	1.72807	1.42176	1.49805	1.74526	1.88647	2.16391	2.52535	2.41599	2.36144	2.51609	1.91982	1.82544	1.90549	1.76101	1.85606	2.3677	1.96224	1.9614	2.14746	2.38254	2.07635	1.9216	-0.0550461	1.97499	-0.507738	0.615227	0.761079	-6.23309
CYLC2	2.10968	1.35171	1.23317	1.55228	1.50021	1.29657	1.43616	1.54678	1.27247	1.38329	1.63552	1.73118	1.94526	3.51178	2.29398	2.20375	2.17091	1.64594	1.47261	1.67353	1.78107	1.5367	2.21877	1.74762	1.67686	1.76844	2.10251	1.76101	1.64419	0.022546	1.76565	0.136048	0.892662	0.942254	-6.35244
CYLD	3.42146	3.46486	3.16818	2.99221	3.36042	2.9481	2.98386	3.70426	3.69311	3.42092	3.58281	3.1784	2.56987	2.66833	2.5097	2.41233	2.72279	2.7917	2.72006	2.64729	2.91898	3.23707	2.50557	2.6611	2.76831	3.46735	2.78135	3.2241	3.27189	0.189745	3.02746	1.37114	0.180168	0.360005	-5.44799
CYP1B1	3.03889	3.46952	3.06195	2.84182	2.61702	2.05201	1.90549	3.0376	3.6323	4.27545	3.93619	2.71325	4.03691	2.30794	3.01336	3.92338	2.81952	3.25045	3.42933	1.88647	3.74381	4.19377	3.52585	1.27886	3.02204	3.44469	1.4116	3.20669	2.09551	0.224888	3.00592	0.779794	0.441419	0.628667	-6.06007
CYP2C9	2.66269	2.36732	2.35012	2.63819	2.53587	2.56513	2.47623	2.39686	1.98692	2.74725	2.40421	2.41453	2.78533	3.18175	3.13347	3.04132	3.01075	2.75318	2.52179	2.71827	2.69607	2.61759	2.85044	2.34708	2.25422	2.48301	2.84019	2.42088	2.2043	0.070372	2.60017	0.6569	0.516088	0.688568	-6.14704
CYP2E1	1.66524	1.78331	1.60819	1.693	1.63879	1.75661	1.85701	1.753	1.32983	1.65692	1.51524	1.5662	2.05706	2.55883	2.44154	2.9909	2.42045	1.82056	1.90754	1.9862	1.98134	1.94809	2.21808	2.20695	1.67499	1.79698	2.13892	2.27172	2.16278	-0.109976	1.94504	-0.825863	0.415186	0.605027	-6.02379
CYP2J2	4.40025	4.34628	3.88363	4.06692	3.37633	4.11091	4.36397	3.32413	3.82251	3.34006	3.87872	3.92495	3.30896	4.09415	3.97175	3.70331	3.74647	3.68327	3.07867	3.39922	3.8587	3.54842	3.6143	4.10868	2.39686	3.86776	3.55273	2.98199	4.36397	0.324666	3.7282	2.04755	0.0491489	0.158031	-4.39521
CYP4B1	1.99167	1.59997	2.22222	1.5038	0.966551	2.92168	3.18965	2.89883	2.34849	3.00747	1.00386	2.02481	2.93327	2.64646	2.8292	2.63739	2.40231	2.26193	1.29657	4.2552	2.01098	0.983302	1.486	3.17586	0.710733	3.23849	2.89195	1.35974	3.51926	0.0357917	2.28682	0.112181	0.911403	0.95267	-6.35541
CYREN	3.03788	2.71186	2.61969	2.99539	3.00379	2.96408	2.62664	2.85653	3.00292	2.75664	2.68516	2.84675	2.92743	2.61759	2.40231	2.48762	2.5746	2.90563	3.00121	3.14771	2.94483	2.76234	3.07122	2.92459	2.42384	3.31543	3.54085	3.02801	3.01949	-0.235514	2.86904	-2.61646	0.0136029	0.0685553	-3.27184
CYSLTR1	1.65145	1.42497	1.52372	1.56403	1.40386	1.46466	1.53101	2.91683	2.6844	2.8156	2.11478	2.22222	2.69991	1.58519	2.0497	2.15425	2.08156	1.48925	1.42497	1.60202	1.48925	1.52885	1.76998	1.42497	1.37631	1.25373	1.50666	1.25373	2.09387	0.475621	1.79661	3.03849	0.00479302	0.0357108	-2.32894
CYTH1	1.90549	2.71827	2.54867	2.19153	2.33602	2.37687	2.40032	3.02477	3.0057	2.7881	2.77073	2.36689	2.52629	2.25045	2.58439	2.41712	2.05201	2.46277	2.91437	2.65141	2.60515	2.29624	2.13404	2.11164	2.8269	2.48988	2.43922	2.82811	2.43044	-0.0297537	2.49841	-0.273198	0.786511	0.876347	-6.32436
CYTH2	2.76437	3.00777	2.49915	2.87492	2.63033	2.85792	2.58968	1.91982	2.57808	2.59868	2.29522	2.60998	3.03554	2.97844	2.79404	2.79271	2.51661	2.68308	2.60872	2.67117	2.5034	2.83968	3.36384	2.70792	2.33979	3.05922	2.70704	2.92941	2.66619	-0.0893715	2.70423	-0.86531	0.393509	0.586927	-5.99114
CYTH4	2.62362	2.14169	2.59532	2.46456	2.7321	2.14169	2.65544	3.9588	4.08171	3.66506	3.4827	2.50437	3.68689	2.42628	3.20669	3.86659	2.48236	2.66269	2.64949	2.25997	2.68256	2.78337	2.4031	1.52372	2.68256	1.46466	1.30374	2.66742	1.46053	0.771304	2.66413	3.39578	0.0018907	0.0202156	-1.474
CYTIP	1.40797	1.30374	1.37954	1.2853	1.96224	1.7637	1.29107	3.86917	3.62045	3.74899	3.22557	2.44195	3.59559	1.94629	3.62463	3.58079	2.04574	1.90229	1.73353	1.69493	1.70326	1.30374	0.872996	0.924913	1.47261	0.58514	1.38753	1.04408	0.79966	1.19065	1.98336	3.99772	0.000367126	0.00761194	0.0525152
CZIB	2.71722	2.92147	2.76556	3.00073	2.90337	2.8275	2.86653	2.26992	2.73897	2.33137	2.22268	3.22239	2.97931	3.35241	2.97349	2.6844	3.4986	2.90276	2.80559	2.84301	2.9408	2.90172	3.27523	2.98151	2.55763	2.80208	2.71325	2.55501	2.96749	-0.01408	2.84559	-0.127467	0.899394	0.945917	-6.35357
DAAM1	2.57363	2.77425	2.73945	2.83456	3.48846	2.97398	2.88569	3.15082	2.51576	1.88744	3.09787	2.68892	2.83675	3.09986	2.87889	2.93408	3.97708	3.28782	3.67446	3.10714	2.89351	3.16468	2.88261	3.08409	2.40964	3.74048	2.88109	3.30377	3.05172	-0.221213	2.99374	-1.49699	0.1445	0.316068	-5.27872
DAAM2	2.69877	2.64675	2.72786	3.04661	2.72943	2.95312	3.07495	3.11669	3.09817	3.08938	2.62255	2.9702	3.14079	2.91683	3.74048	2.53099	3.09871	3.10595	2.95184	3.15023	3.33481	2.79123	2.51164	3.14833	2.23373	2.74897	3.07931	2.7047	2.95477	0.060118	2.9282	0.542485	0.591359	0.742644	-6.21498
DAB2	2.61105	2.24001	3.25905	3.02396	3.57791	3.08409	2.76234	3.94494	3.91008	3.84107	3.43363	3.96063	3.58467	2.29355	2.71875	2.92718	2.51946	3.94494	4.22627	2.6639	3.18669	3.08042	3.39785	2.56365	3.04885	2.90038	2.01963	3.2985	2.4458	0.0936371	3.11963	0.437751	0.664598	0.796146	-6.266
DACH1	1.84451	1.6589	1.69138	1.74762	1.80992	1.64419	1.90831	1.97469	1.7148	1.12602	1.39513	3.21681	1.32543	1.94723	2.16092	1.88543	2.57658	1.94629	2.18054	1.83053	1.87528	2.02277	1.93975	2.29312	2.11109	2.74309	1.88951	2.33222	2.3373	-0.26466	1.96998	-1.79422	0.0825264	0.223233	-4.82933
DACT1	2.09749	2.7397	2.05781	2.77583	2.89137	2.372	2.22222	2.49455	2.83136	1.49528	2.41001	2.53254	2.61993	1.86749	1.66524	2.33222	2.4231	2.2102	2.50768	1.67828	2.04906	2.79924	3.2651	1.84015	3.41004	1.97299	3.5534	3.32052	1.74907	-0.186811	2.42013	-0.951613	0.348647	0.545368	-5.91467
DAD1	3.53781	3.7499	3.85315	3.71379	3.58202	3.7652	3.91127	3.58938	3.54783	3.56697	3.37305	3.57044	3.22341	3.32749	3.11393	3.2238	3.28823	3.67286	3.7641	3.65193	2.93891	3.73928	3.50333	3.23005	3.66334	3.89841	3.80836	3.68594	3.52895	-0.0647091	3.55252	-0.680726	0.501093	0.677274	-6.1313
DAG1	3.54783	3.68787	3.44416	3.54365	3.48893	3.57661	3.61224	3.13232	2.86096	3.45038	3.08795	3.60596	3.54491	3.68327	3.41874	3.28823	3.38568	3.45923	3.38184	3.7652	3.4973	3.50825	3.40567	3.33481	3.22055	3.40731	3.49643	3.47535	3.71475	-0.0393	3.44919	-0.497197	0.622555	0.767225	-6.23836
DAO	2.85355	2.10649	2.26802	2.55599	2.32515	2.43391	2.43113	2.55501	2.61281	3.20283	4.19908	2.15227	2.43186	2.768	2.84558	2.63033	2.54425	2.49425	2.37797	2.51698	2.41308	2.50079	2.59835	2.1292	1.97759	2.16222	2.51754	2.15227	1.93878	0.327214	2.50673	2.2412	0.0323069	0.118553	-4.03445
DAP3	3.40778	3.2735	3.34693	3.25549	3.49328	3.38478	3.41368	3.14596	3.1792	2.78614	2.92302	3.33236	3.02744	3.24056	2.98199	3.22587	3.01305	3.17075	3.25281	3.03014	3.34859	3.47261	3.59091	3.2003	3.0376	4.11812	3.09505	3.54085	2.81202	-0.103986	3.24485	-1.03057	0.310706	0.510787	-5.83873
DAPK1	2.57628	2.29127	2.86945	2.80293	3.33041	3.12119	2.58378	3.04851	2.8238	2.92408	3.51121	3.13404	1.75429	2.52452	2.60487	2.14686	1.65145	2.68489	3.30337	2.49425	2.59476	2.06588	2.08003	2.83871	2.88969	2.75964	3.26443	2.9702	3.43225	-0.0933347	2.72679	-0.53688	0.595179	0.744828	-6.21798
DAPK2	2.89927	2.80265	2.79349	3.11793	2.63206	2.94132	3.12896	2.30639	2.28564	2.36394	1.61599	2.33002	3.44803	3.23633	3.73744	2.99746	3.67372	2.95669	2.76725	3.36838	2.94542	2.76262	2.54867	3.4587	2.3873	2.6649	4.08171	2.80236	3.07733	-0.143307	2.9011	-0.772043	0.445929	0.632695	-6.06598
DAPP1	2.96162	2.86375	2.97462	2.98888	3.03655	3.02887	3.0653	5.46315	4.70878	4.41203	5.06886	3.44416	3.98303	2.68744	4.55864	4.88255	2.16222	3.12687	3.17514	3.07867	3.07956	2.96189	1.57163	1.85992	1.64749	2.88052	1.53409	1.90754	1.48275	1.3053	3.12402	4.11282	0.00026632	0.00628678	0.353544
DARS2	2.36224	2.23865	2.25272	2.57986	2.16092	2.58411	2.48162	2.69821	2.13778	2.29522	2.66543	2.37559	2.29798	2.49393	2.72168	2.4516	2.68046	2.64249	2.34083	2.67691	2.48038	2.62841	2.79716	2.6057	2.0188	2.52662	2.79634	2.42597	2.74807	-0.117425	2.48847	-1.44452	0.158616	0.335506	-5.35087
DAZAP1	2.9037	3.19971	2.95342	2.41599	2.22649	2.6941	2.7959	3.0305	2.50869	2.41753	2.2321	2.05706	2.83212	2.93714	2.67222	2.79325	2.34756	2.83088	2.8834	2.89547	2.79048	2.89724	2.83871	2.64838	3.01125	3.38784	3.0684	3.44357	2.7047	-0.30194	2.77303	-2.73471	0.0102256	0.0573488	-3.01596
DAZAP2	3.88958	3.6005	3.72228	4.0191	3.93202	3.88818	3.51555	3.97569	3.92627	3.93075	3.66776	3.47059	3.55479	3.37633	3.51061	3.49168	3.45815	3.80618	3.57896	3.60934	3.8956	3.94929	3.35158	3.22307	3.77251	3.69311	3.58079	3.97991	3.374	0.0505593	3.68083	0.567332	0.574571	0.73204	-6.2013
DBN1	3.06811	3.12444	2.91949	3.21859	2.83478	3.14868	3.25669	2.85248	3.19874	3.23244	3.03282	3.13373	2.98096	2.56481	2.88212	3.21534	2.60309	3.03742	3.008	3.08353	2.52325	2.73132	3.56767	2.183	3.28856	3.6241	2.74967	3.16761	2.01654	0.100669	2.97407	0.765546	0.449731	0.635826	-6.07089
DBNDD2	3.84663	3.77562	4.23223	3.9465	3.70708	4.04866	4.12916	3.2612	2.03046	3.04001	2.9494	4.05739	3.57346	4.15142	4.06888	3.78212	4.07294	4.50264	4.54079	4.59827	4.21005	4.52242	5.02671	4.40466	4.77837	4.66736	3.55975	4.37918	4.13815	-0.757372	4.00005	-4.20903	0.00020335	0.0054154	0.606912
DBT	3.03119	2.321	2.45686	2.40421	2.10056	2.40633	2.79763	2.7808	2.57658	2.07562	3.03711	2.99561	2.53254	2.74607	2.29212	2.80921	2.46127	2.47901	2.41094	2.64702	2.85711	2.72601	2.55265	2.19537	2.76962	2.8032	2.16222	2.7602	2.65847	-0.007229	2.58091	-0.0693183	0.945181	0.96954	-6.3593
DCAF10	2.63903	2.64534	2.50274	2.63062	2.44751	2.72684	2.76383	2.81649	2.82616	2.85464	2.13595	2.47253	2.58296	2.69579	2.57363	2.70448	2.43113	2.7492	2.89251	2.72727	2.74252	2.7917	2.75096	2.22516	3.09787	2.51482	2.71744	3.31423	3.14366	-0.190925	2.69369	-2.13983	0.0403401	0.137742	-4.22628
DCAF11	3.09505	2.76776	2.91497	2.7621	2.75533	2.84988	3.22977	2.85491	2.74661	2.78945	2.68019	3.29816	2.43846	2.65054	2.372	2.71875	2.38835	3.0254	3.0838	3.20091	3.00049	3.11452	2.96658	3.1227	3.14655	3.13135	3.39048	3.51739	3.35673	-0.388334	2.94377	-4.42089	0.000111833	0.00388424	1.16952
DCAF15	3.08824	2.8311	2.55465	2.90713	2.75022	2.9416	2.7824	2.67008	2.45053	2.76891	1.98692	2.1372	3.42146	3.4312	3.04752	3.65574	3.45498	2.66161	2.75664	2.77903	2.79404	2.88902	3.3233	2.74172	2.26325	2.34015	3.16537	2.34708	2.50274	0.161623	2.80841	1.09231	0.283104	0.481433	-5.77543
DCAF16	2.95055	2.12634	2.35511	2.9561	2.27486	2.6668	2.3227	2.92147	2.74172	2.77342	3.0888	2.56083	2.6602	2.86152	2.76349	3.05491	2.83891	2.86818	2.53945	2.98318	2.77928	2.62024	2.75264	2.37687	2.29798	2.62897	2.61133	2.12194	2.3535	0.123245	2.65004	1.19717	0.240307	0.433331	-5.66018
DCAF6	3.33887	3.81923	3.5051	2.91732	3.2117	3.416	3.37444	2.7323	3.38887	3.02002	2.89517	3.50333	3.4827	3.49168	3.45196	3.26042	3.47344	3.71186	3.33762	3.52103	3.61645	3.84228	3.17788	3.72421	3.52279	2.93126	3.4973	3.48493	3.56233	-0.183423	3.38664	-1.82178	0.0781398	0.215636	-4.7843
DCAF7	2.53276	2.53789	2.6941	2.40146	2.38988	2.34666	2.61941	2.61496	2.39872	2.53618	2.2865	2.65221	2.48195	2.59187	2.7065	2.48	2.66295	2.47197	2.4458	2.62725	2.53099	2.62219	2.63637	2.63393	2.6949	2.33769	2.80473	2.37603	2.77268	-0.0540153	2.54788	-0.886998	0.381903	0.577213	-5.97257
DCHS1	3.07681	3.06387	2.85922	2.98151	2.87864	3.22239	2.98338	2.21498	3.28215	2.89005	1.99994	2.92743	3.82053	2.93891	3.24904	3.80742	3.27038	2.92223	3.24027	2.89086	3.01573	3.0667	3.57408	2.7084	3.00319	2.83136	2.57045	2.91236	2.51973	0.0895031	2.99041	0.625822	0.536008	0.703454	-6.16674
DCLK1	2.17142	1.66325	2.43044	2.31497	3.28176	2.23959	2.39211	3.19458	3.06588	3.02113	2.71404	2.5809	2.89604	2.20061	2.75817	2.59476	2.31666	2.53546	3.59559	2.48069	2.45686	1.68321	1.5807	2.07365	2.49223	2.71698	2.62421	2.89927	1.74404	0.171699	2.50756	0.972245	0.338447	0.536926	-5.89538
DCLRE1C	2.5014	2.52904	2.27218	2.61405	2.73543	2.79924	2.58067	3.32136	3.14239	3.41562	3.14868	2.71875	2.62255	2.3991	2.80396	3.03402	2.42203	2.58713	2.44751	2.58035	2.76725	2.19941	2.31455	2.50768	2.62255	2.17783	2.03967	2.64897	1.76533	0.380078	2.61099	3.2111	0.00307257	0.027826	-1.92161
DCN	4.00661	4.05058	4.49691	5.14564	4.68458	4.16074	4.67629	4.07294	5.02671	4.80845	4.20489	4.00798	5.14564	3.87172	4.092	4.26064	4.14031	4.30665	4.55257	4.62019	4.46299	3.97569	3.78319	3.81817	3.70605	4.21977	3.25361	4.58581	3.52716	0.335441	4.26429	2.10943	0.0430733	0.144186	-4.28254
DCP1A	3.16592	2.83323	2.77294	3.34766	3.04391	3.29285	2.89251	2.9962	2.90091	2.86774	2.8042	2.92693	2.94887	2.98467	2.91732	3.10136	2.9962	3.0584	3.0832	3.01125	3.08184	3.06139	2.89402	2.64729	3.36454	3.03374	3.25669	3.02346	3.18013	-0.0701469	3.01687	-1.00184	0.324169	0.523902	-5.86702
DCP2	2.76634	2.66464	2.90819	2.75605	2.9408	2.70015	2.57628	3.46693	3.26369	3.37112	2.92595	2.59835	3.05691	2.59742	2.87541	2.69172	2.45686	2.80044	2.84324	2.34442	2.41599	2.39648	2.10195	2.78029	2.97629	2.01724	2.33313	2.44336	2.57899	0.357162	2.71202	3.256	0.00273288	0.0253442	-1.81386
DCT	1.97384	1.87273	1.72807	2.17726	1.97058	1.95526	1.9592	2.62869	2.1585	2.57014	2.69964	2.91437	1.64074	1.53101	1.59178	1.52885	1.11454	2.34633	1.97543	2.28332	2.30207	2.25794	1.4116	2.95791	2.54295	2.63951	2.71619	2.71215	2.51482	-0.387458	2.16122	-2.37157	0.0240993	0.100163	-3.77854
DCTD	2.82811	2.92361	2.8163	2.76962	2.80018	2.86345	2.87293	2.66358	2.73185	2.93204	2.40459	2.711	3.08576	3.0254	2.89086	2.88902	2.76349	2.80208	2.58792	2.55465	2.67972	2.85985	2.95282	3.00945	2.51517	2.93517	2.43626	2.82117	2.4948	0.101116	2.78003	1.41204	0.167889	0.346387	-5.3944
DCTN2	3.43076	3.64315	3.7234	3.81701	3.58281	3.82899	3.84911	3.21029	3.16169	3.27773	3.18175	3.37031	3.38696	3.73744	3.67615	3.59211	3.70503	3.81183	3.67977	3.92888	3.63151	3.66944	3.9654	3.60999	3.65125	3.59008	3.86503	3.65574	3.31846	-0.158429	3.60524	-1.88211	0.0692282	0.198999	-4.68381
DCTN3	3.61355	3.55608	3.52279	3.7969	3.65193	3.63371	3.68878	2.98947	2.78312	2.99396	2.89665	3.37809	2.77774	4.04454	4.04454	3.79589	3.95072	3.66023	3.46486	3.70079	3.45196	3.51504	4.32998	3.82154	2.93298	3.40684	3.43826	3.43784	3.41467	-0.0703591	3.50667	-0.491522	0.626516	0.768993	-6.24115
DCTN4	3.26237	2.83212	3.04941	2.68721	2.59678	2.67837	2.88935	2.5916	2.54925	2.63848	2.56365	2.90869	3.08107	3.1527	3.05031	2.83923	3.19002	2.82896	2.43044	2.75964	3.05809	3.07313	3.00622	3.25549	2.72427	2.78563	2.39504	2.53099	2.83531	0.0495712	2.83599	0.518127	0.608045	0.754418	-6.2278
DCTN6	3.47059	3.79915	3.55859	3.70248	4.06306	3.54153	3.45196	3.15825	3.46379	3.46643	3.43225	3.80038	3.24868	3.62045	3.42989	3.45038	3.46227	3.66183	3.29357	3.70248	3.51926	3.47218	3.55918	3.45923	3.10658	3.6005	3.46326	3.24362	3.47804	0.0731686	3.5062	0.923007	0.363125	0.559989	-5.94078
DCTPP1	3.05642	3.20958	3.277	3.37248	2.97902	3.31385	3.08663	2.63477	2.80764	3.07984	2.71927	3.38393	3.2003	3.26266	3.374	3.13266	2.90763	3.55975	3.38742	3.52716	3.12595	3.5051	3.93324	3.38306	3.08965	3.17479	3.28102	3.23671	3.11	-0.253741	3.21074	-2.77319	0.00930755	0.0539937	-2.93124
DCUN1D1	2.95184	2.9672	3.01573	2.85491	3.0888	2.88734	3.00234	3.18866	3.07394	3.21565	3.45542	3.18904	2.44234	2.71379	2.44299	2.52566	2.57628	2.85684	2.78563	3.06025	2.77719	2.82009	2.48597	2.83778	2.9663	2.86626	3.15301	2.90763	3.17157	0.0264608	2.90622	0.272895	0.786742	0.876426	-6.32444
DCUN1D4	2.48129	2.47007	2.57429	2.3792	2.51576	2.19374	2.51911	2.32844	2.35759	2.47588	2.52145	2.91462	2.04296	2.34174	1.70858	2.20209	2.19102	2.24099	2.36805	2.36032	2.36109	2.42519	2.57014	2.59187	2.50557	2.88028	2.80128	2.81536	2.56987	-0.175081	2.4382	-1.90483	0.0661068	0.193747	-4.6453
DDAH1	4.22627	4.88255	3.97991	3.52279	4.08328	3.90602	2.92862	3.08912	4.09023	3.66688	4.11332	2.92147	4.05739	3.19732	3.49544	3.70787	3.44803	2.67254	2.51754	2.78945	3.10967	3.68594	3.45596	2.51164	3.1332	3.47714	3.37485	2.95131	3.18904	0.652145	3.45465	3.83005	0.000583797	0.010649	-0.381458
DDAH2	3.15706	3.4973	3.06087	3.42685	3.67977	3.24868	3.05198	3.52161	3.42877	3.31971	3.2202	2.85355	3.42595	2.85384	2.91664	3.16051	3.06114	3.10102	3.30114	3.22111	3.17103	2.77049	3.10481	3.08857	2.78165	3.30443	3.13995	2.97462	3.2685	0.12622	3.17627	1.46177	0.153857	0.329892	-5.32739
DDB1	3.1713	3.0469	2.94375	3.24163	3.2339	3.277	3.07122	2.99322	2.61796	3.68157	2.91159	2.87975	3.07931	3.29705	3.17753	3.07681	3.25361	3.16266	3.07263	3.20701	3.2238	3.26443	3.10714	3.27489	2.85577	3.30773	3.12687	2.94783	2.73643	0.00768171	3.11177	0.0930718	0.926445	0.960276	-6.35737
DDHD2	2.8626	2.96604	2.80018	2.84244	2.76068	2.79895	2.87843	2.43012	2.41851	2.0652	2.5683	3.06114	2.91382	3.12503	2.99371	2.93234	3.25507	2.93577	2.76139	2.88236	2.8275	2.56083	3.01075	3.29556	2.78885	2.5034	2.62389	2.54641	3.10136	-0.0155687	2.81071	-0.15117	0.88082	0.934458	-6.35026
DDIT4	2.10195	2.3811	2.10195	1.96411	3.81424	2.90898	2.62057	3.44803	3.2532	3.9167	3.32995	3.31196	3.70977	2.29573	3.64571	3.05	2.3837	2.3837	1.22521	2.61879	2.44057	1.91639	1.43299	2.78913	1.52071	2.09275	1.63722	0.983302	2.13404	1.02392	2.53146	4.58076	7.1e-05	0.00318468	1.59757
DDR1	3.46277	3.30518	3.04275	3.10079	3.11512	3.43076	3.19393	2.55434	2.87975	2.47328	2.71479	2.4366	3.67977	3.44215	3.3589	3.342	3.74048	3.24935	2.82896	2.96991	3.33167	2.97271	3.10413	2.90792	2.60024	2.85355	4.21462	2.80293	3.30518	0.0386299	3.11774	0.26049	0.796207	0.883001	-6.32775
DDRGK1	2.71504	2.64729	2.63006	2.94887	2.92117	2.77497	2.97247	2.94132	2.97657	2.80505	2.62362	2.65706	3.2117	2.71296	3.03188	2.73742	2.89927	2.88543	2.82298	2.85769	2.96162	2.80344	2.44265	2.29986	3.21565	2.41201	2.93043	3.16018	2.97512	0.0217678	2.82668	0.248765	0.805181	0.888616	-6.33074
DDT	2.98947	3.2202	3.11571	2.72305	2.91182	3.4469	3.09206	2.76068	2.8882	2.64978	2.83136	2.97844	3.04544	3.22055	3.17615	3.29556	3.18636	3.26443	3.39741	3.48318	2.99889	2.9754	3.19458	3.28325	3.24725	2.90007	3.27954	2.90062	3.05809	-0.133948	3.0867	-1.62472	0.114337	0.272738	-5.09392
DDX1	3.3448	3.1745	3.30256	3.17418	3.41562	3.21501	3.51995	2.92763	3.14329	3.0763	3.0938	3.08488	3.12094	3.38217	3.13042	2.94858	3.05136	3.40917	3.25216	3.4469	3.71073	3.66857	3.24362	3.77798	3.36418	3.58607	3.40731	3.3097	3.63003	-0.301165	3.30732	-4.23873	0.000187057	0.00510011	0.68541
DDX10	2.50557	2.45196	2.56924	2.7788	2.80977	2.82636	2.68046	3.27304	3.00379	3.04576	3.374	3.23505	1.58932	2.04378	1.90016	2.32183	2.10897	2.82478	2.61615	2.29355	2.84628	2.63974	2.21299	2.89517	3.03454	2.93816	2.93408	2.77294	2.76139	-0.112116	2.66509	-0.731311	0.470076	0.65291	-6.0961
DDX17	3.34006	3.3448	3.18937	3.49643	3.54022	3.42685	3.43859	3.18071	4.00505	3.25045	3.08857	3.16537	4.06692	3.33041	3.77899	4.33568	3.09449	3.30411	3.37356	3.16111	3.307	2.87047	2.65084	3.21291	2.60409	2.82094	3.19322	2.57045	3.0938	0.461338	3.28398	3.69838	0.000837313	0.0130453	-0.717922
DDX18	2.70044	2.72035	2.80265	2.6869	3.00646	2.73791	2.62164	3.07495	2.97398	3.17514	3.01745	2.60695	2.40384	2.52289	2.71296	2.54617	2.5097	2.58536	2.57281	2.51517	2.60837	2.68721	2.71642	2.18946	2.98467	3.19755	2.29659	2.99965	2.26325	0.11943	2.70472	1.20284	0.238135	0.430982	-5.65367
DDX19A	2.73564	3.19662	2.75876	2.71404	2.89927	2.77612	2.72006	3.04789	2.71642	2.78312	2.87772	3.13232	2.33532	2.62696	2.34849	2.48301	2.53004	2.73417	2.70792	2.7113	2.61226	2.78389	2.7084	2.48452	3.03976	3.05444	2.77209	3.09756	3.02429	-0.0648934	2.77284	-0.740556	0.46453	0.648842	-6.0894
DDX23	2.45403	2.44617	2.29843	2.3101	2.32467	2.47523	2.53193	2.59332	2.24001	2.43497	2.2495	2.22322	2.54009	2.44234	2.4366	2.60659	2.4783	2.53971	2.53667	2.38035	2.24148	2.48069	2.62809	2.53697	2.90734	2.55399	2.3559	2.51308	2.44917	-0.0934955	2.45548	-1.51083	0.140948	0.310793	-5.25932
DDX24	3.26083	3.44019	3.20352	3.18536	3.46084	3.397	3.20923	2.76293	3.11299	3.05412	3.07291	3.19168	3.1773	3.4973	3.26743	2.88316	3.12595	3.24725	3.23671	3.28856	3.11107	3.50624	3.21859	3.10288	3.24935	3.31423	3.31929	3.30999	3.35419	-0.0772493	3.22624	-1.12128	0.270773	0.468292	-5.74457
DDX27	2.77294	2.75843	2.83647	2.9108	2.98918	2.90621	3.02933	3.14771	3.23884	2.80714	3.18393	2.83165	2.78416	2.66596	2.82587	2.77445	2.81341	3.07086	3.00489	3.13712	3.14897	2.75578	2.87179	2.58944	3.24868	3.22111	2.55763	3.23276	2.69652	-0.0626794	2.92455	-0.765617	0.449689	0.635826	-6.07084
DDX28	2.85818	2.58127	2.57076	2.5863	2.5916	2.49878	2.72113	2.90898	2.62664	2.99514	3.09016	3.14712	2.48493	2.85518	2.49361	2.76526	2.46706	2.8243	2.50832	2.75022	2.82811	2.82558	2.8629	2.81928	2.34083	2.93408	2.43113	2.33137	2.46751	0.0598205	2.69537	0.691276	0.494532	0.672825	-6.12416
DDX3X	3.70079	3.41976	3.01892	2.43955	2.9702	2.59709	2.92271	2.88261	2.43044	2.9037	3.09897	2.08994	3.07059	3.19002	3.5015	3.23777	3.29482	3.18669	3.07733	2.85175	3.50573	3.25549	3.14424	3.14571	3.32634	3.13685	2.44088	3.56308	2.75761	-0.129541	3.04004	-0.939159	0.354903	0.551952	-5.92613
DDX3Y	-0.185339	0.11114	4.01759	3.26443	-0.909001	3.58865	3.78684	-0.185339	3.40828	-0.185339	0.11114	3.39623	2.70193	2.66947	-0.185339	2.82975	-0.185339	-0.185339	0.266263	-0.909001	0.11114	3.59763	2.55135	3.16818	4.10258	3.32169	3.08824	3.77899	3.342	-0.536158	1.87184	-0.832316	0.41159	0.602686	-6.01855
DDX41	2.47933	2.61133	2.43803	2.44195	2.57899	2.48038	2.51308	2.36262	2.19774	2.31048	2.06277	2.06965	2.72889	2.89574	2.76585	2.72427	2.69388	2.45296	2.36838	2.14348	2.47253	2.61379	3.01181	2.61022	2.23259	2.63365	2.52566	2.43497	2.5109	-0.00944195	2.49538	-0.105451	0.916697	0.954506	-6.35614
DDX46	2.95394	2.9526	2.93973	3.15023	3.00346	3.21367	3.02505	3.18809	3.12838	3.21438	2.96686	3.35639	2.77612	2.82505	2.94483	2.6075	2.93544	2.96826	3.0763	3.24027	3.2303	3.17876	2.87237	3.12002	2.96381	3.34398	2.96356	3.01181	2.99915	-0.0700275	3.03967	-0.999463	0.325301	0.524657	-5.86933
DDX49	3.00885	2.76068	2.66924	2.7602	2.53945	2.93942	2.92302	2.6786	2.41308	2.64057	2.6057	2.53618	2.80473	3.10205	3.00747	3.0745	2.95953	2.82298	2.84244	2.87864	2.78563	2.83923	3.07769	3.1805	2.5294	2.90621	2.51544	2.77558	2.7113	-0.0324827	2.80304	-0.40523	0.688088	0.812153	-6.27966
DDX50	3.06139	3.48792	3.33848	3.36709	3.77351	3.09257	3.26402	1.46053	4.26861	3.46785	4.10004	4.41671	3.416	4.14031	2.67602	3.64884	2.87519	2.97433	3.1784	2.97322	3.32169	3.25742	2.73824	3.20352	3.56697	2.98012	2.53254	2.69388	2.13052	0.440669	3.22089	2.07707	0.0461624	0.151095	-4.34178
DDX54	2.33602	2.6955	2.44787	2.62841	2.85653	2.53166	2.68547	2.94455	2.60487	2.86549	2.70221	2.65456	2.1818	2.44154	2.37837	2.40964	2.29624	2.87237	2.56893	2.4516	2.76671	2.74392	2.69012	2.37317	2.81952	2.9408	2.8163	3.13627	2.79271	-0.179422	2.64252	-2.1441	0.0399689	0.136646	-4.21834
DDX60	2.29047	2.29312	2.54066	2.29312	2.61525	2.44819	2.36608	3.25432	2.63206	3.43968	3.20352	2.79429	2.6668	2.62281	2.77241	3.45196	2.12741	2.48339	2.3505	2.04684	2.2594	2.22602	2.25997	2.67439	1.39912	1.8519	1.67012	2.4704	1.77854	0.572282	2.45802	3.9338	0.000438392	0.00859911	-0.113616
DECR1	3.92495	3.83381	4.01364	3.9167	3.84228	3.90258	4.13372	3.60458	3.51607	3.32461	3.29891	4.77837	3.27446	3.97812	3.80038	3.5467	3.69135	4.20751	4.45466	4.26609	3.96332	3.98965	3.87614	4.15479	3.98965	3.94494	3.59559	4.06692	4.27863	-0.278525	3.90238	-2.3767	0.0238188	0.0993756	-3.76826
DEDD	3.11393	2.77241	2.95367	2.86549	2.47715	2.85653	2.80375	2.40384	2.59301	2.17682	2.75634	2.36559	3.19531	3.31463	3.57218	2.92743	2.92693	2.9481	2.90512	2.97931	2.86443	3.03454	2.96189	2.92083	2.79377	2.66648	2.84275	2.74252	3.25118	-0.0813021	2.86158	-0.744397	0.462237	0.646876	-6.08659
DEK	2.79404	2.87772	2.90951	2.66856	3.09505	2.6611	2.6955	2.99036	2.71032	2.83796	2.66924	3.16169	2.65935	2.4958	2.44917	2.23019	2.3895	3.34159	3.10288	3.26154	2.58914	2.78505	2.74807	2.94102	2.99066	3.04544	3.28589	3.43503	3.50987	-0.36311	2.87349	-3.61571	0.00104819	0.0145941	-0.926996
DELE1	3.42989	3.44134	3.40517	3.45248	3.1133	3.38518	3.2238	2.99539	3.19097	3.08514	3.3295	3.56909	3.12977	3.29629	3.52969	3.22307	3.46084	3.1133	2.55852	2.80208	2.97931	2.95669	3.01745	3.39367	2.72006	2.66464	2.52391	2.55563	2.96189	0.455534	3.12097	5.4489	5.91e-06	0.000732376	3.94821
DENND2A	2.63819	2.71927	2.5294	2.7925	2.56543	2.60931	2.80152	2.28816	2.73742	2.54039	2.14233	3.13434	2.83701	2.28105	3.43452	3.08912	2.29047	2.64924	2.8849	2.72751	2.44648	2.57216	2.31938	2.93942	2.15365	2.84529	2.8834	2.95394	2.78003	-0.00724006	2.67537	-0.0632561	0.949968	0.971789	-6.35971
DENND4B	3.07984	2.99193	2.96329	2.9443	2.74522	2.99965	3.09817	3.46643	3.21891	2.8168	2.75129	3.10205	2.86375	2.6949	2.79716	3.24429	2.58378	3.22471	3.40256	3.28482	3.01521	2.87541	2.98747	2.92963	3.29009	3.03432	2.98467	2.99721	3.14329	-0.134993	3.01831	-1.66741	0.105495	0.258776	-5.02932
DENND4C	2.26847	2.23412	2.22414	2.23784	2.39171	2.44787	2.61854	2.2926	2.70792	2.57723	2.41269	2.60837	2.58713	2.35459	2.53276	1.88862	2.14686	2.1645	2.45547	2.59187	2.24434	2.40751	2.52729	2.49115	2.37725	2.41561	2.59332	2.71534	2.29212	-0.0554457	2.40715	-0.721359	0.476089	0.65791	-6.10322
DENND5A	3.79237	4.15645	3.72613	3.66265	3.62529	3.84228	3.94929	3.60195	3.6505	3.60744	3.34811	3.88093	3.6143	3.59621	3.83855	3.63707	3.74807	3.78469	3.67041	3.57541	4.092	3.90761	3.50718	3.35973	3.70708	3.34239	3.32591	3.69218	4.21462	0.0406118	3.70541	0.456596	0.651141	0.786287	-6.25761
DENND5B	1.6861	2.31048	1.83701	1.52372	1.55404	1.39089	1.59766	1.63331	1.80483	1.6549	2.05267	2.1292	1.65692	1.99167	1.65692	1.6681	2.08358	1.91412	1.92773	2.1083	1.97384	2.10386	2.24728	2.22974	2.43922	2.0652	2.13833	2.32748	2.65456	-0.399119	1.94351	-4.34952	0.000136863	0.00443587	0.979326
DENR	2.76293	3.33087	3.06165	2.62024	3.1688	2.64675	2.59369	3.1923	3.16946	2.83778	3.09082	2.4562	3.38027	2.55635	3.20958	2.98012	2.4562	2.72999	2.82587	2.75991	2.21877	2.72751	2.30923	2.93327	2.62362	2.85818	2.67778	2.4366	2.61796	0.269364	2.80113	2.56157	0.015499	0.0749521	-3.38821
DEPP1	2.68951	2.49646	3.22947	3.94185	3.74048	3.77899	4.44858	4.12007	4.95646	4.20751	4.17307	4.02082	3.60865	2.64121	2.10968	3.24362	2.38988	3.65339	3.51852	3.84554	3.69388	3.18503	2.74197	2.99274	3.15178	4.36397	2.47363	3.22803	3.48554	0.156262	3.45277	0.620243	0.539626	0.706271	-6.17018
DEPTOR	2.71983	2.24915	2.7987	3.08156	2.85849	2.90276	2.96488	3.10773	3.3954	3.61509	2.77445	3.12147	3.45038	2.63062	2.18742	2.96329	2.14123	3.23177	2.97048	2.78999	2.63419	2.68798	2.72456	2.75488	2.27486	2.80639	2.76234	2.89224	2.59108	0.12008	2.83046	0.921653	0.36382	0.560809	-5.942
DERA	2.59678	2.60487	2.14233	2.277	2.36109	2.41233	2.58439	2.48493	2.1852	2.43215	2.5313	2.86796	2.23412	2.46572	2.24666	2.12259	2.4283	2.43626	2.15227	2.70044	2.11038	2.66414	2.81414	2.3505	2.00307	3.0052	2.4948	2.83061	2.65789	-0.107854	2.45508	-1.12044	0.271121	0.468448	-5.74546
DERL1	2.68333	2.93891	2.73417	2.0809	2.4978	2.18946	2.74252	2.41561	2.30716	2.62341	2.73155	2.4188	2.55465	2.86345	2.84962	2.86847	2.72574	2.52202	2.35459	2.83591	2.84558	2.76914	2.68819	2.51724	2.75318	2.57864	2.05267	2.93015	2.89463	-0.0436572	2.61957	-0.453102	0.653628	0.787788	-6.2592
DERL2	2.43359	2.7518	2.83427	2.21661	2.44718	2.35921	2.50869	2.7065	2.53789	2.50631	2.57899	2.50704	2.23316	2.57216	2.34756	2.41269	2.47253	2.58602	2.5226	2.37997	2.23412	2.73022	2.61615	2.27953	2.73718	2.80945	2.67552	2.88652	2.4729	-0.0818562	2.52953	-1.09709	0.281041	0.478762	-5.77039
DESI2	2.80714	2.99274	2.71672	2.96245	2.93517	2.95232	2.92888	2.49084	2.65876	2.71565	2.75208	2.9416	2.58067	2.75634	2.4031	2.62341	2.75045	2.76465	2.7979	2.82616	2.79716	2.73444	2.93157	2.84675	3.21055	3.09719	2.86124	3.23633	2.97072	-0.160045	2.82907	-2.23277	0.0329155	0.120301	-4.05064
DET1	3.15734	2.79845	2.94102	3.20482	2.98072	3.08684	3.03479	3.05669	3.11193	2.94834	3.2117	3.88513	2.82666	2.9121	2.47227	2.77472	2.93816	3.19851	3.25118	3.22947	3.30411	2.9672	2.71325	3.09636	2.8163	3.01657	3.47486	2.75129	3.49111	-0.0890844	3.05696	-0.850321	0.40166	0.593441	-6.00372
DEXI	3.45248	3.31271	3.47764	3.2192	3.11299	3.39658	3.44532	3.09505	3.43551	3.16975	3.51504	4.17895	2.9369	2.91132	2.7602	3.13404	2.73043	3.77251	3.6241	3.60744	3.70503	3.93075	3.56095	2.98581	4.00017	3.38102	4.13815	3.40731	3.66265	-0.395984	3.41586	-3.24209	0.00283413	0.0261056	-1.84734
DGCR2	2.36066	2.79505	2.43691	2.41627	2.25272	2.56543	2.63869	2.92247	2.7959	2.89979	2.5097	3.05088	2.1187	2.30379	2.09812	1.98279	2.20375	2.51881	2.54488	2.87047	3.01892	2.4579	2.43691	2.37441	3.06439	2.85577	2.80609	3.06588	2.78835	-0.242293	2.59153	-2.1972	0.0355987	0.126517	-4.1185
DGKD	3.88818	3.539	3.57472	3.59008	3.05616	3.342	3.37356	2.90792	3.41643	2.4606	3.25669	2.85985	2.33891	2.87949	3.06559	3.29246	3.09954	3.36156	3.45658	3.29891	3.60262	3.42092	3.89977	2.88052	4.1705	3.91275	3.70248	4.81824	2.97681	-0.452129	3.3601	-2.72025	0.0105921	0.0583047	-3.04763
DGKZ	3.1062	3.16084	2.9318	2.56543	2.74661	3.01471	3.36492	3.17788	3.32749	2.74897	2.74028	2.56422	3.45097	2.94001	3.35847	3.26712	2.63707	2.52507	3.36664	3.11167	3.26335	3.21565	2.92561	2.43497	3.26961	2.78312	3.63498	2.71353	2.86602	-0.00312429	3.00735	-0.0259423	0.97947	0.987485	-6.36137
DGLUCY	3.55079	3.67884	3.60262	3.58807	4.11812	3.96332	3.64726	3.35673	3.18965	3.15866	3.2867	3.66506	3.68878	3.84554	3.94338	4.092	3.87322	3.8095	3.73052	3.63151	3.58281	3.67111	3.59504	3.86503	2.63791	3.62603	3.50393	3.34365	3.54085	0.116867	3.61333	1.03454	0.30888	0.509012	-5.83477
DHCR24	2.51164	1.83901	2.02557	1.8519	1.72667	1.83901	2.03726	2.78662	2.05952	2.81466	1.56199	1.26611	1.83386	3.09206	2.12141	2.26937	1.92773	1.87175	2.42166	2.26241	1.97759	1.9715	2.32639	2.03726	1.79698	2.02024	3.25965	1.99923	2.37725	-0.101471	2.13401	-0.633706	0.530916	0.698453	-6.16183
DHFR	1.49805	1.16164	1.47261	1.49528	1.72085	1.72667	1.23317	1.93045	2.29312	2.63142	1.71637	2.0497	0.983302	0.760648	1.20343	0.966551	1.5367	2.11109	1.5807	1.64074	1.45315	1.486	1.42176	2.5226	1.49528	2.69464	2.82171	2.212	2.70015	-0.45989	1.74206	-2.46284	0.0195347	0.0878902	-3.59352
DHODH	2.46706	2.09945	2.16391	2.36032	2.41001	2.23865	2.29707	2.38912	2.27902	2.43775	2.16854	3.12534	2.06965	2.7699	2.23506	2.2838	2.14169	2.33639	2.33532	2.53315	2.3368	2.29659	2.57186	2.66052	2.03804	2.52289	3.18071	1.87623	2.28068	-0.0649036	2.37605	-0.597037	0.554814	0.71743	-6.18416
DHPS	2.83778	2.81389	2.72658	2.5809	2.6125	2.7087	2.86034	2.03663	1.88417	2.08719	1.9361	2.45479	2.98386	3.29073	3.20283	2.87615	3.20923	2.71007	2.80178	2.77342	2.81761	2.74494	3.2756	3.0376	2.70549	2.59043	2.94001	2.62696	3.09691	-0.190321	2.73183	-1.42228	0.16492	0.342725	-5.38077
DHRS1	2.85151	2.96577	2.8311	3.3412	3.29203	3.27112	2.99514	3.73526	3.33445	3.47853	3.3448	3.29009	3.55405	3.29357	3.80836	3.52585	3.39785	3.49596	3.24935	3.24544	3.19032	3.17157	3.17157	2.98199	1.63552	3.29482	2.48863	2.11369	2.88212	0.402311	3.14592	2.68088	0.0116526	0.0619316	-3.13331
DHRS12	2.74197	2.48162	2.1692	2.58013	2.56449	2.55563	2.39029	3.08989	2.90927	2.65168	1.84134	2.83136	2.6611	2.54166	2.81202	2.40633	2.50207	2.87339	2.78107	2.90792	2.78165	2.8849	2.72917	2.86465	2.0885	2.61314	3.59008	2.6075	2.64808	-0.208481	2.65862	-1.81448	0.0792821	0.217591	-4.79628
DHRS3	2.99991	2.71404	3.27981	3.18866	3.03634	3.1926	3.28408	3.09323	2.74422	2.87591	2.4642	3.27381	3.2855	3.57842	3.27605	3.2612	3.47661	3.12066	3.25361	3.13872	2.63006	3.1549	3.23633	3.79033	2.17682	2.50437	3.06727	2.39686	3.07519	0.157	3.05413	1.18405	0.245384	0.439985	-5.67513
DHRS4	2.44917	2.60331	2.32424	2.58325	2.43012	2.55966	2.70248	2.46538	2.10776	2.34551	2.19537	2.68462	2.30426	2.9494	2.42088	2.60249	2.61825	2.56449	2.71241	2.86579	2.38804	2.52362	3.07519	2.75045	2.26751	2.80889	2.65456	2.7369	2.85272	-0.192433	2.57058	-2.30485	0.0280285	0.109799	-3.91077
DHRS7	2.97152	3.30076	3.10376	3.33806	3.32713	3.04391	3.19786	3.22142	3.11081	3.57472	3.00622	2.86228	3.11167	3.37112	3.14833	2.50437	3.31846	3.4182	3.24397	3.54439	3.1745	2.88212	3.13017	2.6543	3.17514	3.16399	3.35673	2.90656	3.49643	-0.0310867	3.16065	-0.32508	0.747302	0.849143	-6.30885
DHX15	3.64805	3.52895	3.60195	3.54022	3.48658	3.63078	3.60805	2.94909	3.16975	3.49053	3.07867	3.17586	3.67286	3.54547	3.81424	3.52969	3.51926	3.56568	3.51061	3.53037	3.62186	3.52716	3.47962	2.97987	3.76629	3.54022	3.23609	3.64726	3.35599	-0.0100859	3.47417	-0.115906	0.908474	0.951483	-6.35498
DHX29	2.55232	2.78714	2.52452	2.29748	2.51609	2.45479	2.47227	2.2321	2.22833	2.41917	2.49512	2.82505	2.49915	2.84216	2.44451	2.35921	2.7699	2.05345	2.28816	2.3865	2.43803	2.80396	2.75442	2.76349	2.50437	2.12687	2.69877	2.46483	2.44819	0.0353138	2.49829	0.41674	0.679737	0.807364	-6.27494
DHX30	3.04391	3.08456	2.85151	2.79271	2.74967	2.98416	3.13232	2.88438	2.86602	3.01471	2.66648	3.38994	2.06085	3.04237	1.99842	2.37725	2.8863	2.89748	2.84103	2.98493	2.91159	3.0395	3.00098	3.16791	2.92941	3.30666	3.09599	2.9754	3.33407	-0.227145	2.90726	-2.03326	0.0506551	0.16125	-4.42088
DHX40	2.63764	2.88052	2.76962	2.50995	3.14712	2.59619	2.66768	2.97711	3.32873	2.7699	2.82838	2.47523	2.90977	2.7434	2.83189	2.67008	2.73768	2.3677	2.3975	2.63504	2.40421	2.68333	2.37485	3.21501	2.58737	2.09204	2.39648	2.34551	2.57784	0.286588	2.67441	3.082	0.00428872	0.0335529	-2.22736
DHX9	2.02342	2.50665	2.3895	2.0885	2.35669	2.31497	2.66079	2.50869	2.55365	2.45583	2.29398	2.1869	2.59532	2.44986	2.34887	2.24434	2.23677	2.23373	2.0446	2.33602	2.23019	2.36805	2.25147	2.29212	2.277	2.73543	2.22602	2.7321	2.34442	0.0263107	2.35469	0.347575	0.730506	0.839327	-6.3013
DIAPH1	3.60121	3.54842	2.92223	3.32461	2.92763	3.22557	3.59008	3.50046	3.11512	3.13741	3.34766	2.39284	2.97322	3.05227	2.75465	3.01521	2.95208	3.1527	2.71744	3.29927	3.43225	3.28215	2.99221	2.77558	3.76716	3.86503	2.45366	4.14905	3.27918	-0.123768	3.19125	-0.843801	0.405239	0.596589	-6.00912
DIAPH2	2.38562	2.2838	2.60695	2.71162	2.94728	2.80101	2.67036	2.99116	2.68358	2.73945	2.81735	2.22876	2.67747	2.87752	2.77209	2.86973	2.59901	2.50596	2.4729	2.64534	2.30716	2.53445	2.32467	3.2339	2.47107	1.94348	2.70391	2.35012	2.5014	0.186514	2.60887	1.9208	0.0639859	0.189388	-4.61801
DICER1	2.56272	2.68841	2.60837	2.61586	2.96	2.63791	2.58536	3.05714	2.63091	2.83478	3.00545	2.64838	2.72456	2.65958	2.73742	2.83942	2.58211	2.50016	2.63974	2.2774	2.63033	2.55465	2.4516	2.62696	2.69141	2.48195	2.29748	2.41712	2.52729	0.220134	2.63705	3.45349	0.00162145	0.0183209	-1.33185
DIDO1	2.67991	2.29522	2.19374	2.51698	2.26802	2.40751	2.25272	2.77851	2.78362	2.61674	2.35843	2.64589	2.52566	2.34319	2.50941	2.4905	2.42274	2.39387	2.41851	2.34402	2.53514	2.16854	2.073	2.39134	2.43113	2.34633	2.33846	2.34666	2.60837	0.109529	2.43049	1.57587	0.125197	0.288059	-5.16611
DIO2	2.07712	2.68547	2.82896	2.58296	2.49115	2.23019	2.37398	1.16164	3.71718	3.30483	1.55958	2.39467	3.36198	2.41308	2.88969	2.50467	2.67602	2.32424	2.64002	2.50736	2.5863	3.04416	2.68516	3.41368	2.29707	2.63336	1.64074	3.54783	2.21604	-0.0836911	2.57893	-0.402423	0.690132	0.813332	-6.28079
DIP2A	3.08409	2.99561	2.90592	3.01822	3.03402	3.41874	3.02657	2.70278	3.45097	3.25705	3.26923	2.83591	3.29357	2.48162	3.20923	2.91611	2.63233	3.14399	3.26443	3.13741	2.91821	2.9465	2.31288	3.05172	2.82636	3.08261	3.59694	3.19755	3.25156	-0.0295551	3.04352	-0.274768	0.785316	0.876105	-6.32393
DIP2C	3.13741	3.11393	3.25867	3.15866	3.22055	3.3295	3.12809	2.53071	3.09787	3.04237	2.51823	3.06559	3.39581	2.70496	3.57661	3.17389	2.93126	3.13596	3.27189	3.26547	3.16233	3.07956	2.78714	3.47059	3.56767	3.24604	3.57472	2.93663	3.08353	-0.133709	3.13675	-1.33168	0.192666	0.377373	-5.49837
DIXDC1	3.95427	3.21438	2.74368	3.09871	3.09046	2.68165	2.99396	2.87772	2.92862	3.03634	3.49689	3.01949	2.72305	2.93382	2.55563	2.92616	2.66901	2.53036	2.71827	2.0809	2.40191	2.22833	2.12387	2.85849	1.95759	1.76681	3.6808	3.09257	3.38994	0.427542	2.81978	2.57911	0.0148683	0.0729765	-3.3512
DKC1	2.89115	3.01919	2.77185	2.63764	2.80505	2.71241	2.74172	2.38333	1.96476	2.29489	2.32969	2.81708	2.72331	2.87315	2.55532	2.93456	2.84558	2.52566	2.77119	2.63903	2.69991	2.70601	3.02505	2.82975	2.90621	3.1773	2.85384	3.00691	2.68256	-0.153871	2.72842	-1.6451	0.110044	0.265988	-5.06327
DKK3	3.77454	4.16806	3.83381	3.6771	3.40684	3.21953	3.47804	3.46536	3.42685	3.78002	3.62328	3.42685	3.02565	3.72693	3.53372	3.06195	3.65501	3.90888	3.32251	3.80836	3.99836	3.39581	3.12955	2.7095	3.17389	3.10856	4.95646	3.11142	4.87053	-0.0783968	3.57853	-0.432865	0.668107	0.798637	-6.26812
DLAT	3.66109	3.67545	3.7456	3.25082	2.93891	3.47906	3.55797	3.0052	3.41925	3.17954	3.68878	3.98813	2.53852	3.3954	3.26197	3.15706	2.98805	3.48318	3.39406	3.55079	3.78319	3.91396	3.54439	3.59367	3.50393	3.15825	3.15587	3.48792	4.34628	-0.227419	3.44298	-1.7776	0.0852727	0.228049	-4.85623
DLC1	3.17389	3.10714	3.21605	2.95131	3.14399	3.30736	3.14146	2.9663	3.22307	2.81007	3.03788	3.16654	2.99746	3.01521	3.41724	2.87672	3.28967	2.96162	3.66776	3.0661	3.23276	3.36946	2.79198	3.61355	3.02744	3.03835	2.94622	3.29629	3.34859	-0.0883609	3.14488	-1.05403	0.300007	0.499066	-5.81509
DLD	4.26861	4.27259	4.52242	4.11555	4.04454	4.18938	4.1869	4.27259	4.4309	3.55797	4.55864	4.15142	3.41229	3.91008	4.20751	3.98813	3.80374	4.19649	3.83381	3.93075	4.25237	4.26064	3.63078	4.24965	3.36336	4.19908	3.61988	4.02411	3.47103	0.19204	4.0319	1.633	0.112576	0.269837	-5.0815
DLG1	3.14207	3.05259	2.77094	2.44819	2.30675	2.3227	2.69629	2.23865	2.68637	2.29172	3.07836	2.15569	2.35268	2.5863	2.34402	2.8839	2.79562	2.1187	1.95339	2.3991	2.60331	2.7434	2.23412	2.51698	2.33486	2.91025	2.73103	2.83891	2.99036	0.0660244	2.5699	0.552131	0.584814	0.738705	-6.20974
DLG3	2.63006	2.47493	2.38912	2.55297	2.43955	2.43497	2.37164	2.74028	2.47588	2.55265	2.70627	2.2081	2.55501	2.32064	2.48597	2.20636	2.54584	2.42166	2.55966	2.65958	2.45513	2.56175	2.37398	2.36394	2.60359	2.42519	3.5323	2.16159	3.08488	-0.124376	2.52736	-1.25075	0.220375	0.410903	-5.59758
DLG5	2.58944	3.09046	2.36109	2.53971	2.68951	2.53382	2.68951	2.10448	2.70627	2.54811	2.82036	2.58325	2.23728	2.17902	1.96476	2.10719	2.07712	2.07433	2.12687	2.10897	2.12801	2.30607	2.14123	2.39686	3.29285	2.7492	2.67939	3.03525	2.74368	-0.0218111	2.46911	-0.16787	0.867775	0.92801	-6.3476
DLGAP4	3.35973	3.71637	3.342	3.52103	3.05	3.37979	3.27038	2.19102	3.20859	2.73022	3.44215	3.2985	3.3572	3.27884	3.23743	3.64156	3.83228	2.8849	2.70248	2.8362	3.37485	2.89854	3.37535	3.01052	2.68358	2.92963	2.90713	3.16592	2.56955	0.340825	3.14468	2.77175	0.00934043	0.0541024	-2.93442
DLST	3.23177	3.75889	3.38393	3.52532	3.45596	3.18363	3.374	3.38393	3.19755	3.05136	3.28283	3.75206	2.98441	3.39875	2.94024	3.50573	2.54128	3.22803	3.46735	3.26812	3.45295	3.28325	3.3662	3.83619	3.32995	3.28894	2.99221	3.05669	3.54966	-0.0520226	3.3128	-0.506148	0.61633	0.762097	-6.23389
DLX4	2.90683	2.49322	2.76634	2.84505	2.5997	2.84607	2.68279	2.65652	3.36454	3.15951	2.93663	2.11038	3.86503	2.84707	3.23426	3.83855	3.067	2.74967	2.78885	3.04075	2.84019	2.8489	2.70496	2.05345	2.0462	2.23373	3.02113	2.24828	2.7609	0.34267	2.81229	2.27505	0.0299637	0.113632	-3.96898
DMAC2	3.81424	4.09594	4.00798	3.29246	3.56436	4.08171	3.80038	3.68957	3.5179	3.57169	3.43596	4.37551	3.09449	3.42407	3.24282	3.51852	3.33286	3.9167	3.64884	3.92627	4.04093	3.95072	3.54547	3.77142	4.02575	3.25011	4.29577	3.65426	4.32998	-0.224168	3.73161	-1.82469	0.0776893	0.214723	-4.77952
DMAC2L	2.81735	3.38027	2.93126	2.83564	2.70278	2.50631	2.80794	2.58244	2.27396	2.66464	3.34365	3.77351	2.41058	3.18363	2.75045	2.64559	2.93634	2.75022	2.5141	2.89251	2.66295	3.13165	3.10136	2.27902	2.26422	2.93204	2.33602	3.18773	3.011	0.100432	2.81411	0.750613	0.45854	0.644604	-6.08202
DMD	2.62255	2.711	2.69225	2.70897	2.81952	2.67691	2.56955	2.52145	2.53885	2.07919	2.93157	2.4958	3.06139	2.80764	2.84607	2.73667	2.74579	2.69523	2.34514	2.69706	3.01551	2.55852	2.42874	3.06114	2.31234	2.60777	3.02964	2.75553	2.81366	-0.0130528	2.68571	-0.144748	0.885846	0.937418	-6.35122
DMPK	4.03691	4.00017	3.80494	3.45295	2.87702	3.49596	4.22627	2.21406	2.56955	2.69741	2.9318	2.99889	3.7652	3.9937	3.89415	4.25785	3.96884	3.50772	3.29962	3.59504	3.71475	4.08555	4.49197	3.31886	3.46084	3.50987	4.00342	3.79915	3.42499	-0.202804	3.56543	-1.04334	0.30485	0.504199	-5.82592
DMTF1	2.87949	2.96428	3.03374	3.11224	2.96887	3.07931	2.74309	3.22834	3.41105	3.04721	3.21859	2.59647	3.30114	2.8158	3.12175	3.67884	2.89378	3.0832	2.968	2.91104	2.89748	2.48827	2.22557	2.98386	2.78211	3.13961	2.45445	2.47588	2.46538	0.32478	2.92996	3.10848	0.00400685	0.0325616	-2.16515
DMXL1	2.41789	2.5034	2.27259	2.42203	2.73185	2.1452	2.19267	2.8375	2.55763	2.61056	2.74691	2.68983	1.9769	2.34633	2.183	2.2563	2.64618	2.61586	2.63848	2.50376	2.78785	2.21564	2.53382	2.30716	2.73998	2.42166	2.56055	2.64474	2.74225	-0.115973	2.49133	-1.34041	0.189843	0.37332	-5.48733
DNAAF2	2.14288	2.48565	2.30078	1.6609	2.02826	1.81718	2.23821	2.23614	2.05486	2.16758	2.06031	2.59444	1.82788	2.12445	1.75125	1.85606	1.96924	2.04574	2.06151	2.09456	2.1568	2.1486	2.2799	2.31589	2.58818	2.30123	2.38409	2.51236	2.68892	-0.220729	2.16875	-2.41526	0.0218051	0.0937721	-3.69056
DNAJA1	3.80494	3.77672	3.96332	3.58281	3.56767	3.51852	3.52895	3.70248	3.34523	3.6323	3.77142	3.2202	3.19561	3.04752	3.42447	3.10259	3.1688	3.64371	3.50271	3.04885	3.2756	3.45596	2.90464	2.86396	4.17307	3.32669	3.22629	3.88654	4.10004	0.0407145	3.47454	0.317923	0.752673	0.853113	-6.31115
DNAJA2	3.24604	3.20631	3.26632	2.55011	2.71479	2.8151	2.95817	3.19168	2.75817	2.99746	3.18503	3.27267	2.40896	3.09871	2.47253	2.49021	3.01771	2.89066	2.89829	2.78563	2.9702	3.39098	2.80867	3.21324	2.85069	3.18809	2.7876	2.75634	3.23148	-0.0604022	2.94558	-0.587312	0.561244	0.721977	-6.18987
DNAJA3	3.44997	3.50772	3.69388	3.47261	3.38945	3.54615	3.57731	3.20923	3.29556	3.23316	3.12444	3.98303	3.06907	3.45343	3.2287	3.32591	2.99915	3.47535	3.41976	3.61988	3.67203	3.61862	3.755	3.81701	3.6497	3.06139	3.36336	3.37356	3.51995	-0.14299	3.44498	-1.60611	0.118379	0.279325	-5.12164
DNAJB1	3.05136	3.13266	3.35599	3.14771	3.09177	3.30896	2.93788	3.07291	3.0395	3.30217	3.13995	3.12119	2.64503	2.81984	2.6295	2.67254	2.89574	2.74028	2.83427	2.68462	2.76938	2.7369	2.74522	3.05198	3.22341	2.72786	2.93157	2.92718	3.04752	0.153105	2.9581	1.88951	0.0681978	0.197498	-4.6713
DNAJB12	3.14329	2.70103	2.51378	2.90869	2.6295	2.66924	2.81928	2.42597	2.50167	2.61082	2.34442	2.57986	2.47933	2.66515	2.66567	2.34887	2.78714	2.56115	2.4373	2.58878	2.56207	2.82094	2.76747	2.57546	2.92984	2.82036	2.96826	3.24466	3.00489	-0.138506	2.69224	-1.62173	0.114979	0.273788	-5.0984
DNAJB2	3.1133	3.14795	2.76324	2.72574	2.76776	2.7987	2.8151	2.47465	2.6977	2.66619	2.69741	2.70044	2.79562	2.99396	2.94455	3.04275	2.77669	2.66619	2.90683	2.99274	2.63791	2.99965	2.86065	2.95425	2.96604	2.68819	2.81389	3.32206	2.81466	-0.0663281	2.84637	-0.900084	0.375008	0.572618	-5.96116
DNAJB4	4.22356	3.95306	3.87614	3.25393	3.09954	3.45542	3.41976	3.46326	3.18704	3.17546	3.94779	3.23817	2.86034	3.03586	3.21748	3.43634	3.34365	3.12207	3.02587	2.80128	3.49277	3.24189	2.88849	3.85455	3.50209	3.00646	2.99396	3.45343	3.49689	0.182774	3.34712	1.41871	0.165949	0.343694	-5.38553
DNAJB5	3.7948	3.20701	3.19786	3.28283	2.52566	3.27853	3.37847	1.77551	2.91898	2.09812	1.98537	2.98122	3.13232	3.277	2.86096	2.9526	3.25118	3.14771	3.44532	3.49483	3.17615	3.56095	4.03893	3.53311	3.24635	4.06115	3.07394	4.16343	3.86917	-0.632383	3.19688	-3.63371	0.0009983	0.0142977	-0.88164
DNAJB6	2.58602	2.61056	2.53349	2.2778	2.10968	2.38065	2.43359	2.05345	2.42661	2.29748	2.40524	2.10508	2.62638	2.62024	2.64149	2.55563	2.52729	2.20108	2.17419	2.23506	2.43012	2.25763	2.63951	2.24434	2.50167	2.30675	2.63393	2.38689	2.45256	0.051003	2.40188	0.688267	0.496398	0.673961	-6.12621
DNAJB9	2.94398	3.20258	3.55405	2.98386	2.6081	2.91557	3.11878	2.18474	2.72786	2.45652	2.7808	3.00945	2.7095	3.26197	2.81649	2.4664	2.83296	2.84049	2.52417	3.01412	2.63206	3.26335	3.05365	2.48339	3.55479	3.51852	2.75876	3.49689	3.12291	-0.164653	2.9254	-1.26732	0.214469	0.404532	-5.57772
DNAJC11	3.03188	2.90492	3.2238	3.05	3.01252	3.22803	3.19911	2.54456	2.92168	2.53071	2.67376	3.30299	3.20223	3.20415	3.24979	3.24725	3.13651	3.0123	2.91949	3.13526	3.15525	3.11669	2.99514	3.24214	3.06785	2.7959	3.09227	2.98072	3.01412	-0.00487383	3.04107	-0.059917	0.952606	0.972499	-6.35991
DNAJC13	2.71296	3.07653	3.12896	2.72809	2.83796	2.95874	2.47253	3.16851	2.65115	2.38804	2.62749	2.41561	3.4182	3.31846	3.192	3.24027	3.36009	2.99588	2.89224	2.69629	3.09257	2.87975	3.00461	3.37356	2.52535	1.94184	2.7997	2.22081	3.0832	0.131121	2.86901	0.975592	0.336811	0.535305	-5.89221
DNAJC15	3.68594	3.33041	3.58281	3.49544	3.48947	3.48792	3.74381	3.79033	3.80618	4.00017	4.22627	3.38618	3.07177	3.20923	3.29705	3.26197	3.55608	3.63371	3.50209	3.64726	3.38184	3.52469	3.19393	2.57517	3.00668	3.47159	3.49432	3.12649	3.53311	0.213271	3.46593	1.88061	0.069439	0.1995	-4.68634
DNAJC16	2.57723	2.42907	2.51282	2.44689	2.28564	2.42479	2.43215	2.4606	2.47396	2.3448	1.92674	2.321	2.76185	2.61734	3.44469	2.58035	2.56893	2.46972	2.45893	2.4853	2.42661	2.44854	2.52005	2.28105	2.36805	2.42661	2.92147	2.33446	2.45125	0.0403992	2.48969	0.419595	0.677672	0.806316	-6.27375
DNAJC2	3.13685	2.83891	2.8995	3.30337	3.27038	3.13712	2.92198	2.91052	2.87726	2.79895	3.02089	2.95342	2.73395	3.04001	2.70103	3.08965	3.12809	2.8149	3.02259	2.97902	2.57957	3.11607	3.12444	2.50408	3.46326	3.21565	2.61163	3.16084	2.75712	0.0402303	2.96935	0.449604	0.656121	0.789633	-6.26077
DNAJC24	3.42595	3.30736	3.66183	3.49931	3.45974	3.65857	3.40161	3.44172	3.43323	3.47535	3.58421	3.62603	3.24834	3.42357	3.20415	3.1923	3.41189	3.72975	3.30934	3.61294	3.2612	3.50333	3.20385	3.44532	3.41268	3.04789	3.27773	3.06114	3.4587	0.078215	3.40617	1.09763	0.280812	0.47867	-5.76983
DNAJC4	2.34133	2.61434	2.45225	2.3368	2.06965	2.24525	2.51698	2.18804	2.06277	2.03893	2.2102	2.66833	2.321	2.46088	2.39317	2.55297	2.18637	2.39541	2.3811	2.57216	2.60055	2.50557	2.92542	2.81062	2.25679	2.36881	3.15983	2.551	2.7925	-0.277081	2.44755	-3.15784	0.00352802	0.0302285	-2.04852
DNAJC6	2.55665	2.94676	2.95926	2.95477	2.75096	2.48795	2.43565	2.55465	2.48733	2.24915	2.28519	2.07635	2.4509	3.0395	2.45331	2.32467	3.09227	2.5141	2.19598	2.48038	2.37164	1.58932	2.72786	2.79429	2.43691	2.35884	3.49328	1.95083	2.82117	0.116548	2.5462	0.83065	0.412517	0.603395	-6.0199
DNAJC8	2.82478	2.73283	2.91664	3.00292	2.94622	3.08663	2.71722	2.60382	2.70496	2.75396	2.91359	2.80694	2.69797	2.92083	2.60906	2.56697	2.96428	2.67283	2.90414	2.85435	2.61586	2.76324	3.01252	2.85711	2.63336	3.11479	2.91922	2.75789	2.91821	-0.0253162	2.82045	-0.386806	0.70154	0.818463	-6.28693
DNAL4	2.41094	2.61854	2.68721	2.72704	2.6582	2.90792	2.61879	2.53667	2.37997	2.47681	2.55599	2.7987	2.76437	3.03119	2.90276	3.50987	2.72518	2.69706	2.54543	2.81842	2.78685	2.69932	2.72489	2.86729	2.351	2.55966	2.81466	2.47328	2.50995	0.0701416	2.6951	0.783377	0.439344	0.627136	-6.05732
DND1	2.39989	2.47197	2.21142	2.54295	2.28477	2.26241	2.1692	2.85577	3.00545	2.68744	2.56955	2.42792	3.00206	1.76998	2.74252	2.24625	1.9361	2.30123	2.46352	2.3822	2.17142	2.27557	1.74762	2.39721	2.21498	2.66515	2.21406	2.43327	2.61022	0.123178	2.39525	1.08016	0.288393	0.486876	-5.78816
DNM1L	2.98199	3.04237	2.92302	2.8144	2.72375	2.67778	2.96162	2.87128	2.68841	2.74832	2.65847	2.79738	2.81202	2.72279	2.63819	2.80018	3.25469	2.52452	2.43846	2.56543	2.84505	2.69061	2.52695	2.81112	2.71592	3.05781	2.58182	2.69436	2.67908	0.152798	2.76717	2.21299	0.0343846	0.124089	-4.08848
DNM2	2.58764	2.86317	2.50596	2.49223	2.34015	2.50906	3.011	2.41453	2.09456	2.33532	2.14636	2.45652	2.94834	3.06025	2.72546	3.0395	2.8156	2.73077	2.48129	2.88752	2.72704	2.92361	3.23505	2.38254	2.7922	2.4488	2.90464	2.73493	2.88186	-0.152286	2.67158	-1.44073	0.159675	0.336831	-5.35598
DNM3	2.24434	1.87736	1.70326	1.92511	2.04212	1.8795	1.72543	2.38409	2.64924	2.73791	1.86203	2.52904	2.351	1.69787	2.35884	2.37079	2.32142	1.91639	2.07844	1.9844	2.28564	2.02826	2.03893	2.56148	1.53101	1.62529	1.9607	2.08781	2.28816	0.124222	2.10503	1.05982	0.297407	0.496406	-5.80917
DNMBP	2.99561	2.71534	2.92459	3.07681	2.87396	3.00885	3.04075	2.80921	2.92302	2.72684	2.37959	3.16761	3.30152	3.05536	3.01052	2.81466	2.86653	3.25469	2.95232	3.01843	2.98416	2.83347	2.90927	3.13961	2.88777	2.99348	2.56543	3.36454	2.87519	-0.058544	2.94721	-0.715784	0.479477	0.660583	-6.10716
DNPEP	2.64032	2.70577	2.6028	2.62389	2.65115	2.91159	2.6639	2.88935	2.59506	2.69523	2.62609	2.69302	2.72249	2.76585	2.94102	3.07519	2.53945	3.22436	2.71325	3.03256	2.75488	3.05172	3.06785	2.93043	2.68892	2.72751	2.54456	2.9494	2.94887	-0.160183	2.79229	-2.28018	0.0296217	0.112798	-3.95899
DNPH1	2.93891	2.70448	2.70044	2.86492	2.89378	2.68046	2.68256	2.91411	2.21877	2.55792	2.84155	2.61796	2.46456	2.73643	2.66269	2.84301	3.37305	2.80071	2.82947	2.5997	2.88136	2.91732	3.42685	3.2974	1.91729	2.95342	2.97123	2.56148	2.88543	-0.0900071	2.78404	-0.790701	0.43512	0.623529	-6.05166
DNTTIP2	3.25432	2.93942	2.96826	3.45143	3.11607	3.0667	3.03711	2.7369	2.74028	2.87519	2.83849	2.89772	2.87726	3.16654	2.8032	2.89086	3.22629	3.11107	2.94594	3.22081	2.75964	3.04333	3.06248	3.18704	3.65757	3.34282	2.69089	3.03503	2.96329	-0.0916944	3.03124	-1.0532	0.300383	0.499387	-5.81594
DOCK1	3.23075	3.28024	3.35495	3.45923	3.28408	3.52469	3.64652	3.44357	3.74807	3.47303	3.3233	3.61988	3.46693	3.0115	3.34811	3.50458	3.6143	3.69637	3.04075	3.25507	3.69914	3.29316	3.17418	3.25588	3.1527	3.31886	2.42558	3.12175	2.95791	0.232117	3.33535	2.39998	0.0225837	0.0962486	-3.72145
DOCK4	2.66833	2.85684	2.61759	2.31666	2.29659	2.73332	2.58152	3.043	2.85248	3.06967	2.86678	3.01075	2.21241	2.06341	2.1452	2.49257	2.03435	2.67837	2.68547	2.11682	2.43846	3.04819	2.57429	2.18804	3.05	3.23316	2.35179	2.81037	2.63336	-0.0706072	2.6093	-0.551269	0.585397	0.7391	-6.21021
DOCK6	2.88681	2.7881	2.5226	2.89634	2.77185	2.85297	2.77851	1.34383	2.7881	2.02741	1.91982	2.35268	3.11908	2.80867	3.27112	3.42146	2.8042	2.75129	2.80293	2.81366	2.82478	2.85272	3.1614	3.02933	3.04451	3.06387	2.59271	3.31929	2.90145	-0.261969	2.77626	-1.73996	0.0917771	0.238997	-4.91638
DOCK9	2.7808	3.12564	3.03188	2.98918	3.04212	3.56568	3.11908	2.71983	2.79763	3.22557	3.00206	2.23677	3.44357	2.77612	3.93619	3.28325	3.10443	2.62473	2.75045	3.03525	2.64949	2.4783	2.38409	2.88212	2.72627	3.02887	2.45256	2.85464	2.77903	0.348917	2.92502	2.9315	0.00628303	0.0424552	-2.57551
DOHH	1.98279	2.88777	2.62057	2.86579	2.68819	2.61908	3.03256	2.22516	1.85288	2.61405	2.60382	2.44118	2.80889	3.05669	2.67991	2.55905	2.68612	2.78563	2.27078	2.98774	3.07122	2.98774	3.21207	3.02323	3.06876	2.90977	2.90848	2.66052	2.82838	-0.291419	2.72203	-2.628	0.0132327	0.0671862	-3.24717
DOK5	3.50333	4.03498	3.71537	3.68502	3.69559	3.64371	3.70331	3.09177	4.31973	3.46136	4.52731	3.36156	3.25082	3.64571	3.9167	4.84176	3.9937	3.36709	2.78029	3.71537	3.80141	3.32013	3.65574	2.89137	1.79194	3.37444	4.00017	2.3183	2.77318	0.638628	3.52349	3.27288	0.00261474	0.0248401	-1.77318
DOLPP1	3.067	2.66648	2.9037	3.25244	3.1825	2.93867	2.99828	3.22471	2.95846	3.3448	3.20063	3.57104	2.85897	2.84913	2.81735	3.06996	2.73309	3.13017	2.96086	3.2563	3.35338	2.8991	2.87567	3.25082	2.83369	2.81788	3.10935	2.70496	2.82862	0.035748	3.02269	0.407021	0.686786	0.81167	-6.27893
DONSON	1.52372	1.72085	1.74091	1.85494	1.82672	1.84657	1.86849	1.43616	2.21982	1.68321	1.57846	1.60403	2.17682	2.08291	2.33446	1.90642	2.57603	1.98279	1.87623	1.96411	1.66683	1.7799	1.9607	2.42696	2.60721	1.88417	2.19598	2.01527	1.84657	-0.13602	1.93749	-1.24108	0.223877	0.41348	-5.60906
DOP1B	1.90016	1.6609	2.11624	1.91808	1.73513	1.91639	1.88744	2.38152	1.74404	1.24732	1.27247	2.62584	1.65355	1.76681	1.79583	1.86655	1.90549	1.97941	2.30123	1.95083	1.94723	2.34174	2.71698	2.72227	2.58536	2.52005	1.89224	2.78107	2.66329	-0.520115	2.06191	-4.17276	0.000225154	0.00565257	0.51121
DPAGT1	2.34402	2.54066	2.75664	2.32934	2.36066	2.61434	2.65733	2.49548	2.3925	2.17296	2.47653	2.42661	2.82616	2.90592	2.74494	2.79763	2.77903	2.89693	2.768	2.62696	2.60082	2.88186	3.14922	2.64808	2.81708	2.13112	2.87889	2.55331	2.62057	-0.148476	2.62737	-1.67132	0.104716	0.257911	-5.02335
DPF2	2.84835	2.85518	2.97247	3.03479	2.87156	2.84815	3.02396	2.51823	0.94637	1.25373	1.4186	3.43363	4.10868	2.83871	3.4141	3.33331	3.47764	2.70672	2.98361	2.88261	2.81649	2.7065	3.68689	3.40567	3.16468	1.87062	3.11023	3.19067	3.23357	-0.203534	2.86054	-0.810909	0.423594	0.613182	-6.03579
DPH5	2.57749	2.46127	2.58764	2.49548	2.56575	2.58013	2.5014	2.2439	2.07488	2.10649	2.54641	2.86526	2.35759	2.92718	2.67747	2.67991	2.72331	2.50529	2.35998	2.6022	2.56635	2.49717	3.09897	3.1233	2.43259	2.22876	2.68579	2.0497	2.73824	-0.0462891	2.54689	-0.454944	0.652317	0.787346	-6.25836
DPM1	3.15559	3.48318	3.34282	2.94301	3.37979	3.17876	3.00433	2.71296	3.14795	3.08989	3.18013	3.33041	3.16761	3.32461	3.20318	2.95533	3.44997	2.98096	2.88186	3.01718	3.27304	2.9864	3.16084	3.65193	2.93126	2.97961	2.40792	2.64385	2.87209	0.197138	3.09781	2.069	0.0469627	0.152543	-4.35645
DPM3	2.57658	2.74661	2.72427	2.46511	2.82505	2.68075	2.9443	2.92815	2.50596	2.58944	2.53099	2.5141	2.77583	2.72089	2.70044	3.067	2.74392	2.38804	2.7876	2.23171	2.41233	2.52629	2.81062	2.85818	2.29047	2.87156	2.69797	2.42384	2.06673	0.177755	2.63465	2.09928	0.044022	0.146373	-4.3012
DPP6	2.49613	2.36144	2.31288	2.59476	2.39785	2.58127	2.3318	2.40896	2.43885	2.09945	2.49188	2.20325	3.19634	3.00121	2.9864	2.86705	2.84607	2.52112	2.56513	2.64316	2.7434	2.45893	2.67376	2.25727	2.27557	2.78913	2.80344	2.25272	2.02024	0.0653016	2.5386	0.60762	0.547861	0.713474	-6.17785
DPP8	3.08353	3.50333	3.28024	3.41643	3.60121	3.45498	3.43503	3.52046	3.34859	3.30299	3.48156	3.7234	2.94728	3.05136	2.88709	3.13198	3.22471	3.3356	3.47804	3.77023	3.44997	3.48792	3.17586	2.99721	3.43913	3.50458	3.19032	3.72228	3.53715	-0.10672	3.36146	-1.1982	0.239909	0.432758	-5.65899
DPY19L1	2.43215	2.52325	2.46788	2.52763	2.38184	2.42792	2.89547	2.39134	2.45921	2.07778	2.68224	2.74633	1.79447	2.24434	2.35511	1.81605	2.48301	2.55232	2.47227	2.52874	2.69464	2.22974	2.35179	3.1825	2.91821	2.64897	3.04237	2.73043	3.23505	-0.321114	2.52735	-2.85237	0.00765558	0.0476008	-2.75472
DPY19L4	2.72331	2.68333	2.60055	2.852	2.66901	2.7031	2.83323	2.7621	2.67552	2.6977	2.8882	3.32052	1.89725	2.24148	2.00729	2.11369	2.30757	2.47328	2.67195	2.5097	2.47227	2.51164	2.32707	3.27981	2.93577	2.7699	2.66052	2.65996	3.6323	-0.155198	2.65104	-1.15225	0.258018	0.454449	-5.71074
DPYD	2.12317	2.20061	2.52874	1.98361	2.86818	2.42597	2.05267	3.49168	3.04544	3.05	3.15023	3.70787	2.55599	2.22753	2.50376	2.52202	1.81605	2.85323	2.888	1.99616	2.44751	1.84451	1.98203	2.277	2.1187	2.2838	1.72395	2.08291	2.02418	0.392983	2.44053	2.28758	0.0291357	0.111649	-3.94457
DPYSL4	3.06165	3.60999	2.47227	1.07701	1.04408	2.38804	2.0885	1.66683	1.39089	1.74526	1.77163	3.2147	1.67686	2.72684	2.15628	2.14348	2.64534	2.58268	1.77163	2.63584	2.92333	2.93634	3.15236	2.81085	2.31748	3.20631	3.02933	3.02909	2.87396	-0.603044	2.41893	-2.7312	0.0103135	0.0575046	-3.02366
DR1	2.69089	2.63927	2.74607	2.557	2.76465	2.54095	2.57899	2.97072	2.80587	2.80587	3.12838	3.00489	2.25763	2.48236	2.33403	2.46538	2.29707	2.65084	2.40146	2.33486	2.91683	2.76293	2.53618	2.30247	2.86549	2.61226	2.96577	2.86201	2.60931	-0.000524209	2.65139	-0.00565617	0.995523	0.997169	-6.36169
DRAM1	2.40231	2.26802	2.718	2.75237	2.47076	2.77049	2.5365	3.18428	3.30847	2.49742	3.08912	1.86282	3.16497	2.66543	2.25845	3.08184	2.75208	3.12619	2.83564	2.23614	2.80867	3.23997	2.84324	1.95264	3.52349	2.72943	2.29355	2.98918	2.10719	-0.0306408	2.70582	-0.19671	0.845337	0.915698	-6.34234
DRAP1	3.06055	3.41049	2.80236	3.26712	2.98747	3.05491	3.2707	3.02708	2.48099	2.35811	2.57808	2.82478	2.96911	3.29927	3.06165	3.29391	3.31311	3.1784	3.22436	3.2985	3.05469	3.22176	3.62913	3.09929	3.02909	3.26369	3.18839	3.17349	3.20063	-0.209941	3.09038	-2.14423	0.039957	0.136646	-4.21808
DRD2	2.5106	2.15982	2.17419	2.45755	2.09335	2.34599	2.04212	1.60403	1.17074	2.80449	1.71328	2.00954	2.28768	2.53099	4.04274	2.49809	2.58351	2.27821	2.183	2.43775	2.21241	2.19426	2.50207	1.94184	1.91808	3.08684	2.31864	3.18013	2.08914	-0.066056	2.32314	-0.346487	0.731315	0.8394	-6.30168
DRG1	3.53838	3.52643	3.67545	3.70708	3.62748	3.80038	3.5323	2.90927	3.05444	3.13961	3.10205	3.5123	2.9702	3.91516	3.41147	3.21748	3.55273	3.53668	3.66109	3.85455	3.40161	3.49053	3.84328	4.04454	3.44265	3.49689	3.539	3.55029	3.63907	-0.201942	3.50663	-2.01892	0.0522066	0.164177	-4.44649
DROSHA	2.43955	2.8272	2.6057	2.50832	2.90621	2.61825	2.63091	2.72354	2.48493	2.50498	2.64702	2.68819	2.64351	2.61796	2.62584	2.80889	2.95232	2.49115	2.33446	2.81536	2.64838	2.66596	2.74225	2.76611	2.61796	2.36358	2.55563	2.47427	2.97433	0.0399984	2.64423	0.581167	0.565326	0.723984	-6.19342
DSC1	0.924913	1.43616	1.6425	2.30757	1.7907	0.11114	2.71898	2.11624	1.55228	2.93357	2.86526	1.38753	2.17191	2.60103	2.37725	2.61133	2.70704	1.59589	1.0296	1.98692	1.93516	2.10649	2.44648	1.94723	0.412194	1.35171	3.76019	1.33876	1.55228	0.226449	1.92132	0.806573	0.426051	0.615269	-6.03922
DSC2	2.22414	2.38409	2.33041	1.72956	1.83789	1.95181	2.19635	2.19489	1.88081	1.773	2.20636	2.76501	1.64927	1.86203	1.89434	1.87062	2.54166	2.34442	2.04906	2.15365	2.16034	2.89979	1.612	3.13232	2.82223	2.65243	2.85952	2.5498	2.60382	-0.410603	2.24592	-3.06092	0.0045264	0.0345209	-2.27667
DSE	2.13778	2.64385	2.56272	2.79048	2.71534	2.40459	2.61993	3.34159	3.08434	3.39785	3.31808	2.32934	2.72427	2.15094	2.11933	2.25763	2.38035	2.37398	2.49878	2.46199	2.20917	2.61345	2.17419	2.0331	2.59136	2.3712	2.58013	2.84301	2.33222	0.222242	2.55383	1.69684	0.0997376	0.250746	-4.98399
DSG2	2.85769	2.97433	3.38742	3.22239	3.12745	3.25244	3.32911	2.46277	2.44154	2.58296	2.75157	3.48947	2.2203	3.59091	2.84372	2.87702	3.5521	3.33445	2.95817	3.42357	3.12175	3.23148	3.05642	4.03102	3.21748	2.71162	3.68327	2.84244	3.87172	-0.292447	3.11885	-1.95396	0.0597706	0.181072	-4.56079
DSP	3.97708	3.34398	4.37551	3.78104	3.72784	4.29884	4.49197	3.33374	3.45343	3.721	3.52279	4.2437	3.86379	4.19908	3.92767	3.9167	4.56512	4.62019	4.43545	4.45466	4.48603	4.60506	3.95577	4.55257	4.2552	3.61645	4.15142	3.72613	4.25237	-0.333201	4.06395	-2.46361	0.0194995	0.0878043	-3.59193
DST	4.10868	4.02575	4.05919	4.08171	3.78922	3.97041	3.97569	3.35639	4.1068	3.61224	4.12007	3.53095	3.86776	3.78212	3.78212	3.66183	3.72228	3.77023	3.58421	3.60999	3.82434	3.9465	3.14627	4.50718	3.31113	3.2563	3.61509	3.98303	3.80494	0.159469	3.79008	1.44914	0.157329	0.333865	-5.34459
DSTN	4.48118	4.50264	4.43545	4.33568	4.27259	4.34254	4.32259	4.15142	4.17591	4.21224	4.25237	4.45928	3.85039	4.05919	3.82434	3.93324	4.05058	4.49197	4.25785	4.50718	4.66043	4.573	3.87734	4.08328	4.21005	4.35339	4.00183	4.26064	4.49197	-0.0986875	4.25623	-1.12363	0.269787	0.46718	-5.74202
DSTYK	1.94629	2.05781	2.03125	2.0865	1.9233	1.86094	2.17467	1.81489	1.85091	1.88307	1.75429	2.02642	2.44718	2.32306	2.49512	2.44154	2.75442	2.00892	2.17361	2.073	1.7742	2.23908	2.23064	2.38152	1.97855	1.93699	2.32969	2.20578	2.35511	-0.0304914	2.12272	-0.318424	0.752297	0.852926	-6.31099
DTNA	2.85384	3.1176	3.0305	2.84275	2.86774	2.93761	2.96428	2.13289	2.07433	2.12317	2.85544	2.50309	3.04661	3.3624	3.25082	3.18175	3.23849	3.23817	2.90172	3.08291	3.12147	3.32499	3.16687	3.58281	2.95757	3.09871	3.23535	3.08208	3.08912	-0.310737	2.97466	-2.54051	0.0162894	0.0771728	-3.43245
DTNB	2.35547	2.02891	1.96756	2.00153	1.80369	2.01803	2.2203	2.4366	3.03432	2.45366	2.52083	2.03435	1.85992	2.50832	2.42696	2.30159	1.38753	2.08358	2.1187	2.27436	2.1155	2.06085	1.73353	2.48301	2.01724	2.25326	2.09812	2.49613	2.3171	0.0266713	2.18658	0.227125	0.821816	0.899406	-6.33589
DTX3	2.35884	2.4353	2.073	2.38254	1.88307	2.00483	2.33041	1.83901	1.63331	1.50931	1.6549	1.81718	2.96059	3.09323	3.58938	2.84913	2.61345	2.09129	2.07562	2.20757	2.34849	2.32424	2.39648	2.76383	1.55958	1.75125	3.05714	2.14012	2.54232	0.0242412	2.2857	0.130488	0.897023	0.945291	-6.35318
DTX4	2.80822	2.28477	2.3448	3.00945	2.78029	2.61345	2.89431	3.11512	4.07084	1.04408	3.277	2.46751	2.07919	2.77425	4.26609	2.18999	3.05444	2.67439	2.96577	2.62778	2.58878	2.37797	3.05586	3.14868	1.61599	1.919	2.61674	2.89748	2.86678	0.156112	2.70445	0.683709	0.499233	0.675724	-6.12929
DUS4L	2.35811	2.60931	2.50016	2.42274	2.19774	2.29212	2.22516	2.30159	2.42045	2.03218	2.58602	2.66295	2.6125	2.95425	2.68358	3.07291	3.12649	2.62087	2.38333	2.85922	2.478	2.63233	2.63869	3.44997	2.12986	1.69654	2.4579	1.97	2.43391	0.0536201	2.51065	0.397668	0.693597	0.815217	-6.28268
DUSP1	3.87322	3.97372	3.38618	4.02947	4.39225	4.11332	3.6115	3.79915	4.38278	3.22834	3.22498	3.49988	3.20701	3.20601	3.60934	3.42788	3.39187	2.74776	3.70248	2.88849	4.62019	2.1869	2.82171	3.14424	3.47582	4.20751	2.97796	3.94057	3.50097	0.316836	3.53695	1.64122	0.110849	0.267698	-5.06912
DUSP10	2.2236	2.25422	2.14746	2.25147	2.90115	2.14573	2.52629	2.98262	2.1155	1.9844	1.90446	2.06031	3.28516	2.7447	3.31349	2.27902	2.24148	2.28857	2.84707	2.2439	2.28902	2.06673	2.13892	3.03256	1.75958	1.7907	3.4141	2.35145	2.28332	0.05751	2.40921	0.34306	0.733866	0.840366	-6.30286
DUSP11	2.66742	2.59301	2.53945	2.83942	2.48565	2.63477	2.56758	2.70672	2.95559	2.82896	2.80559	2.95817	2.62696	2.49188	2.48301	2.51609	2.53478	2.65764	2.68637	2.52662	2.5135	2.49915	2.51911	2.8476	2.64897	2.50238	2.49512	2.53166	2.56115	0.0784464	2.62842	1.25804	0.217761	0.408199	-5.58887
DUSP12	2.51911	2.47465	2.2799	2.5711	2.54039	2.2236	2.2774	2.74494	2.57546	2.78003	2.61281	2.28203	2.75736	2.16034	2.3198	2.26751	2.1129	2.30029	2.24872	2.34133	2.28726	2.31589	2.54954	2.01575	2.42414	2.7925	2.30504	2.69906	2.33602	0.0565088	2.41775	0.674644	0.504897	0.679539	-6.13537
DUSP13	3.008	3.07836	3.10049	3.09206	2.94594	3.29891	3.43323	2.69464	3.04912	3.03503	2.55905	2.47493	2.6559	2.75096	2.61586	2.17361	2.62809	3.49392	3.17418	3.66183	3.69218	3.72784	3.69311	2.63206	4.12705	3.96332	4.02696	4.1068	4.53306	-0.877544	3.2216	-6.0123	1.18e-06	0.000247533	5.4723
DUSP14	2.4562	2.72999	2.84582	2.95449	2.73897	2.95669	2.88438	1.70326	2.53546	2.1486	2.13052	2.56115	2.77398	3.10595	2.71953	2.58182	3.03432	2.8151	2.71432	2.70704	3.09292	3.0057	3.47218	2.86096	2.75533	2.85248	3.4284	3.38945	2.95367	-0.365075	2.78995	-2.95767	0.00588272	0.0406571	-2.51565
DUSP22	3.12444	3.28589	3.07495	3.04416	3.62913	3.25281	3.22739	2.9443	2.81602	2.68951	2.92147	3.32591	3.0123	3.13995	2.95131	3.09177	3.09986	3.29316	3.29203	3.46904	3.02828	3.09177	3.3097	3.87872	3.2685	3.38618	3.33203	2.98361	3.02058	-0.183516	3.17189	-2.07044	0.0468192	0.152513	-4.35384
DUSP26	3.58662	3.75598	3.53781	3.62463	3.48156	3.71637	3.77251	2.91297	3.45815	3.20701	3.71812	3.52402	3.33236	3.62186	3.14297	3.67041	3.55797	3.4006	3.14449	3.79237	3.71537	3.61932	3.38068	3.50393	3.36578	2.99193	3.98813	3.24868	3.83855	0.00798521	3.50383	0.0797566	0.936943	0.964537	-6.35852
DUSP3	4.2552	3.61932	3.79237	3.42233	2.98493	3.32634	3.73928	2.90535	3.13463	2.9754	3.10658	3.64237	3.31423	3.61224	3.49392	3.6526	3.78319	3.49544	3.33445	3.57218	3.73629	3.83619	3.48947	3.69388	3.60865	3.33806	3.59367	3.17012	3.72228	-0.0927355	3.49486	-0.818032	0.419576	0.608821	-6.0301
DUSP5	3.30217	3.13463	3.27304	2.27865	2.62362	3.06474	2.33486	3.03454	3.42092	2.70927	3.37771	2.03566	1.88417	2.41561	3.08261	3.17103	2.46605	2.34551	3.33374	2.05201	3.57896	2.61854	2.98096	2.67222	4.28371	2.99991	2.11682	2.59369	2.86774	-0.0697708	2.82942	-0.351497	0.727591	0.837037	-6.29993
DUSP7	2.3141	2.91683	2.69579	2.23562	2.5226	2.42976	2.86749	1.12602	2.45893	2.06836	1.68321	2.62609	2.2778	3.1454	2.47007	3.3295	3.02587	2.42126	2.57045	2.37603	2.42203	2.56857	3.07204	2.42045	2.94277	2.40494	2.86317	2.8626	2.63091	-0.147637	2.54306	-0.921571	0.363862	0.560809	-5.94207
DUSP8	2.17191	2.47653	2.26992	2.183	1.66524	2.07562	3.00098	1.56931	2.18903	2.20325	1.65355	2.3865	2.10056	2.55011	2.13112	1.99011	2.44751	2.08223	2.80822	2.33137	2.67991	2.84607	2.81868	2.56697	2.91382	2.80735	2.73718	3.30847	2.72375	-0.53842	2.40304	-4.37492	0.000127377	0.00423529	1.04695
DVL1	2.7775	3.32052	2.96488	2.48661	2.50631	2.89634	3.0123	2.16498	2.4729	2.50906	2.13289	2.9171	2.88052	3.19428	2.64182	2.84349	2.99772	3.29155	3.33236	3.42315	3.22471	3.2198	3.24214	3.04212	3.63003	2.8114	3.50772	3.25281	3.84663	-0.570513	2.98426	-4.98001	2.27e-05	0.00166157	2.67542
DVL2	2.98338	2.83296	2.61734	2.74392	2.6624	2.88287	2.98493	2.94325	2.77719	2.77073	2.48795	2.99485	2.87615	2.8292	2.71775	2.69112	2.80265	2.68516	2.97484	2.74058	2.81818	2.8882	2.87519	2.83503	2.75991	2.61379	3.03682	2.64729	3.05059	-0.0272099	2.81118	-0.435726	0.666052	0.797011	-6.26688
DVL3	3.65193	3.45343	3.46227	3.69486	3.31038	3.86917	3.42092	2.42447	3.37847	2.75904	2.79325	3.40567	3.7913	3.9654	3.74477	4.12491	3.4587	3.53441	3.42644	3.58421	3.63295	3.58015	3.91516	3.0653	3.09227	3.41368	3.27446	3.62045	3.42051	-0.0098638	3.45755	-0.0717734	0.943243	0.968832	-6.35913
DYNC1H1	3.60934	3.61065	3.63433	3.53668	3.64652	3.66109	3.73417	3.41189	3.39658	3.55079	3.2974	3.37356	3.51926	3.81072	3.40875	3.52532	3.76716	3.6399	3.67884	3.59091	3.53668	3.80618	3.36578	3.65954	3.54285	3.2756	3.2814	3.41268	3.56436	0.0289234	3.54651	0.438837	0.66382	0.795563	-6.26553
DYNC1I1	3.1688	2.64559	3.70079	3.15432	3.59905	3.14596	3.44134	1.61011	3.07867	2.52452	2.62389	2.73155	3.37157	4.22906	3.45815	2.96686	3.02002	3.33516	2.65733	3.09505	3.04721	3.66412	3.62045	3.16537	3.17183	2.61105	3.61355	3.00912	4.05058	-0.166916	3.15555	-0.891924	0.379298	0.576599	-5.96829
DYNC1I2	3.59289	3.58662	3.58467	3.64156	3.7288	3.69829	3.58732	3.5534	3.47303	3.54615	3.41368	3.70331	3.43172	3.3835	3.22703	3.2458	3.49168	3.76716	3.77672	3.68255	3.6364	3.49111	3.4284	3.64449	3.64884	3.5521	3.54153	3.26999	3.56697	-0.0609452	3.54813	-0.961629	0.34367	0.541114	-5.90535
DYNC1LI2	3.2117	3.23671	3.35419	3.8352	3.93459	3.66506	3.31543	3.38255	3.70331	3.75414	3.79915	3.46227	3.34566	3.15734	3.07706	3.06387	3.5467	3.30518	3.33641	3.1784	2.89115	3.36799	2.62696	3.29246	3.0824	2.88136	3.2867	2.96749	3.44907	0.32267	3.32795	3.19644	0.00319199	0.0283023	-1.95665
DYNC2LI1	1.43616	1.75429	1.34383	1.37954	1.87175	1.32543	1.58519	1.44282	2.18946	1.95847	1.63109	1.72085	1.26611	1.54678	1.61599	1.56931	1.29107	1.06527	1.04408	0.983302	1.32983	1.11454	1.81845	2.21451	1.6609	2.14799	2.17944	2.0885	1.97618	-0.0512399	1.60521	-0.375854	0.709582	0.824288	-6.2911
DYNLL1	3.12147	3.54022	3.66603	3.65954	3.83748	3.39275	3.40875	3.6808	3.48156	3.56308	3.74048	2.98721	3.26583	3.07373	3.18773	3.40951	3.48493	3.26042	3.46785	2.778	2.9318	2.87615	3.02323	2.66161	3.07903	3.02909	3.34324	2.77241	3.28325	0.399066	3.27611	4.18444	0.000217891	0.00560453	0.542012
DYNLRB1	3.57218	3.53781	3.57169	3.60657	3.79589	3.72784	3.51341	2.84129	2.4783	3.0838	2.86902	3.08857	3.7499	3.96063	3.7913	3.67977	4.18938	3.55405	3.63907	3.76822	3.46785	3.54365	3.74263	3.82251	3.2089	3.37248	3.6497	3.39048	3.54783	-0.0849866	3.50913	-0.63596	0.529465	0.69739	-6.16042
DYNLT1	3.98163	4.092	3.59008	3.72228	3.89273	3.82783	3.61355	4.1587	4.11812	3.69046	3.315	3.48893	3.96884	3.57169	3.82899	3.31737	3.1054	3.59289	3.55146	3.45974	3.26481	3.54728	3.07086	3.17817	3.24701	3.25045	3.18738	4.10258	3.39048	0.318971	3.59058	2.90451	0.00672276	0.0440825	-2.63694
DYNLT3	2.9898	3.00262	2.90307	3.0874	3.14957	3.00147	2.80236	2.15032	2.34279	2.13052	3.06996	2.11624	2.78029	3.0855	2.70601	2.65847	2.97681	2.75817	2.37363	2.65456	2.86749	3.02291	3.23817	2.55883	3.34048	3.315	2.64057	3.73744	3.12094	-0.207064	2.84763	-1.50964	0.14125	0.311333	-5.26099
DYRK1A	3.5015	3.52762	3.22081	3.1454	3.52643	3.33887	3.0361	3.33286	3.18608	3.50046	3.25742	3.36838	2.48988	2.7095	2.50437	3.01745	2.69821	3.24321	3.25588	3.14795	2.957	3.23316	2.81202	3.58202	3.37979	3.4973	3.26999	3.68689	3.33087	-0.144106	3.19853	-1.24777	0.221448	0.411713	-5.60112
DYRK2	2.84182	2.98947	2.56402	2.76914	2.69991	2.49943	2.84505	2.44953	2.81171	2.40896	2.42976	3.36295	2.43885	2.852	2.28609	2.69302	2.72202	2.48957	2.53757	2.51164	2.44154	2.56207	2.71479	2.97247	2.63609	2.2926	2.69932	3.0123	2.5365	0.0688972	2.65759	0.737543	0.466333	0.649863	-6.09159
DYRK4	3.21055	2.93327	2.87074	3.26583	3.10317	3.03889	2.88028	2.65033	2.66052	2.33313	2.93942	2.90307	2.94301	3.20669	3.05561	3.23535	3.44265	3.07263	2.83165	2.87591	3.02505	2.8067	3.19662	3.22915	2.71456	2.7969	3.29527	2.57485	2.77976	0.0474831	2.96109	0.493424	0.625187	0.768764	-6.24021
DYSF	3.41874	3.51926	3.43452	3.3572	3.05809	3.60195	3.50458	3.16199	3.33286	2.95158	2.72917	3.42051	3.46434	3.48217	3.6143	2.96911	3.31271	3.74381	3.44747	3.69559	3.64884	3.55079	3.64507	3.66334	3.27267	3.14922	3.70164	3.17876	3.79915	-0.227651	3.40791	-2.44756	0.020239	0.0895805	-3.62482
DZIP1	2.75488	2.59647	2.57603	2.93075	2.86396	2.95367	2.6409	2.86796	3.38068	3.13896	2.82065	3.03503	3.07706	2.46315	2.64779	2.81818	2.78416	2.50704	2.49613	2.86602	2.38297	2.48762	2.29707	2.85985	2.55465	2.51724	2.02179	2.59301	2.49147	0.337894	2.70432	3.80507	0.000625295	0.0109991	-0.445594
E2F8	1.61599	1.52372	1.54253	1.58932	1.38753	1.70141	1.4186	1.84134	1.29657	0.65695	0.710733	2.69279	0.266263	1.10201	0.837933	1.4116	0.94637	1.80992	1.48925	1.61599	1.53946	2.10448	2.06213	2.57784	3.397	2.37485	3.18503	3.97569	3.51061	-1.14421	1.79944	-4.6432	5.94e-05	0.00291249	1.76542
EAPP	2.37959	2.55465	2.37649	2.63927	2.85175	2.3289	2.29748	2.97657	2.75045	3.00147	2.96356	2.97096	2.05555	2.28564	1.91982	2.0885	2.38184	2.49322	2.41627	2.26139	2.31896	2.16695	2.31589	2.30551	2.52289	2.7362	2.50437	2.31146	2.53852	0.111333	2.4729	1.02858	0.311627	0.511223	-5.84072
EBAG9	2.70819	3.2985	3.30152	2.97512	3.14146	3.14571	2.79429	2.51308	2.89038	2.91052	3.10288	3.23005	2.93408	3.24668	3.05136	3.21788	3.16723	3.0469	3.09177	3.20631	2.852	2.96658	2.9425	3.1185	2.61082	2.90734	2.89281	2.92271	3.10658	0.0649269	3.01013	0.819974	0.418485	0.607561	-6.02854
EBP	2.19204	2.69388	2.2321	2.51308	2.32549	2.42874	2.37441	1.74526	1.1959	1.45315	2.34849	1.76681	2.46483	3.17817	2.59647	2.8067	2.81085	2.63062	2.56055	3.25118	2.48339	2.36311	3.10346	2.7917	2.30159	2.91052	3.38568	3.01443	2.88236	-0.504996	2.51052	-3.09582	0.00413934	0.0330965	-2.19492
ECD	2.49455	2.37884	2.7753	2.8123	2.72062	2.69089	2.59506	2.75264	2.3665	2.54834	2.53618	2.96936	2.43078	2.8126	2.57517	2.70278	2.8238	2.57808	2.53036	2.73395	2.5711	2.80532	2.82348	2.88186	2.85544	2.82636	2.49878	2.31048	2.56304	-0.0186344	2.65393	-0.257729	0.798317	0.884429	-6.32847
ECE1	3.45295	3.12687	3.23577	3.3448	3.29357	3.51676	3.34239	3.01843	3.08107	3.60262	3.00461	2.62421	3.51676	3.51926	3.09357	3.02291	3.2532	3.22629	3.25156	3.8352	3.4006	3.20258	3.11422	3.29591	3.22498	3.56511	3.67446	3.3233	2.99965	-0.1046	3.2815	-1.10341	0.278331	0.476079	-5.76369
ECH1	3.95577	4.75658	3.69046	4.14249	3.84453	3.99185	4.29577	3.16051	3.44579	3.0083	3.96332	4.13815	3.92888	4.34254	4.14474	4.05739	4.26064	4.44007	4.17895	4.43545	3.8252	4.30958	4.40827	3.45658	3.24089	4.02259	3.84792	4.22906	4.69158	-0.141824	4.00737	-0.907666	0.37105	0.568512	-5.95447
ECHDC1	2.82009	3.01279	3.1176	2.94375	2.69607	2.72006	2.8849	2.99012	3.12094	2.65243	2.7095	3.00461	2.56055	2.92963	2.85849	2.75682	2.94455	2.86375	2.64219	2.73791	2.98467	2.32934	2.80128	2.76164	2.55883	2.75208	2.768	2.83478	2.67991	0.139855	2.80818	2.03009	0.0509948	0.162007	-4.42656
ECHDC2	3.08684	3.58542	2.92941	3.72784	3.53372	3.47804	3.40394	3.33968	3.75791	3.17103	3.24397	3.86379	3.1133	2.95342	3.18284	3.00968	2.92984	3.46182	3.74647	3.38255	3.66603	3.1784	2.85684	3.43913	3.05136	3.60527	3.5051	3.48015	3.6226	-0.103918	3.35539	-0.960649	0.344155	0.541474	-5.90627
ECHDC3	3.60805	4.14905	3.22834	3.48015	3.10686	3.35045	3.60322	2.95791	3.18338	3.22498	3.23177	3.82434	3.57791	4.10258	3.80374	3.3589	3.47486	3.71812	3.04275	3.42933	3.47303	3.37248	3.35639	2.95184	2.72704	3.10658	3.20601	3.23957	3.33481	0.239771	3.38705	2.08445	0.0454415	0.149363	-4.32834
ECHS1	3.82783	4.02947	3.91516	3.77351	4.06503	3.98303	4.17307	3.83228	3.65857	3.78922	3.56436	3.94338	3.61704	3.8252	3.7641	3.83748	3.86246	3.91799	4.1068	3.89694	4.12705	4.05739	3.71475	3.98452	3.84911	3.53503	3.69637	3.82434	3.89841	-0.0334016	3.86448	-0.481363	0.633636	0.774886	-6.24606
ECI1	2.89463	3.46693	2.78785	3.16761	3.01412	3.0286	3.31385	2.32064	2.34015	2.34249	2.64149	3.38306	2.61825	3.42447	2.95101	2.95903	3.29927	2.89378	3.22524	3.45596	3.12649	3.15301	3.27231	3.40875	3.01919	3.39998	3.16441	3.2855	3.40828	-0.295971	3.06091	-2.52731	0.0168033	0.0788025	-3.46005
ECM2	3.29285	3.11973	3.19531	4.26345	4.18185	3.66944	2.99193	3.7611	4.58581	4.2552	4.21977	3.26881	4.26609	2.19102	3.43225	3.4312	3.58807	2.57926	3.0511	2.63667	3.09986	2.30639	2.95507	2.95025	2.05706	1.38329	2.8863	2.28816	2.98858	1.03173	3.20331	5.01632	2.04e-05	0.00166157	2.77386
ECPAS	2.92512	2.94783	3.01979	2.77073	3.02621	2.89517	2.91535	2.51129	2.3436	2.67168	2.63419	2.71853	2.9672	3.20958	3.07291	3.23997	3.02933	2.99699	2.99828	3.07792	2.72601	3.06967	2.85297	3.28754	3.00379	2.64446	2.90977	2.94301	3.24668	-0.103378	2.91916	-1.20401	0.23769	0.430606	-5.65233
ECSIT	2.95641	2.94375	2.79123	2.44234	2.51881	2.53971	2.96408	1.83269	1.86094	1.78514	2.21661	3.09929	2.3873	3.10136	2.78471	3.00596	2.92616	2.84477	2.778	3.03151	3.14833	3.01718	3.29285	3.15894	2.94758	2.87864	3.20482	3.20923	3.35338	-0.474663	2.79385	-3.53964	0.00128712	0.0159515	-1.11777
ECT2	1.70532	1.71637	1.5807	1.37019	1.6609	1.54451	1.52372	1.85992	1.45021	1.52071	1.15273	2.28609	1.95083	1.61804	1.48925	1.94348	1.35654	2.05555	1.8063	1.56403	1.47945	2.0587	2.42447	2.10968	2.68612	1.9426	1.95759	2.76585	2.46233	-0.478241	1.82904	-3.89593	0.000486819	0.0092819	-0.211651
EDAR	2.7902	2.62638	2.48624	2.77558	2.64474	2.64838	2.5809	2.50376	2.23316	2.19774	2.50869	2.52289	2.88515	3.20184	3.20445	3.22267	3.20415	2.81085	2.76526	2.85711	2.65907	2.67094	2.94542	2.50309	2.36144	2.60695	2.94542	2.54395	2.35012	0.051518	2.6985	0.482426	0.632889	0.774456	-6.24555
EDEM3	1.9207	2.08994	1.9884	1.54451	1.67353	1.75125	1.6609	2.43497	2.2774	1.86655	2.3873	2.34968	1.51524	2.00483	1.58932	2.12801	1.74907	1.9153	1.92674	1.89224	1.55228	1.97234	1.68771	2.26557	2.58351	2.04574	1.777	2.13526	2.11682	-0.0520577	1.95869	-0.477051	0.636668	0.776679	-6.24811
EDIL3	2.14636	1.76217	1.90831	2.05555	1.87623	1.97	2.20578	2.80344	2.89574	3.47764	2.89798	1.15273	2.44787	3.73629	3.4973	1.18037	1.29657	1.79319	1.98692	2.10448	2.12259	2.19774	0.924913	4.22356	1.38753	1.71781	2.39946	1.18753	2.35669	0.278837	2.19699	0.966465	0.341284	0.539114	-5.90082
EDNRA	3.57541	3.09416	2.86902	2.30288	2.80396	2.22649	2.40459	1.35171	2.61379	2.81536	2.8272	3.16199	2.70819	2.81868	2.97293	2.01527	2.96749	1.93788	2.05635	1.87399	2.57397	3.19971	2.38184	3.25933	1.67828	2.63637	3.315	2.02179	3.27446	0.16077	2.61166	0.810058	0.424076	0.613391	-6.03646
EDNRB	2.53166	2.46751	3.05746	2.27486	2.768	2.277	2.83968	1.77163	1.6425	2.94594	3.37031	1.39513	2.96162	3.01573	2.99772	3.62328	2.53789	2.78614	2.73543	3.55146	2.89772	2.19267	2.834	2.5863	3.56233	2.76556	2.29127	3.13072	2.65054	-0.215663	2.70559	-1.12209	0.270431	0.467997	-5.74369
EDRF1	2.83942	2.9443	3.0684	2.84675	3.21145	3.04053	2.89281	3.10967	3.07263	2.93327	2.99036	3.01125	3.05491	2.94024	2.95232	3.03014	3.17075	2.94858	2.82779	2.84216	2.86678	2.86602	2.64808	3.57472	2.63006	2.44057	2.99864	2.4231	2.7065	0.192006	2.92697	2.32932	0.0265248	0.106234	-3.86258
EEA1	2.27486	1.98134	1.96576	1.92872	1.78107	1.7907	1.85992	1.87623	1.93148	1.84657	2.18054	2.29489	1.95439	2.09551	1.81718	1.83701	2.22516	1.87273	1.88543	1.95984	2.06402	2.12634	2.28203	2.20478	2.30247	2.17191	2.17902	2.43147	2.40792	-0.178427	2.05273	-2.45016	0.0201176	0.089188	-3.61951
EED	1.92967	2.72786	2.55072	2.26847	2.73469	2.22268	2.36437	2.96356	2.49425	2.52904	2.71379	2.41818	2.20917	2.20375	2.07365	2.21661	2.33565	2.40146	2.14068	2.05952	2.4606	2.09504	2.09812	2.14288	2.94622	2.29748	2.39064	2.56175	2.76556	0.0458551	2.39021	0.440223	0.662827	0.795071	-6.26492
EEF1A1	3.63295	3.75698	3.78808	3.92338	4.03691	3.88654	3.54547	4.29577	4.24648	4.29577	4.62906	3.44315	3.8911	3.29556	3.45248	3.83977	3.09416	3.67041	3.41925	3.3624	3.71812	3.49544	3.18106	2.55434	3.1825	3.28102	3.9588	3.06907	2.81928	0.517375	3.6126	3.59307	0.00111442	0.0150175	-0.983956
EEF1A2	4.35339	4.18938	4.0329	3.35673	3.47535	4.00661	4.32998	2.3559	2.06151	2.46277	2.7434	3.29246	4.02082	5.09226	4.37551	4.50264	4.81824	3.87872	3.87989	3.90888	4.1869	4.14249	4.98887	4.63567	3.43408	3.32713	4.02947	3.40951	4.00342	-0.251898	3.83775	-0.935908	0.356547	0.55313	-5.9291
EEF1AKMT3	2.67439	2.36559	2.39387	3.01359	2.61644	2.75964	2.65706	3.1926	3.37771	3.2974	3.37198	2.57808	3.29203	1.74091	2.43465	1.9715	2.31938	2.80293	2.79924	2.70103	2.3559	2.62255	2.5185	2.92198	2.77558	2.97742	2.30675	2.47681	2.29843	0.0794644	2.67634	0.537063	0.595055	0.744828	-6.21788
EEF1AKNMT	2.53971	2.70391	2.70819	2.52289	2.72427	2.74368	2.78533	2.76634	2.72249	3.04333	2.71325	3.13295	2.74225	2.69821	2.67008	2.98318	2.44484	2.91535	2.87492	2.91262	2.80764	2.95131	2.78913	2.76585	2.93911	2.58968	2.87567	2.65141	2.62556	-0.0643699	2.77045	-0.963104	0.342941	0.540479	-5.90397
EEF1D	3.47535	3.43225	3.29357	3.31705	3.34282	3.32251	3.4837	3.10829	2.71054	3.23957	2.93544	2.96749	3.51341	3.61932	3.54439	3.6005	3.42545	3.39141	3.55675	3.37198	3.39367	3.3	3.34906	3.342	3.24807	3.19531	3.41147	3.02744	3.25742	-0.00675417	3.31642	-0.0809064	0.936036	0.964033	-6.35843
EEF1E1	2.16159	2.44917	2.29935	2.41956	2.78211	2.42166	2.21498	2.00402	1.86962	2.06898	2.36186	2.58035	2.17091	2.62556	2.23614	2.02106	2.6602	2.41058	1.86962	2.51308	2.11164	2.41001	2.85711	2.28857	2.57281	2.72856	2.51576	2.55072	2.63903	-0.141088	2.37292	-1.42235	0.164899	0.342725	-5.38067
EEF2	4.63567	4.55257	4.42148	4.39225	4.12705	4.63567	4.42148	3.72613	3.66265	3.68404	3.83977	3.92164	4.07084	4.92512	4.39571	4.03893	3.61224	4.29291	4.42678	4.03498	4.00017	4.37551	4.2437	4.30238	4.00342	4.04093	4.39571	4.00661	4.41203	-0.0310706	4.19305	-0.255201	0.800251	0.884429	-6.32911
EFCAB11	2.07097	2.00075	2.05486	2.35624	2.30961	2.16222	2.06721	2.19678	2.40964	1.94991	1.89434	2.14746	2.25893	2.33602	2.54954	2.43113	2.58573	2.21939	2.07162	2.29489	2.3421	2.12567	2.5109	2.48493	2.13468	2.41412	2.42729	2.09687	2.19489	-0.0540145	2.24478	-0.713586	0.480816	0.661547	-6.10871
EFCAB14	3.64507	3.18579	3.45498	3.34398	3.17317	3.14795	3.42051	3.47623	3.31159	3.33041	3.04237	3.05227	3.50271	3.19322	3.33481	3.41319	3.4182	3.34766	3.29316	3.12002	3.55736	3.40212	3.18608	3.36988	3.08075	3.04154	3.10856	3.04075	3.18428	0.0926998	3.28202	1.33707	0.190921	0.374628	-5.49156
EFEMP1	3.61224	3.30666	4.13102	4.54079	4.8958	4.60506	3.3996	5.09226	4.61256	4.01759	5.56279	2.58914	4.60506	2.88261	3.24604	2.47363	3.47804	4.02082	3.77454	2.9121	3.13266	3.01551	4.14031	2.16391	3.92627	3.86379	3.34239	3.84328	1.88543	0.609085	3.69213	2.0377	0.0501828	0.160215	-4.41292
EFEMP2	3.31349	3.49689	3.22307	3.44579	3.65125	3.34566	3.3835	3.30188	3.1923	3.2685	3.25705	3.15467	3.30337	3.13404	3.18738	3.36336	3.42276	3.22557	3.31463	3.21055	3.15559	3.15525	3.25045	2.84988	2.99721	3.51121	3.54966	2.92984	3.02232	0.139278	3.26266	1.96604	0.0582957	0.178188	-4.53975
EFHD1	3.21859	3.79033	3.35814	3.94057	3.30114	3.67545	3.63498	3.00262	3.44997	3.76822	2.77294	3.23276	4.29884	3.40778	3.43076	3.50333	3.8252	2.86973	3.14424	3.71718	3.46136	3.50097	3.54285	3.04028	2.17142	3.54153	3.26042	3.47218	3.12147	0.269597	3.39501	1.90457	0.0661418	0.193747	-4.64574
EFHD2	2.76526	2.72856	2.59219	2.60837	2.52535	2.58968	2.42166	3.34766	2.58439	2.48923	2.67552	2.64182	2.78785	2.77697	2.87864	2.77774	2.6582	2.67195	2.75991	2.32341	2.68923	2.67747	3.04544	2.3289	2.47867	2.78714	2.16092	2.48195	2.27358	0.140458	2.63889	1.58292	0.12358	0.285664	-5.15581
EFNA1	2.9499	3.0381	2.4853	2.93126	2.77958	2.99485	2.89798	1.49528	1.70699	2.18346	2.02642	2.16795	3.01871	3.07836	3.2198	3.26481	2.59136	2.43078	2.72999	2.53382	2.49548	2.50016	3.46182	3.3589	3.33167	2.96773	2.25794	2.76324	2.99699	-0.181979	2.71237	-1.03723	0.307646	0.507746	-5.83208
EFNA5	3.04154	2.99036	2.72969	2.99699	2.86176	2.69679	2.97572	2.52763	2.93327	2.81788	2.90172	3.00912	2.8156	2.50167	2.93891	2.50804	2.90438	2.85792	2.62869	2.92963	2.8465	2.51724	2.32795	2.50736	3.05172	3.02768	2.99941	2.91922	3.28482	0.00757009	2.82928	0.0868266	0.931367	0.963343	-6.35793
EFNB2	3.12896	2.94858	2.93433	3.09227	2.71241	3.51739	3.17817	2.02179	2.72627	2.42874	2.81761	3.15951	2.53917	2.61345	3.22739	2.82094	2.77774	2.60192	2.99772	2.46751	2.96408	3.02346	3.00121	3.0757	3.77899	3.5067	1.88744	4.02082	2.91382	-0.158494	2.92704	-0.963978	0.34251	0.539955	-5.90316
EFR3A	3.49168	3.66023	3.60527	3.4006	3.46136	3.53668	3.32136	3.41467	3.57218	3.53503	3.6526	3.31929	3.41643	3.15178	3.07903	3.29316	3.2685	3.73744	3.07423	3.08857	3.36117	3.52349	3.06139	2.90734	3.08795	2.77209	3.54285	3.55608	3.7652	0.132528	3.3675	1.39462	0.173035	0.352925	-5.41739
EGF	2.31146	2.277	2.4366	2.30426	2.65189	2.4283	2.9672	1.97	1.98203	2.17837	2.10968	2.24792	2.54295	2.68663	2.43922	2.25272	2.82862	2.91762	2.61163	3.05198	2.57658	2.78362	2.66802	2.92888	3.86659	2.03663	3.34859	2.43044	3.83228	-0.531963	2.60923	-3.58989	0.00112402	0.0150596	-0.991926
EGFL6	1.99689	1.8291	1.73647	1.9102	1.94348	1.9207	1.75802	1.15273	2.5809	3.24127	1.35171	2.7323	2.09456	2.15734	2.01178	1.91113	1.92238	2.04684	1.83053	1.86094	1.81951	1.93148	2.10319	2.22222	2.7369	1.83601	2.07919	2.28247	1.58714	-0.013275	2.02026	-0.0873515	0.930953	0.963186	-6.35789
EGFR	2.75294	2.33041	2.38614	2.68841	2.4667	2.52695	2.61734	2.42126	2.97375	3.26402	2.75991	2.47588	2.69523	2.2778	2.45225	2.44648	2.62869	2.66596	2.62219	2.68489	2.8158	2.50804	1.90549	2.82862	2.54128	2.93382	2.83478	2.92842	2.38689	-0.0401229	2.6145	-0.399776	0.69206	0.814373	-6.28185
EGLN1	3.539	2.85849	2.88902	2.76585	2.58182	3.17183	2.78913	2.2558	2.06402	2.22703	2.55763	2.71642	2.42907	2.88681	2.76962	2.60777	3.13434	3.32555	2.66619	3.08133	3.53095	3.19732	3.06748	3.86776	3.66944	3.04576	3.3794	3.49596	3.78212	-0.622223	2.97769	-4.70623	4.97e-05	0.00255479	1.93517
EGLN3	4.16806	3.74738	3.30934	2.87101	2.75514	3.45714	3.31113	2.65789	3.13042	3.06996	3.43784	2.86945	2.39872	2.92435	2.12634	2.3088	3.22803	2.49878	3.0115	2.86926	2.69436	3.06811	3.11479	2.13652	3.55029	4.32259	2.55331	4.39225	3.67446	-0.111833	3.09163	-0.518544	0.607757	0.754418	-6.22759
EGR1	3.51394	3.47218	3.5015	4.37551	3.12235	3.93075	2.96517	3.35546	4.98887	3.48156	2.88777	4.04093	2.28816	3.42877	2.24525	2.9499	2.47076	2.5365	3.76295	2.18903	3.44907	3.04602	2.87998	3.04576	4.8549	4.68458	2.14424	4.15142	1.32983	0.181191	3.27907	0.583028	0.564088	0.723417	-6.19235
EGR3	3.27231	2.93761	2.8269	2.95874	2.45445	2.86465	2.5097	1.32983	4.59827	1.80125	1.22521	1.98768	1.60403	1.83053	2.80735	4.07517	1.68161	2.62116	3.34766	2.56365	2.67148	2.76585	4.62906	1.83169	4.87053	4.97369	2.7098	4.72061	1.29657	-0.734541	2.81955	-1.93635	0.0619782	0.186105	-4.59127
EHBP1	1.92674	2.62725	2.7397	2.69089	2.90734	2.62725	2.80505	2.88083	2.94455	2.53885	2.47867	2.47328	2.83088	2.75533	2.7609	2.78165	2.81842	3.01919	3.16233	2.73945	2.67525	2.6057	2.29522	2.99561	2.65733	2.54889	3.2238	2.57546	2.84864	-0.0972824	2.72188	-0.999643	0.325215	0.524657	-5.86916
EHD1	2.85225	2.87074	2.50111	2.70601	2.61556	2.59774	2.83061	3.07263	2.44751	2.30757	2.31146	2.48038	2.7065	2.60906	2.7824	3.08629	2.85175	2.71081	2.73363	2.82811	2.63819	2.79325	3.2707	2.48129	2.74058	3.0584	2.41166	3.04967	2.55297	-0.0883463	2.72065	-0.954805	0.347056	0.544527	-5.91171
EHD3	3.83114	3.29665	3.64652	3.35288	3.77562	3.53715	3.52349	2.58764	3.44357	3.56436	3.65501	3.55405	3.61294	3.51394	3.59763	4.73762	3.32413	3.2287	2.85464	3.15587	3.38027	3.88093	3.48601	3.21113	2.97214	2.24525	3.24466	2.67465	3.54615	0.40532	3.3943	2.67733	0.0117529	0.0622822	-3.14099
EHD4	3.33679	3.44315	3.38518	3.29927	3.00461	3.47764	2.86818	3.12147	2.23614	2.26506	2.26751	3.74477	2.888	3.50772	3.33374	3.96063	3.44019	3.78808	3.74807	3.19364	3.72693	4.10868	4.61256	3.81298	3.57408	3.46536	2.97742	3.26303	3.3794	-0.48575	3.35277	-2.80317	0.00864636	0.0516385	-2.86475
[truncated: 4,084 more rows]

## Sheet: Sheet2
DCM	GSM82386
DCM	GSM82387
DCM	GSM82388
DCM	GSM82389
DCM	GSM82390
DCM	GSM82391
DCM	GSM82392
DCM	GSM2251530
DCM	GSM2251531
DCM	GSM2251532
[truncated: 19 more rows]
