# Supplementary material for: Identification of key immune-related genes in dilated cardiomyopathy using bioinformatics analysis
Source: Sci Rep. 2023 Feb 1;13:1820. doi: 10.1038/s41598-022-26277-w (PMC9892583; doi:10.1038/s41598-022-26277-w)
Supplement: Supplementary file 2 — Supplementary Information 2. [file 41598_2022_26277_MOESM2_ESM.xlsx]

## Sheet: Total DEGs
	logFC	AveExpr	t	P.Value	adj.P.Val	B
C1ORF105	-1.84744	3.29393	-7.78358	8.73e-09	4.76e-05	10.0886
PHLDA1	0.972022	3.10087	7.28052	3.4e-08	5.2e-05	8.81427
ASPN	1.72353	3.78174	7.27103	3.49e-08	5.2e-05	8.7899
TSC22D3	1.4886	3.46648	7.23916	3.81e-08	5.2e-05	8.70805
TRMT5	0.61421	3.22228	7.07247	6.03e-08	6.35e-05	8.27777
MOG	-1.05717	2.34472	-7.01875	6.99e-08	6.35e-05	8.13839
ATP10D	1.04253	2.86294	6.88692	1.01e-07	7.74e-05	7.79492
CUTC	-0.530861	3.16071	-6.84364	1.14e-07	7.74e-05	7.68173
CCDC69	-0.840551	2.86561	-6.77948	1.36e-07	8.23e-05	7.51358
LRRC17	1.38235	2.6072	6.40028	3.93e-07	0.000204065	6.51108
PTP4A2	-0.475365	3.29479	-6.35697	4.44e-07	0.000204065	6.39572
RHOBTB1	0.717593	2.74604	6.31381	5.02e-07	0.000204065	6.2806
GTF3A	-0.620476	3.76567	-6.29784	5.25e-07	0.000204065	6.23794
OMD	1.44994	2.61911	6.28956	5.37e-07	0.000204065	6.21585
XPO1	0.514547	3.18982	6.26049	5.83e-07	0.000204065	6.13814
ODC1	0.884733	2.62459	6.25135	5.99e-07	0.000204065	6.1137
SSPN	0.676758	3.34617	6.17158	7.51e-07	0.000238797	5.90013
COL1A2	1.36413	3.64423	6.15433	7.88e-07	0.000238797	5.85389
RASGRP2	-0.546534	2.04379	-6.13093	8.42e-07	0.000241763	5.79113
SEPTIN6	0.801066	2.53856	6.09468	9.34e-07	0.000245778	5.69381
MID1IP1	-1.21983	3.46501	-6.08232	9.67e-07	0.000245778	5.6606
NOTCH2	0.676314	3.26525	6.07353	9.92e-07	0.000245778	5.63697
STEAP3	-0.689697	2.56833	-6.04779	1.07e-06	0.000247533	5.56779
PPM1G	-0.363811	2.67533	-6.01635	1.17e-06	0.000247533	5.48321
HMGN2	0.811536	3.47982	6.013	1.18e-06	0.000247533	5.4742
DUSP13	-0.877544	3.2216	-6.0123	1.18e-06	0.000247533	5.4723
KLHL41	-1.29104	4.42321	-5.92374	1.52e-06	0.000306762	5.23373
KAT2B	-0.491916	2.94881	-5.90401	1.61e-06	0.000312926	5.18052
AMD1	-0.718469	2.89593	-5.85076	1.87e-06	0.000334461	5.03677
COL3A1	1.44046	3.97292	5.84861	1.88e-06	0.000334461	5.03095
FOXO3	0.584198	3.17196	5.83593	1.95e-06	0.000334461	4.99671
IMPA2	-0.807359	2.52669	-5.83391	1.96e-06	0.000334461	4.99124
IDH2	-0.783297	3.59144	-5.80469	2.13e-06	0.000352555	4.91229
AP3M2	0.576194	2.83338	5.76738	2.37e-06	0.000380689	4.8114
PTDSS1	-0.860048	3.47693	-5.73346	2.62e-06	0.000407469	4.71965
MEAF6	0.409994	2.97544	5.64687	3.35e-06	0.000507545	4.48517
EXT1	0.628502	2.81205	5.62088	3.61e-06	0.000531987	4.41473
PIK3IP1	1.2407	3.01346	5.59917	3.84e-06	0.000541331	4.3559
COL5A1	0.7163	2.82405	5.59642	3.87e-06	0.000541331	4.34844
SFRP4	1.93566	2.96173	5.48282	5.36e-06	0.00073091	4.04029
TMEM11	-0.449278	2.89561	-5.46427	5.65e-06	0.00073091	3.98994
HTRA1	0.685845	3.43397	5.46009	5.72e-06	0.00073091	3.97859
BAG1	-0.617187	3.21091	-5.45761	5.76e-06	0.00073091	3.97186
DELE1	0.455534	3.12097	5.4489	5.91e-06	0.000732376	3.94821
ELP1	0.43771	2.74736	5.43828	6.09e-06	0.000738249	3.91938
MICAL2	0.415767	3.13659	5.4187	6.44e-06	0.000748879	3.86625
KIDINS220	0.452404	3.04751	5.41156	6.58e-06	0.000748879	3.84686
ESRRA	-0.674685	2.71555	-5.40434	6.72e-06	0.000748879	3.82724
RASL11B	1.40119	3.13055	5.40361	6.73e-06	0.000748879	3.82526
ILRUN	-0.520738	2.93584	-5.37877	7.23e-06	0.000781045	3.75781
NPPB	3.42796	4.14613	5.37487	7.31e-06	0.000781045	3.74721
NAP1L3	1.75589	2.71771	5.36824	7.45e-06	0.000781045	3.72922
PPP1R1A	-0.866246	3.29928	-5.35471	7.74e-06	0.000796645	3.69248
TCEAL1	-0.344654	2.99383	-5.34388	7.99e-06	0.000806567	3.66308
MRPL48	-0.454204	2.82699	-5.32116	8.53e-06	0.000845252	3.60138
NR2F6	-0.511424	3.06572	-5.28316	9.51e-06	0.000925823	3.49817
KCTD9	-0.559554	2.86925	-5.27183	9.82e-06	0.000939644	3.4674
LOX	0.879525	2.15102	5.24229	1.07e-05	0.00100514	3.38718
CLGN	-0.673218	3.13235	-5.18628	1.26e-05	0.00115782	3.23508
FCN3	-1.2416	3.09532	-5.1812	1.27e-05	0.00115782	3.2213
BNIP3L	0.447189	3.15462	5.16425	1.34e-05	0.00119561	3.17528
SEPTIN11	0.654726	2.82525	5.15557	1.37e-05	0.00119754	3.1517
GTPBP6	-0.740619	2.71324	-5.15245	1.38e-05	0.00119754	3.14323
RAD1	-0.504514	2.8739	-5.14585	1.41e-05	0.00120137	3.12531
EMC3	-0.530673	2.54489	-5.11957	1.52e-05	0.00127553	3.05398
RARRES1	-2.01118	2.74775	-5.05342	1.84e-05	0.0015187	2.87449
ECM2	1.03173	3.20331	5.01632	2.04e-05	0.00166157	2.77386
TRIP13	-0.537499	2.11267	-5.00295	2.12e-05	0.00166157	2.73763
POLE3	-0.280325	2.38933	-4.99979	2.14e-05	0.00166157	2.72905
TXNIP	0.898624	4.32187	4.99577	2.17e-05	0.00166157	2.71816
XPC	0.497271	3.19566	4.98873	2.21e-05	0.00166157	2.69907
PLXDC2	0.773752	2.36307	4.98553	2.23e-05	0.00166157	2.69039
DVL1	-0.570513	2.98426	-4.98001	2.27e-05	0.00166157	2.67542
ITK	1.78028	2.17906	4.9784	2.28e-05	0.00166157	2.67106
POSTN	1.8905	3.74972	4.97748	2.29e-05	0.00166157	2.66858
UBAP1	-0.421939	2.81332	-4.95792	2.42e-05	0.00173428	2.61556
ATP2A2	-0.769492	4.56389	-4.9442	2.51e-05	0.00175625	2.57841
SNRNP25	-0.52572	3.23183	-4.94169	2.53e-05	0.00175625	2.57161
PCOLCE2	0.792865	3.38012	4.94001	2.54e-05	0.00175625	2.56706
EVI2A	1.21849	2.60992	4.92797	2.63e-05	0.00179516	2.53445
BRD3	0.338538	3.10856	4.92027	2.69e-05	0.00181258	2.51357
RRAD	-1.82419	3.29322	-4.90151	2.84e-05	0.00188097	2.4628
PTP4A3	-0.899506	3.27705	-4.89882	2.86e-05	0.00188097	2.45551
WWP1	-0.448196	2.86788	-4.88047	3.02e-05	0.00195884	2.40585
KCND3	-0.625523	2.42761	-4.86852	3.12e-05	0.00200317	2.37352
ETV5	0.685834	2.7434	4.853	3.26e-05	0.00206984	2.33152
COPZ2	0.412326	3.20643	4.82474	3.54e-05	0.00221839	2.2551
PARP8	0.990718	2.57681	4.81511	3.64e-05	0.00224748	2.22909
MSRA	-0.354283	3.40081	-4.81224	3.67e-05	0.00224748	2.22132
LY75	1.33675	3.15279	4.80501	3.74e-05	0.00226891	2.2018
LARP6	-0.578322	3.38006	-4.79009	3.91e-05	0.00234182	2.16148
LOXL1	0.945908	3.21725	4.78176	4e-05	0.00235048	2.13897
HSP90B1	0.452504	2.91668	4.77948	4.03e-05	0.00235048	2.13281
MXRA8	0.742133	3.23897	4.77745	4.05e-05	0.00235048	2.12735
CCDC28A	0.539448	2.8154	4.77222	4.11e-05	0.00236077	2.11323
ABHD5	-0.382571	2.27911	-4.76197	4.24e-05	0.00240203	2.08555
ISLR	1.08586	3.0197	4.75887	4.27e-05	0.00240203	2.07719
CCN2	1.4145	3.20294	4.74666	4.42e-05	0.00246196	2.04422
LTBP2	1.65447	3.55936	4.73882	4.52e-05	0.00247605	2.02306
RAB9A	-0.507131	3.03943	-4.73428	4.58e-05	0.00247605	2.01083
SSR4	0.513038	3.46656	4.73411	4.59e-05	0.00247605	2.01035
EVI2B	1.28872	2.62553	4.72223	4.74e-05	0.00252499	1.97831
CXCR4	1.75686	2.00907	4.72016	4.77e-05	0.00252499	1.97273
CALCOCO2	-0.434655	3.76116	-4.71701	4.82e-05	0.00252499	1.96423
TMEM251	-0.490393	2.71248	-4.71105	4.9e-05	0.00254381	1.94818
EGLN1	-0.622223	2.97769	-4.70623	4.97e-05	0.00255479	1.93517
NR4A3	-1.9159	3.32928	-4.66891	5.52e-05	0.0027934	1.83462
PENK	1.52485	2.52683	4.66839	5.53e-05	0.0027934	1.83322
MED17	0.398453	2.89098	4.65715	5.71e-05	0.00285794	1.80296
CINP	-0.410897	2.56105	-4.64528	5.91e-05	0.00291249	1.77103
E2F8	-1.14421	1.79944	-4.6432	5.94e-05	0.00291249	1.76542
FMOD	1.38593	3.58351	4.641	5.98e-05	0.00291249	1.75949
IFT20	0.490789	2.97467	4.63445	6.09e-05	0.00291824	1.74189
PMVK	-0.444188	2.84517	-4.63409	6.1e-05	0.00291824	1.74093
EVL	0.4977	2.7644	4.6045	6.64e-05	0.00311635	1.66136
EXOC1	0.398747	3.08222	4.60405	6.65e-05	0.00311635	1.66014
JADE1	0.412764	2.95219	4.60193	6.69e-05	0.00311635	1.65444
USP11	0.429228	3.21935	4.59805	6.76e-05	0.00312429	1.64401
PDIA6	0.300294	2.9127	4.5938	6.84e-05	0.00313576	1.63259
PTGER3	-0.80043	2.1693	-4.58423	7.03e-05	0.00318468	1.60689
DDIT4	1.02392	2.53146	4.58076	7.1e-05	0.00318468	1.59757
EIF3M	-0.363076	2.59605	-4.57693	7.18e-05	0.00318468	1.58729
GOLGA3	0.399412	3.04252	4.57675	7.18e-05	0.00318468	1.58679
NUP98	-0.432052	2.91818	-4.57372	7.25e-05	0.0031849	1.57866
MN1	0.756324	2.8838	4.57023	7.32e-05	0.0031849	1.56929
ADGRL1	-0.516528	2.88207	-4.56825	7.36e-05	0.0031849	1.564
FNBP1	0.543597	2.75824	4.55701	7.6e-05	0.00324946	1.53381
PKD2	0.437404	2.91971	4.55351	7.67e-05	0.00324946	1.52444
RAP2A	0.391445	2.97141	4.55293	7.69e-05	0.00324946	1.52287
EZH1	0.363551	3.20134	4.53547	8.08e-05	0.00338863	1.47604
TMEM38B	-0.519905	2.98549	-4.5245	8.33e-05	0.00346931	1.44663
NOTCH2NLA	0.724787	3.01662	4.51314	8.61e-05	0.00355594	1.41621
ZBTB43	-0.412019	2.84666	-4.50561	8.79e-05	0.00358341	1.39604
CD59	-0.61425	4.07437	-4.50277	8.87e-05	0.00358341	1.38841
SDHAF3	-0.406062	2.14327	-4.50213	8.88e-05	0.00358341	1.3867
ZSCAN5A	-0.55183	2.27372	-4.49866	8.97e-05	0.00358341	1.3774
RAB31	0.656294	3.07309	4.49735	9e-05	0.00358341	1.3739
MSX1	-0.830789	2.31616	-4.49061	9.18e-05	0.0036262	1.35586
KEAP1	-0.316434	2.84595	-4.48571	9.31e-05	0.00365051	1.34275
MAPKAP1	-0.333717	2.76514	-4.48011	9.45e-05	0.00366144	1.32777
SETBP1	0.574643	2.78541	4.47962	9.47e-05	0.00366144	1.32647
NFIL3	-0.894948	3.18788	-4.45988	0.000100131	0.00384516	1.27366
RESF1	0.641054	2.53011	4.45264	0.000102209	0.00386565	1.2543
TFE3	-0.520105	3.08559	-4.45205	0.000102379	0.00386565	1.25274
SLIT2	0.707402	2.67842	4.44987	0.000103015	0.00386565	1.2469
ACE2	1.12315	3.09319	4.44655	0.00010399	0.00386565	1.23803
KCNN2	-1.06017	2.36982	-4.44433	0.000104645	0.00386565	1.23211
SPRY2	0.304586	3.13106	4.44342	0.000104918	0.00386565	1.22966
MXRA5	1.31967	3.19854	4.43669	0.000106936	0.00388424	1.2117
MYH10	0.663163	3.61684	4.43522	0.000107385	0.00388424	1.20776
LUM	1.28657	3.52739	4.43366	0.000107861	0.00388424	1.2036
F2R	0.798745	2.59007	4.43195	0.000108384	0.00388424	1.19903
UCHL5	-0.369038	2.29124	-4.42756	0.000109742	0.00388424	1.1873
IL10RA	1.17899	2.83929	4.42749	0.000109761	0.00388424	1.18714
CEP112	-0.48481	1.77839	-4.42245	0.000111341	0.00388424	1.17367
SCRG1	1.13968	2.99559	4.42166	0.000111591	0.00388424	1.17157
DCAF11	-0.388334	2.94377	-4.42089	0.000111833	0.00388424	1.16952
IP6K2	0.476782	2.63988	4.41384	0.000114092	0.00393505	1.15069
SCUBE2	1.08563	2.90668	4.4101	0.000115305	0.00393505	1.14072
P2RY14	0.64158	2.09328	4.40962	0.000115461	0.00393505	1.13945
RBM25	0.301387	2.83192	4.4003	0.00011855	0.00400394	1.11458
SV2C	-0.895446	2.10127	-4.39911	0.000118951	0.00400394	1.11141
ANGEL2	0.310384	2.32513	4.39041	0.000121917	0.00407861	1.08821
DUSP8	-0.53842	2.40304	-4.37492	0.000127377	0.00423529	1.04695
CD84	1.35294	2.58086	4.37201	0.000128431	0.00424444	1.0392
RIPOR2	0.830639	2.30271	4.36239	0.000131972	0.00433519	1.01359
COPS5	-0.399357	3.42589	-4.35412	0.000135095	0.00441122	0.991568
DENND5B	-0.399119	1.94351	-4.34952	0.000136863	0.00443587	0.979326
LYVE1	-1.14428	2.62216	-4.34794	0.000137477	0.00443587	0.975115
SYT11	0.449483	2.42233	4.34065	0.000140337	0.00450152	0.955735
BACH2	0.535553	2.27874	4.33699	0.000141796	0.00450579	0.946001
FLAD1	-0.310023	2.51558	-4.334	0.000142997	0.00450579	0.938059
FAM172A	0.314743	2.80724	4.33156	0.000143987	0.00450579	0.93157
SERPINE2	1.02982	3.61536	4.3277	0.000145565	0.00450579	0.921309
TAPBPL	0.629074	2.62878	4.32675	0.000145956	0.00450579	0.918786
KLHL3	0.735	3.47899	4.32663	0.000146004	0.00450579	0.918476
ADA2	0.789533	3.60034	4.32447	0.000146899	0.00450579	0.912726
BPGM	-0.341159	2.02669	-4.32403	0.000147081	0.00450579	0.911562
PIP4K2A	0.680146	2.65421	4.30491	0.000155238	0.00471839	0.860772
PRPSAP1	-0.332408	3.01113	-4.30172	0.000156641	0.00471839	0.852303
RITA1	-0.442284	2.31934	-4.30141	0.000156776	0.00471839	0.851493
MTMR4	0.420252	2.6763	4.29639	0.000159012	0.00471839	0.83817
CTSH	0.552839	3.02083	4.29596	0.000159204	0.00471839	0.837034
PIK3R1	0.841481	2.85243	4.29595	0.000159212	0.00471839	0.836988
RBM5	0.303594	2.98998	4.29062	0.000161621	0.00476324	0.82286
LACTB2	-0.444901	2.90559	-4.28876	0.000162472	0.00476324	0.817919
HMGB2	0.490165	2.93862	4.28653	0.000163497	0.00476765	0.812004
AGTPBP1	-0.334508	2.78579	-4.28004	0.000166513	0.00482977	0.794811
FAT4	0.457414	2.66039	4.27808	0.000167438	0.0048309	0.789601
PPP1R10	0.428808	2.87934	4.27496	0.000168918	0.00484795	0.781324
SEC31A	0.325938	3.57703	4.26615	0.000173162	0.00494372	0.757989
PPP2R2B	1.31738	2.27494	4.26168	0.000175353	0.00498022	0.74616
PRDX6	-0.535653	3.26489	-4.25962	0.000176374	0.00498325	0.740704
KMT2A	0.386525	2.76852	4.25538	0.000178496	0.00501722	0.729455
HLA-DPA1	1.01547	3.62819	4.24585	0.00018335	0.00510011	0.70423
SVEP1	0.791551	3.28315	4.24438	0.00018411	0.00510011	0.700343
PLBD1	0.451352	3.58134	4.24222	0.000185228	0.00510011	0.694647
PTN	0.831401	3.22696	4.24026	0.000186256	0.00510011	0.689444
USP4	0.284274	3.18975	4.2388	0.000187021	0.00510011	0.685592
DDX1	-0.301165	3.30732	-4.23873	0.000187057	0.00510011	0.68541
ARHGDIB	0.732188	3.15436	4.23565	0.000188685	0.00511889	0.677266
NCKAP1	-0.43237	2.60708	-4.23369	0.000189732	0.00512183	0.67206
MALT1	-0.394301	1.9628	-4.21797	0.000198308	0.00532697	0.630505
DBNDD2	-0.757372	4.00005	-4.20903	0.00020335	0.0054154	0.606912
MPP2	-0.545989	2.87224	-4.20862	0.000203586	0.0054154	0.605818
FBLN5	0.651821	3.70734	4.20225	0.000207261	0.00548637	0.589009
IGFBP2	1.02197	3.34141	4.19374	0.000212277	0.00554949	0.566538
SLC39A14	-0.661669	3.4797	-4.19336	0.000212504	0.00554949	0.565534
ERP44	0.391612	2.94904	4.19303	0.000212698	0.00554949	0.564676
NOL8	0.498288	2.60996	4.18823	0.000215583	0.00558591	0.552016
PLXNC1	0.898458	2.71579	4.18731	0.000216143	0.00558591	0.549582
DYNLL1	0.399066	3.27611	4.18444	0.000217891	0.00560453	0.542012
ZMYND8	0.57306	2.72249	4.18169	0.000219578	0.00560784	0.534767
LZTFL1	0.45558	2.20119	4.18089	0.000220077	0.00560784	0.532637
MKKS	-0.32308	2.7966	-4.17788	0.000221938	0.00562896	0.524725
HSPA8	0.404712	3.79004	4.17403	0.000224349	0.00565257	0.514576
DOP1B	-0.520115	2.06191	-4.17276	0.000225154	0.00565257	0.51121
AEBP1	1.14472	3.18784	4.17145	0.000225978	0.00565257	0.507777
EI24	-0.413683	2.83507	-4.16813	0.000228097	0.00567888	0.499011
ITGB1BP2	-0.450632	3.89539	-4.16654	0.000229113	0.00567888	0.494837
ZNF672	-0.324215	2.97831	-4.1632	0.000231274	0.00570651	0.486019
HINT1	-0.350375	3.38587	-4.15642	0.000235707	0.00578969	0.468188
KCNIP2	-1.43665	2.572	-4.1394	0.000247225	0.00604537	0.423388
NUBP1	-0.255368	2.84298	-4.13711	0.000248818	0.00605716	0.417358
NACC2	-0.714629	2.93181	-4.133	0.000251693	0.0060886	0.406571
IPPK	-0.479859	2.51139	-4.1313	0.000252898	0.0060886	0.402087
RPH3A	-0.371216	2.37056	-4.12987	0.000253913	0.0060886	0.398329
PLA2G12A	-0.428708	2.40744	-4.12894	0.000254576	0.0060886	0.395881
PKNOX2	-0.412793	2.76691	-4.12102	0.000260277	0.00619778	0.375089
VIM	0.562599	3.76091	4.11416	0.000265325	0.00628678	0.357059
DAPP1	1.3053	3.12402	4.11282	0.00026632	0.00628678	0.353544
RANBP6	-0.577113	2.87995	-4.09157	0.000282625	0.0066429	0.297783
NQO2	-0.654772	3.04311	-4.07971	0.000292146	0.00683721	0.266699
ABCC5	-0.581015	3.1873	-4.07503	0.000295988	0.00689638	0.254442
TAF6L	-0.276603	2.51067	-4.07356	0.000297203	0.00689638	0.250598
CCND1	0.383384	2.88366	4.06569	0.000303803	0.00701964	0.229998
FBXW7	-0.526214	3.17511	-4.06183	0.000307095	0.0070343	0.219888
COL14A1	1.05118	2.74006	4.06166	0.00030724	0.0070343	0.219447
PGD	-0.378185	2.32129	-4.05936	0.000309221	0.0070343	0.213418
CEP70	-0.415806	2.46344	-4.05755	0.00031078	0.0070343	0.208701
HSF2	-0.401323	2.21128	-4.05743	0.000310887	0.0070343	0.20838
EML1	-0.397015	2.25724	-4.04913	0.00031817	0.00716935	0.186663
PIK3R5	0.65773	2.60219	4.04054	0.000325874	0.00729088	0.164231
CDKN1B	0.462514	3.24489	4.04014	0.000326238	0.00729088	0.163185
SLC2A4	-0.57174	2.57588	-4.03561	0.000330384	0.00731712	0.151345
ABCG1	-0.675383	2.56914	-4.03332	0.000332501	0.00731712	0.145357
TTC3	0.462253	3.00765	4.03298	0.000332812	0.00731712	0.144481
NUDT4	-0.697185	2.96475	-4.0314	0.000334278	0.00731712	0.14036
MICALL1	-0.566733	1.96904	-4.03017	0.000335434	0.00731712	0.137125
PRKCB	1.16889	2.50564	4.03013	0.000335463	0.00731712	0.137043
UAP1	-0.597504	2.99389	-4.02784	0.000337615	0.00733473	0.131049
BCL11B	0.915969	1.87991	4.02637	0.000339001	0.0073356	0.127209
ZEB1	0.3736	3.21505	4.02157	0.000343556	0.00738737	0.114698
KDM3A	0.360839	2.85925	4.02032	0.000344757	0.00738737	0.111426
RAP1GDS1	0.331314	2.60397	4.01852	0.000346487	0.00738737	0.106737
SRRM1	0.254115	3.52206	4.01715	0.000347813	0.00738737	0.103158
RHOF	-0.479029	2.57215	-4.01499	0.000349911	0.00738737	0.0975197
TNIP2	-0.431395	2.9354	-4.01453	0.000350358	0.00738737	0.0963228
RPS19	0.293762	3.14395	4.014	0.000350877	0.00738737	0.0949377
JMJD6	-0.611367	2.65427	-4.00926	0.000355532	0.00745659	0.0825865
MET	-0.671738	2.60458	-4.00779	0.000356993	0.00745856	0.0787421
EMCN	-0.674245	3.13599	-4.0024	0.000362384	0.00754229	0.0646982
CYTIP	1.19065	1.98336	3.99772	0.000367126	0.00761194	0.0525152
PTPRC	1.05453	2.42598	3.98852	0.000376643	0.00777967	0.0285406
CSF1R	1.05829	3.40936	3.98332	0.000382116	0.00780779	0.0150251
CRYBG1	0.957995	2.49283	3.98305	0.000382412	0.00780779	0.0143012
CLK1	0.488734	2.79855	3.98189	0.000383639	0.00780779	0.0112991
BGN	0.865607	3.51425	3.98181	0.000383732	0.00780779	0.0110734
MRPS12	-0.588874	2.89132	-3.97764	0.000388198	0.0078693	0.000235057
NPPA	1.53129	4.63393	3.97166	0.000394692	0.00797132	-0.015304
LASP1	0.436979	2.79123	3.96604	0.000400908	0.00804567	-0.0299367
BBS4	0.431352	2.60772	3.96515	0.000401891	0.00804567	-0.0322305
WASHC4	0.344543	2.91476	3.96434	0.0004028	0.00804567	-0.0343459
HLA-DRB1	1.04566	4.42405	3.96162	0.000405852	0.00807704	-0.0414148
NOP53	0.362516	3.94876	3.95833	0.000409576	0.00812151	-0.0499666
FYN	0.555964	2.68209	3.95583	0.000412422	0.00814832	-0.0564505
SMPDL3A	-0.541704	2.49797	-3.94642	0.000423323	0.0083335	-0.0808751
DDX60	0.572282	2.45802	3.9338	0.000438392	0.00859911	-0.113616
HMBS	-0.418573	2.76457	-3.92703	0.000446693	0.00873052	-0.131171
RANBP10	0.275451	2.78163	3.92518	0.000448976	0.00874135	-0.135942
C1ORF35	0.408762	2.7012	3.924	0.000450453	0.00874135	-0.139015
HLA-E	0.645583	3.74798	3.9218	0.000453201	0.00876349	-0.144706
COMMD8	0.353527	3.34006	3.91652	0.000459877	0.00886116	-0.15839
EIF4EBP2	-0.448201	3.11344	-3.90863	0.000470025	0.00902482	-0.178812
RPL27A	-0.85481	2.93342	-3.90687	0.000472315	0.00903697	-0.183359
ECT2	-0.478241	1.82904	-3.89593	0.000486819	0.0092819	-0.211651
IRS1	-0.565916	2.16166	-3.89111	0.000493337	0.0093734	-0.224089
SEPTIN8	0.380341	2.83663	3.88751	0.000498271	0.00943428	-0.233397
ADGRA3	-0.372753	2.64674	-3.88095	0.000507387	0.00957364	-0.25035
MNS1	0.796739	1.93872	3.867	0.000527299	0.00991505	-0.286341
GPRC5B	-0.466485	3.1703	-3.86427	0.000531282	0.0099556	-0.293374
NDUFB6	-0.392905	3.72564	-3.86049	0.000536841	0.0100253	-0.303105
ARGLU1	0.475317	3.14979	3.85383	0.000546791	0.0101763	-0.320269
ADAMTS9	-1.00252	2.54822	-3.83982	0.00056831	0.0105408	-0.35634
ELOVL5	-0.461972	2.20076	-3.83448	0.000576723	0.0106124	-0.37007
HDAC9	0.610027	2.77161	3.83437	0.000576905	0.0106124	-0.370364
RASGRP3	-0.523808	2.68822	-3.83367	0.000578007	0.0106124	-0.372147
DDAH1	0.652145	3.45465	3.83005	0.000583797	0.010649	-0.381458
NIPSNAP3B	-0.543718	3.17944	-3.82998	0.000583908	0.010649	-0.381637
NOP16	-0.457085	2.33638	-3.82791	0.000587255	0.0106743	-0.386975
AFF1	0.453407	2.99066	3.8255	0.000591157	0.0107096	-0.393162
RAP1GAP2	-0.896412	2.97404	-3.82111	0.000598342	0.0108038	-0.404446
AMOTL2	0.550508	3.20381	3.81794	0.000603567	0.0108622	-0.412567
SLA	1.12718	2.84587	3.81645	0.000606056	0.0108711	-0.416411
COQ2	-0.468527	2.61089	-3.81304	0.000611766	0.0109198	-0.425168
BCR	-0.329959	2.57435	-3.81148	0.000614379	0.0109198	-0.429149
ME1	-0.435035	2.79097	-3.81125	0.000614779	0.0109198	-0.429756
COQ8A	-0.569213	3.63261	-3.80653	0.000622802	0.0109991	-0.441864
PGPEP1	-0.250589	2.85709	-3.80516	0.000625149	0.0109991	-0.445376
DZIP1	0.337894	2.70432	3.80507	0.000625295	0.0109991	-0.445594
TRIM14	0.868024	2.97305	3.80182	0.000630915	0.0110623	-0.453948
PHLDA2	-0.748415	1.91891	-3.7991	0.000635638	0.0111094	-0.460911
RFC3	-0.353836	2.22713	-3.79647	0.000640247	0.0111542	-0.467656
NRF1	-0.28626	2.39674	-3.78805	0.000655216	0.0113167	-0.48923
SH3BP5	0.673718	2.95571	3.78709	0.000656946	0.0113167	-0.491692
LAMA2	0.500134	3.71885	3.78694	0.000657221	0.0113167	-0.492081
ELMO1	0.431488	2.53654	3.78651	0.000657982	0.0113167	-0.493161
ZMPSTE24	-0.360136	3.67501	-3.78543	0.00065995	0.0113167	-0.49595
RNF5	-0.527778	3.32238	-3.78258	0.000665116	0.0113695	-0.503226
KDM6B	-0.351118	2.95028	-3.77989	0.000670041	0.0114022	-0.510112
VIPAS39	0.400302	2.89577	3.77926	0.000671211	0.0114022	-0.511741
EYA4	-0.598147	2.15399	-3.77427	0.000680442	0.0114815	-0.524486
SYNC	-0.524022	2.38269	-3.77335	0.00068217	0.0114815	-0.526853
CCNG2	0.634146	2.33233	3.77319	0.000682474	0.0114815	-0.527269
BRD8	0.280674	2.73195	3.77187	0.000684936	0.0114815	-0.530629
TUG1	0.267892	3.30469	3.77013	0.000688211	0.0114815	-0.53508
SPRY1	0.422032	3.5044	3.76893	0.000690489	0.0114815	-0.538163
STX16	0.370988	3.27833	3.76886	0.000690616	0.0114815	-0.538336
SCAF11	0.297845	3.02454	3.76493	0.000698093	0.0115682	-0.548383
OLFML1	0.655947	2.92112	3.76389	0.000700073	0.0115682	-0.551025
STYK1	1.20133	1.5847	3.76099	0.00070567	0.0116254	-0.558454
TBX3	-0.637394	2.79448	-3.75338	0.000720515	0.0118342	-0.577873
COL4A3	0.776412	2.47275	3.74609	0.000735036	0.0120365	-0.596484
NELL2	1.24745	2.33969	3.74365	0.000739961	0.0120809	-0.602712
STX3	-0.381974	2.46342	-3.73443	0.000758848	0.0123196	-0.626214
ASCC3	0.436246	2.89011	3.73396	0.000759833	0.0123196	-0.627423
SELE	-1.31363	2.03557	-3.73087	0.000766265	0.0123196	-0.635282
SNU13	-0.335668	3.19339	-3.73029	0.000767484	0.0123196	-0.636764
GTF2IRD1	-0.525436	2.85867	-3.73018	0.000767704	0.0123196	-0.637032
FOXN3	-0.323529	3.22316	-3.72906	0.000770067	0.0123196	-0.639897
HAMP	-1.32595	2.77454	-3.7289	0.000770398	0.0123196	-0.640297
CD53	1.18986	3.13457	3.72016	0.00078902	0.0125608	-0.662561
MRS2	-0.333518	2.65014	-3.71875	0.000792054	0.0125608	-0.666139
SASH3	1.02717	2.54489	3.7186	0.000792393	0.0125608	-0.666538
METTL7A	0.718937	2.44641	3.71361	0.000803252	0.012696	-0.679224
STAT4	0.891044	2.76803	3.70862	0.000814266	0.0128306	-0.691916
MAPKAPK3	-0.496795	3.68506	-3.70763	0.000816471	0.0128306	-0.694435
C1ORF115	-0.579375	3.13537	-3.70085	0.000831708	0.0130191	-0.711664
GNAO1	-0.521837	2.48223	-3.70017	0.000833242	0.0130191	-0.713381
DDX17	0.461338	3.28398	3.69838	0.000837313	0.0130453	-0.717922
NISCH	0.376573	3.38307	3.69219	0.000851552	0.0132294	-0.733631
PTPRO	1.15072	4.85149	3.68795	0.000861464	0.0132914	-0.74441
CREB3L2	0.384843	3.08728	3.68772	0.000861999	0.0132914	-0.744989
ARL6IP1	0.35974	2.58354	3.68735	0.000862857	0.0132914	-0.745916
PLEKHO1	-0.63029	3.00752	-3.68593	0.000866215	0.0133056	-0.749534
NFIB	0.32438	3.73637	3.68406	0.000870625	0.0133357	-0.754263
PABPC1	0.407601	3.59629	3.68103	0.000877844	0.013408	-0.761953
LEPROTL1	0.305225	3.21177	3.67922	0.000882181	0.013408	-0.766543
MEOX2	0.651566	2.18264	3.67741	0.000886539	0.013408	-0.771133
ACOT13	-0.344078	3.36325	-3.6766	0.000888482	0.013408	-0.773171
TRIM8	-0.403639	2.8111	-3.67655	0.000888612	0.013408	-0.773307
CORIN	-1.46927	2.86874	-3.67593	0.000890099	0.013408	-0.774864
SELL	1.21766	3.07152	3.6745	0.000893573	0.0134233	-0.778491
ZFHX3	0.379002	2.45412	3.66821	0.000909001	0.0136175	-0.79443
MRPL33	-0.409719	3.88085	-3.66466	0.000917817	0.0137119	-0.803416
OLFML3	0.753164	3.32285	3.66341	0.000920953	0.0137212	-0.806591
CRYM	0.66189	4.26982	3.66208	0.000924272	0.0137331	-0.80994
PATZ1	0.471437	2.61699	3.65961	0.000930511	0.0137883	-0.816203
FKBP3	-0.332256	2.81823	-3.65469	0.000943028	0.0139359	-0.82864
RAF1	-0.393216	3.29175	-3.65251	0.000948637	0.0139615	-0.834159
STRAP	-0.360727	3.19454	-3.65195	0.000950068	0.0139615	-0.835562
NAA50	-0.33037	2.41746	-3.65103	0.000952442	0.0139615	-0.837885
RFC2	-0.293312	1.91846	-3.64884	0.000958136	0.013988	-0.843432
NOX4	0.883905	2.64593	3.64836	0.000959385	0.013988	-0.844645
SULF1	0.710263	2.92668	3.64132	0.000977877	0.0142196	-0.86241
AAMDC	-0.481982	3.13262	-3.63798	0.000986798	0.0142977	-0.870859
UQCRB	-0.370635	3.75846	-3.63691	0.000989665	0.0142977	-0.873559
TJP1	0.27097	3.2915	3.63519	0.000994301	0.0142977	-0.877907
KCNJ5	-0.748454	2.93758	-3.63476	0.000995438	0.0142977	-0.87897
DNAJB5	-0.632383	3.19688	-3.63371	0.0009983	0.0142977	-0.88164
FGF1	0.417023	3.37709	3.63345	0.000998978	0.0142977	-0.882273
NCDN	0.393032	2.90037	3.6321	0.00100266	0.0143128	-0.885692
GJA4	-0.436266	2.76315	-3.62908	0.0010109	0.0143587	-0.893305
ANKRD36B	0.699691	2.0899	3.62899	0.00101114	0.0143587	-0.89353
SLC30A1	0.534053	3.0085	3.62759	0.00101499	0.014376	-0.897068
ELN	0.77371	3.2814	3.6239	0.0010252	0.0144829	-0.906372
ADGRG6	0.743388	2.18305	3.61983	0.00103655	0.0145386	-0.916614
SORL1	0.46384	2.63495	3.6192	0.00103833	0.0145386	-0.918208
ANXA3	-0.607748	2.48592	-3.61917	0.00103841	0.0145386	-0.918283
UBE2A	-0.26972	3.05166	-3.61868	0.0010398	0.0145386	-0.919526
DEK	-0.36311	2.87349	-3.61571	0.00104819	0.0145941	-0.926996
ZNF768	-0.403364	2.58304	-3.61538	0.00104913	0.0145941	-0.927831
PEX14	-0.271671	2.22462	-3.61353	0.0010544	0.0145943	-0.932487
ZMYM6	0.391593	2.67779	3.6127	0.00105676	0.0145943	-0.934573
FXN	-0.317305	2.52733	-3.61256	0.00105717	0.0145943	-0.934934
OSMR	-0.645192	2.68845	-3.61063	0.0010627	0.0146058	-0.939784
MAIP1	-0.301348	2.86586	-3.6104	0.00106336	0.0146058	-0.94036
PIAS1	0.276464	2.67026	3.60712	0.00107286	0.0146992	-0.948627
SPARC	0.497664	3.70882	3.60593	0.00107631	0.0147095	-0.951611
IMP4	-0.337375	2.94565	-3.60282	0.00108541	0.0147969	-0.959442
CDK19	0.400509	2.58623	3.59844	0.00109834	0.0149309	-0.970448
SGCE	0.419831	2.89609	3.59764	0.00110072	0.0149309	-0.972457
PAPSS1	0.483526	2.94549	3.59657	0.00110391	0.014937	-0.975148
EEF1A1	0.517375	3.6126	3.59307	0.00111442	0.0150175	-0.983956
ADK	-0.405086	2.38496	-3.59249	0.00111615	0.0150175	-0.985401
BCL7B	-0.459057	3.18925	-3.59184	0.00111812	0.0150175	-0.987037
EGF	-0.531963	2.60923	-3.58989	0.00112402	0.0150596	-0.991926
TMEM40	-0.47483	2.10531	-3.58841	0.00112853	0.0150721	-0.995649
TMSB4X	0.54942	3.32768	3.58777	0.00113047	0.0150721	-0.997249
TAB2	-0.282341	2.99626	-3.58673	0.00113366	0.0150771	-0.999861
RNF10	-0.399571	3.2363	-3.58584	0.00113638	0.0150771	-1.00209
LRRFIP2	-0.312663	2.97073	-3.57915	0.0011571	0.0152947	-1.01888
NSDHL	-0.432461	2.01845	-3.57874	0.00115839	0.0152947	-1.01992
NDUFA5	-0.344905	3.67153	-3.57548	0.00116862	0.0153778	-1.02809
PPP2R5C	-0.331788	2.94962	-3.57494	0.00117033	0.0153778	-1.02944
TRAPPC12	-0.395861	3.00327	-3.57265	0.0011776	0.0153824	-1.0352
TRIM37	-0.321239	2.90391	-3.57257	0.00117785	0.0153824	-1.0354
MFN1	-0.285344	2.77934	-3.57216	0.00117914	0.0153824	-1.03641
EIF4G1	-0.323998	2.71789	-3.56982	0.00118661	0.0154429	-1.04227
CACYBP	-0.293197	2.48626	-3.56799	0.00119248	0.0154638	-1.04686
HEXIM1	-0.358112	2.83565	-3.56755	0.00119388	0.0154638	-1.04795
EIF5B	-0.323838	3.01938	-3.56353	0.00120692	0.0155891	-1.05804
C15ORF39	-0.403253	2.60078	-3.56281	0.00120927	0.0155891	-1.05985
OPLAH	-0.594194	2.70866	-3.5591	0.00122141	0.0157084	-1.06912
PLAGL1	0.549057	2.69177	3.55516	0.00123445	0.0158387	-1.07898
SMCO4	-0.446523	3.04403	-3.55382	0.00123893	0.0158575	-1.08234
PEX13	-0.327805	2.45576	-3.55058	0.00124979	0.0158575	-1.09045
TEK	-0.451289	2.50644	-3.55038	0.00125043	0.0158575	-1.09093
CEACAM1	-0.661309	2.43599	-3.54957	0.00125318	0.0158575	-1.09297
KPNA2	-0.53064	2.08214	-3.54953	0.00125332	0.0158575	-1.09307
RHAG	-0.635126	1.58147	-3.54932	0.00125402	0.0158575	-1.09358
KLC2	-0.33249	3.04894	-3.54785	0.00125898	0.0158575	-1.09725
NDUFB2	-0.34198	3.73982	-3.5478	0.00125917	0.0158575	-1.09739
KIF13B	0.453328	2.89371	3.54542	0.00126727	0.0158654	-1.10335
LCP2	0.757272	2.17893	3.54536	0.00126746	0.0158654	-1.10348
GPX3	-0.71875	4.29484	-3.54455	0.00127024	0.0158654	-1.10551
PTS	-0.299002	3.04513	-3.54419	0.00127145	0.0158654	-1.1064
SPTSSA	-0.327625	2.53679	-3.54168	0.00128007	0.0159151	-1.11267
FASTK	-0.271096	3.49983	-3.54134	0.00128126	0.0159151	-1.11354
ECSIT	-0.474663	2.79385	-3.53964	0.00128712	0.0159515	-1.11777
RTCB	-0.225958	2.88136	-3.53671	0.00129731	0.0160414	-1.12509
CD74	0.984855	4.45345	3.53555	0.00130135	0.0160549	-1.12798
SPTBN1	0.34708	3.59639	3.53455	0.00130486	0.0160619	-1.13048
SERF1A	-0.498097	1.8095	-3.53005	0.00132075	0.0162209	-1.14171
NCKIPSD	0.562708	3.02789	3.52655	0.00133325	0.0163013	-1.15044
BCL2L13	-0.290742	3.15459	-3.52654	0.00133328	0.0163013	-1.15047
CCL2	-1.64944	3.80511	-3.51954	0.0013586	0.0165737	-1.16792
NPR3	1.02153	3.10351	3.51847	0.00136251	0.0165843	-1.17059
ZCCHC2	-0.527518	2.53477	-3.51708	0.00136758	0.016609	-1.17404
EIF2B2	-0.299662	3.08216	-3.51468	0.00137642	0.0166791	-1.18001
LARGE1	-0.531051	2.86439	-3.51265	0.00138396	0.0167183	-1.18508
TEAD1	-0.374399	2.21031	-3.51216	0.00138578	0.0167183	-1.1863
ZC3HAV1	0.630368	2.74627	3.5093	0.00139647	0.0167752	-1.19342
PSMD3	-0.373668	2.39832	-3.50925	0.00139665	0.0167752	-1.19354
CDK5RAP3	0.335027	2.95812	3.50751	0.00140317	0.0168165	-1.19786
AHCYL1	-0.241152	2.64461	-3.50532	0.00141146	0.0168443	-1.20332
PCNX2	0.524496	2.30561	3.50463	0.00141407	0.0168443	-1.20504
HSPB3	-0.59232	5.0203	-3.50444	0.00141476	0.0168443	-1.20549
LTBP1	0.511796	3.26846	3.49807	0.00143917	0.0170884	-1.22135
FASTKD2	-0.334433	2.86035	-3.49745	0.00144153	0.0170884	-1.22287
SETX	0.292719	2.82548	3.49474	0.00145205	0.0171467	-1.22961
FERMT2	-0.365746	3.02341	-3.49411	0.0014545	0.0171467	-1.23118
ATG9A	-0.415352	2.97447	-3.49376	0.00145588	0.0171467	-1.23206
ANKMY2	0.423355	3.27855	3.49288	0.0014593	0.0171499	-1.23423
AKAP10	0.522638	2.65946	3.48562	0.00148797	0.0174145	-1.25226
SESN1	0.441809	3.32176	3.48484	0.00149107	0.0174145	-1.25419
BCL6	-0.607881	3.46401	-3.48476	0.00149139	0.0174145	-1.25439
MT1E	0.616646	3.35095	3.48055	0.00150832	0.0175745	-1.26485
ZNF32	-0.359061	2.95224	-3.47475	0.00153187	0.0177795	-1.27921
SLC46A3	0.391719	2.98902	3.47446	0.00153307	0.0177795	-1.27993
RGS10	0.737016	2.0621	3.47302	0.00153901	0.0177795	-1.28352
KIFAP3	0.372846	3.46665	3.47264	0.00154057	0.0177795	-1.28446
WASF1	-0.47917	2.06059	-3.47224	0.00154221	0.0177795	-1.28544
RTN1	1.04946	2.39574	3.47034	0.00155007	0.0178247	-1.29015
CLU	0.593438	2.84563	3.46971	0.00155268	0.0178247	-1.29171
NFKBIA	0.498015	3.21961	3.46866	0.00155705	0.0178373	-1.29431
PLA2G7	1.13614	1.88122	3.46601	0.0015681	0.0179263	-1.30086
STOML2	-0.328934	3.07523	-3.46336	0.00157927	0.017979	-1.30744
PSEN2	-0.415178	2.29779	-3.46335	0.00157931	0.017979	-1.30746
ZNF83	0.4577	1.85202	3.45958	0.00159528	0.0181231	-1.31678
ZDHHC4	-0.281797	2.76977	-3.45687	0.00160687	0.0182168	-1.32349
DICER1	0.220134	2.63705	3.45349	0.00162145	0.0183209	-1.33185
SLF2	0.331581	2.54737	3.45266	0.00162502	0.0183209	-1.33389
PUF60	-0.20992	3.13321	-3.45241	0.00162613	0.0183209	-1.33452
STAT3	-0.574529	3.75495	-3.45093	0.00163255	0.0183287	-1.33817
SNX1	0.304701	3.09189	3.4507	0.00163355	0.0183287	-1.33874
BCL3	-0.878922	2.24942	-3.4487	0.00164232	0.0183879	-1.34369
ADGRG1	-0.488853	2.92969	-3.44795	0.00164557	0.0183879	-1.34552
HECTD4	0.238193	2.76309	3.44632	0.00165276	0.0183982	-1.34956
RAD23A	-0.261913	3.29383	-3.44578	0.00165516	0.0183982	-1.3509
SUSD6	0.305274	3.13781	3.44545	0.00165661	0.0183982	-1.35172
AMIGO2	0.644788	2.37658	3.44126	0.00167523	0.0185672	-1.36207
MINDY3	0.249305	2.39281	3.43928	0.00168408	0.0185742	-1.36694
JAM3	0.350382	3.42293	3.43905	0.00168512	0.0185742	-1.36751
UCHL1	1.00307	3.06717	3.43883	0.00168609	0.0185742	-1.36804
CFAP298	0.225819	2.95518	3.43663	0.00169603	0.0186045	-1.37348
TSPAN32	0.670331	2.96343	3.43621	0.00169792	0.0186045	-1.37452
EIF2AK1	-0.224602	2.88064	-3.43596	0.00169907	0.0186045	-1.37514
TMEM243	0.417492	2.40134	3.43416	0.00170724	0.0186565	-1.37958
MARK3	-0.328132	2.67944	-3.42918	0.00173003	0.0188677	-1.39185
MAPKAPK2	-0.586155	3.11106	-3.42562	0.00174649	0.0190092	-1.40062
YIPF6	-0.251014	2.73814	-3.42201	0.00176337	0.0191547	-1.40952
SRPK1	-0.272483	2.15654	-3.42001	0.00177278	0.0192186	-1.41444
WDR62	-0.422678	2.7826	-3.41105	0.00181553	0.0196174	-1.43648
AKR1B1	-0.547006	3.72012	-3.4108	0.00181676	0.0196174	-1.43711
NDUFS6	-0.325642	3.47058	-3.40937	0.00182364	0.0196528	-1.44061
CRY1	-0.563127	2.08502	-3.4086	0.0018274	0.0196545	-1.44251
PLVAP	0.961106	3.17507	3.39941	0.00187257	0.0201007	-1.46509
SNRPA1	-0.322823	2.17273	-3.39826	0.00187827	0.0201222	-1.4679
CYTH4	0.771304	2.66413	3.39578	0.0018907	0.0202156	-1.474
HMGN1	0.305956	3.34316	3.39043	0.00191775	0.0204063	-1.48713
TLE2	-0.37546	3.32749	-3.38959	0.00192202	0.0204063	-1.48919
ITPRID2	-0.319584	2.92856	-3.38953	0.00192234	0.0204063	-1.48934
GFPT2	-0.849105	2.53314	-3.3893	0.0019235	0.0204063	-1.4899
ZNF143	-0.360427	2.70263	-3.38765	0.00193193	0.020434	-1.49394
FKBP4	-0.472253	2.51315	-3.38731	0.00193365	0.020434	-1.49476
NAAA	0.52612	2.8256	3.38623	0.00193924	0.020434	-1.49743
TRA2B	0.274472	2.95153	3.38579	0.00194147	0.020434	-1.49849
GAREM1	-0.486758	2.5341	-3.38514	0.00194485	0.020434	-1.5001
ELF3	-2.07617	3.14957	-3.38421	0.00194964	0.020445	-1.50237
RNF41	-0.524863	2.93479	-3.38103	0.00196615	0.0205786	-1.51017
BLNK	0.953653	2.2189	3.37712	0.0019866	0.0207528	-1.51973
PPWD1	0.282101	2.47119	3.37638	0.00199052	0.0207539	-1.52155
NES	0.53278	4.21367	3.37345	0.00200605	0.020876	-1.52873
GABBR1	0.775043	3.07362	3.37148	0.00201653	0.0209451	-1.53354
RGL1	0.479336	3.10013	3.36878	0.00203099	0.0210551	-1.54014
PEX12	0.356507	2.88601	3.36687	0.00204128	0.0211216	-1.54481
EIF4A2	0.470845	4.21957	3.36571	0.00204755	0.0211463	-1.54764
PDCD5	-0.37608	2.33761	-3.36327	0.00206086	0.0212436	-1.55363
PPP2R3A	-0.334865	3.17734	-3.36065	0.00207519	0.021351	-1.56003
HNRNPH3	0.344969	3.07401	3.35796	0.00209001	0.021463	-1.5666
RASSF4	0.438502	2.45062	3.35239	0.00212099	0.021681	-1.58019
NAMPT	-0.68729	2.91733	-3.35236	0.00212118	0.021681	-1.58027
FGF7	-0.538006	2.31123	-3.352	0.00212317	0.021681	-1.58114
TNC	1.09983	2.16229	3.34947	0.00213742	0.0217778	-1.58731
MCTP2	0.569127	2.35849	3.34856	0.00214255	0.0217778	-1.58952
RAP1A	-0.268114	3.50615	-3.34805	0.00214548	0.0217778	-1.59079
SLC4A3	-0.700563	3.73442	-3.34749	0.00214863	0.0217778	-1.59214
MNDA	0.802624	2.33651	3.3462	0.00215597	0.0217866	-1.59529
TRMT2B	-0.258765	2.56298	-3.34593	0.00215749	0.0217866	-1.59594
CREBL2	0.390621	2.9286	3.34157	0.00218247	0.0219982	-1.60657
MITF	0.307077	3.59774	3.33653	0.00221171	0.0222518	-1.61885
UBA7	0.532014	2.77908	3.3288	0.00225728	0.0226684	-1.63766
NRIP1	-0.369433	2.29128	-3.32453	0.00228281	0.0228826	-1.64804
TNK1	-0.346367	2.90308	-3.31838	0.00232014	0.0231961	-1.663
KDELR3	0.442711	3.10318	3.31798	0.00232259	0.0231961	-1.66398
CAPN1	-0.239069	2.76951	-3.31547	0.00233796	0.0232714	-1.67006
CSRP2	-0.46994	2.80415	-3.31492	0.00234137	0.0232714	-1.6714
CLK4	0.346732	2.73914	3.3143	0.0023452	0.0232714	-1.67291
WIPF1	0.616775	2.50048	3.31394	0.00234743	0.0232714	-1.67379
NSUN3	0.232536	2.66245	3.31328	0.00235147	0.0232714	-1.67537
MERTK	0.613874	2.36197	3.31228	0.0023577	0.0232909	-1.67782
RXRA	-0.300135	3.01389	-3.30698	0.00239081	0.0235752	-1.69067
FN1	0.730498	3.55275	3.30606	0.0023966	0.0235814	-1.6929
FOSL2	-0.618789	2.52046	-3.30439	0.00240715	0.0235814	-1.69695
RCAN2	-0.284478	3.85958	-3.30405	0.00240928	0.0235814	-1.69777
CELSR2	-0.520941	2.5691	-3.3039	0.00241027	0.0235814	-1.69815
BAZ2B	0.257643	2.635	3.30296	0.00241618	0.0235814	-1.7004
HIF1A	-0.419528	3.37551	-3.30107	0.00242825	0.0235814	-1.705
CHST1	-0.610061	2.19988	-3.30076	0.0024302	0.0235814	-1.70574
CREG1	0.286848	3.35011	3.30066	0.00243089	0.0235814	-1.706
CMC2	-0.384465	3.43624	-3.30045	0.00243223	0.0235814	-1.70651
PLCL2	-0.506408	2.98109	-3.30006	0.00243468	0.0235814	-1.70744
ACTA1	0.634297	6.1053	3.29449	0.00247061	0.0238447	-1.72094
PINK1	-0.277644	3.95172	-3.29449	0.00247061	0.0238447	-1.72094
PGAM2	-0.666173	3.06	-3.28994	0.00250027	0.0240883	-1.73194
COQ3	-0.291131	3.29968	-3.28468	0.00253506	0.0243804	-1.74467
TGDS	0.289614	2.50092	3.2801	0.0025657	0.0246316	-1.75573
TNS3	0.379933	3.41989	3.27827	0.00257805	0.0247067	-1.76016
GLRX5	-0.336277	3.80157	-3.27673	0.00258847	0.0247313	-1.76387
STUB1	-0.314668	3.4119	-3.27544	0.00259728	0.0247313	-1.767
KIF3B	0.234201	2.26602	3.2754	0.00259755	0.0247313	-1.7671
CENPA	1.05398	2.32928	3.27522	0.00259876	0.0247313	-1.76753
DOK5	0.638628	3.52349	3.27288	0.00261474	0.0248401	-1.77318
AREG	-1.40783	1.49073	-3.2722	0.00261943	0.0248413	-1.77482
RAB15	-0.764833	3.19866	-3.27094	0.00262807	0.02488	-1.77786
TPCN1	0.469863	3.34715	3.27013	0.00263362	0.0248893	-1.7798
LPXN	0.575711	2.71829	3.26885	0.00264247	0.0249297	-1.78289
HLA-DPB1	0.743552	3.51914	3.26764	0.00265086	0.0249567	-1.78581
PRSS23	0.708018	2.98609	3.26687	0.00265624	0.0249567	-1.78768
CPE	0.411372	2.81392	3.26646	0.00265906	0.0249567	-1.78865
MRPL4	-0.284895	3.18483	-3.26541	0.00266644	0.0249629	-1.79121
KYAT1	-0.438434	2.83145	-3.26506	0.00266888	0.0249629	-1.79204
AVIL	0.599206	2.41301	3.26216	0.00268919	0.0250979	-1.79903
GPR65	0.763067	2.06874	3.26169	0.00269251	0.0250979	-1.80016
RECK	0.406664	2.47454	3.25956	0.00270759	0.0251954	-1.8053
MFNG	0.443149	2.9845	3.25778	0.00272018	0.0252694	-1.80957
DCP2	0.357162	2.71202	3.256	0.00273288	0.0253442	-1.81386
WASF2	0.329282	3.23253	3.25526	0.0027382	0.0253504	-1.81565
IFT88	0.350957	2.69517	3.25024	0.00277436	0.0256417	-1.82772
NDUFB1	-0.325195	4.23851	-3.24216	0.00283355	0.0261056	-1.84715
DEXI	-0.395984	3.41586	-3.24209	0.00283413	0.0261056	-1.84734
KIAA0895	-0.625165	1.55993	-3.2405	0.0028459	0.0261698	-1.85115
FOXK2	-0.323438	2.79957	-3.23949	0.00285343	0.0261948	-1.85358
PMF1	-0.485933	2.81045	-3.23767	0.00286696	0.0262749	-1.85793
PTK2	-0.361063	2.92538	-3.23021	0.0029234	0.0267471	-1.87586
AASS	-0.502328	2.15495	-3.22865	0.00293526	0.0268107	-1.87959
C1QTNF1	-0.765411	3.16186	-3.21899	0.00301014	0.0274487	-1.90275
CILP	0.928728	3.37139	3.21563	0.00303656	0.0276433	-1.91078
PHIP	0.273849	3.14593	3.21325	0.00305548	0.0277692	-1.91649
DCLRE1C	0.380078	2.61099	3.2111	0.00307257	0.027826	-1.92161
HUS1	-0.390136	1.98307	-3.21023	0.00307958	0.027826	-1.92371
ACOX1	-0.374139	2.55204	-3.2098	0.00308305	0.027826	-1.92474
CCNH	-0.33229	3.09649	-3.20944	0.00308595	0.027826	-1.92561
MTMR11	0.522327	2.86646	3.20927	0.00308725	0.027826	-1.92599
CENPC	0.338923	2.38669	3.20725	0.00310354	0.0278558	-1.93083
LBHD1	-0.271518	2.56518	-3.20718	0.00310413	0.0278558	-1.93101
PDIA3	0.32006	3.11245	3.20696	0.00310587	0.0278558	-1.93152
MS4A6A	0.964101	3.11071	3.20611	0.00311275	0.0278716	-1.93355
SART3	0.190104	2.76391	3.20228	0.0031439	0.0281044	-1.9427
HILPDA	-0.439953	2.27862	-3.20094	0.0031549	0.0281566	-1.94591
SUPT16H	0.364301	3.00812	3.1985	0.003175	0.0282251	-1.95174
PCCB	0.354622	3.272	3.19843	0.00317554	0.0282251	-1.9519
SERPINB1	-0.539188	2.61603	-3.19812	0.00317811	0.0282251	-1.95264
DYNC1LI2	0.32267	3.32795	3.19644	0.00319199	0.0283023	-1.95665
APBB1	-0.415032	2.91092	-3.19566	0.0031985	0.028314	-1.95852
NDUFAB1	-0.407396	4.26769	-3.19377	0.00321427	0.0284075	-1.96304
PRKRA	-0.377268	3.21052	-3.19136	0.0032344	0.028536	-1.96877
CEBPG	-0.344839	2.15433	-3.19063	0.00324052	0.028536	-1.97051
TPR	0.299385	3.17773	3.18961	0.00324912	0.028536	-1.97294
GTPBP3	0.308687	2.62063	3.18954	0.00324975	0.028536	-1.97312
CPSF4	-0.309811	2.93025	-3.18701	0.00327112	0.0286775	-1.97914
ATP11A	-0.408948	1.66828	-3.18187	0.00331509	0.0290164	-1.9914
SPRED2	0.444099	2.68301	3.17756	0.00335236	0.0292657	-2.00166
SLC9A6	-0.244753	3.12006	-3.17733	0.00335432	0.0292657	-2.00219
CLCN3	-0.393701	2.99345	-3.17286	0.00339344	0.0295152	-2.01284
SAMM50	-0.440038	3.22987	-3.17138	0.00340643	0.0295152	-2.01634
ZKSCAN1	0.280924	2.61498	3.17109	0.003409	0.0295152	-2.01704
PODXL	-0.398369	3.00051	-3.17098	0.00340996	0.0295152	-2.01729
PRKACB	0.461715	3.03935	3.17098	0.00340997	0.0295152	-2.0173
FGL2	1.07945	2.90089	3.17031	0.00341595	0.0295201	-2.0189
OSBPL2	0.211751	2.59388	3.16512	0.0034621	0.0298716	-2.03122
MTMR2	-0.223912	2.19177	-3.16444	0.00346827	0.0298776	-2.03285
CHGB	-0.727136	2.49564	-3.16339	0.00347771	0.0299116	-2.03534
TMEM135	0.395701	2.39111	3.16247	0.00348595	0.0299352	-2.03752
DNAJC4	-0.277081	2.44755	-3.15784	0.00352802	0.0302285	-2.04852
PSMD13	-0.234189	2.50769	-3.15672	0.00353821	0.0302285	-2.05117
ATP5F1C	-0.393639	3.83994	-3.15645	0.00354071	0.0302285	-2.05181
FLRT2	0.892003	2.36086	3.15628	0.00354228	0.0302285	-2.05222
THAP4	-0.435941	2.91614	-3.15553	0.0035491	0.0302394	-2.05398
MPPE1	0.265382	3.24042	3.15204	0.00358126	0.0304211	-2.06226
NDUFB11	-0.449436	3.71141	-3.15196	0.00358199	0.0304211	-2.06244
REEP1	0.388656	3.06822	3.15141	0.00358716	0.0304211	-2.06377
ADGRA2	0.393004	2.64007	3.14828	0.00361628	0.0306204	-2.07118
PSMG2	0.264433	2.9488	3.14593	0.00363829	0.0307245	-2.07674
CAT	0.433113	3.57459	3.14576	0.00363984	0.0307245	-2.07714
ADCY7	0.773717	2.44585	3.14463	0.00365055	0.0307673	-2.07983
TMEM204	0.36432	3.1831	3.14228	0.00367276	0.0309067	-2.08539
SNRPB	-0.438006	2.85952	-3.14097	0.00368514	0.030919	-2.08848
FAM13A	0.528328	2.83621	3.14093	0.00368555	0.030919	-2.08858
GOT1	-0.481576	4.08849	-3.13959	0.00369829	0.0309782	-2.09174
SGSM3	-0.29298	2.75954	-3.13895	0.00370446	0.0309822	-2.09327
ENOX1	0.51188	1.98429	3.13758	0.00371753	0.0310439	-2.0965
GCAT	-0.615677	2.94663	-3.1365	0.00372794	0.0310833	-2.09906
NAP1L4	0.271621	3.37954	3.13535	0.00373899	0.0311094	-2.10177
TMEM184C	-0.248491	2.55549	-3.13499	0.00374248	0.0311094	-2.10263
CIAPIN1	-0.29334	2.98961	-3.13335	0.00375832	0.0311935	-2.1065
MRC2	0.479078	3.01334	3.13091	0.0037821	0.0313431	-2.11228
ANP32A	0.230256	2.79654	3.12903	0.00380043	0.0314473	-2.11671
MATN2	0.73296	3.0991	3.12691	0.00382128	0.0315407	-2.12172
GDE1	-0.329492	3.27224	-3.1267	0.00382329	0.0315407	-2.1222
NOP10	-0.231498	3.44558	-3.12422	0.00384785	0.0316954	-2.12807
ANP32B	0.30498	3.40173	3.12293	0.00386062	0.0317526	-2.1311
GSK3A	-0.263761	3.00132	-3.12174	0.00387249	0.0318023	-2.13392
ZNF395	-0.404534	2.78606	-3.11869	0.00390298	0.0320045	-2.1411
CDH11	0.372523	2.80033	3.11676	0.00392241	0.0321155	-2.14565
RAB8A	0.384572	2.7333	3.11591	0.00393102	0.0321377	-2.14765
N4BP2L1	0.421614	2.66308	3.11485	0.00394181	0.0321777	-2.15017
XPO4	0.44907	2.50101	3.11419	0.00394848	0.0321839	-2.15171
SH3BGRL	0.442799	2.92887	3.1106	0.00398512	0.0324341	-2.16017
DMTF1	0.32478	2.92996	3.10848	0.00400685	0.0325616	-2.16515
RPL32	0.235373	4.04803	3.10791	0.00401273	0.0325616	-2.16649
TRIP12	0.302701	3.35128	3.10661	0.0040262	0.0326108	-2.16956
JAK2	0.714919	2.48906	3.10617	0.00403075	0.0326108	-2.17059
ARHGEF18	0.3233	2.73605	3.10486	0.00404433	0.0326357	-2.17367
NGLY1	-0.210233	2.8544	-3.10425	0.00405069	0.0326357	-2.17511
KAT2A	0.454801	3.0298	3.10415	0.00405178	0.0326357	-2.17536
ANKRD49	0.309073	2.89476	3.10305	0.00406325	0.0326789	-2.17795
MRPL3	-0.227316	2.94851	-3.10248	0.00406913	0.0326789	-2.17927
ZNF217	0.382114	2.121	3.09888	0.00410696	0.0329342	-2.18774
MSH6	-0.289812	2.36775	-3.09673	0.00412973	0.0330681	-2.1928
EBP	-0.504996	2.51052	-3.09582	0.00413934	0.0330965	-2.19492
SNRPC	-0.523616	3.00795	-3.09413	0.00415731	0.0331093	-2.19889
VAV3	0.54017	2.55658	3.09399	0.00415882	0.0331093	-2.19922
ADPGK	0.40178	2.98332	3.09373	0.0041616	0.0331093	-2.19983
CUL4B	0.228943	2.63689	3.09339	0.00416523	0.0331093	-2.20063
RPL28	0.306885	3.69421	3.09217	0.00417829	0.0331648	-2.2035
NDUFA6	-0.422324	3.84677	-3.09097	0.00419123	0.0332192	-2.20632
KLHL21	-0.409554	2.70124	-3.089	0.00421239	0.0333384	-2.21093
HSPA5	0.364892	3.79352	3.08792	0.00422413	0.0333829	-2.21348
TUBG1	-0.296793	2.88872	-3.08687	0.00423553	0.0334245	-2.21594
SOS2	0.230135	2.80728	3.08439	0.00426249	0.0335464	-2.22175
NT5DC2	-0.716103	2.92283	-3.08432	0.00426327	0.0335464	-2.22191
PDE4D	-0.416139	2.2977	-3.08255	0.00428271	0.0335529	-2.22607
STIM1	0.32067	2.77855	3.0825	0.0042832	0.0335529	-2.22618
MLLT3	0.336698	2.33497	3.08226	0.00428583	0.0335529	-2.22674
DHX40	0.286588	2.67441	3.082	0.00428872	0.0335529	-2.22736
FGF12	-0.647823	3.10083	-3.08075	0.0043025	0.0336012	-2.23029
RORA	0.375875	2.24793	3.08004	0.00431027	0.0336012	-2.23194
ASNS	0.472695	2.23116	3.07945	0.00431681	0.0336012	-2.23333
OASL	0.776493	2.45211	3.0792	0.00431954	0.0336012	-2.23391
TCTN3	0.282437	3.14557	3.07835	0.00432895	0.0336126	-2.2359
REV1	-0.44629	2.93926	-3.07796	0.00433333	0.0336126	-2.23682
ADCY9	-0.381057	3.12035	-3.07629	0.0043519	0.0336829	-2.24073
KCNJ8	-0.593291	3.31194	-3.07603	0.00435475	0.0336829	-2.24133
TMEM165	-0.322678	2.59217	-3.07486	0.0043679	0.0337368	-2.24409
AHDC1	-0.257834	2.83118	-3.07225	0.00439709	0.0339142	-2.25018
C14ORF132	0.740939	2.85857	3.07158	0.00440472	0.033925	-2.25176
NR4A2	-1.20171	2.50687	-3.06655	0.00446173	0.0342858	-2.26352
NDUFB3	-0.265229	4.08609	-3.06634	0.00446413	0.0342858	-2.26401
SEPTIN7	0.215996	3.16136	3.06524	0.00447675	0.0343343	-2.26659
PLAU	-0.651213	2.8875	-3.06315	0.00450075	0.0344596	-2.27147
PNMA1	0.30524	2.8183	3.06252	0.00450793	0.0344596	-2.27293
LETMD1	0.276075	2.75848	3.06216	0.00451204	0.0344596	-2.27376
DSC2	-0.410603	2.24592	-3.06092	0.0045264	0.0345209	-2.27667
ELF1	0.346173	3.02753	3.05601	0.00458354	0.0349079	-2.28813
ADCY1	-0.333939	2.40067	-3.05513	0.0045939	0.0349295	-2.29019
IL16	0.49935	2.63987	3.05468	0.00459919	0.0349295	-2.29124
TCOF1	-0.278812	2.34235	-3.05178	0.00463333	0.0351398	-2.298
TIMM8A	-0.317413	2.12669	-3.05106	0.00464189	0.0351559	-2.29969
FAM3A	-0.311684	2.79694	-3.0501	0.00465328	0.0351933	-2.30192
PROSER1	-0.318483	2.47962	-3.04931	0.00466259	0.0352148	-2.30375
PPP1R14B	-0.359018	3.07024	-3.04751	0.00468415	0.0352862	-2.30796
GLRX2	-0.343748	3.10376	-3.04744	0.00468499	0.0352862	-2.30813
KDM4B	-0.258094	2.7842	-3.04503	0.00471377	0.0354541	-2.31372
TCEA1	0.210661	2.99777	3.04351	0.00473218	0.0354978	-2.31728
TRPS1	0.443393	2.44889	3.04347	0.00473261	0.0354978	-2.31736
UBE3B	-0.284077	2.70067	-3.04284	0.0047402	0.0355059	-2.31883
LSM2	-0.20458	2.5441	-3.04216	0.0047484	0.0355185	-2.3204
ZNF337	0.281963	2.60374	3.04122	0.00475981	0.0355551	-2.3226
CYSLTR1	0.475621	1.79661	3.03849	0.00479302	0.0357108	-2.32894
STAT1	0.861698	3.27397	3.03843	0.00479375	0.0357108	-2.32908
CACNB2	-0.615733	2.84486	-3.03617	0.00482146	0.0358638	-2.33435
RPAP3	-0.205903	2.2935	-3.03569	0.00482744	0.0358638	-2.33548
F3	0.574569	2.8889	3.0305	0.00489157	0.0362908	-2.34752
PSMB6	-0.257203	3.40554	-3.02952	0.00490378	0.036332	-2.3498
MTA1	-0.26057	2.97349	-3.02771	0.00492645	0.0364504	-2.35401
UQCRFS1	-0.3056	4.14852	-3.02348	0.00497974	0.0367947	-2.36382
SART1	0.273647	2.64328	3.02201	0.00499847	0.0368557	-2.36725
TMOD1	-0.337354	3.59169	-3.02177	0.0050015	0.0368557	-2.3678
PPP3CC	-0.377412	2.55344	-3.0189	0.0050381	0.0370752	-2.37445
ESRRG	-0.484289	2.69187	-3.0147	0.00509219	0.0374055	-2.38419
PTCH1	0.326046	2.42116	3.01433	0.0050969	0.0374055	-2.38504
UBE2B	-0.228936	2.78556	-3.01382	0.00510355	0.0374055	-2.38623
AP5S1	-0.284443	2.74339	-3.00976	0.00515647	0.0377015	-2.39563
PACS2	-0.373314	3.05452	-3.00966	0.00515777	0.0377015	-2.39586
U2SURP	0.230018	2.63863	3.00733	0.00518831	0.037874	-2.40125
SMARCA2	0.32575	2.97154	3.00288	0.00524719	0.0382526	-2.41153
EMC6	-0.274585	2.98696	-3.00154	0.00526504	0.0383013	-2.41463
ETS2	-0.533047	2.48344	-3.00133	0.00526792	0.0383013	-2.41513
ZBTB20	0.263495	3.12716	2.99706	0.00532527	0.038626	-2.425
AACS	-0.449558	2.93845	-2.99695	0.00532674	0.038626	-2.42525
NARS2	-0.301158	2.84811	-2.99454	0.00535939	0.0387858	-2.43082
PAFAH2	0.368429	2.49346	2.99427	0.00536301	0.0387858	-2.43143
MED7	-0.228125	2.33271	-2.99138	0.00540236	0.0390187	-2.43809
AK6	-0.346301	2.8051	-2.98818	0.00544636	0.0392564	-2.44548
PLCE1	0.57375	2.45677	2.98758	0.00545467	0.0392564	-2.44687
XPO6	0.234159	2.97035	2.98729	0.00545859	0.0392564	-2.44753
JUP	-0.532999	3.52242	-2.9864	0.00547087	0.0392564	-2.44957
SCN7A	0.492183	2.25233	2.98638	0.00547128	0.0392564	-2.44964
UBTF	0.424776	2.76638	2.98575	0.00547996	0.0392671	-2.45109
BCKDHB	-0.386747	2.60145	-2.98422	0.00550124	0.0393499	-2.45462
ITCH	-0.254102	2.6384	-2.98388	0.00550596	0.0393499	-2.4554
AOPEP	-0.351038	3.45212	-2.98226	0.00552855	0.0393912	-2.45913
FSTL1	0.341333	3.18929	2.98221	0.00552925	0.0393912	-2.45924
TPD52	-0.35758	2.23985	-2.98191	0.00553341	0.0393912	-2.45993
UXS1	-0.237984	3.06519	-2.98059	0.00555193	0.0394166	-2.46297
ATP7B	0.373355	2.63078	2.98042	0.00555438	0.0394166	-2.46337
ATP6AP2	0.350628	3.15955	2.98011	0.00555866	0.0394166	-2.46407
PSMA2	-0.266874	2.54881	-2.97896	0.0055749	0.0394804	-2.46673
CDC34	-0.255572	2.94002	-2.9775	0.00559546	0.0395398	-2.47008
P4HA2	0.363678	3.26479	2.97734	0.00559778	0.0395398	-2.47046
SEC23A	-0.312833	2.79469	-2.97557	0.00562278	0.0396649	-2.47452
WFDC2	-0.570118	2.72955	-2.97443	0.00563903	0.0396945	-2.47715
TRMT61A	-0.222376	2.72394	-2.97426	0.00564153	0.0396945	-2.47755
CTNNA1	-0.265368	3.38009	-2.97348	0.00565263	0.0397214	-2.47934
ZC3H4	0.222248	2.87861	2.97254	0.00566603	0.0397643	-2.48149
CXCL2	-0.915266	2.73227	-2.96801	0.00573127	0.0401704	-2.49191
MYH11	0.456778	3.13809	2.96725	0.00574222	0.0401955	-2.49365
PRKCA	0.348212	2.99642	2.96635	0.00575522	0.0402075	-2.49571
WWP2	0.220382	2.73648	2.96578	0.0057636	0.0402075	-2.49703
HLA-F	0.564343	2.93616	2.96561	0.00576605	0.0402075	-2.49742
WBP4	-0.341454	2.60589	-2.96411	0.0057879	0.0402915	-2.50086
BCHE	-0.662565	2.28472	-2.96377	0.00579287	0.0402915	-2.50164
APIP	-0.25554	2.65194	-2.96021	0.00584518	0.0406036	-2.50983
GPR107	0.187636	2.94961	2.95921	0.00585984	0.0406536	-2.5121
FARS2	-0.203298	2.67681	-2.95854	0.00586975	0.0406571	-2.51364
FGD2	0.469459	2.09359	2.95802	0.0058775	0.0406571	-2.51484
DUSP14	-0.365075	2.78995	-2.95767	0.00588272	0.0406571	-2.51565
KCNAB1	0.349238	2.48647	2.9564	0.00590147	0.0407128	-2.51854
IGF2R	-0.291433	2.7676	-2.95605	0.0059068	0.0407128	-2.51937
SOCS2	0.483116	2.56456	2.95562	0.00591317	0.0407128	-2.52035
SERPINB6	-0.252792	3.48775	-2.95397	0.0059378	0.0408308	-2.52413
NDST1	-0.269614	2.84068	-2.94951	0.0060049	0.0412402	-2.53435
SDAD1	0.205022	3.16252	2.94421	0.00608548	0.0417411	-2.54647
NDUFV2	-0.281659	3.46438	-2.94289	0.00610567	0.0418269	-2.54948
MIEF1	-0.218642	2.79801	-2.94138	0.00612897	0.0419339	-2.55294
SSBP1	-0.259455	2.39995	-2.94053	0.00614198	0.0419702	-2.55487
ATP1B3	-0.704466	3.01446	-2.93998	0.00615053	0.041976	-2.55614
MRAS	-0.368016	3.08694	-2.93787	0.00618333	0.0421049	-2.56097
TMX4	-0.293207	3.38459	-2.93777	0.00618486	0.0421049	-2.5612
MT1F	0.671318	2.88464	2.93472	0.00623247	0.0423761	-2.56817
KIT	0.403386	2.53637	2.93353	0.006251	0.0424492	-2.57086
AQP3	-0.729205	1.95714	-2.93273	0.00626367	0.0424552	-2.5727
KATNB1	-0.261082	2.95477	-2.93203	0.00627468	0.0424552	-2.5743
SLC39A7	-0.279458	2.87392	-2.9316	0.00628149	0.0424552	-2.57529
DOCK9	0.348917	2.92502	2.9315	0.00628303	0.0424552	-2.57551
EIF2B5	-0.178975	2.86675	-2.93013	0.0063047	0.0425489	-2.57864
TCF12	0.273331	3.03821	2.92858	0.0063292	0.0426615	-2.58216
VCAN	0.685743	3.019	2.92605	0.00636951	0.0428297	-2.58793
VMP1	-0.352792	2.71748	-2.92549	0.00637854	0.0428297	-2.58921
SLC35A5	0.31533	2.46854	2.92516	0.00638379	0.0428297	-2.58996
NAP1L2	0.649918	2.53927	2.92505	0.00638558	0.0428297	-2.59022
PNMA8A	0.642739	2.6324	2.9243	0.00639767	0.0428581	-2.59194
PLAAT3	-0.299845	3.83375	-2.92319	0.0064154	0.0429241	-2.59445
NBN	0.352315	2.32698	2.92198	0.00643493	0.0430021	-2.59721
JAG2	-0.316767	2.97364	-2.92081	0.00645388	0.0430759	-2.59988
HMCES	-0.256438	2.70159	-2.91945	0.00647595	0.043128	-2.60298
SEPHS1	-0.198003	2.66712	-2.91917	0.00648039	0.043128	-2.6036
PIPOX	-0.407201	1.81906	-2.91886	0.00648541	0.043128	-2.60431
UGCG	-0.457005	2.32402	-2.91589	0.00653401	0.0433982	-2.61109
GCC2	0.275769	2.73449	2.9149	0.00655023	0.0434531	-2.61334
PLLP	-0.364008	2.47806	-2.9142	0.00656167	0.0434742	-2.61492
WIPI2	0.218665	3.20135	2.91373	0.00656936	0.0434742	-2.61599
FMO2	0.555519	2.89963	2.91218	0.00659488	0.0435902	-2.61951
MYBL1	0.464176	2.23324	2.91126	0.00661014	0.0436381	-2.6216
LUC7L3	0.280923	2.99734	2.90966	0.00663673	0.0437319	-2.62525
FLII	-0.328222	3.05155	-2.90944	0.00664039	0.0437319	-2.62575
FKTN	0.342467	2.423	2.90861	0.00665413	0.0437695	-2.62762
DYNLT1	0.318971	3.59058	2.90451	0.00672276	0.0440825	-2.63694
ACSS3	-0.321158	2.65544	-2.9045	0.00672298	0.0440825	-2.63697
IGF1	0.648422	3.03027	2.90391	0.0067329	0.0440825	-2.63831
PLK2	-0.594603	2.83011	-2.90384	0.00673404	0.0440825	-2.63846
HLA-DRA	1.0086	4.04134	2.90233	0.00675956	0.0441965	-2.64189
PUS3	-0.293665	2.61021	-2.90123	0.00677814	0.0442649	-2.64438
TFDP1	-0.220424	2.63739	-2.89601	0.00686711	0.0447923	-2.65622
RBMS2	-0.37802	2.26424	-2.89295	0.00691983	0.0450822	-2.66315
KCNAB2	0.417654	2.97517	2.88794	0.00700704	0.0455959	-2.67451
FBN1	0.686172	3.5761	2.88429	0.007071	0.0459573	-2.68275
COL8A1	0.578572	1.78395	2.88301	0.00709366	0.0460497	-2.68565
PHKA2	-0.254577	2.69043	-2.88152	0.00712009	0.0461663	-2.68902
NCF2	0.691944	2.64584	2.87899	0.00716515	0.0463377	-2.69474
HAT1	-0.257892	2.18033	-2.87868	0.00717059	0.0463377	-2.69543
TIMM44	-0.335051	2.54463	-2.87783	0.00718589	0.0463377	-2.69736
SSTR2	-0.579201	2.29363	-2.87766	0.00718898	0.0463377	-2.69775
STXBP6	-0.405068	1.85397	-2.87663	0.00720747	0.0463377	-2.70008
PARP6	-0.255083	2.94812	-2.87653	0.00720912	0.0463377	-2.70029
BAMBI	0.390969	2.72695	2.87637	0.00721209	0.0463377	-2.70066
RNF122	-0.705898	3.16812	-2.87623	0.00721451	0.0463377	-2.70096
FAM216A	0.353259	2.53312	2.87491	0.00723839	0.0464364	-2.70396
CEP350	0.261853	2.55189	2.87333	0.00726684	0.0465391	-2.70751
MEF2C	0.240979	3.13184	2.87308	0.00727146	0.0465391	-2.70809
HLA-DMB	0.765044	3.12082	2.87168	0.00729674	0.0466461	-2.71123
PYROXD1	0.224417	3.02353	2.87095	0.00731006	0.0466698	-2.71289
BAHD1	-0.193491	2.85055	-2.8699	0.00732919	0.0466698	-2.71526
USP46	0.356023	2.78334	2.86978	0.00733148	0.0466698	-2.71554
UBE2G2	-0.225535	3.35334	-2.86923	0.00734147	0.0466698	-2.71677
ZBTB16	0.802679	3.2755	2.86913	0.00734324	0.0466698	-2.71699
SPTAN1	0.356396	3.47383	2.86824	0.00735952	0.0467188	-2.719
GLRX3	-0.302416	3.19484	-2.86609	0.00739904	0.0468841	-2.72385
MRPL39	-0.245441	2.87102	-2.86589	0.00740275	0.0468841	-2.7243
LGR4	-0.344258	2.41093	-2.86529	0.00741384	0.0468998	-2.72566
NUCB2	0.276313	2.97968	2.86374	0.00744232	0.0470255	-2.72913
NPAS2	-0.599097	2.60357	-2.8631	0.00745425	0.0470464	-2.73058
NRDC	-0.265374	3.40552	-2.86219	0.00747106	0.0470631	-2.73262
MLYCD	0.457462	4.24131	2.86203	0.00747417	0.0470631	-2.733
MOCS2	-0.302833	3.1821	-2.86091	0.00749488	0.0471391	-2.73551
HPS5	0.257189	2.20322	2.86017	0.00750868	0.0471417	-2.73717
THBS4	0.975031	4.02209	2.85996	0.00751258	0.0471417	-2.73764
BTG1	0.377137	3.32094	2.85914	0.00752806	0.0471431	-2.73951
RIN2	0.307184	3.38065	2.85903	0.0075301	0.0471431	-2.73975
SEL1L3	0.707387	2.51014	2.85849	0.00754008	0.0471515	-2.74095
PCYOX1	-0.394933	2.49045	-2.85759	0.00755702	0.0471682	-2.74298
RAB22A	0.271556	2.73916	2.85743	0.00756006	0.0471682	-2.74335
NR2C1	0.329751	2.68052	2.85548	0.0075968	0.0473432	-2.74774
AKTIP	-0.251603	3.34115	-2.85416	0.00762175	0.0474445	-2.75071
DPY19L1	-0.321114	2.52735	-2.85237	0.00765558	0.0476008	-2.75472
RCN3	0.540715	2.80237	2.84836	0.00773226	0.0480228	-2.76374
HAUS5	0.429299	2.81049	2.84549	0.00778747	0.0483107	-2.77018
SCAF8	0.227484	2.92762	2.84448	0.00780695	0.0483685	-2.77244
SPAG7	-0.278781	3.69755	-2.84407	0.00781486	0.0483685	-2.77335
POGZ	0.245873	2.55495	2.84363	0.00782341	0.0483685	-2.77434
SF1	0.254	3.31463	2.84282	0.00783915	0.048411	-2.77616
ADNP	0.197669	3.02474	2.84061	0.00788227	0.0485807	-2.78112
UBR2	0.239435	2.8595	2.84018	0.00789061	0.0485807	-2.78208
LIPE	-0.351686	3.04687	-2.83988	0.00789652	0.0485807	-2.78276
COL6A3	0.541081	3.78455	2.8393	0.00790788	0.0485807	-2.78406
MTUS2	-0.481329	3.40117	-2.83898	0.00791405	0.0485807	-2.78476
RNASET2	0.400729	2.85528	2.83837	0.00792605	0.0485807	-2.78613
MAN1B1	0.356197	2.50689	2.83822	0.007929	0.0485807	-2.78647
HMGB1	0.268421	3.37229	2.8371	0.00795111	0.0486615	-2.78899
NFASC	0.365876	2.47101	2.835	0.00799258	0.0488364	-2.7937
PHTF2	-0.380825	2.40686	-2.83474	0.00799759	0.0488364	-2.79426
TUSC3	-0.303609	2.97688	-2.83071	0.00807791	0.0492716	-2.8033
VGLL4	0.303609	3.01292	2.82942	0.00810368	0.0493732	-2.80618
PNKP	-0.315815	2.57986	-2.82897	0.00811267	0.0493732	-2.80718
ZNF318	-0.193587	2.54352	-2.82783	0.00813563	0.0494577	-2.80974
PLP2	-0.37193	3.26087	-2.82279	0.00823768	0.0500224	-2.82101
NCBP3	0.259148	2.63008	2.82178	0.00825831	0.0500561	-2.82327
FRMD4B	0.454487	2.48693	2.82161	0.00826159	0.0500561	-2.82363
CRIPT	-0.256543	2.21562	-2.81901	0.00831502	0.0503238	-2.82945
GMPS	-0.211576	3.07086	-2.81288	0.00844172	0.051034	-2.84312
CDK16	-0.213591	3.32732	-2.81214	0.00845722	0.0510711	-2.84477
CAMK2N1	-0.265977	3.13816	-2.81064	0.00848849	0.0511586	-2.84811
FAM50A	-0.300674	2.6859	-2.81055	0.00849046	0.0511586	-2.84832
CHD8	0.189799	3.27974	2.81004	0.00850104	0.0511657	-2.84944
PSMB5	-0.250548	3.32755	-2.80938	0.00851495	0.051193	-2.85092
YLPM1	0.24179	2.69599	2.80717	0.00856152	0.0513744	-2.85585
OAZ1	-0.229399	3.44772	-2.80705	0.00856397	0.0513744	-2.8561
PANK4	-0.272261	2.88292	-2.80512	0.00860473	0.0515622	-2.86039
SERP1	0.236669	2.92685	2.80438	0.0086206	0.0516006	-2.86206
TICAM1	-0.234038	2.06008	-2.80383	0.00863232	0.0516141	-2.86328
EHD4	-0.48575	3.35277	-2.80317	0.00864636	0.0516385	-2.86475
ACAT2	-0.286136	1.75509	-2.80274	0.00865534	0.0516385	-2.86569
RASL12	-0.523139	2.66759	-2.79887	0.00873833	0.0520546	-2.8743
STK11	-0.24832	2.8448	-2.7986	0.00874418	0.0520546	-2.87491
SREBF2	-0.287943	2.90304	-2.79756	0.00876652	0.0521024	-2.87721
CEP290	0.229906	2.30841	2.79734	0.00877133	0.0521024	-2.87771
ACKR3	-0.504732	2.96075	-2.79668	0.00878564	0.0521307	-2.87918
EIF2D	0.20674	3.16067	2.79512	0.00881943	0.0522743	-2.88264
SPAG9	-0.208925	2.28906	-2.79346	0.00885555	0.0524314	-2.88633
FBXL5	-0.289367	3.22241	-2.79213	0.00888457	0.0525462	-2.88929
PEX5	-0.343909	2.68651	-2.78929	0.00894686	0.0528572	-2.89559
BZW2	-0.289443	4.04566	-2.78792	0.00897685	0.052977	-2.89861
ENC1	0.573781	2.93708	2.78636	0.00901154	0.0531169	-2.90209
MMACHC	-0.420215	2.47702	-2.78597	0.00902004	0.0531169	-2.90294
FAXDC2	0.47427	3.15262	2.78502	0.0090412	0.053147	-2.90505
RBL2	0.248141	3.10694	2.78451	0.00905255	0.053147	-2.90619
TRIM38	0.378663	2.52642	2.78443	0.00905438	0.053147	-2.90637
PLIN2	-0.553403	3.43928	-2.78282	0.00909008	0.0532547	-2.90992
COQ7	-0.250537	2.83138	-2.78273	0.00909226	0.0532547	-2.91013
TOMM40	-0.345983	3.00227	-2.77757	0.00920807	0.0538429	-2.92155
RCC1L	-0.271278	3.15711	-2.77699	0.00922123	0.0538429	-2.92284
POLR1C	-0.26599	2.20386	-2.77662	0.00922954	0.0538429	-2.92365
STN1	-0.278861	2.92704	-2.7765	0.0092322	0.0538429	-2.92391
SSH1	-0.324138	1.78894	-2.77588	0.00924631	0.0538585	-2.92529
GATM	0.550025	2.74684	2.77547	0.00925557	0.0538585	-2.92619
BCL11A	-0.380621	2.88355	-2.77508	0.0092645	0.0538585	-2.92706
SMARCC1	0.213861	2.50978	2.77427	0.00928284	0.0539077	-2.92884
DCTPP1	-0.253741	3.21074	-2.77319	0.00930755	0.0539937	-2.93124
DLGAP4	0.340825	3.14468	2.77175	0.00934043	0.0541024	-2.93442
SLC6A1	0.52239	2.07147	2.7715	0.00934613	0.0541024	-2.93497
LSM4	-0.255845	2.71652	-2.77026	0.00937463	0.0542098	-2.93771
MAP3K7CL	0.653452	1.99454	2.76948	0.00939271	0.0542568	-2.93945
MRPL15	-0.263899	3.63306	-2.76662	0.00945861	0.0545254	-2.94575
FRAT1	0.439908	2.54636	2.76633	0.00946542	0.0545254	-2.9464
CKS1B	-0.307534	2.10277	-2.76617	0.0094692	0.0545254	-2.94676
CTSO	0.429839	3.06985	2.76369	0.00952672	0.0547603	-2.95222
RPL15	0.164857	3.4051	2.76355	0.00953009	0.0547603	-2.95253
EMC8	-0.275464	2.86624	-2.76109	0.00958769	0.0550333	-2.95796
ACADVL	-0.436645	3.7827	-2.76002	0.0096127	0.0550605	-2.96031
MYO5A	0.392946	2.33876	2.75994	0.00961454	0.0550605	-2.96048
C5	0.614372	2.11928	2.7596	0.00962272	0.0550605	-2.96125
LMCD1	-0.58692	3.1686	-2.7581	0.00965805	0.0552023	-2.96455
JCAD	0.317486	2.07837	2.75734	0.00967604	0.0552023	-2.96623
MOXD1	0.494554	2.49807	2.75726	0.00967787	0.0552023	-2.9664
PPARGC1A	-0.41625	2.89813	-2.7553	0.00972446	0.0554101	-2.97072
SDHA	-0.281373	4.141	-2.7532	0.00977442	0.0556367	-2.97534
SUSD5	0.474457	1.89148	2.75057	0.00983757	0.0559377	-2.98114
BCORL1	-0.289464	2.70518	-2.74893	0.00987698	0.0561033	-2.98474
APEX1	-0.215967	3.06133	-2.7483	0.00989225	0.0561316	-2.98613
RNF121	-0.186859	2.46809	-2.74707	0.00992186	0.0562411	-2.98882
TACC1	0.401043	2.92712	2.74578	0.0099532	0.0563187	-2.99166
HELZ	0.23808	3.21043	2.74566	0.00995621	0.0563187	-2.99193
HMG20B	-0.307049	2.59085	-2.74191	0.0100478	0.056778	-3.00017
C2CD5	0.296971	3.1282	2.7413	0.0100627	0.0568031	-3.00151
FAM20B	-0.230689	2.85202	-2.74063	0.0100792	0.0568376	-3.00298
PNRC2	0.309571	3.34475	2.73782	0.0101485	0.057116	-3.00915
USP33	0.259744	2.95889	2.73778	0.0101495	0.057116	-3.00924
TBC1D10B	-0.205782	2.99482	-2.7372	0.0101638	0.0571374	-3.0105
MAST2	-0.491164	3.00738	-2.73582	0.010198	0.0572704	-3.01352
DAZAP1	-0.30194	2.77303	-2.73471	0.0102256	0.0573488	-3.01596
HLA-DMA	0.709642	3.33736	2.73416	0.0102396	0.0573488	-3.01718
LARP4	-0.410056	2.5038	-2.734	0.0102435	0.0573488	-3.01753
RETSAT	-0.337153	2.82056	-2.7331	0.010266	0.0574156	-3.0195
NAV2	0.477421	3.09246	2.73251	0.0102806	0.0574386	-3.02078
LAPTM5	0.804033	3.28007	2.73186	0.0102971	0.0574718	-3.02222
DPYSL4	-0.603044	2.41893	-2.7312	0.0103135	0.0575046	-3.02366
ARPP19	-0.184491	3.01859	-2.72991	0.0103459	0.0576266	-3.02648
TCIM	-0.458828	2.41014	-2.72939	0.0103591	0.0576408	-3.02762
EIF2B3	-0.213256	3.02298	-2.72806	0.0103928	0.0577372	-3.03054
MRGBP	-0.340248	2.42306	-2.72779	0.0103996	0.0577372	-3.03113
RRP15	-0.255248	2.17914	-2.72745	0.0104082	0.0577372	-3.03187
ABCD3	-0.434664	3.26225	-2.72621	0.0104397	0.0578533	-3.03459
HTATIP2	-0.385429	1.89708	-2.72481	0.0104753	0.0579632	-3.03765
POMZP3	-0.547737	2.45398	-2.72439	0.0104859	0.0579632	-3.03856
LAMB1	0.277388	2.51364	2.72418	0.0104914	0.0579632	-3.03904
AIFM1	-0.251838	3.33227	-2.72224	0.0105411	0.0581785	-3.04328
ENPP4	-0.200211	2.72366	-2.72083	0.0105771	0.0583047	-3.04635
DGKD	-0.452129	3.3601	-2.72025	0.0105921	0.0583047	-3.04763
FADS1	-0.253598	3.09693	-2.7201	0.010596	0.0583047	-3.04795
PILRA	0.366678	2.10951	2.71549	0.0107155	0.0588597	-3.05803
LYPLA1	-0.27009	2.99474	-2.71514	0.0107244	0.0588597	-3.05878
ITFG1	0.251416	3.63687	2.71482	0.0107329	0.0588597	-3.05949
KCNJ2	0.588444	3.61792	2.71454	0.01074	0.0588597	-3.06009
ESD	-0.237775	3.15848	-2.71341	0.0107697	0.058963	-3.06257
RABL2A	0.263376	2.6504	2.71178	0.0108122	0.0590316	-3.06611
LTBR	-0.284166	3.00266	-2.71171	0.0108142	0.0590316	-3.06628
ENO2	0.452482	2.51739	2.71169	0.0108147	0.0590316	-3.06632
ROCK1	0.291548	3.14161	2.70992	0.0108613	0.0592266	-3.07018
PICK1	-0.188758	2.64792	-2.70916	0.0108814	0.0592771	-3.07184
SUMO3	-0.245948	3.14699	-2.70829	0.0109044	0.0593119	-3.07374
SLIT3	0.392409	2.90671	2.70791	0.0109145	0.0593119	-3.07456
METAP1	-0.256164	3.44681	-2.70768	0.0109204	0.0593119	-3.07506
THOC5	-0.263274	2.84478	-2.70627	0.0109578	0.0593599	-3.07813
GAS1	0.576064	3.07315	2.70621	0.0109594	0.0593599	-3.07826
NDUFS8	-0.381783	3.43407	-2.70568	0.0109736	0.0593599	-3.07942
ETV7	0.893312	2.85047	2.70549	0.0109786	0.0593599	-3.07983
ADGRL4	-0.367754	2.53399	-2.7053	0.0109837	0.0593599	-3.08025
FAM111A	0.482176	3.04907	2.70439	0.0110081	0.0594056	-3.08224
PFDN2	-0.228441	2.93228	-2.70417	0.011014	0.0594056	-3.08272
CEP104	-0.191766	2.32489	-2.70367	0.0110272	0.0594075	-3.08379
FBLN1	0.526526	3.37911	2.70293	0.011047	0.0594075	-3.08541
CYCS	-0.335126	4.47555	-2.70215	0.0110679	0.0594075	-3.08711
EMC7	-0.22124	2.99839	-2.70188	0.0110751	0.0594075	-3.08769
SDHB	-0.287508	3.48136	-2.70165	0.0110814	0.0594075	-3.0882
MMP9	1.0765	2.48443	2.70137	0.0110888	0.0594075	-3.0888
TBPL1	0.307902	2.75188	2.70131	0.0110906	0.0594075	-3.08894
RPS17	0.265907	3.66439	2.69987	0.0111293	0.0595564	-3.09207
GGCX	-0.200846	2.36556	-2.69407	0.0112869	0.0603404	-3.10469
PPP1R12B	-0.260098	3.52049	-2.69288	0.0113192	0.060454	-3.10726
MBTPS1	-0.334923	2.95031	-2.69241	0.0113323	0.0604647	-3.1083
KYNU	0.418492	2.65907	2.68795	0.0114551	0.0610602	-3.11797
ERCC1	-0.401978	2.9303	-2.6854	0.0115259	0.0613776	-3.1235
SMAD7	0.525469	3.03732	2.685	0.0115371	0.0613776	-3.12437
DHRS1	0.402311	3.14592	2.68088	0.0116526	0.0619316	-3.13331
HIC2	0.265469	2.39653	2.68005	0.0116758	0.0619945	-3.13509
B4GALT5	-0.295362	3.01683	-2.67939	0.0116947	0.0620341	-3.13654
EHD3	0.40532	3.3943	2.67733	0.0117529	0.0622822	-3.14099
RTN2	-0.522211	2.64163	-2.67523	0.0118125	0.0625376	-3.14553
STX10	-0.305161	2.8296	-2.67368	0.0118568	0.0626572	-3.14888
MAPKAPK5	-0.240201	2.42443	-2.67336	0.0118661	0.0626572	-3.14959
TAPBP	0.28515	3.36631	2.67324	0.0118696	0.0626572	-3.14985
PRDX1	-0.317034	3.34243	-2.67081	0.0119393	0.0629289	-3.1551
RFNG	-0.212136	2.62964	-2.67064	0.0119441	0.0629289	-3.15546
VAMP1	0.419258	2.58838	2.6698	0.0119684	0.0629368	-3.15728
EPB41L2	0.346483	3.00395	2.66979	0.0119687	0.0629368	-3.1573
MAD2L1BP	-0.270458	2.7998	-2.66699	0.0120496	0.0633013	-3.16334
CNIH4	-0.315838	2.27141	-2.66168	0.0122049	0.0640268	-3.17481
HECA	-0.282767	3.70689	-2.66146	0.0122112	0.0640268	-3.17528
PNN	0.298067	3.27695	2.65832	0.012304	0.0644514	-3.18206
HSPB1	0.333064	4.59621	2.65741	0.0123309	0.0644633	-3.18401
STK10	0.402712	2.47843	2.65727	0.012335	0.0644633	-3.18431
GSTM5	0.641902	3.37739	2.65705	0.0123418	0.0644633	-3.1848
ZNF146	-0.23291	2.56175	-2.65561	0.0123843	0.0646238	-3.18789
CSTF1	-0.224959	2.07987	-2.65405	0.0124312	0.0647926	-3.19126
PCSK5	0.292541	2.16972	2.65362	0.0124439	0.0647926	-3.19218
NKTR	0.262832	2.82354	2.65306	0.0124606	0.0647926	-3.19338
PRKAR2A	-0.24096	3.00477	-2.65281	0.0124682	0.0647926	-3.19393
PAN2	0.234335	2.59853	2.65254	0.0124761	0.0647926	-3.1945
TEX264	-0.261367	2.57292	-2.65149	0.0125077	0.0648947	-3.19676
PRPF38B	0.190687	2.29273	2.65035	0.0125419	0.0649325	-3.19921
CCND2	0.320978	3.44197	2.65028	0.0125441	0.0649325	-3.19936
UROS	-0.284373	3.0167	-2.65006	0.0125507	0.0649325	-3.19983
SNRPG	-0.28862	3.27241	-2.64959	0.0125649	0.0649442	-3.20084
MTRR	-0.197744	2.72172	-2.64823	0.012606	0.0650669	-3.20377
MRM3	-0.17563	2.63337	-2.64802	0.0126124	0.0650669	-3.20423
TEX10	-0.185678	2.53149	-2.64522	0.0126977	0.0654449	-3.21026
CGRRF1	-0.249129	2.71323	-2.64411	0.0127313	0.065556	-3.21262
ALOX5AP	0.790167	2.89666	2.64276	0.0127729	0.0656621	-3.21554
CIAO2B	-0.394071	3.35998	-2.64265	0.012776	0.0656621	-3.21576
YTHDF1	-0.201357	2.91175	-2.6387	0.0128979	0.0662166	-3.22426
WAS	0.429906	2.95046	2.63793	0.0129215	0.0662166	-3.22589
BBOF1	0.417833	2.65055	2.63773	0.0129278	0.0662166	-3.22633
EIF3E	0.311698	3.84827	2.63758	0.0129325	0.0662166	-3.22665
ZER1	-0.241137	2.76933	-2.63651	0.0129657	0.0663246	-3.22895
TPTE	-0.260314	1.86748	-2.63507	0.0130106	0.0664919	-3.23204
ASS1	-0.414979	2.95282	-2.63346	0.0130609	0.0666864	-3.23549
MGAT4C	-0.768872	1.71066	-2.63182	0.0131123	0.0668862	-3.239
ATP5PF	-0.272413	4.45638	-2.63067	0.0131485	0.0670083	-3.24147
NXT1	-0.317719	2.72968	-2.62972	0.0131784	0.0670237	-3.24349
VEGFD	-0.57477	2.66833	-2.6297	0.0131789	0.0670237	-3.24353
PRNP	-0.3404	3.33113	-2.6294	0.0131884	0.0670237	-3.24418
DOHH	-0.291419	2.72203	-2.628	0.0132327	0.0671862	-3.24717
RPL36	0.221715	3.26434	2.62579	0.0133029	0.0674799	-3.25191
SDCBP	-0.336068	3.66259	-2.62206	0.0134221	0.0679647	-3.25987
AKR1C3	-0.52652	2.28632	-2.62202	0.0134234	0.0679647	-3.25996
TRIT1	-0.242353	2.2472	-2.61835	0.0135417	0.0684894	-3.26781
IQCE	0.188773	2.47073	2.61803	0.0135522	0.0684894	-3.26849
ASAP1	0.407676	2.78813	2.61756	0.0135673	0.0685025	-3.26949
PLPP3	-0.267814	3.24029	-2.61694	0.0135875	0.0685409	-3.27082
CYREN	-0.235514	2.86904	-2.61646	0.0136029	0.0685553	-3.27184
THAP7	-0.22683	2.26597	-2.61315	0.0137109	0.0690356	-3.2789
LDHA	-0.518803	3.36606	-2.61221	0.0137418	0.0691272	-3.28091
FLOT1	-0.263676	4.02707	-2.61011	0.013811	0.0694112	-3.28539
PNMA2	0.525467	2.27833	2.60909	0.0138445	0.0695159	-3.28756
VPS37C	-0.212845	3.01972	-2.6087	0.0138573	0.0695159	-3.28838
COQ6	-0.251293	2.93691	-2.60818	0.0138745	0.069538	-3.28949
SLC35E3	0.291633	2.58215	2.60532	0.0139695	0.0699501	-3.29558
LTN1	0.235023	2.80971	2.60439	0.0140006	0.0700413	-3.29756
JUND	-0.385922	3.26136	-2.60258	0.0140609	0.0702788	-3.3014
SEMA5A	0.282911	2.96612	2.60086	0.0141187	0.0705029	-3.30506
CCT7	-0.216082	3.30846	-2.59922	0.0141741	0.0706036	-3.30856
CTNNBL1	-0.178836	2.68552	-2.59919	0.0141752	0.0706036	-3.30863
RABGEF1	-0.223443	2.7563	-2.59911	0.0141777	0.0706036	-3.30879
TBC1D1	-0.202751	3.03206	-2.59702	0.0142484	0.0708912	-3.31323
CUL1	-0.196868	2.84385	-2.59423	0.0143436	0.0712994	-3.31916
MFAP3	-0.253013	2.97912	-2.59339	0.0143721	0.0713761	-3.32094
NCAPH2	-0.205619	2.40526	-2.59175	0.0144284	0.0715905	-3.32442
ESR1	0.432113	2.47964	2.59007	0.014486	0.0716679	-3.32798
PPP3CB	-0.187555	2.92163	-2.58981	0.0144949	0.0716679	-3.32853
IER3IP1	-0.215728	2.52989	-2.58978	0.014496	0.0716679	-3.32859
PALLD	-0.353887	3.91852	-2.58977	0.0144966	0.0716679	-3.32863
FZD7	0.367856	2.84904	2.58675	0.0146009	0.0721184	-3.33502
RYR3	0.589094	2.24187	2.58489	0.0146657	0.0723508	-3.33897
APRT	-0.277723	2.56166	-2.58463	0.0146745	0.0723508	-3.33951
ZNF516	-0.280869	2.22703	-2.58196	0.014768	0.072746	-3.34517
AP3D1	-0.183206	3.30783	-2.5815	0.014784	0.0727474	-3.34614
TXNRD1	-0.362071	3.27238	-2.58119	0.014795	0.0727474	-3.34679
ISOC1	-0.314913	3.46155	-2.57972	0.0148467	0.0729362	-3.34991
DIXDC1	0.427542	2.81978	2.57911	0.0148683	0.0729765	-3.3512
ZNF764	-0.330119	2.43239	-2.57553	0.0149951	0.0735325	-3.35877
HOMER1	-0.346769	3.25961	-2.57508	0.0150109	0.0735439	-3.35971
SRI	0.312487	2.64383	2.57337	0.0150719	0.0737764	-3.36332
PHF11	0.291265	3.28836	2.57237	0.0151078	0.0738861	-3.36544
SCMH1	-0.257873	2.95662	-2.56907	0.0152263	0.0743989	-3.3724
SLC9A3R2	-0.501068	2.63233	-2.56821	0.0152575	0.0744845	-3.37422
ACSM3	0.64841	2.45026	2.56772	0.0152751	0.0745037	-3.37525
CASP1	0.456778	2.41932	2.56709	0.0152981	0.074549	-3.37659
KMT5B	0.228385	2.64938	2.56626	0.0153282	0.0745762	-3.37834
MRPS33	-0.198024	3.47602	-2.56594	0.0153397	0.0745762	-3.37901
HLA-G	0.448243	3.56979	2.56554	0.0153541	0.0745762	-3.37985
CD55	-0.327049	2.92424	-2.56543	0.0153583	0.0745762	-3.38009
BCL2	0.45144	2.7692	2.5642	0.0154029	0.074726	-3.38267
SNF8	-0.317701	2.5237	-2.56264	0.0154597	0.074935	-3.38595
HAGH	-0.261887	3.31727	-2.56199	0.0154839	0.0749521	-3.38734
DENR	0.269364	2.80113	2.56157	0.015499	0.0749521	-3.38821
TIMM9	-0.173098	2.64158	-2.56142	0.0155045	0.0749521	-3.38852
IQGAP2	-0.371224	2.56355	-2.56088	0.0155244	0.0749821	-3.38967
STS	0.384703	2.78309	2.55984	0.0155626	0.0750999	-3.39185
CTDSP1	0.200279	3.63051	2.55861	0.0156078	0.0752515	-3.39443
RANBP9	-0.17972	3.11654	-2.55748	0.0156496	0.0753864	-3.39681
TYROBP	0.694966	2.91465	2.55565	0.0157175	0.0755607	-3.40067
PAK4	-0.200366	2.7341	-2.55545	0.0157249	0.0755607	-3.40109
MAFB	0.702808	3.06497	2.55518	0.015735	0.0755607	-3.40166
CTNNBIP1	-0.228437	3.14811	-2.5548	0.015749	0.0755607	-3.40245
PA2G4	-0.20133	2.53147	-2.55464	0.0157551	0.0755607	-3.40279
RPL35	0.189613	3.8659	2.55425	0.0157695	0.0755634	-3.40361
TSC22D1	-0.386865	3.82876	-2.55283	0.0158225	0.0757509	-3.40659
LTBP4	0.284624	2.91266	2.55155	0.0158706	0.0758514	-3.40929
NEDD8	-0.213594	3.04257	-2.55153	0.0158714	0.0758514	-3.40933
NPDC1	0.26769	3.26308	2.54994	0.0159309	0.0760694	-3.41267
NIPSNAP2	-0.235056	3.81985	-2.54762	0.0160184	0.0762967	-3.41754
TBK1	0.215935	2.91712	2.54751	0.0160224	0.0762967	-3.41776
KANK1	0.283481	3.85849	2.54729	0.0160307	0.0762967	-3.41822
CTH	-0.347226	1.65686	-2.54719	0.0160345	0.0762967	-3.41843
TMEM177	-0.309054	2.27395	-2.5458	0.0160873	0.0764815	-3.42136
HEBP1	-0.319241	3.14354	-2.54401	0.0161554	0.0767317	-3.42511
CHN1	0.334009	3.01911	2.54368	0.0161681	0.0767317	-3.42581
AK1	-0.380808	4.18475	-2.54312	0.0161893	0.0767654	-3.42697
DTNA	-0.310737	2.97466	-2.54051	0.0162894	0.0771728	-3.43245
JADE3	-0.377162	2.34775	-2.53914	0.0163417	0.0773537	-3.4353
CLIP1	-0.23593	3.04868	-2.53694	0.0164268	0.0776889	-3.43992
NBEAL1	0.260121	4.05257	2.53499	0.0165023	0.0779783	-3.44399
THUMPD1	0.265676	2.25638	2.53345	0.0165624	0.0781072	-3.44723
SLC35E1	-0.160894	2.54849	-2.53337	0.0165654	0.0781072	-3.44739
ATF5	0.261676	3.05082	2.53287	0.0165847	0.0781072	-3.44842
SVIL	0.299456	3.89797	2.53282	0.0165869	0.0781072	-3.44854
C1S	0.59758	3.5883	2.5316	0.0166344	0.0782155	-3.45108
TMED1	-0.293375	3.22239	-2.5315	0.0166385	0.0782155	-3.4513
SND1	-0.266836	3.19276	-2.53022	0.0166887	0.0783836	-3.45397
ECI1	-0.295971	3.06091	-2.52731	0.0168033	0.0788025	-3.46005
MED22	-0.149696	2.42132	-2.52658	0.016832	0.0788025	-3.46157
CDH10	-0.51068	2.26528	-2.52657	0.0168323	0.0788025	-3.46158
OSBPL9	0.24677	3.29343	2.52649	0.0168357	0.0788025	-3.46176
CENPU	0.520027	2.17202	2.52339	0.0169586	0.0793098	-3.46822
NR4A1	-1.1588	3.2584	-2.52272	0.0169853	0.0793665	-3.46962
EXTL3	-0.250363	2.60339	-2.5212	0.017046	0.0795821	-3.47279
NET1	0.276219	2.65229	2.51643	0.0172379	0.080409	-3.48272
NSL1	0.255414	2.23509	2.51591	0.017259	0.0804388	-3.48381
LPAR3	-0.557249	2.52822	-2.51519	0.0172882	0.080506	-3.48531
HCFC1R1	-0.271252	3.14384	-2.51442	0.0173193	0.0805701	-3.48691
HDGF	-0.478288	3.24032	-2.51412	0.0173315	0.0805701	-3.48753
ZBTB18	-0.558691	2.48681	-2.51325	0.0173669	0.080666	-3.48934
OFD1	0.241569	2.85199	2.50848	0.0175621	0.0815032	-3.49926
COTL1	0.595863	1.99424	2.50727	0.0176121	0.0816526	-3.50178
HERC5	0.34219	2.45162	2.50698	0.0176243	0.0816526	-3.50239
ISYNA1	-0.422778	2.60309	-2.50553	0.0176842	0.0818608	-3.5054
RMND5B	-0.225893	2.83345	-2.50246	0.0178114	0.0823794	-3.51175
VDAC2	-0.225813	4.07602	-2.50105	0.0178703	0.0825819	-3.51468
KIAA1109	0.236925	2.72688	2.50062	0.0178883	0.0825952	-3.51558
B4GALT3	-0.197246	2.81479	-2.49968	0.0179276	0.0827064	-3.51752
RRAS2	0.61303	2.93576	2.49835	0.0179836	0.0828499	-3.52029
GALNT10	0.272107	2.51604	2.49822	0.017989	0.0828499	-3.52055
PERP	-0.319209	2.91831	-2.49744	0.0180219	0.0829313	-3.52217
GNPAT	-0.179291	3.44543	-2.49694	0.0180429	0.0829579	-3.5232
SORBS2	0.29429	4.08268	2.49629	0.0180703	0.0830138	-3.52455
TTLL5	-0.175535	2.29129	-2.49553	0.0181023	0.0830906	-3.52611
CROT	0.299369	2.9874	2.49256	0.0182286	0.0836002	-3.53228
POLR2I	-0.292524	3.44696	-2.4844	0.0185789	0.0851336	-3.54914
NDRG2	-0.265519	3.76394	-2.48403	0.0185948	0.0851336	-3.5499
TNFRSF9	0.402165	2.19718	2.48369	0.0186098	0.0851336	-3.55061
MPST	-0.330317	2.87774	-2.48045	0.0187506	0.085706	-3.55728
TLK2	0.192688	2.72109	2.47963	0.0187865	0.08578	-3.55898
YTHDC1	0.312505	2.52098	2.47936	0.0187983	0.08578	-3.55953
MUL1	-0.193806	3.14688	-2.47843	0.0188389	0.0858537	-3.56144
LRRC2	-0.419964	3.28981	-2.47828	0.0188459	0.0858537	-3.56177
GTF2E1	0.198545	2.59179	2.47715	0.0188952	0.0859492	-3.56408
ICMT	-0.60934	2.96665	-2.47708	0.0188984	0.0859492	-3.56423
ERI2	0.328365	2.13446	2.47652	0.0189229	0.0859798	-3.56538
RPL13A	0.213965	4.41947	2.47621	0.0189367	0.0859798	-3.56602
PALM	-0.291611	3.01272	-2.47478	0.0190001	0.0861959	-3.56898
C1QB	0.821161	3.49127	2.47343	0.0190595	0.0863936	-3.57174
PXMP4	0.227427	2.85283	2.47298	0.0190794	0.0864121	-3.57267
BCAP29	-0.267146	2.61206	-2.47099	0.0191681	0.0867418	-3.57677
SYNDIG1	-0.473396	3.11952	-2.46861	0.0192743	0.0871501	-3.58166
ADAM23	-0.333382	3.03558	-2.46743	0.0193274	0.0873174	-3.58409
LUZP1	-0.350127	3.31762	-2.46607	0.0193885	0.0874613	-3.58688
SIK2	-0.381478	2.71608	-2.46601	0.0193913	0.0874613	-3.58701
LPIN2	0.230676	2.71438	2.4652	0.019428	0.0875545	-3.58868
DSP	-0.333201	4.06395	-2.46361	0.0194995	0.0878043	-3.59193
DHFR	-0.45989	1.74206	-2.46284	0.0195347	0.0878902	-3.59352
SEC62	0.347493	3.26383	2.46174	0.0195845	0.0880413	-3.59577
POLB	-0.246755	2.95621	-2.4613	0.0196046	0.088059	-3.59668
MTERF3	-0.268069	2.81377	-2.45701	0.0198006	0.0888023	-3.60548
TGFBI	0.519959	3.5883	2.45697	0.0198026	0.0888023	-3.60556
PQBP1	-0.303055	2.51869	-2.45649	0.0198247	0.0888195	-3.60655
OLFML2B	0.45324	2.5661	2.45618	0.019839	0.0888195	-3.60719
THBS1	-0.824949	2.77059	-2.45529	0.0198798	0.0889236	-3.609
KRT7	-0.37282	2.16287	-2.45496	0.0198949	0.0889236	-3.60967
C12ORF43	-0.207292	2.13727	-2.45418	0.0199309	0.0889799	-3.61127
GRB14	-0.566643	2.22471	-2.45398	0.0199401	0.0889799	-3.61168
HNRNPUL1	-0.355443	2.80506	-2.45342	0.0199663	0.0889821	-3.61284
RPS6	0.261361	3.93265	2.45327	0.0199732	0.0889821	-3.61314
CEBPZ	-0.208889	2.47299	-2.45207	0.0200286	0.0890837	-3.61559
PRRG1	-0.308114	2.55864	-2.45181	0.0200409	0.0890837	-3.61613
SPOCK1	0.876635	3.46613	2.45172	0.0200451	0.0890837	-3.61632
MRPL22	-0.227197	2.91048	-2.45085	0.0200855	0.0891414	-3.61809
COX5A	-0.422526	4.24427	-2.45074	0.0200907	0.0891414	-3.61833
EEA1	-0.178427	2.05273	-2.45016	0.0201176	0.089188	-3.61951
ART3	-0.58816	3.53945	-2.44899	0.020172	0.0893566	-3.62189
DYSF	-0.227651	3.40791	-2.44756	0.020239	0.0895805	-3.62482
PRKAR2B	0.418314	3.05921	2.44584	0.0203196	0.0898129	-3.62833
INTS12	-0.191577	2.84989	-2.44545	0.0203383	0.0898129	-3.62914
PTPN13	0.360004	2.06387	2.44539	0.0203409	0.0898129	-3.62925
ST3GAL6	-0.367578	2.76106	-2.44468	0.0203743	0.0898875	-3.6307
UBE3C	-0.232181	2.84217	-2.44354	0.0204284	0.0900331	-3.63304
EPS15	0.311492	2.99453	2.44328	0.0204403	0.0900331	-3.63356
ATP5IF1	0.236188	3.39383	2.44234	0.020485	0.0901168	-3.63549
AP5M1	-0.201728	3.02297	-2.44218	0.0204924	0.0901168	-3.6358
ASXL2	0.251959	3.03407	2.43899	0.0206444	0.0907121	-3.64233
ALS2CL	-0.236005	2.98691	-2.43824	0.02068	0.0907378	-3.64385
MEF2D	-0.158046	2.86038	-2.4378	0.020701	0.0907378	-3.64474
PRSS22	-0.44109	2.68311	-2.43754	0.0207135	0.0907378	-3.64527
GALNT7	0.307151	2.17782	2.43747	0.0207168	0.0907378	-3.64542
VPS26C	-0.173177	2.9946	-2.43702	0.0207385	0.0907602	-3.64634
GLB1	0.22437	2.88917	2.43128	0.0210151	0.091897	-3.65803
RBM48	-0.293009	1.89903	-2.43067	0.0210448	0.0919195	-3.65928
ORAI3	0.270854	3.25995	2.43048	0.021054	0.0919195	-3.65966
TXNL4A	-0.2385	3.2771	-2.42987	0.0210836	0.091975	-3.6609
KDR	-0.48352	2.6861	-2.42951	0.0211008	0.0919765	-3.66162
ATF4	-0.330444	3.21049	-2.42854	0.0211484	0.0921106	-3.66361
CXCL11	1.17482	1.57164	2.42813	0.0211683	0.0921234	-3.66443
SMARCE1	0.191137	2.89531	2.42679	0.0212335	0.0923337	-3.66715
VPS4B	0.186487	2.81521	2.42572	0.021286	0.0924882	-3.66933
NIPA2	-0.351593	3.167	-2.42487	0.0213279	0.0925962	-3.67106
FOXO1	0.25632	2.96306	2.42354	0.0213934	0.0928036	-3.67376
ARFGAP3	-0.252073	2.71241	-2.42321	0.0214097	0.0928036	-3.67443
KCTD14	-0.444603	3.7738	-2.42124	0.0215072	0.0931036	-3.67844
TRIM66	0.508676	2.62658	2.42112	0.021513	0.0931036	-3.67868
ARHGEF9	0.272846	3.30629	2.41963	0.0215871	0.0933217	-3.68171
GGA1	0.203785	3.44865	2.41941	0.0215976	0.0933217	-3.68214
HIKESHI	-0.26057	2.03407	-2.41893	0.0216216	0.0933512	-3.68311
IGFBP5	0.321682	3.16608	2.41655	0.0217404	0.0937535	-3.68794
VAMP5	-0.279312	2.63069	-2.41615	0.0217607	0.0937535	-3.68876
SYPL1	-0.238429	3.11132	-2.41591	0.0217724	0.0937535	-3.68924
SRF	-0.244159	2.90177	-2.41569	0.0217836	0.0937535	-3.68969
DNAAF2	-0.220729	2.16875	-2.41526	0.0218051	0.0937721	-3.69056
MMADHC	-0.172878	3.44997	-2.41297	0.02192	0.0941923	-3.69519
PCCA	-0.255558	2.71775	-2.41244	0.021947	0.0941934	-3.69627
CPD	0.196678	2.81535	2.41228	0.0219548	0.0941934	-3.69659
CHMP1B	-0.377015	3.17992	-2.41088	0.0220258	0.0944062	-3.69943
ZNF140	0.304437	2.34819	2.41062	0.0220391	0.0944062	-3.69996
KLF11	0.284344	2.80113	2.40716	0.0222149	0.0950847	-3.70696
SMPD1	-0.300936	3.03615	-2.40613	0.0222676	0.0952201	-3.70904
SLCO2B1	0.563867	3.24157	2.40585	0.0222815	0.0952201	-3.70959
SLC38A1	-0.381716	3.36341	-2.40038	0.0225632	0.0962486	-3.72065
DOCK1	0.232117	3.33535	2.39998	0.0225837	0.0962486	-3.72145
AIMP2	-0.25021	3.1812	-2.39991	0.0225873	0.0962486	-3.72159
NR1H2	-0.302752	2.67538	-2.39981	0.0225927	0.0962486	-3.7218
ZBED5	0.157338	3.27126	2.3991	0.0226293	0.0963292	-3.72322
NLRP1	0.296888	2.12445	2.39809	0.022682	0.0964782	-3.72527
SAP18	0.243977	3.00654	2.39679	0.0227494	0.0966327	-3.72788
SUCLA2	-0.259548	3.66134	-2.39671	0.0227538	0.0966327	-3.72805
AK4	0.250004	2.89666	2.3962	0.0227804	0.0966705	-3.72908
THAP10	0.270621	2.65157	2.39584	0.0227989	0.0966738	-3.72979
TRIM44	0.166929	2.91173	2.39454	0.022867	0.096882	-3.73241
RACGAP1	-0.390907	1.5442	-2.39423	0.0228835	0.096882	-3.73305
SPECC1L	0.204956	2.69983	2.39286	0.0229553	0.0970009	-3.7358
UBE2D2	-0.259649	2.78004	-2.39274	0.0229617	0.0970009	-3.73605
SNED1	-0.240184	2.9801	-2.39267	0.022965	0.0970009	-3.73618
TRIM10	-0.40861	1.70994	-2.39176	0.0230132	0.0971293	-3.73802
ANK2	-0.431461	3.4327	-2.39094	0.0230566	0.0972248	-3.73968
GTF3C3	0.221988	2.68659	2.39065	0.0230715	0.0972248	-3.74024
RBM15	0.25352	2.6944	2.38921	0.0231478	0.097471	-3.74315
POLG	-0.15323	2.53281	-2.38826	0.023198	0.0975928	-3.74505
MEMO1	-0.296298	2.64234	-2.38785	0.0232198	0.0975928	-3.74588
PRPF3	0.202123	2.56341	2.38761	0.0232327	0.0975928	-3.74637
PLEK	0.734293	2.92519	2.38732	0.0232483	0.0975928	-3.74696
CCT6B	-0.423208	2.22653	-2.38596	0.0233207	0.0978216	-3.74969
ABCA6	0.442654	2.71625	2.38501	0.023371	0.0979571	-3.75158
SS18	0.198778	2.33635	2.38352	0.0234512	0.0982175	-3.75459
TUBG2	-0.269087	1.78033	-2.38292	0.0234832	0.0982316	-3.75579
INPP4B	0.433582	2.33658	2.38278	0.0234906	0.0982316	-3.75607
TGFBR2	0.375794	3.62825	2.38228	0.0235172	0.0982678	-3.75706
PER1	0.361175	3.36557	2.37719	0.0237924	0.0993414	-3.76728
DECR1	-0.278525	3.90238	-2.3767	0.0238188	0.0993756	-3.76826
PSMD12	-0.26559	2.70357	-2.37623	0.0238444	0.0994063	-3.7692
SEC16A	0.254704	2.85831	2.37581	0.0238675	0.0994265	-3.77005
BAG2	-0.296898	2.95818	-2.37315	0.0240127	0.0999526	-3.77538
SEMA3F	-0.338939	3.16288	-2.37283	0.0240304	0.0999526	-3.77602
DCT	-0.387458	2.16122	-2.37157	0.0240993	0.100163	-3.77854
MMP2	0.387403	3.55411	2.37047	0.0241599	0.100338	-3.78074
PXMP2	-0.433554	3.15901	-2.36904	0.0242385	0.100588	-3.78359
MAP2K2	-0.344342	3.06144	-2.36718	0.0243415	0.100938	-3.78731
SLC25A46	-0.206674	3.32915	-2.36393	0.0245226	0.101612	-3.79382
ANXA5	0.249527	3.15252	2.3607	0.0247033	0.102283	-3.80026
ARHGAP24	0.420114	2.59377	2.35951	0.0247703	0.102483	-3.80264
RPRD2	0.275192	3.35098	2.35839	0.0248336	0.102667	-3.80487
TAOK3	0.170123	2.44572	2.35756	0.0248801	0.102781	-3.80651
NUDCD3	-0.142793	3.23065	-2.3566	0.0249343	0.10285	-3.80842
CD9	0.419731	3.50739	2.3566	0.0249346	0.10285	-3.80843
CRNKL1	0.293776	2.73196	2.35535	0.0250054	0.103048	-3.81092
MRC1	0.797251	3.55559	2.35507	0.0250215	0.103048	-3.81148
COL4A5	0.492611	2.70517	2.35467	0.0250441	0.103048	-3.81228
COL6A2	0.370438	3.07777	2.35442	0.0250582	0.103048	-3.81277
KDSR	-0.218645	2.73752	-2.35226	0.0251819	0.103373	-3.81708
KTN1	-0.245331	3.23818	-2.35213	0.0251888	0.103373	-3.81733
CAV2	-0.255841	3.71026	-2.35205	0.0251939	0.103373	-3.8175
GOLGB1	0.216815	2.97383	2.3517	0.0252137	0.103376	-3.81819
PTGDS	-0.371455	4.93483	-2.34868	0.0253873	0.10401	-3.8242
GLUD1	0.166358	3.30187	2.34739	0.0254616	0.104089	-3.82676
SIDT2	0.3104	3.32769	2.34738	0.0254622	0.104089	-3.82678
PGC	-0.168436	2.4042	-2.34735	0.025464	0.104089	-3.82685
SDC4	-0.350959	3.13804	-2.34651	0.0255125	0.104179	-3.82851
CKB	-0.605703	3.31161	-2.34589	0.0255484	0.104179	-3.82975
NDUFC1	-0.183371	4.13294	-2.34585	0.0255508	0.104179	-3.82983
ZNF212	0.18327	2.65772	2.34522	0.025587	0.104179	-3.83107
TTN	-0.285404	4.62212	-2.34504	0.0255976	0.104179	-3.83143
GADD45GIP1	-0.286699	2.58784	-2.34499	0.0256004	0.104179	-3.83153
CC2D1A	-0.264793	2.3209	-2.34351	0.0256863	0.104409	-3.83446
PNP	-0.587617	2.42789	-2.34336	0.0256954	0.104409	-3.83477
PPCS	0.229408	3.01686	2.34303	0.0257146	0.104409	-3.83543
CNNM4	-0.343097	2.70265	-2.34267	0.0257351	0.104415	-3.83612
TAL1	0.187135	2.23737	2.3397	0.0259091	0.105043	-3.84203
ZMIZ1	0.183828	3.56025	2.33902	0.0259492	0.105127	-3.84338
MYO1D	0.417702	2.26576	2.33752	0.0260375	0.105407	-3.84635
FLCN	-0.226087	2.29047	-2.33712	0.0260608	0.105422	-3.84714
COPS3	-0.172096	3.03856	-2.33643	0.0261018	0.105496	-3.84851
ATIC	-0.195766	2.69228	-2.33616	0.0261175	0.105496	-3.84904
GNL2	-0.219115	2.06423	-2.33534	0.0261663	0.105614	-3.85067
SCD	-0.844536	2.31443	-2.33443	0.0262201	0.105686	-3.85247
TNFSF13	0.443195	2.97622	2.33438	0.0262228	0.105686	-3.85256
SLC35A1	0.187579	2.84835	2.33336	0.0262834	0.105728	-3.85458
SNCA	0.592571	2.87235	2.33327	0.0262888	0.105728	-3.85476
APPL2	0.248274	2.36469	2.33322	0.0262915	0.105728	-3.85485
STAU2	-0.230718	2.58293	-2.33252	0.0263333	0.105818	-3.85624
ZDHHC7	-0.159128	3.23604	-2.3318	0.0263766	0.105838	-3.85768
NSMF	-0.274824	2.67007	-2.33179	0.0263771	0.105838	-3.8577
HEPH	0.435774	2.73383	2.33083	0.0264345	0.105991	-3.8596
EDRF1	0.192006	2.92697	2.32932	0.0265248	0.106234	-3.86258
IFIT5	0.266319	2.8626	2.32916	0.0265341	0.106234	-3.86289
CHST15	0.460414	2.71746	2.32733	0.0266443	0.106577	-3.86651
MTFR1	-0.292234	2.48423	-2.32708	0.0266589	0.106577	-3.86699
CHCHD3	-0.259887	3.50792	-2.32598	0.0267252	0.106763	-3.86917
TNKS	0.26049	2.85855	2.32566	0.0267445	0.106763	-3.8698
PLEKHF2	-0.253899	2.18755	-2.32416	0.0268357	0.107044	-3.87278
RIC8B	-0.231471	2.93029	-2.32385	0.0268541	0.107044	-3.87337
TMEM140	0.370067	2.95858	2.32347	0.0268774	0.107058	-3.87413
ATP11B	0.262262	2.29966	2.32304	0.0269037	0.107084	-3.87499
MAN2A2	-0.346157	2.75821	-2.32248	0.0269373	0.10714	-3.87608
MASP1	0.427108	3.11632	2.32214	0.0269579	0.107144	-3.87675
BUB3	0.201858	2.58453	2.31931	0.0271305	0.10773	-3.88233
NRAP	-0.406093	3.48643	-2.31908	0.0271448	0.10773	-3.88279
ITGAV	-0.261508	3.74	-2.3182	0.0271987	0.107762	-3.88452
GABARAPL1	-0.374485	3.71819	-2.31779	0.0272238	0.107762	-3.88533
PDK4	0.900416	3.44172	2.31753	0.0272398	0.107762	-3.88584
HDDC2	-0.260492	2.93799	-2.31741	0.0272469	0.107762	-3.88607
OBSL1	-0.304302	3.02929	-2.31654	0.0273004	0.107762	-3.88778
MGLL	0.262254	3.8352	2.31647	0.0273047	0.107762	-3.88792
WDR55	-0.198509	2.74687	-2.31639	0.02731	0.107762	-3.88809
NGRN	-0.265808	3.78564	-2.31637	0.0273111	0.107762	-3.88813
TSPAN9	0.277335	2.91978	2.31542	0.0273696	0.107915	-3.88999
PFKFB2	-0.576132	3.30984	-2.31505	0.0273922	0.107918	-3.89072
MLF2	-0.322359	3.36507	-2.31474	0.0274113	0.107918	-3.89133
MRPS17	-0.230064	3.04525	-2.31444	0.0274298	0.107918	-3.89191
BHLHE41	0.331059	2.69619	2.31173	0.0275979	0.108501	-3.89725
UBE2V2	-0.148988	2.52548	-2.30905	0.0277646	0.109078	-3.90251
LYPLA2	-0.162	3.16678	-2.30787	0.0278389	0.109291	-3.90484
MRTFA	-0.21023	2.54469	-2.30649	0.027925	0.109551	-3.90754
TSR1	-0.215041	2.02024	-2.30564	0.0279787	0.109682	-3.90922
DHRS4	-0.192433	2.57058	-2.30485	0.0280285	0.109799	-3.91077
TBL1XR1	0.188008	2.86739	2.3038	0.0280947	0.109979	-3.91283
COL21A1	0.461122	3.64526	2.30321	0.0281319	0.110019	-3.91399
FMO4	0.472703	3.1494	2.303	0.0281452	0.110019	-3.9144
MBD4	-0.261016	2.34031	-2.29876	0.0284141	0.11099	-3.9227
PRKAA2	-0.255345	2.58923	-2.29832	0.0284422	0.110999	-3.92356
INHBC	-0.458165	2.39063	-2.29809	0.028457	0.110999	-3.92402
ILVBL	-0.320655	3.09235	-2.29725	0.0285106	0.111122	-3.92566
GASK1B	0.353642	2.44899	2.29696	0.0285294	0.111122	-3.92623
ATP5MC3	-0.223419	4.08746	-2.2966	0.0285522	0.111131	-3.92693
ACADS	-0.292567	2.82934	-2.29595	0.0285943	0.111215	-3.92821
THAP11	-0.187542	2.81514	-2.29536	0.0286323	0.111215	-3.92937
SELP	0.43399	3.02453	2.29482	0.0286667	0.111215	-3.93042
CPED1	0.33496	2.63688	2.29476	0.0286705	0.111215	-3.93053
SOCS6	-0.590794	1.94361	-2.29468	0.0286757	0.111215	-3.93069
RRN3	0.245266	2.20937	2.29382	0.0287312	0.111253	-3.93238
HADHB	-0.316448	4.66227	-2.29368	0.0287398	0.111253	-3.93264
FSCN1	0.358508	2.59306	2.2932	0.0287709	0.111253	-3.93358
VPS13D	-0.2767	3.17031	-2.29288	0.0287918	0.111253	-3.93422
RRP8	-0.180788	2.53855	-2.29284	0.0287941	0.111253	-3.93429
LRP10	-0.276918	3.41028	-2.29263	0.0288078	0.111253	-3.9347
ANKRA2	0.212734	2.74929	2.29186	0.0288576	0.111322	-3.93621
SLC25A3	-0.237904	4.67381	-2.29151	0.0288799	0.111322	-3.93688
ARL15	-0.245659	2.3401	-2.29141	0.0288869	0.111322	-3.93709
HSPB11	0.250153	2.07855	2.29072	0.0289311	0.111413	-3.93843
MAP2K1	-0.291849	3.43281	-2.28987	0.0289868	0.111549	-3.9401
ALCAM	0.524141	3.11319	2.28918	0.0290314	0.111603	-3.94144
FCGR2B	0.655648	2.79056	2.28873	0.0290607	0.111603	-3.94232
MANF	0.226123	2.92388	2.2887	0.0290623	0.111603	-3.94237
MCCC2	-0.33263	3.21513	-2.28816	0.0290975	0.111622	-3.94343
WDR5B	0.314484	2.72134	2.288	0.0291081	0.111622	-3.94374
DPYD	0.392983	2.44053	2.28758	0.0291357	0.111649	-3.94457
BPTF	0.180425	2.84767	2.28715	0.0291636	0.111678	-3.9454
SSBP2	0.215923	2.90425	2.28611	0.0292313	0.111858	-3.94743
CHMP7	-0.276575	2.70517	-2.28511	0.0292968	0.112023	-3.94938
MPC2	-0.206875	3.66745	-2.28483	0.0293155	0.112023	-3.94993
UBE2K	-0.172597	2.83565	-2.28376	0.0293858	0.112214	-3.95202
ADAMTSL3	0.277755	2.8752	2.28121	0.0295535	0.112775	-3.95698
PFKM	-0.266922	4.53499	-2.28077	0.0295826	0.112798	-3.95784
UBC	0.199875	4.31869	2.28028	0.0296154	0.112798	-3.9588
DNPEP	-0.160183	2.79229	-2.28018	0.0296217	0.112798	-3.95899
PAFAH1B1	-0.205031	2.75053	-2.27935	0.0296771	0.11293	-3.96062
APBA3	-0.18419	2.4572	-2.27853	0.0297312	0.113057	-3.9622
RELA	-0.202176	3.1906	-2.27808	0.0297612	0.113092	-3.96308
ADAP2	0.377841	2.85923	2.27511	0.0299596	0.113632	-3.96887
DLX4	0.34267	2.81229	2.27505	0.0299637	0.113632	-3.96898
ABITRAM	0.203148	3.12924	2.27487	0.0299753	0.113632	-3.96932
CASQ1	-0.48078	2.91258	-2.27471	0.0299864	0.113632	-3.96964
MPHOSPH8	0.228925	3.23898	2.2737	0.0300536	0.113807	-3.97159
PKP4	-0.259288	2.95074	-2.2725	0.0301346	0.114029	-3.97394
SDR39U1	-0.292164	3.0868	-2.27221	0.0301541	0.114029	-3.9745
ATP6V0C	-0.187135	3.8642	-2.27158	0.0301962	0.114109	-3.97571
ZC3H13	0.238538	2.72154	2.27013	0.0302942	0.1144	-3.97853
COLEC11	0.466495	3.29934	2.26863	0.0303956	0.11464	-3.98144
TSPAN13	-0.389983	3.02653	-2.26857	0.0303996	0.11464	-3.98156
SMC5	-0.312446	2.36257	-2.26802	0.0304371	0.114702	-3.98263
SBF1	-0.211395	3.00072	-2.26671	0.0305261	0.114958	-3.98517
BAZ1B	0.19976	3.02697	2.26548	0.0306098	0.115193	-3.98755
MDFIC	0.326285	2.63383	2.26466	0.0306661	0.115305	-3.98915
MPPED2	-0.367966	1.9266	-2.26443	0.0306818	0.115305	-3.9896
HSPA2	0.573722	3.00226	2.26388	0.0307194	0.115367	-3.99066
HPCAL1	-0.18186	2.5887	-2.26343	0.0307502	0.115403	-3.99153
FGD1	-0.23038	2.82784	-2.26184	0.0308591	0.115732	-3.99461
NETO2	-0.387903	2.03582	-2.26107	0.0309123	0.115852	-3.99611
BBS1	0.211852	2.99056	2.26074	0.030935	0.115858	-3.99675
GATA3	0.332317	2.48114	2.26041	0.0309577	0.115863	-3.99738
KAT8	-0.168186	2.54552	-2.25893	0.0310597	0.116165	-4.00024
HMG20A	0.270201	2.4521	2.2586	0.0310826	0.116171	-4.00088
SLC1A1	-0.461172	2.10503	-2.25679	0.0312081	0.116517	-4.00439
AGL	-0.188065	3.31485	-2.25647	0.0312302	0.116517	-4.005
UBE2L6	0.452573	3.06609	2.25615	0.0312523	0.116517	-4.00562
TMEM80	0.260497	2.6248	2.25603	0.0312606	0.116517	-4.00585
ZFX	-0.296484	1.69356	-2.25561	0.0312897	0.116546	-4.00666
STAG2	0.216326	2.6415	2.25439	0.0313751	0.116704	-4.00903
PDSS2	-0.194196	2.34861	-2.25439	0.0313752	0.116704	-4.00903
NUAK1	0.258674	3.58169	2.25403	0.0313999	0.116717	-4.00971
WDR48	0.195484	2.66343	2.25352	0.0314354	0.116769	-4.01069
IQGAP1	0.303725	2.65358	2.25253	0.0315048	0.116947	-4.01261
RASA1	0.164897	2.90137	2.25139	0.0315846	0.117089	-4.01481
FICD	0.359175	2.68774	2.25137	0.031586	0.117089	-4.01485
ORC5	0.217782	1.97366	2.25087	0.0316215	0.117141	-4.01582
PPM1D	-0.195896	1.95096	-2.24799	0.031824	0.117811	-4.02137
AP1S2	-0.230864	3.39923	-2.24747	0.0318607	0.117833	-4.02237
ABI1	0.157137	2.39285	2.2473	0.031873	0.117833	-4.02271
WNT6	-0.373947	3.22032	-2.2459	0.0319717	0.118118	-4.02539
SLC25A13	-0.248627	1.83938	-2.24519	0.0320227	0.118219	-4.02677
NPTX2	-0.791284	2.5558	-2.24477	0.0320518	0.118219	-4.02757
EML4	0.354126	2.32334	2.2446	0.0320642	0.118219	-4.0279
TSPAN4	0.315169	3.01633	2.24352	0.0321409	0.118403	-4.02998
AKAP11	0.177546	2.68615	2.24329	0.0321574	0.118403	-4.03042
SLC16A7	-0.389393	2.89307	-2.24291	0.0321847	0.118423	-4.03116
PDHB	-0.256936	3.92393	-2.24177	0.0322663	0.118553	-4.03336
PIAS2	-0.266289	1.72445	-2.24148	0.0322869	0.118553	-4.03391
CD44	0.463935	2.59005	2.24145	0.0322892	0.118553	-4.03397
DAO	0.327214	2.50673	2.2412	0.0323069	0.118553	-4.03445
ATP8A1	0.230352	2.98033	2.23857	0.0324957	0.119166	-4.03951
SEMA6A	-0.401113	2.79641	-2.23698	0.0326101	0.11949	-4.04255
LGALS3BP	-0.278816	3.77419	-2.23674	0.0326279	0.11949	-4.04303
ITPK1	-0.19693	3.52384	-2.23376	0.0328434	0.120198	-4.04874
WDR11	0.201955	2.23399	2.23312	0.03289	0.120288	-4.04997
DESI2	-0.160045	2.82907	-2.23277	0.0329155	0.120301	-4.05064
C7ORF25	-0.218668	1.70367	-2.23163	0.0329983	0.120522	-4.05282
HOMER3	-0.24488	2.46439	-2.23096	0.0330478	0.120587	-4.05412
RPL22	0.164424	3.66562	2.23079	0.0330603	0.120587	-4.05445
RNASEH1	-0.222513	2.753	-2.22953	0.033152	0.120841	-4.05685
JRKL	0.249952	2.48352	2.22901	0.0331904	0.1209	-4.05785
CHL1	-0.509902	2.12999	-2.22775	0.0332827	0.121155	-4.06026
HLA-DQA1	0.868468	2.7308	2.22687	0.0333479	0.121312	-4.06196
FXR2	-0.318083	3.05088	-2.22581	0.0334262	0.121515	-4.06399
CAVIN2	0.321244	2.99631	2.22537	0.0334587	0.121552	-4.06483
EMP2	-0.217877	3.16055	-2.2241	0.0335526	0.121813	-4.06726
TYMP	-0.347763	1.5567	-2.22308	0.0336281	0.122005	-4.06921
WAC	-0.172929	2.72097	-2.22031	0.033834	0.122671	-4.0745
CAVIN1	0.195689	3.23267	2.21841	0.0339759	0.123103	-4.07813
MAP2K4	-0.189207	2.70026	-2.21785	0.0340185	0.123176	-4.07921
TCF4	0.207034	3.01376	2.21738	0.0340536	0.123221	-4.08011
TM2D3	-0.255356	3.46005	-2.21668	0.0341062	0.12333	-4.08144
SLC48A1	-0.155203	3.22933	-2.21631	0.0341336	0.123347	-4.08214
PHYH	-0.247542	3.65887	-2.21307	0.034378	0.124089	-4.08831
DNM1L	0.152798	2.76717	2.21299	0.0343846	0.124089	-4.08848
PDZRN3	-0.220139	3.30473	-2.21232	0.0344355	0.12414	-4.08976
RRAGA	-0.169205	3.68521	-2.2122	0.034444	0.12414	-4.08998
RHEB	-0.297727	3.06784	-2.21135	0.0345086	0.124168	-4.0916
MON2	0.227972	2.81251	2.21127	0.0345145	0.124168	-4.09175
RALB	-0.178935	2.90386	-2.21087	0.0345451	0.124168	-4.09251
GPN3	-0.210659	2.6635	-2.21082	0.0345492	0.124168	-4.09262
PGAM1	0.212891	3.99413	2.2106	0.0345658	0.124168	-4.09303
PITPNA	-0.187334	2.98555	-2.20993	0.0346165	0.124269	-4.0943
FADS2	-0.286046	2.7102	-2.20944	0.0346539	0.124316	-4.09523
RTCA	0.187951	2.8999	2.20916	0.0346752	0.124316	-4.09577
HTR2A	0.492936	2.34148	2.2083	0.034741	0.124383	-4.09741
NDC1	-0.254413	1.77265	-2.20809	0.0347573	0.124383	-4.09781
NEDD9	0.307919	2.8055	2.20802	0.0347624	0.124383	-4.09794
KLHL7	-0.269513	2.67207	-2.20654	0.0348761	0.124708	-4.10077
TAGLN	0.502152	3.7041	2.20443	0.0350377	0.12518	-4.10476
SH3GLB1	-0.262986	3.69776	-2.20422	0.0350542	0.12518	-4.10517
PNISR	0.188851	2.65288	2.20373	0.0350918	0.125233	-4.1061
HNMT	0.31322	2.78582	2.2022	0.0352098	0.125572	-4.109
ATP6V1B2	0.18809	3.34767	2.20174	0.035246	0.125619	-4.10989
GLIPR1	0.519505	2.37309	2.20115	0.0352917	0.125699	-4.11101
SFXN3	0.260233	2.6833	2.19738	0.035585	0.126517	-4.11817
DGCR2	-0.242293	2.59153	-2.1972	0.0355987	0.126517	-4.1185
HIPK2	0.276581	3.03543	2.19708	0.0356081	0.126517	-4.11873
PCF11	0.239223	2.54378	2.19687	0.0356249	0.126517	-4.11914
CYB5R1	0.333792	3.96825	2.1965	0.0356531	0.126517	-4.11982
APAF1	0.337894	2.08873	2.19641	0.0356605	0.126517	-4.12
NT5E	0.413766	2.212	2.19424	0.0358306	0.127038	-4.12411
SRSF11	0.171166	2.70574	2.19249	0.0359684	0.127444	-4.12743
SMAD3	-0.241152	2.56176	-2.1888	0.0362601	0.128315	-4.13441
PROCR	-0.310889	2.09321	-2.18854	0.0362809	0.128315	-4.1349
MAPK1IP1L	-0.183176	3.03917	-2.18849	0.0362851	0.128315	-4.135
OSBPL8	0.252278	2.74387	2.18777	0.0363417	0.128433	-4.13635
NUS1	-0.260259	1.6231	-2.18697	0.0364061	0.128488	-4.13788
RAPGEF6	0.266307	2.17952	2.18678	0.0364209	0.128488	-4.13823
FAM53C	-0.154963	3.05802	-2.18669	0.036428	0.128488	-4.1384
CNOT9	-0.242536	2.48131	-2.18589	0.036492	0.12863	-4.13991
KIF13A	0.236913	2.46597	2.18483	0.0365766	0.128822	-4.14191
UEVLD	-0.232728	2.33158	-2.18443	0.0366091	0.128822	-4.14268
ZNF451	0.182737	2.78534	2.18432	0.0366173	0.128822	-4.14287
CAMK2G	0.186466	2.80734	2.18372	0.0366653	0.128908	-4.144
JAK1	-0.19668	3.41264	-2.18337	0.0366938	0.128925	-4.14467
ADCY3	-0.255649	2.37472	-2.18255	0.0367596	0.129073	-4.14622
FBXO38	0.126916	3.10379	2.18225	0.0367835	0.129074	-4.14678
POMGNT1	-0.192596	3.06838	-2.18131	0.0368592	0.129256	-4.14856
KLF5	-0.609358	2.22379	-2.17973	0.0369871	0.129621	-4.15155
PTPN12	-0.223622	2.87296	-2.17907	0.0370405	0.129725	-4.15279
CKM	-0.329892	5.54102	-2.17784	0.0371396	0.129989	-4.1551
ILF3	-0.170872	2.6524	-2.17705	0.0372039	0.13013	-4.15659
KCNB1	0.475604	2.37803	2.17639	0.0372581	0.130236	-4.15785
PPT1	0.274608	3.04563	2.17538	0.0373399	0.130439	-4.15974
GADD45B	-0.593382	3.09727	-2.17371	0.0374761	0.130762	-4.16288
GNA12	-0.219071	2.31731	-2.17361	0.0374849	0.130762	-4.16308
MTF1	0.169193	2.86578	2.17337	0.0375044	0.130762	-4.16353
ZNF177	0.201162	2.04355	2.17176	0.0376358	0.131078	-4.16655
PRUNE1	-0.294878	2.87831	-2.17167	0.0376433	0.131078	-4.16672
TBCA	0.18447	3.32867	2.16988	0.0377908	0.131508	-4.17009
BORA	0.374973	2.33243	2.16858	0.0378978	0.131796	-4.17253
TEAD3	-0.408894	2.60651	-2.1676	0.037979	0.131995	-4.17437
CLSTN1	0.210189	3.16029	2.16719	0.0380129	0.132028	-4.17514
EXPH5	-0.487681	2.07136	-2.16685	0.0380407	0.132041	-4.17577
APPL1	0.222283	2.86682	2.16544	0.0381578	0.132363	-4.17842
TMEM260	0.266161	2.50328	2.1642	0.0382613	0.132513	-4.18075
AK2	-0.142653	2.58953	-2.16408	0.038271	0.132513	-4.18097
STX6	0.177093	2.66858	2.16405	0.0382741	0.132513	-4.18104
MCM3AP	-0.129151	3.02096	-2.16089	0.0385378	0.133337	-4.18696
PTEN	0.218592	2.43027	2.16062	0.0385607	0.133337	-4.18747
SLC25A5	0.253031	3.56183	2.15975	0.0386336	0.133435	-4.18909
F5	-0.659426	2.13964	-2.1597	0.0386381	0.133435	-4.1892
IK	0.196667	3.26043	2.15707	0.0388594	0.134031	-4.19411
PDGFC	0.220536	2.99337	2.15689	0.0388746	0.134031	-4.19445
PANK2	0.152132	2.606	2.15677	0.0388846	0.134031	-4.19467
PPARA	-0.272762	1.57889	-2.15571	0.0389744	0.134256	-4.19666
PLAAT4	0.699973	2.70134	2.15436	0.0390886	0.134436	-4.19918
TLR3	0.326411	2.07825	2.15426	0.0390974	0.134436	-4.19937
GAK	0.25679	3.17585	2.15422	0.0391005	0.134436	-4.19944
CMTM6	0.284484	2.72606	2.15377	0.0391392	0.134484	-4.20029
SPON1	0.557043	2.66978	2.1532	0.0391871	0.134564	-4.20134
ROBO1	0.374145	2.2871	2.15125	0.0393539	0.135052	-4.205
PURA	0.212265	3.14424	2.14896	0.03955	0.135639	-4.20927
TEFM	-0.176565	2.7287	-2.14573	0.0398281	0.136503	-4.2153
ARMC6	-0.300197	2.68239	-2.14545	0.039852	0.136503	-4.21582
ACTL6A	-0.224477	2.02984	-2.14506	0.0398858	0.136533	-4.21655
DRAP1	-0.209941	3.09038	-2.14423	0.039957	0.136646	-4.21808
DDX54	-0.179422	2.64252	-2.1441	0.0399689	0.136646	-4.21834
APOD	-0.659763	4.72718	-2.14141	0.0402021	0.137357	-4.22334
DCAF10	-0.190925	2.69369	-2.13983	0.0403401	0.137742	-4.22628
BCLAF1	0.161979	2.36721	2.13846	0.0404596	0.138064	-4.22883
BMPR1A	-0.231884	2.86803	-2.13675	0.0406095	0.138489	-4.23201
PLA2G2A	-0.97832	3.74262	-2.13646	0.040635	0.138489	-4.23255
MYL7	-0.820878	5.1728	-2.13591	0.0406837	0.138563	-4.23357
PIR	-0.25048	1.88899	-2.13564	0.0407076	0.138563	-4.23408
CSTA	0.596209	2.21959	2.13382	0.0408677	0.139022	-4.23745
ALPG	-0.298195	2.81323	-2.13269	0.0409674	0.139274	-4.23954
TNFRSF11B	-0.609693	1.84906	-2.13177	0.0410494	0.139466	-4.24126
PDLIM5	-0.231007	3.77813	-2.12903	0.0412934	0.140207	-4.24635
LIMD1	0.236606	2.88824	2.12768	0.0414131	0.140386	-4.24883
NUP88	-0.159762	2.42011	-2.1273	0.0414471	0.140386	-4.24954
PPP2R3B	-0.37743	2.53986	-2.12722	0.0414542	0.140386	-4.24968
TBC1D15	-0.241115	2.57878	-2.12719	0.0414575	0.140386	-4.24975
RHBDD3	-0.179321	2.49313	-2.12699	0.0414747	0.140386	-4.25011
FAM102A	0.295209	2.82776	2.12419	0.0417264	0.14115	-4.2553
YAP1	-0.231824	2.64544	-2.12343	0.041795	0.141295	-4.25671
MAP3K5	0.24326	2.84057	2.12161	0.0419593	0.141762	-4.26008
SYNRG	0.273247	2.53083	2.12089	0.042024	0.141893	-4.2614
RPS4X	0.26721	3.43448	2.12039	0.0420693	0.141958	-4.26232
RHOBTB3	-0.143946	2.56417	-2.1189	0.0422048	0.142259	-4.26508
RYBP	0.213176	2.71074	2.11883	0.0422108	0.142259	-4.2652
ACO1	-0.206326	3.33986	-2.11842	0.0422481	0.142297	-4.26596
WDR12	-0.221109	2.78181	-2.11804	0.0422827	0.142326	-4.26666
WDR1	-0.252128	3.2088	-2.11673	0.0424024	0.14264	-4.26909
CDC42EP3	-0.285173	3.23388	-2.11626	0.0424457	0.142698	-4.26996
GULP1	-0.293677	1.94327	-2.11476	0.0425823	0.143069	-4.27272
CCDC92	-0.282073	3.695	-2.11432	0.0426227	0.143117	-4.27353
TOR4A	-0.230144	2.52976	-2.11074	0.0429527	0.144098	-4.28014
ASAP2	0.197723	2.59233	2.11057	0.0429679	0.144098	-4.28044
INPPL1	-0.229886	2.84406	-2.10959	0.0430591	0.144186	-4.28226
CDC7	-0.426129	1.86965	-2.10946	0.0430703	0.144186	-4.28248
DCN	0.335441	4.26429	2.10943	0.0430733	0.144186	-4.28254
COL6A1	0.243041	3.27684	2.10842	0.0431673	0.144397	-4.28441
TSR2	0.134624	3.18104	2.10818	0.0431893	0.144397	-4.28485
TUT7	0.253986	2.74286	2.10501	0.0434846	0.145295	-4.29068
MACROD1	-0.368806	2.89958	-2.10368	0.0436084	0.14562	-4.29312
CSAD	0.224647	2.15562	2.10293	0.043679	0.145766	-4.2945
KLHL18	-0.188374	2.79783	-2.10133	0.0438287	0.146105	-4.29743
PIGA	-0.32209	1.79553	-2.10074	0.0438842	0.146105	-4.29852
MSANTD3	-0.29641	1.49736	-2.10073	0.0438855	0.146105	-4.29854
ACADSB	-0.215811	2.24789	-2.1005	0.0439074	0.146105	-4.29897
SFMBT1	-0.190144	2.52093	-2.10042	0.0439144	0.146105	-4.2991
DPM3	0.177755	2.63465	2.09928	0.044022	0.146373	-4.3012
ANKRD40	-0.234799	2.90578	-2.09854	0.0440916	0.146515	-4.30255
RINT1	-0.242317	1.84896	-2.09645	0.0442896	0.147083	-4.30638
VAMP4	-0.110501	2.37729	-2.09588	0.0443438	0.147174	-4.30743
SLCO2A1	0.417186	3.29158	2.09548	0.0443823	0.147212	-4.30817
ZC3H7A	0.133361	2.45147	2.09469	0.0444571	0.147371	-4.30961
ITPR1	0.250803	2.8265	2.0939	0.0445322	0.147408	-4.31106
CLPTM1	-0.314953	3.22371	-2.09365	0.0445563	0.147408	-4.31152
CASK	0.232955	2.73659	2.09354	0.0445671	0.147408	-4.31173
MED20	-0.234473	2.82233	-2.09344	0.0445765	0.147408	-4.31191
RPS18	0.13774	3.45495	2.09287	0.0446301	0.147496	-4.31294
MRPS27	0.33511	3.4139	2.09188	0.0447256	0.147722	-4.31476
MRPL11	-0.26375	2.62815	-2.09152	0.0447601	0.147746	-4.31542
MCMBP	-0.214557	2.49182	-2.08987	0.0449177	0.148177	-4.31843
BTG3	-0.244858	2.22495	-2.0884	0.045059	0.148484	-4.32111
AP2B1	0.157189	3.48586	2.08834	0.0450653	0.148484	-4.32123
USP21	0.213987	2.93885	2.08672	0.0452215	0.148909	-4.32419
RAB4A	-0.265171	2.88757	-2.08566	0.0453237	0.149155	-4.32612
KIF22	0.248125	2.41692	2.08498	0.0453895	0.149282	-4.32736
ECHDC3	0.239771	3.38705	2.08445	0.0454415	0.149363	-4.32834
ATP6V0E1	-0.148187	3.45325	-2.0837	0.0455142	0.149511	-4.3297
FTSJ3	0.193245	2.92299	2.08233	0.0456477	0.14986	-4.33221
MYLK	0.25958	2.5572	2.08118	0.0457591	0.150135	-4.33429
PLPPR4	0.41008	1.95562	2.07828	0.0460438	0.150978	-4.33958
ZNF84	0.163977	2.19906	2.07788	0.0460831	0.151016	-4.34031
PRMT1	-0.22336	3.50265	-2.07711	0.0461585	0.151095	-4.34171
DDX50	0.440669	3.22089	2.07707	0.0461624	0.151095	-4.34178
HEG1	0.209901	3.59478	2.07524	0.0463428	0.151505	-4.34511
ZNF710	0.313504	2.99007	2.07524	0.0463432	0.151505	-4.34512
AZIN1	0.27174	2.99503	2.07425	0.0464409	0.151733	-4.34692
CDH5	-0.249533	3.02363	-2.07364	0.0465015	0.15184	-4.34803
KAT6A	0.200075	3.31248	2.07244	0.0466204	0.152137	-4.35021
RAB6B	-0.245548	3.23877	-2.07079	0.0467839	0.152513	-4.35319
DUSP22	-0.183516	3.17189	-2.07044	0.0468192	0.152513	-4.35384
RALGAPA1	0.168625	2.67897	2.07043	0.0468194	0.152513	-4.35384
APOM	-0.278255	2.21044	-2.07006	0.0468564	0.152525	-4.35452
ITPR2	0.247969	2.0066	2.0697	0.0468924	0.152525	-4.35517
CSNK2A2	-0.181468	2.74854	-2.06956	0.0469071	0.152525	-4.35544
DPM1	0.197138	3.09781	2.069	0.0469627	0.152543	-4.35645
CREB1	-0.198002	2.36343	-2.06894	0.0469685	0.152543	-4.35655
TOM1L1	-0.260289	1.72728	-2.06784	0.0470787	0.15281	-4.35855
ZFYVE9	-0.221076	2.92444	-2.06633	0.0472302	0.15321	-4.36129
KRT10	-0.234926	2.98173	-2.0659	0.0472728	0.153257	-4.36206
TASOR	0.181686	2.79404	2.06443	0.0474213	0.153647	-4.36474
SMARCA1	-0.172996	2.68099	-2.0636	0.0475051	0.153741	-4.36624
POLR3C	0.154025	2.46393	2.06358	0.0475066	0.153741	-4.36627
TCTA	0.29558	3.15578	2.06194	0.0476722	0.154099	-4.36923
REEP5	-0.165721	3.74062	-2.06193	0.0476739	0.154099	-4.36926
UBE2E3	-0.170341	3.28399	-2.06025	0.0478444	0.154559	-4.37231
TMEM30B	0.515124	2.48695	2.05731	0.0481428	0.155431	-4.37761
MYO15B	0.304207	2.76671	2.05587	0.0482909	0.15577	-4.38022
AMZ2	0.203868	3.22501	2.05573	0.0483049	0.15577	-4.38047
RBFOX2	-0.195016	2.86634	-2.05426	0.0484561	0.156165	-4.38313
AP4S1	-0.206753	1.98956	-2.05141	0.0487492	0.157017	-4.38826
PROS1	0.549275	3.65448	2.04804	0.049098	0.158031	-4.39433
CYP2J2	0.324666	3.7282	2.04755	0.0491489	0.158031	-4.39521
UBA6	-0.195673	2.06643	-2.04753	0.0491511	0.158031	-4.39525
SGK1	-0.39035	2.71143	-2.0471	0.0491961	0.158083	-4.39603
SLC22A14	-0.297298	2.62059	-2.04653	0.0492553	0.15818	-4.39705
TOX	0.469811	1.8553	2.04475	0.0494411	0.158657	-4.40026
ACAP2	0.200397	2.62016	2.04455	0.0494622	0.158657	-4.40062
BHMT2	-0.370332	2.88335	-2.04286	0.0496386	0.158901	-4.40365
ZNF112	-0.195631	1.8527	-2.0428	0.0496458	0.158901	-4.40377
EIF4E2	-0.147869	2.28837	-2.04257	0.0496694	0.158901	-4.40418
NOTCH1	-0.220449	2.33019	-2.04243	0.0496839	0.158901	-4.40442
RABGAP1	0.21329	3.37604	2.04243	0.0496839	0.158901	-4.40442
TRAPPC3	-0.17195	2.89418	-2.04176	0.049754	0.159032	-4.40562
SLC25A6	0.160241	3.39388	2.03894	0.0500521	0.159891	-4.4107
EFEMP1	0.609085	3.69213	2.0377	0.0501828	0.160215	-4.41292
SF3B3	-0.171531	2.33765	-2.037	0.0502573	0.160265	-4.41418
RAPGEF5	0.236212	2.90198	2.037	0.0502573	0.160265	-4.41418
ID2	0.273879	2.50476	2.03626	0.0503352	0.16042	-4.4155
ERBB3	-0.299409	2.37286	-2.03448	0.0505247	0.160929	-4.41869
DHX30	-0.227145	2.90726	-2.03326	0.0506551	0.16125	-4.42088
CSNK1G2	-0.143894	2.4445	-2.03014	0.0509888	0.162007	-4.42646
ECHDC1	0.139855	2.80818	2.03009	0.0509948	0.162007	-4.42656
ESYT1	0.211045	3.5276	2.03008	0.0509959	0.162007	-4.42657
SAP130	0.136568	2.89446	2.02993	0.0510115	0.162007	-4.42683
TRAPPC13	-0.212081	1.76658	-2.02911	0.0510995	0.162192	-4.4283
HPRT1	0.167044	2.83257	2.02709	0.0513177	0.16279	-4.43192
B3GALT2	-0.510224	2.63873	-2.02679	0.0513501	0.162798	-4.43245
SIVA1	-0.201822	2.72965	-2.02624	0.0514101	0.162893	-4.43344
VEGFA	-0.289869	3.28271	-2.02415	0.0516366	0.163497	-4.43717
NOL9	0.128261	3.27043	2.02393	0.0516605	0.163497	-4.43757
SETD1B	0.159099	3.22929	2.02304	0.0517569	0.163707	-4.43915
TLE4	0.191039	2.18066	2.02235	0.0518322	0.163716	-4.44038
CLOCK	-0.175599	3.18568	-2.02191	0.0518803	0.163716	-4.44117
NOVA1	-0.373928	2.69756	-2.02183	0.0518886	0.163716	-4.4413
CLASP1	0.228379	3.39369	2.0217	0.0519034	0.163716	-4.44155
ASH1L	-0.292614	2.6439	-2.02164	0.05191	0.163716	-4.44165
ARID4B	0.188632	2.69877	2.02093	0.0519873	0.163865	-4.44292
NDUFS2	-0.203644	3.95115	-2.02032	0.0520536	0.163919	-4.444
CASD1	0.167092	2.82082	2.0201	0.0520778	0.163919	-4.44439
OSBPL1A	-0.159128	3.13743	-2.01995	0.0520946	0.163919	-4.44466
DRG1	-0.201942	3.50663	-2.01892	0.0522066	0.164177	-4.44649
WSB2	-0.161541	3.43694	-2.0186	0.0522416	0.164192	-4.44706
CYBB	0.610244	2.77631	2.01815	0.0522918	0.164255	-4.44787
PLCB1	-0.245653	2.52989	-2.01614	0.0525128	0.164854	-4.45145
RNLS	-0.291733	2.017	-2.01553	0.0525804	0.164894	-4.45254
CRIM1	0.480941	2.72284	2.01548	0.0525857	0.164894	-4.45262
PSMB2	-0.168396	3.07291	-2.01432	0.0527133	0.165199	-4.45468
UPF2	0.161857	2.65875	2.01161	0.0530136	0.166	-4.45949
AGRN	0.245395	3.16835	2.01147	0.0530298	0.166	-4.45975
MTCL1	0.441531	2.68534	2.00838	0.0533738	0.166949	-4.46523
ZDHHC6	0.124623	2.69698	2.0082	0.0533944	0.166949	-4.46555
UBXN1	-0.127556	2.95868	-2.00787	0.0534308	0.166953	-4.46613
GLI2	0.268181	1.86661	2.00764	0.0534569	0.166953	-4.46655
ADAP1	0.263195	3.22122	2.00609	0.0536309	0.167401	-4.4693
POLG2	0.137752	2.46845	2.00567	0.0536775	0.167433	-4.47003
TFCP2	0.182334	2.73207	2.00545	0.0537025	0.167433	-4.47043
LILRA2	0.475108	2.0585	2.00348	0.0539246	0.168029	-4.47392
MFAP5	0.490676	2.78406	2.00308	0.0539691	0.168072	-4.47462
PDE3A	-0.381104	2.88689	-2.00217	0.0540718	0.168295	-4.47623
SRP54	0.154917	2.67567	2.00011	0.0543058	0.168927	-4.47988
JMJD1C	0.175066	2.64622	1.99604	0.0547691	0.170271	-4.48707
HARS2	0.14751	2.86649	1.9946	0.0549347	0.170689	-4.48962
TNIK	0.205424	2.58851	1.99432	0.0549666	0.170691	-4.49011
SEMA4G	-0.196536	2.52644	-1.9931	0.055107	0.171029	-4.49227
ILK	-0.209287	3.71353	-1.99208	0.0552244	0.171296	-4.49407
SEC23IP	-0.142317	2.49067	-1.99145	0.0552969	0.171424	-4.49518
PHB	-0.174197	2.91527	-1.9905	0.0554066	0.171666	-4.49686
GPN2	-0.204295	2.46986	-1.98939	0.055534	0.171963	-4.4988
CXCL1	-0.565835	2.20315	-1.98803	0.0556919	0.172342	-4.5012
VAMP2	0.175607	3.38702	1.98779	0.0557197	0.172342	-4.50162
TJP2	-0.215537	3.38476	-1.98689	0.0558248	0.17253	-4.50321
TBC1D5	0.155449	3.08611	1.98646	0.055875	0.17253	-4.50397
SEPTIN9	0.236886	3.68704	1.98645	0.0558755	0.17253	-4.50398
LDLRAD4	-0.190941	2.4673	-1.9856	0.0559748	0.172739	-4.50548
PYGL	-0.291514	2.24858	-1.98504	0.05604	0.172843	-4.50646
PRDM10	-0.207095	2.311	-1.98339	0.0562327	0.173316	-4.50936
MYOT	-0.50973	3.05573	-1.98298	0.0562806	0.173316	-4.51008
PTPRA	0.155111	2.18713	1.98291	0.0562887	0.173316	-4.5102
VAMP8	0.458687	2.3804	1.98112	0.0564994	0.173866	-4.51335
MPP3	-0.418116	3.06964	-1.98009	0.0566199	0.174001	-4.51515
CHMP5	0.159767	2.84739	1.98001	0.0566297	0.174001	-4.5153
ZNF423	0.229688	2.75836	1.97993	0.056639	0.174001	-4.51544
ADNP2	0.171946	2.53701	1.97704	0.0569805	0.174952	-4.52051
RRP1B	0.174432	2.67264	1.97497	0.0572262	0.175607	-4.52414
NKX2-5	-0.276035	3.62018	-1.97455	0.0572752	0.175659	-4.52486
MAZ	-0.203313	3.15103	-1.9727	0.0574957	0.176236	-4.5281
PEPD	-0.171185	2.84008	-1.97121	0.0576739	0.176683	-4.53071
PCIF1	-0.137466	2.40539	-1.96935	0.0578967	0.177266	-4.53396
RPP30	0.19673	3.15805	1.96833	0.0580195	0.177542	-4.53575
PYGB	0.299228	3.83273	1.96628	0.0582664	0.178188	-4.53933
EFEMP2	0.139278	3.26266	1.96604	0.0582957	0.178188	-4.53975
HNRNPH1	0.174137	2.87874	1.96552	0.0583578	0.178203	-4.54065
NAB2	-0.244651	2.88078	-1.96541	0.0583715	0.178203	-4.54085
ADGRB3	-0.183605	1.87941	-1.96518	0.0583988	0.178203	-4.54124
XPA	0.15478	2.51669	1.96266	0.0587045	0.179036	-4.54564
GHR	0.302046	2.79787	1.96183	0.058806	0.179245	-4.5471
CDS2	-0.159839	3.09141	-1.96133	0.058867	0.179313	-4.54797
ASNSD1	-0.16002	2.73748	-1.9611	0.0588942	0.179313	-4.54836
MCUR1	-0.157957	3.03524	-1.96037	0.0589837	0.179485	-4.54964
SLCO3A1	-0.191256	2.91434	-1.96	0.059029	0.179523	-4.55028
MOCOS	-0.371372	1.90807	-1.95829	0.0592375	0.180057	-4.55325
MAGT1	-0.169095	2.48473	-1.95737	0.0593511	0.180271	-4.55486
SELENOW	-0.278441	4.37776	-1.95718	0.059374	0.180271	-4.55519
UCHL3	-0.182485	3.14493	-1.95578	0.0595461	0.180693	-4.55762
STARD13	0.244948	3.02249	1.95476	0.0596714	0.180972	-4.55939
LSM3	0.16856	3.27297	1.95442	0.0597136	0.181	-4.55999
DSG2	-0.292447	3.11885	-1.95396	0.0597706	0.181072	-4.56079
SLC25A16	-0.16475	1.89514	-1.9535	0.0598263	0.18114	-4.56158
PIGK	0.162544	2.88865	1.95253	0.0599473	0.181406	-4.56328
MACF1	0.199234	3.46983	1.95218	0.0599902	0.181408	-4.56388
SLC11A2	-0.154879	2.49275	-1.95198	0.0600147	0.181408	-4.56422
ADAMDEC1	0.437535	1.83653	1.94781	0.0605339	0.182876	-4.57146
MGA	0.150789	2.48756	1.94718	0.0606126	0.183012	-4.57256
TARDBP	0.159113	3.05606	1.94444	0.0609557	0.183863	-4.5773
IPO13	-0.250802	3.24309	-1.94439	0.0609617	0.183863	-4.57738
ANK1	-0.295146	3.43273	-1.94215	0.0612427	0.184608	-4.58125
SFSWAP	0.141681	2.94699	1.94168	0.0613019	0.184685	-4.58206
NFAT5	-0.208473	2.18469	-1.94135	0.0613444	0.184711	-4.58264
TFRC	-0.43458	3.31311	-1.9406	0.0614386	0.184892	-4.58393
RNF220	-0.138143	2.80345	-1.93977	0.0615443	0.185108	-4.58537
KPNA1	-0.24583	2.71482	-1.93852	0.0617019	0.18548	-4.58752
TGOLN2	0.152118	3.12951	1.93799	0.0617689	0.185579	-4.58843
EGR3	-0.734541	2.81955	-1.93635	0.0619782	0.186105	-4.59127
MAPRE2	0.232845	3.56922	1.93571	0.0620593	0.186246	-4.59237
FXYD1	0.350924	3.90182	1.93542	0.0620972	0.186257	-4.59288
TNFAIP1	-0.279359	3.32751	-1.93481	0.0621745	0.186387	-4.59393
KANK2	-0.205309	3.65338	-1.93436	0.0622317	0.186456	-4.5947
BCL7A	-0.286621	2.79466	-1.93349	0.0623437	0.186689	-4.59621
ZNF419	0.230596	3.109	1.93272	0.0624413	0.186753	-4.59752
RPIA	-0.155988	3.11074	-1.93263	0.0624532	0.186753	-4.59768
FECH	0.224164	3.04947	1.93252	0.0624679	0.186753	-4.59788
C1ORF54	0.317422	3.03667	1.93201	0.062533	0.186845	-4.59875
SLC5A1	-0.368259	2.98442	-1.93135	0.0626178	0.186974	-4.59989
ADAM10	-0.20672	2.66108	-1.93114	0.0626445	0.186974	-4.60025
TMEM223	-0.261474	3.15359	-1.92774	0.0630831	0.188064	-4.6061
REPIN1	-0.319764	3.19213	-1.92752	0.0631114	0.188064	-4.60647
UBN1	-0.170256	3.26464	-1.92751	0.0631134	0.188064	-4.6065
MCFD2	-0.191348	2.48072	-1.92723	0.0631496	0.188069	-4.60698
VCAM1	0.507878	2.53141	1.92671	0.0632163	0.188165	-4.60787
REV3L	0.140113	2.77069	1.92626	0.0632742	0.188234	-4.60863
ACTR6	0.18925	2.10062	1.9256	0.0633601	0.188234	-4.60977
C12ORF4	0.160475	2.6206	1.92554	0.0633684	0.188234	-4.60988
MPP5	-0.197098	2.07173	-1.92547	0.0633776	0.188234	-4.61
SRSF6	0.20992	3.08122	1.92336	0.0636523	0.188947	-4.61363
GTF2F2	-0.160642	1.99717	-1.92264	0.0637462	0.189123	-4.61486
SLC16A1	-0.234018	2.79888	-1.9212	0.0639337	0.189388	-4.61732
UBAP2L	-0.156017	2.86039	-1.92118	0.0639358	0.189388	-4.61735
DIAPH2	0.186514	2.60887	1.9208	0.0639859	0.189388	-4.61801
ARMH3	-0.206927	2.55553	-1.92076	0.063991	0.189388	-4.61807
POLR3B	0.162447	2.64853	1.92039	0.0640404	0.189388	-4.61872
TRAK1	0.116438	2.85306	1.92036	0.0640438	0.189388	-4.61877
GTPBP4	-0.160984	2.3926	-1.91892	0.0642334	0.189796	-4.62124
MAFG	-0.180321	2.93726	-1.91876	0.064254	0.189796	-4.62151
KL	-0.28009	1.94638	-1.9184	0.0643005	0.189796	-4.62212
ITIH4	0.312739	2.58353	1.918	0.0643534	0.189796	-4.62281
MCL1	0.233518	3.2198	1.91798	0.0643559	0.189796	-4.62284
TMEM159	-0.283719	3.04527	-1.91753	0.0644153	0.189868	-4.62361
UQCRH	-0.165135	4.0342	-1.91634	0.0645726	0.190229	-4.62565
RIN3	0.193357	2.53272	1.91589	0.0646317	0.190301	-4.62642
CRTC3	0.115406	2.65499	1.91537	0.064701	0.190402	-4.62732
MTHFD2L	0.207354	2.45925	1.91441	0.0648279	0.190672	-4.62896
LYST	0.297915	2.42661	1.91339	0.0649632	0.190967	-4.6307
COG2	-0.197843	3.03728	-1.91194	0.0651554	0.191429	-4.63317
UHRF1BP1L	-0.152017	2.30991	-1.9102	0.0653876	0.192008	-4.63615
ARHGAP35	-0.218013	2.2397	-1.90616	0.0659282	0.193491	-4.64304
GNPTAB	0.175373	2.65706	1.90546	0.0660228	0.193665	-4.64424
DCUN1D4	-0.175081	2.4382	-1.90483	0.0661068	0.193747	-4.6453
EFHD1	0.269597	3.39501	1.90457	0.0661418	0.193747	-4.64574
CCDC40	0.276435	2.24434	1.90445	0.0661577	0.193747	-4.64594
FEZ2	0.177672	3.41526	1.90367	0.0662637	0.193886	-4.64728
UXT	-0.169116	3.21986	-1.90333	0.066309	0.193886	-4.64785
FBXL14	0.150166	2.41735	1.90331	0.0663115	0.193886	-4.64788
MAEA	-0.181895	3.15058	-1.90267	0.0663979	0.194034	-4.64897
CASP8AP2	0.21091	2.91472	1.89973	0.0667969	0.195096	-4.65398
MYL12A	0.243965	4.36006	1.89837	0.0669817	0.195531	-4.65628
SPARCL1	0.2659	4.56237	1.89777	0.0670632	0.195664	-4.6573
EMG1	-0.140888	3.04756	-1.89678	0.0671984	0.195953	-4.65898
ZW10	-0.133353	2.74492	-1.89499	0.0674436	0.196468	-4.66202
H6PD	-0.228601	2.6364	-1.89497	0.0674471	0.196468	-4.66207
RBM23	-0.207184	2.97088	-1.89294	0.0677258	0.197175	-4.66551
LZTR1	0.15413	3.02036	1.89207	0.067845	0.197417	-4.66698
EPB41L3	0.275795	2.24853	1.89148	0.0679263	0.197496	-4.66798
TCF25	0.162792	3.10038	1.89035	0.0680821	0.197496	-4.66989
HCCS	-0.235092	3.1835	-1.89032	0.0680865	0.197496	-4.66994
IRX5	0.685667	3.13112	1.89029	0.0680911	0.197496	-4.67
PRKAG2	-0.364707	3.29213	-1.89006	0.0681219	0.197496	-4.67038
HNRNPAB	-0.200776	3.48041	-1.89006	0.068122	0.197496	-4.67038
ZFC3H1	0.164778	3.00935	1.89004	0.0681256	0.197496	-4.67042
DNAJB1	0.153105	2.9581	1.88951	0.0681978	0.197498	-4.6713
METTL17	-0.145585	3.08825	-1.88951	0.0681988	0.197498	-4.67132
MAVS	-0.247537	2.49149	-1.88847	0.068342	0.197759	-4.67307
TREX2	-0.335064	2.45252	-1.88794	0.0684162	0.197759	-4.67397
MARCKS	0.327293	2.76023	1.88785	0.0684282	0.197759	-4.67412
RAB21	-0.241201	3.63422	-1.88781	0.068434	0.197759	-4.67419
IPO4	-0.211502	2.92247	-1.88665	0.0685948	0.198118	-4.67615
YEATS4	-0.174106	1.77595	-1.8855	0.0687548	0.198475	-4.67809
CST3	-0.185873	3.83173	-1.88502	0.0688221	0.198565	-4.6789
GNB1	0.126089	3.27768	1.88454	0.0688888	0.198592	-4.67971
EXTL2	0.249504	3.21669	1.88427	0.0689263	0.198592	-4.68017
CETN2	0.166388	2.82272	1.88417	0.0689409	0.198592	-4.68034
PDGFRB	-0.211997	3.25989	-1.88355	0.0690277	0.198737	-4.68139
WSB1	0.171928	2.70577	1.88314	0.0690841	0.198795	-4.68207
CALCOCO1	-0.199356	3.3435	-1.88241	0.069187	0.198986	-4.68331
DCTN2	-0.158429	3.60524	-1.88211	0.0692282	0.198999	-4.68381
DNAJC15	0.213271	3.46593	1.88061	0.069439	0.1995	-4.68634
OGDH	-0.321602	3.46741	-1.87996	0.0695306	0.199658	-4.68744
NEK3	0.199736	2.52329	1.87943	0.0696048	0.199766	-4.68833
PRR14	0.229645	3.1561	1.87848	0.0697389	0.200045	-4.68993
TPGS2	0.242795	2.82341	1.87712	0.0699311	0.200491	-4.69223
TMBIM6	-0.148992	3.38284	-1.87521	0.0702017	0.201161	-4.69544
MYBPC3	-0.223439	4.67622	-1.87356	0.0704362	0.201727	-4.69822
MED13L	0.126446	2.60692	1.87284	0.0705388	0.201814	-4.69943
TMEM123	0.158846	2.45009	1.87283	0.0705404	0.201814	-4.69945
ZFYVE21	0.133391	2.74275	1.87192	0.0706699	0.202078	-4.70097
TFDP2	-0.138599	2.75594	-1.86982	0.0709695	0.202828	-4.70449
PHF8	0.21664	2.4222	1.8683	0.0711879	0.203346	-4.70705
SCD5	0.145567	2.49636	1.86667	0.0714222	0.203908	-4.70978
COPG1	0.24738	3.01357	1.86605	0.0715118	0.204058	-4.71083
RNASEH2A	-0.157752	1.95454	-1.86425	0.0717707	0.204514	-4.71383
SFXN1	-0.396382	2.36665	-1.86399	0.071809	0.204514	-4.71427
VPS13C	0.182466	3.27894	1.86397	0.0718111	0.204514	-4.7143
WDFY3	0.119976	2.78548	1.8639	0.0718219	0.204514	-4.71442
TPM2	-0.277487	3.44339	-1.86272	0.0719932	0.204887	-4.7164
GSTM3	-0.289733	3.61726	-1.86239	0.0720409	0.204887	-4.71695
ERG	-0.190026	2.53848	-1.86222	0.0720655	0.204887	-4.71724
SEH1L	-0.187475	2.58039	-1.86165	0.0721475	0.205013	-4.71818
COPS6	-0.175666	2.96789	-1.86047	0.0723189	0.205393	-4.72015
FETUB	-0.397108	2.38855	-1.85929	0.0724912	0.205775	-4.72213
ZNF280D	0.217835	1.91014	1.85748	0.0727549	0.206416	-4.72515
ZNF277	0.173786	2.48555	1.85502	0.0731155	0.207332	-4.72925
TIA1	0.150427	2.53654	1.85454	0.0731865	0.207425	-4.73006
PBX2	-0.173035	2.74403	-1.85421	0.0732356	0.207425	-4.73062
SPG7	-0.1866	3.13841	-1.85402	0.0732626	0.207425	-4.73092
SCLY	-0.193273	1.84202	-1.85351	0.0733382	0.207531	-4.73178
ACTR1B	-0.200185	2.83524	-1.85283	0.0734387	0.207708	-4.73291
HDAC2	-0.174546	2.76854	-1.85159	0.0736207	0.208115	-4.73497
EPHA2	-0.366869	2.66622	-1.85057	0.0737721	0.208435	-4.73667
TRRAP	0.231316	2.72168	1.85017	0.073832	0.208496	-4.73735
LIG4	-0.360013	2.2201	-1.8498	0.0738865	0.208542	-4.73796
FNDC3B	0.246776	2.94088	1.84935	0.0739533	0.208622	-4.73871
SYNJ1	-0.133378	2.18663	-1.84855	0.0740713	0.208847	-4.74003
MED23	0.160151	2.62752	1.84816	0.0741295	0.208893	-4.74068
ZSWIM8	0.129627	3.23117	1.84793	0.074164	0.208893	-4.74107
HNRNPC	0.103029	2.72616	1.84741	0.0742415	0.209003	-4.74193
SETD2	0.168751	2.69095	1.84624	0.0744158	0.209346	-4.74388
NCOA1	-0.145753	3.11691	-1.84599	0.0744535	0.209346	-4.7443
NDUFS5	-0.17922	3.9929	-1.84567	0.0745002	0.209346	-4.74482
XPNPEP3	-0.154349	2.68808	-1.84554	0.0745202	0.209346	-4.74504
CDC42BPB	0.131867	3.15736	1.8453	0.0745551	0.209346	-4.74543
TBP	0.116429	2.39806	1.84482	0.0746282	0.209428	-4.74624
MSH3	0.228806	2.08383	1.84459	0.0746613	0.209428	-4.74661
IL6	-0.685284	2.46902	-1.8442	0.0747208	0.209487	-4.74727
PAIP2B	-0.357807	3.42733	-1.84288	0.0749181	0.209932	-4.74946
EIF3A	0.151899	2.85143	1.84259	0.0749612	0.209945	-4.74993
NCAPD3	0.155147	2.74308	1.84183	0.0750763	0.210091	-4.7512
CPSF6	-0.162897	2.6878	-1.84173	0.0750902	0.210091	-4.75136
SYF2	-0.30177	3.01734	-1.84057	0.0752644	0.21047	-4.75328
RPL10	0.138973	3.13157	1.8402	0.0753208	0.210515	-4.7539
ZNHIT3	0.155681	2.61825	1.83996	0.0753576	0.210515	-4.7543
NAGK	0.201783	3.22701	1.83777	0.0756885	0.211239	-4.75793
BLVRB	-0.166528	3.14243	-1.83773	0.0756943	0.211239	-4.758
GNAS	0.198353	4.02892	1.83716	0.0757807	0.211347	-4.75894
KDM3B	0.147561	3.23723	1.83696	0.0758105	0.211347	-4.75927
GBP2	0.411167	2.75237	1.83583	0.0759823	0.211718	-4.76114
PRCP	0.188771	3.45543	1.83484	0.0761325	0.212028	-4.76277
IFT52	0.194401	2.46094	1.83432	0.0762117	0.212043	-4.76364
ETFB	-0.317912	3.26435	-1.83429	0.0762156	0.212043	-4.76368
KCTD12	0.302129	3.35052	1.83234	0.0765136	0.212763	-4.76691
UQCRC1	-0.324389	4.47245	-1.83048	0.0767983	0.213369	-4.76998
FBXL7	0.168622	2.93278	1.8304	0.0768098	0.213369	-4.7701
SARAF	0.165714	3.21192	1.82802	0.0771756	0.214263	-4.77403
SGSH	0.213871	3.05003	1.8276	0.0772399	0.214263	-4.77472
JUNB	-0.564846	3.11492	-1.82738	0.0772732	0.214263	-4.77508
RCN1	-0.221046	2.94805	-1.82728	0.0772888	0.214263	-4.77525
CD1D	-0.304211	1.93145	-1.82702	0.0773291	0.214266	-4.77568
MBNL1	0.190918	3.25262	1.82626	0.0774458	0.21448	-4.77692
SNTA1	-0.367234	3.10865	-1.82541	0.0775783	0.214723	-4.77834
TIGAR	-0.22303	2.46592	-1.82498	0.0776438	0.214723	-4.77903
DMAC2	-0.224168	3.73161	-1.82469	0.0776893	0.214723	-4.77952
ACAD8	0.243502	3.01612	1.82468	0.077691	0.214723	-4.77954
PACSIN3	-0.285432	3.12261	-1.82315	0.0779284	0.21527	-4.78206
PTOV1	-0.237769	2.93824	-1.82277	0.0779866	0.215322	-4.78268
DCAF6	-0.183423	3.38664	-1.82178	0.0781398	0.215636	-4.7843
PTPN2	0.22773	3.01341	1.8214	0.0781995	0.215691	-4.78493
MAN2B2	0.163294	2.64568	1.81876	0.0786114	0.216627	-4.78927
GSPT1	-0.167617	2.99387	-1.81872	0.0786182	0.216627	-4.78934
RPL4	0.141867	3.77008	1.81794	0.0787398	0.216853	-4.79062
ITIH5	0.27877	2.45509	1.81763	0.0787877	0.216875	-4.79112
ATM	0.220033	2.24386	1.81726	0.0788456	0.216925	-4.79172
ZNF292	0.16245	2.4135	1.81643	0.0789755	0.217173	-4.79308
CAMSAP2	-0.171372	2.71352	-1.81606	0.0790336	0.217223	-4.79369
SLC6A8	-0.191169	3.30435	-1.81536	0.0791442	0.217417	-4.79485
DHRS12	-0.208481	2.65862	-1.81448	0.0792821	0.217591	-4.79628
TPM1	0.199981	3.93582	1.81445	0.0792872	0.217591	-4.79633
PSMA3	-0.171589	3.27196	-1.81376	0.0793967	0.217782	-4.79747
ATP6V1F	-0.2038	3.46888	-1.81319	0.0794866	0.217919	-4.79841
GATD3A	-0.161685	3.4313	-1.81098	0.0798357	0.218766	-4.80202
UBAC1	-0.145749	3.41991	-1.81069	0.0798811	0.21878	-4.80249
SERTAD2	0.163402	2.88409	1.81007	0.0799795	0.21894	-4.80351
SPON2	0.247904	3.18331	1.80915	0.0801256	0.21923	-4.80501
KLF2	0.289499	3.16504	1.80824	0.0802695	0.219513	-4.80649
CANX	0.186612	3.38824	1.80633	0.080575	0.220147	-4.80962
UBB	0.173557	4.38963	1.80628	0.0805819	0.220147	-4.8097
P4HA1	0.204714	3.29483	1.80491	0.0808012	0.220635	-4.81193
GCA	0.273815	2.15935	1.80417	0.0809199	0.220744	-4.81314
VPS52	0.199746	3.31343	1.80416	0.0809219	0.220744	-4.81317
[truncated: 3,454 more rows]

## Sheet: LogFC1adj.p0.05
	logFC	AveExpr	t	P.Value	adj.P.Val	B
C1ORF105	-1.84744	3.29393	-7.78358	8.72687e-09	4.75876e-05	10.0886
ASPN	1.72353	3.78174	7.27103	3.49378e-08	5.19697e-05	8.7899
TSC22D3	1.4886	3.46648	7.23916	3.81219e-08	5.19697e-05	8.70805
MOG	-1.05717	2.34472	-7.01875	6.99046e-08	6.35316e-05	8.13839
ATP10D	1.04253	2.86294	6.88692	1.00709e-07	7.74159e-05	7.79492
LRRC17	1.38235	2.6072	6.40028	3.93108e-07	0.000204065	6.51108
OMD	1.44994	2.61911	6.28956	5.37393e-07	0.000204065	6.21585
COL1A2	1.36413	3.64423	6.15433	7.88255e-07	0.000238797	5.85389
MID1IP1	-1.21983	3.46501	-6.08232	9.67112e-07	0.000245778	5.6606
KLHL41	-1.29104	4.42321	-5.92374	1.5189e-06	0.000306762	5.23373
COL3A1	1.44046	3.97292	5.84861	1.88205e-06	0.000334461	5.03095
PIK3IP1	1.2407	3.01346	5.59917	3.8412e-06	0.000541331	4.3559
SFRP4	1.93566	2.96173	5.48282	5.36166e-06	0.00073091	4.04029
RASL11B	1.40119	3.13055	5.40361	6.72934e-06	0.000748879	3.82526
NPPB	3.42796	4.14613	5.37487	7.3078e-06	0.000781045	3.74721
NAP1L3	1.75589	2.71771	5.36824	7.44807e-06	0.000781045	3.72922
FCN3	-1.2416	3.09532	-5.1812	1.27397e-05	0.00115782	3.2213
RARRES1	-2.01118	2.74775	-5.05342	1.83815e-05	0.0015187	2.87449
ECM2	1.03173	3.20331	5.01632	2.04452e-05	0.00166157	2.77386
ITK	1.78028	2.17906	4.9784	2.27931e-05	0.00166157	2.67106
POSTN	1.8905	3.74972	4.97748	2.28531e-05	0.00166157	2.66858
EVI2A	1.21849	2.60992	4.92797	2.63364e-05	0.00179516	2.53445
RRAD	-1.82419	3.29322	-4.90151	2.84104e-05	0.00188097	2.4628
LY75	1.33675	3.15279	4.80501	3.74477e-05	0.00226891	2.2018
ISLR	1.08586	3.0197	4.75887	4.27281e-05	0.00240203	2.07719
CCN2	1.4145	3.20294	4.74666	4.42457e-05	0.00246196	2.04422
LTBP2	1.65447	3.55936	4.73882	4.52482e-05	0.00247605	2.02306
EVI2B	1.28872	2.62553	4.72223	4.74443e-05	0.00252499	1.97831
CXCR4	1.75686	2.00907	4.72016	4.77251e-05	0.00252499	1.97273
NR4A3	-1.9159	3.32928	-4.66891	5.52431e-05	0.0027934	1.83462
PENK	1.52485	2.52683	4.66839	5.53251e-05	0.0027934	1.83322
E2F8	-1.14421	1.79944	-4.6432	5.94454e-05	0.00291249	1.76542
FMOD	1.38593	3.58351	4.641	5.982e-05	0.00291249	1.75949
DDIT4	1.02392	2.53146	4.58076	7.10192e-05	0.00318468	1.59757
ACE2	1.12315	3.09319	4.44655	0.00010399	0.00386565	1.23803
KCNN2	-1.06017	2.36982	-4.44433	0.000104645	0.00386565	1.23211
MXRA5	1.31967	3.19854	4.43669	0.000106936	0.00388424	1.2117
LUM	1.28657	3.52739	4.43366	0.000107861	0.00388424	1.2036
IL10RA	1.17899	2.83929	4.42749	0.000109761	0.00388424	1.18714
SCRG1	1.13968	2.99559	4.42166	0.000111591	0.00388424	1.17157
SCUBE2	1.08563	2.90668	4.4101	0.000115305	0.00393505	1.14072
CD84	1.35294	2.58086	4.37201	0.000128431	0.00424444	1.0392
LYVE1	-1.14428	2.62216	-4.34794	0.000137477	0.00443587	0.975115
SERPINE2	1.02982	3.61536	4.3277	0.000145565	0.00450579	0.921309
PPP2R2B	1.31738	2.27494	4.26168	0.000175353	0.00498022	0.74616
HLA-DPA1	1.01547	3.62819	4.24585	0.00018335	0.00510011	0.70423
IGFBP2	1.02197	3.34141	4.19374	0.000212277	0.00554949	0.566538
AEBP1	1.14472	3.18784	4.17145	0.000225978	0.00565257	0.507777
KCNIP2	-1.43665	2.572	-4.1394	0.000247225	0.00604537	0.423388
DAPP1	1.3053	3.12402	4.11282	0.00026632	0.00628678	0.353544
COL14A1	1.05118	2.74006	4.06166	0.00030724	0.0070343	0.219447
PRKCB	1.16889	2.50564	4.03013	0.000335463	0.00731712	0.137043
CYTIP	1.19065	1.98336	3.99772	0.000367126	0.00761194	0.0525152
PTPRC	1.05453	2.42598	3.98852	0.000376643	0.00777967	0.0285406
CSF1R	1.05829	3.40936	3.98332	0.000382116	0.00780779	0.0150251
NPPA	1.53129	4.63393	3.97166	0.000394692	0.00797132	-0.015304
HLA-DRB1	1.04566	4.42405	3.96162	0.000405852	0.00807705	-0.0414148
ADAMTS9	-1.00252	2.54822	-3.83982	0.00056831	0.0105408	-0.35634
SLA	1.12718	2.84587	3.81645	0.000606056	0.0108711	-0.416411
STYK1	1.20133	1.5847	3.76099	0.00070567	0.0116254	-0.558454
NELL2	1.24745	2.33969	3.74365	0.000739961	0.0120809	-0.602712
SELE	-1.31363	2.03557	-3.73087	0.000766265	0.0123196	-0.635282
HAMP	-1.32595	2.77454	-3.7289	0.000770398	0.0123196	-0.640297
CD53	1.18986	3.13457	3.72016	0.00078902	0.0125608	-0.662561
SASH3	1.02717	2.54489	3.7186	0.000792393	0.0125608	-0.666538
PTPRO	1.15072	4.85149	3.68795	0.000861464	0.0132914	-0.74441
CORIN	-1.46927	2.86874	-3.67593	0.000890099	0.013408	-0.774864
SELL	1.21766	3.07152	3.6745	0.000893573	0.0134233	-0.778491
CCL2	-1.64944	3.80511	-3.51954	0.0013586	0.0165737	-1.16792
NPR3	1.02153	3.10351	3.51847	0.00136251	0.0165843	-1.17059
RTN1	1.04946	2.39574	3.47034	0.00155007	0.0178247	-1.29015
PLA2G7	1.13614	1.88122	3.46601	0.0015681	0.0179263	-1.30086
UCHL1	1.00307	3.06717	3.43883	0.00168609	0.0185742	-1.36804
ELF3	-2.07617	3.14957	-3.38421	0.00194964	0.020445	-1.50237
TNC	1.09983	2.16229	3.34947	0.00213742	0.0217778	-1.58731
CENPA	1.05398	2.32928	3.27522	0.00259876	0.0247313	-1.76753
AREG	-1.40783	1.49073	-3.2722	0.00261943	0.0248413	-1.77482
FGL2	1.07945	2.90089	3.17031	0.00341595	0.0295201	-2.0189
NR4A2	-1.20171	2.50687	-3.06655	0.00446173	0.0342858	-2.26352
HLA-DRA	1.0086	4.04134	2.90233	0.00675956	0.0441965	-2.64189

## Sheet: Up=60
	logFC	AveExpr	t	P.Value	adj.P.Val	B
ASPN	1.72353	3.78174	7.27103	3.49378e-08	5.19697e-05	8.7899
TSC22D3	1.4886	3.46648	7.23916	3.81219e-08	5.19697e-05	8.70805
ATP10D	1.04253	2.86294	6.88692	1.00709e-07	7.74159e-05	7.79492
LRRC17	1.38235	2.6072	6.40028	3.93108e-07	0.000204065	6.51108
OMD	1.44994	2.61911	6.28956	5.37393e-07	0.000204065	6.21585
COL1A2	1.36413	3.64423	6.15433	7.88255e-07	0.000238797	5.85389
COL3A1	1.44046	3.97292	5.84861	1.88205e-06	0.000334461	5.03095
PIK3IP1	1.2407	3.01346	5.59917	3.8412e-06	0.000541331	4.3559
SFRP4	1.93566	2.96173	5.48282	5.36166e-06	0.00073091	4.04029
RASL11B	1.40119	3.13055	5.40361	6.72934e-06	0.000748879	3.82526
NPPB	3.42796	4.14613	5.37487	7.3078e-06	0.000781045	3.74721
NAP1L3	1.75589	2.71771	5.36824	7.44807e-06	0.000781045	3.72922
ECM2	1.03173	3.20331	5.01632	2.04452e-05	0.00166157	2.77386
ITK	1.78028	2.17906	4.9784	2.27931e-05	0.00166157	2.67106
POSTN	1.8905	3.74972	4.97748	2.28531e-05	0.00166157	2.66858
EVI2A	1.21849	2.60992	4.92797	2.63364e-05	0.00179516	2.53445
LY75	1.33675	3.15279	4.80501	3.74477e-05	0.00226891	2.2018
ISLR	1.08586	3.0197	4.75887	4.27281e-05	0.00240203	2.07719
CCN2	1.4145	3.20294	4.74666	4.42457e-05	0.00246196	2.04422
LTBP2	1.65447	3.55936	4.73882	4.52482e-05	0.00247605	2.02306
EVI2B	1.28872	2.62553	4.72223	4.74443e-05	0.00252499	1.97831
CXCR4	1.75686	2.00907	4.72016	4.77251e-05	0.00252499	1.97273
PENK	1.52485	2.52683	4.66839	5.53251e-05	0.0027934	1.83322
FMOD	1.38593	3.58351	4.641	5.982e-05	0.00291249	1.75949
DDIT4	1.02392	2.53146	4.58076	7.10192e-05	0.00318468	1.59757
ACE2	1.12315	3.09319	4.44655	0.00010399	0.00386565	1.23803
MXRA5	1.31967	3.19854	4.43669	0.000106936	0.00388424	1.2117
LUM	1.28657	3.52739	4.43366	0.000107861	0.00388424	1.2036
IL10RA	1.17899	2.83929	4.42749	0.000109761	0.00388424	1.18714
SCRG1	1.13968	2.99559	4.42166	0.000111591	0.00388424	1.17157
SCUBE2	1.08563	2.90668	4.4101	0.000115305	0.00393505	1.14072
CD84	1.35294	2.58086	4.37201	0.000128431	0.00424444	1.0392
SERPINE2	1.02982	3.61536	4.3277	0.000145565	0.00450579	0.921309
PPP2R2B	1.31738	2.27494	4.26168	0.000175353	0.00498022	0.74616
HLA-DPA1	1.01547	3.62819	4.24585	0.00018335	0.00510011	0.70423
IGFBP2	1.02197	3.34141	4.19374	0.000212277	0.00554949	0.566538
AEBP1	1.14472	3.18784	4.17145	0.000225978	0.00565257	0.507777
DAPP1	1.3053	3.12402	4.11282	0.00026632	0.00628678	0.353544
COL14A1	1.05118	2.74006	4.06166	0.00030724	0.0070343	0.219447
PRKCB	1.16889	2.50564	4.03013	0.000335463	0.00731712	0.137043
CYTIP	1.19065	1.98336	3.99772	0.000367126	0.00761194	0.0525152
PTPRC	1.05453	2.42598	3.98852	0.000376643	0.00777967	0.0285406
CSF1R	1.05829	3.40936	3.98332	0.000382116	0.00780779	0.0150251
NPPA	1.53129	4.63393	3.97166	0.000394692	0.00797132	-0.015304
HLA-DRB1	1.04566	4.42405	3.96162	0.000405852	0.00807705	-0.0414148
SLA	1.12718	2.84587	3.81645	0.000606056	0.0108711	-0.416411
STYK1	1.20133	1.5847	3.76099	0.00070567	0.0116254	-0.558454
NELL2	1.24745	2.33969	3.74365	0.000739961	0.0120809	-0.602712
CD53	1.18986	3.13457	3.72016	0.00078902	0.0125608	-0.662561
SASH3	1.02717	2.54489	3.7186	0.000792393	0.0125608	-0.666538
PTPRO	1.15072	4.85149	3.68795	0.000861464	0.0132914	-0.74441
SELL	1.21766	3.07152	3.6745	0.000893573	0.0134233	-0.778491
NPR3	1.02153	3.10351	3.51847	0.00136251	0.0165843	-1.17059
RTN1	1.04946	2.39574	3.47034	0.00155007	0.0178247	-1.29015
PLA2G7	1.13614	1.88122	3.46601	0.0015681	0.0179263	-1.30086
UCHL1	1.00307	3.06717	3.43883	0.00168609	0.0185742	-1.36804
TNC	1.09983	2.16229	3.34947	0.00213742	0.0217778	-1.58731
CENPA	1.05398	2.32928	3.27522	0.00259876	0.0247313	-1.76753
FGL2	1.07945	2.90089	3.17031	0.00341595	0.0295201	-2.0189
HLA-DRA	1.0086	4.04134	2.90233	0.00675956	0.0441965	-2.64189

## Sheet: Down=20
	logFC	AveExpr	t	P.Value	adj.P.Val	B
C1ORF105	-1.84744	3.29393	-7.78358	8.72687e-09	4.75876e-05	10.0886
MOG	-1.05717	2.34472	-7.01875	6.99046e-08	6.35316e-05	8.13839
MID1IP1	-1.21983	3.46501	-6.08232	9.67112e-07	0.000245778	5.6606
KLHL41	-1.29104	4.42321	-5.92374	1.5189e-06	0.000306762	5.23373
FCN3	-1.2416	3.09532	-5.1812	1.27397e-05	0.00115782	3.2213
RARRES1	-2.01118	2.74775	-5.05342	1.83815e-05	0.0015187	2.87449
RRAD	-1.82419	3.29322	-4.90151	2.84104e-05	0.00188097	2.4628
NR4A3	-1.9159	3.32928	-4.66891	5.52431e-05	0.0027934	1.83462
E2F8	-1.14421	1.79944	-4.6432	5.94454e-05	0.00291249	1.76542
KCNN2	-1.06017	2.36982	-4.44433	0.000104645	0.00386565	1.23211
LYVE1	-1.14428	2.62216	-4.34794	0.000137477	0.00443587	0.975115
KCNIP2	-1.43665	2.572	-4.1394	0.000247225	0.00604537	0.423388
ADAMTS9	-1.00252	2.54822	-3.83982	0.00056831	0.0105408	-0.35634
SELE	-1.31363	2.03557	-3.73087	0.000766265	0.0123196	-0.635282
HAMP	-1.32595	2.77454	-3.7289	0.000770398	0.0123196	-0.640297
CORIN	-1.46927	2.86874	-3.67593	0.000890099	0.013408	-0.774864
CCL2	-1.64944	3.80511	-3.51954	0.0013586	0.0165737	-1.16792
ELF3	-2.07617	3.14957	-3.38421	0.00194964	0.020445	-1.50237
AREG	-1.40783	1.49073	-3.2722	0.00261943	0.0248413	-1.77482
NR4A2	-1.20171	2.50687	-3.06655	0.00446173	0.0342858	-2.26352
