# Supplementary material for: Identification of key immune-related genes in dilated cardiomyopathy using bioinformatics analysis
Source: Sci Rep. 2023 Feb 1;13:1820. doi: 10.1038/s41598-022-26277-w (PMC9892583; doi:10.1038/s41598-022-26277-w)
Supplement: Supplementary file 11 — Supplementary Information 11. [file 41598_2022_26277_MOESM11_ESM.xlsx]

## Sheet: Sheet1
CD53-Cardiovascular disease
Disease Name	Disease ID	Direct Evidence	Inference Network	Inference Score	Reference Count
Heart Diseases	MESH:D006331		Amphetamine|Arsenic Trioxide|Benzo(a)pyrene|bisphenol A|Cadmium Chloride|Cisplatin|Cyclosporine|Dexamethasone|Ethinyl Estradiol|Gentamicins|Lipopolysaccharides|Particulate Matter|perfluorooctanoic acid|pirinixic acid|Resveratrol|Sodium Selenite|Streptozocin|Tamoxifen|Testosterone	56.37	47
Cardiovascular Diseases	MESH:D002318		Acetaminophen|Air Pollutants|Arsenic Trioxide|bisphenol A|Cisplatin|Diethylstilbestrol|Ethinyl Estradiol|Folic Acid|Nanotubes, Carbon|Particulate Matter|perfluorooctanoic acid|Resveratrol|Tamoxifen|Testosterone|Tetrachlorodibenzodioxin	46.34	70
Ventricular Dysfunction, Left	MESH:D018487		Amphetamine|bisphenol A|Cisplatin|Cyclosporine|Dietary Fats|Estradiol|Lipopolysaccharides|Nitroglycerin|Particulate Matter|Propylthiouracil|Resveratrol|Streptozocin	36.93	35
Cardiomyopathies	MESH:D009202		Acetaminophen|Amphetamine|Arsenic Trioxide|Cisplatin|cobaltous chloride|Cyclosporine|Dexamethasone|Folic Acid|Lipopolysaccharides|Resveratrol|Sodium Selenite|Tretinoin	32.42	27
CD53-Immune-related disease
Disease Name	Disease ID	Direct Evidence	Inference Network	Inference Score	Reference Count
Immune System Diseases	MESH:D007154		Arsenic Trioxide|Benzo(a)pyrene|Cyclosporine|Dietary Fats|ethylene dichloride|Mustard Gas|Parathion|tetrabromobisphenol A|Tetrachlorodibenzodioxin	38.35	17
Autoimmune Diseases	MESH:D001327		bisphenol A|Cadmium Chloride|Cyclosporine|Particulate Matter|Resveratrol|Silicon Dioxide|Tetrachlorodibenzodioxin	24.43	9
COL1A2-Cardiovascular disease
Disease Name	Disease ID	Direct Evidence	Inference Network	Inference Score	Reference Count
Heart Diseases	MESH:D006331		2,2',4,4'-tetrabromodiphenyl ether|3,4,5,3',4'-pentachlorobiphenyl|Acetaldehyde|acetovanillone|Acetylcysteine|Acrylamide|Aldosterone|Amlodipine|Amphetamine|Arsenic|Arsenic Trioxide|Benzo(a)pyrene|beta-Naphthoflavone|bisphenol A|boric acid|Cadmium|Cadmium Chloride|Cannabidiol|Cisplatin|Clofibrate|Curcumin|Cyclosporine|Dexamethasone|Disulfiram|Doxorubicin|Drugs, Chinese Herbal|Ethanol|Ethinyl Estra…	175.12	266
Cardiovascular Diseases	MESH:D002318		Acetaminophen|Aldosterone|Amlodipine|Arsenic|Arsenic Trioxide|Asbestos, Amphibole|Ascorbic Acid|bisphenol A|Cadmium|Cisplatin|Copper|Diethylstilbestrol|Dioxins|Disulfiram|Doxorubicin|Endosulfan|Estrogens|Ethanol|Ethinyl Estradiol|Fish Oils|Fluorouracil|Flutamide|Folic Acid|Genistein|Ivermectin|Magnesium|Methamphetamine|Methotrexate|Methylmercury Compounds|muraglitazar|Nanotubes, Carbon|Nicotine|N…	136.18	138
Cardiomyopathies	MESH:D009202		2-(2-amino-3-methoxyphenyl)-4H-1-benzopyran-4-one|Acetaminophen|Acetylcysteine|Amphetamine|Arsenic|Arsenic Trioxide|Ascorbic Acid|boric acid|Calcium|candesartan|Cisplatin|Clofibrate|cobaltous chloride|Copper|Curcumin|Cyclosporine|Dactinomycin|Dexamethasone|Diethylnitrosamine|Doxorubicin|Drugs, Chinese Herbal|Estrogens|Ethanol|ferulic acid|Fluorides|Fluorouracil|Folic Acid|Glucose|Lipopolysacchari…	135.08	451
Ventricular Dysfunction, Left	MESH:D018487		Acetylcysteine|Amphetamine|bisphenol A|Bosentan|candesartan|Cisplatin|cobaltiprotoporphyrin|Curcumin|Cyclosporine|Cytarabine|Dietary Fats|Doxorubicin|Estradiol|Ethanol|Fluorouracil|Glucose|Imatinib Mesylate|Iron, Dietary|lipopolysaccharide, E coli O55-B5|Lipopolysaccharides|Magnesium|Methamphetamine|Niacinamide|Nitroprusside|Oxygen|Paclitaxel|Particulate Matter|Perindopril|Phenelzine|Plant Extrac…	121.52	142
COL1A2-Immune-related disease
Disease Name	Disease ID	Direct Evidence	Inference Network	Inference Score	Reference Count
Immune System Diseases	MESH:D007154		Arsenic|Arsenic Trioxide|Benzo(a)pyrene|Chlorpyrifos|chrysene|Copper|Cyclosporine|dibromoacetic acid|Dietary Fats|Ethanol|Methamphetamine|Methylmercury Compounds|Nicotine|Quercetin|sodium arsenite|Tetrachlorodibenzodioxin|Trichloroethylene|Zinc	65.51	25
Autoimmune Diseases	MESH:D001327		Asbestos, Amphibole|bisphenol A|Cadmium Chloride|Curcumin|Cyclosporine|lipopolysaccharide, E coli O55-B5|Methotrexate|methylmercuric chloride|Methylmercury Compounds|Particulate Matter|Quercetin|Resveratrol|Silicon Dioxide|Tetrachlorodibenzodioxin|Trichloroethylene	43.2	27
COL3A1-Cardiovascular disease
Disease Name	Disease ID	Direct Evidence	Inference Network	Inference Score	Reference Count
Heart Diseases	MESH:D006331		3,4,5,3',4'-pentachlorobiphenyl|acetovanillone|Acrylamide|Aldosterone|Aspirin|Benzo(a)pyrene|benzo(k)fluoranthene|bisphenol A|Cadmium|Cadmium Chloride|candesartan cilexetil|Cannabidiol|Carvedilol|Cisplatin|Citrinin|Cocaine|Curcumin|Cyclosporine|Dexamethasone|Dipyridamole|Disulfiram|Doxorubicin|Drugs, Chinese Herbal|Enalapril|epigallocatechin gallate|Ethanol|Ethinyl Estradiol|Fluorouracil|Gentamic…	187.76	334
Cardiovascular Diseases	MESH:D002318		Acetaminophen|Aldosterone|Angiotensin-Converting Enzyme Inhibitors|Asbestos, Amphibole|Ascorbic Acid|Aspirin|benzo(k)fluoranthene|bisphenol A|Cadmium|Carbon|Cisplatin|Cocaine|Copper|Diclofenac|Disulfiram|Doxorubicin|Enalapril|Endosulfan|Ethanol|Ethinyl Estradiol|Fenofibrate|Fluorouracil|Folic Acid|Genistein|Hydrogen Peroxide|Indomethacin|Ivermectin|Methamphetamine|Methotrexate|Metoprolol|Nanotube…	152.9	128
Ventricular Dysfunction, Left	MESH:D018487		Angiotensin-Converting Enzyme Inhibitors|Anthocyanins|Aspirin|bisphenol A|Carvedilol|Cisplatin|Cocaine|Curcumin|Cyclosporine|Cytarabine|Dietary Fats|Dipyridamole|Doxorubicin|Enalapril|epigallocatechin gallate|Eplerenone|Estradiol|Ethanol|fasudil|Fluorouracil|Glucose|Isoproterenol|lipopolysaccharide, E coli O55-B5|Lipopolysaccharides|Losartan|Methamphetamine|Metoprolol|Norepinephrine|Oxygen|Paclit…	151.13	225
Cardiomyopathies	MESH:D009202		2-(2-amino-3-methoxyphenyl)-4H-1-benzopyran-4-one|Acetaminophen|Angiotensin-Converting Enzyme Inhibitors|Ascorbic Acid|Carvedilol|Cisplatin|cobaltous chloride|Cocaine|Copper|Curcumin|Cyclosporine|Dexamethasone|Diclofenac|Diethylnitrosamine|Doxorubicin|Drugs, Chinese Herbal|Enalapril|Ethanol|Fenofibrate|Fluorouracil|Folic Acid|Glucocorticoids|Glucose|Isoproterenol|Lipopolysaccharides|Methamphetami…	127.93	504
COL3A1-Immune-related disease
Disease Name	Disease ID	Direct Evidence	Inference Network	Inference Score	Reference Count
Immune System Diseases	MESH:D007154		Benzo(a)pyrene|chrysene|Cocaine|Copper|Cyclosporine|Dietary Fats|Ethanol|ethylene dichloride|Methamphetamine|Mustard Gas|Nicotine|ochratoxin A|Quercetin|sodium arsenite|Tetrachlorodibenzodioxin|Trichloroethylene|Ursodeoxycholic Acid|Zinc	65.69	24
Autoimmune Diseases	MESH:D001327		Asbestos, Amphibole|bisphenol A|Cadmium Chloride|Cocaine|Curcumin|Cyclosporine|epigallocatechin gallate|lipopolysaccharide, E coli O55-B5|Methotrexate|methylmercuric chloride|Particulate Matter|Quercetin|Resveratrol|Silicon Dioxide|Tetrachlorodibenzodioxin|Trichloroethylene	47.23	26
POSTN-Cardiovascular disease
Disease Name	Disease ID	Direct Evidence	Inference Network	Inference Score	Reference Count
Heart Diseases	MESH:D006331		Acrylamide|Aristolochic Acids|Arsenic Trioxide|Benzo(a)pyrene|bisphenol A|Cadmium|Cadmium Chloride|Cisplatin|Curcumin|Cyclophosphamide|Dexamethasone|Disulfiram|Doxorubicin|Ethanol|Ethinyl Estradiol|Etoposide|Fluorouracil|Isoproterenol|Lipopolysaccharides|Losartan|Paclitaxel|PF-04254644|pirinixic acid|Plant Extracts|Razoxane|Selenium|sodium arsenite|Sunitinib|T-2 Toxin|Tamoxifen|Testosterone|Tobac…	105.78	297
Cardiovascular Diseases	MESH:D002318		Acetaminophen|Arsenic Trioxide|bisphenol A|Cadmium|Cisplatin|Copper|Disulfiram|Doxorubicin|Estrogens|Ethanol|Ethinyl Estradiol|Fluorouracil|Folic Acid|Genistein|Ivermectin|Lead|Methotrexate|Nickel|Progesterone|rofecoxib|Sunitinib|Tamoxifen|Testosterone|Tetrachlorodibenzodioxin|Tobacco Smoke Pollution|Valsartan	82.9	48
Cardiomyopathies	MESH:D009202		2-(2-amino-3-methoxyphenyl)-4H-1-benzopyran-4-one|Acetaminophen|Arsenic Trioxide|Cisplatin|cobaltous chloride|Copper|Curcumin|Cyclophosphamide|Dexamethasone|Doxorubicin|Estrogens|Ethanol|Fluorouracil|Folic Acid|Isoproterenol|Lipopolysaccharides|Methotrexate|Oxygen|Paclitaxel|PF-04254644|Plant Extracts|Razoxane|SB 203580|sodium arsenite|Tretinoin|Valsartan|Vincristine	82.3	482
Ventricular Dysfunction, Left	MESH:D018487		bisphenol A|Cisplatin|Curcumin|Cyclophosphamide|Cytarabine|Dietary Fats|Doxorubicin|Estradiol|Ethanol|Fluorouracil|Isoproterenol|Lipopolysaccharides|Losartan|Oxygen|Paclitaxel|Plant Extracts|Propylthiouracil|Razoxane|sodium arsenite|Sunitinib|Tobacco Smoke Pollution|Valsartan	70.87	133
POSTN-Immune-related disease
Disease Name	Disease ID	Direct Evidence	Inference Network	Inference Score	Reference Count
Immune System Diseases	MESH:D007154		Arsenic Trioxide|Benzo(a)pyrene|Copper|Cyclophosphamide|Dietary Fats|Ethanol|Lead|ochratoxin A|perfluorooctane sulfonic acid|Silver|sodium arsenite|Tetrachlorodibenzodioxin	49.19	17
Autoimmune Diseases	MESH:D001327		bisphenol A|Cadmium Chloride|Curcumin|Cyclophosphamide|Methotrexate|Silicon Dioxide|Silver|Tetrachlorodibenzodioxin	25.38	11
